# Supplementary material for: In-depth Proteomic Analysis of Alfalfa Silage Inoculated with Lactiplantibacillus plantarum Reveals Protein Transformation Mechanisms and Optimizes Dietary N Utilization
Source: Research Square preprint supplement (doi:10.21203/rs.3.rs-4190256/v1), 2024-04-11
Supplement: Supplementary file 1 [file 36bbe426bef45547f2325a7a.xlsx]

## Sheet: name
Accession	Protein.Name	Gene.Symbol	Description	Exp..q.value..Combined	Sum.PEP.Score	Coverage....	X..Peptides	X..PSMs	X..Unique.Peptides	X..AAs	MW..kDa.	calc..pI	Score.Sequest.HT	X..Razor.Peptides	X..Protein.Groups	CK7	CK8	CK9	LN7	LN8	LN9	LB7	LB8	LB9	PR7	PR8	PR9	FR7	FR8	FR9	CK10	CK11	CK12	LN10	LN11	LN12	LB10	LB11	LB12	PR10	PR11	PR12	FR10	FR11	FR12	GO_ID	KEGG_Anntation	Pathways
A2Q5A3	H(+)-transporting two-sector ATPase	MtrDRAFT_AC160516g59v2	H(+)-transporting two-sector ATPase OS=Medicago truncatula OX=3880 GN=MtrDRAFT_AC160516g59v2 PE=3 SV=1	0	628.853	67	31	750	7	614	66.6	5.91	2416.94	58	1	4.82731e+08	4.99779e+08	5.17739e+08	5.50541e+08	5.55161e+08	6.0239e+08	5.47438e+08	5.47421e+08	4.60632e+08	5.32916e+08	4.89373e+08	5.03766e+08	1.21464e+09	1.20683e+09	1.17118e+09	4.77639e+08	5.20979e+08	5.35594e+08	5.7797e+08	5.70944e+08	6.26003e+08	5.38114e+08	5.43791e+08	4.66611e+08	5.53742e+08	4.98298e+08	5.08952e+08	1.25722e+09	1.1096e+09	1.15412e+09	GO:0005524, GO:0015986, GO:0045261, GO:0046933, GO:1902600, GO:0046034	atr:2546496|atpB, AmtrCp029|http://www.genome.jp/dbget-bin/www_bget?atr:2546496	Photosynthesis
Q2HW53	Ferredoxin-dependent glutamate synthase	11415038	Ferredoxin-dependent glutamate synthase OS=Medicago truncatula OX=3880 GN=11415038 PE=3 SV=1	0	598.446	41	55	469	55	1612	175.7	6.86	1454.92	0	1	2.26983e+08	2.60459e+08	2.55771e+08	3.12782e+08	2.91755e+08	3.17061e+08	2.8995e+08	2.91868e+08	2.50733e+08	2.85386e+08	2.63029e+08	2.68774e+08	5.6745e+08	5.42448e+08	5.41551e+08	2.29403e+08	2.52212e+08	2.47329e+08	2.99436e+08	2.92511e+08	3.18477e+08	2.93352e+08	2.90815e+08	2.51268e+08	2.88011e+08	2.65516e+08	2.68928e+08	5.95573e+08	4.98679e+08	5.49847e+08	GO:0016638, GO:0006807, GO:0015930, GO:0003824, GO:0006537, GO:0016491	atr:18444596||http://www.genome.jp/dbget-bin/www_bget?atr:18444596	Nitrogen metabolism
S4T017	Ribulose bisphosphate carboxylase large chain	rbcL	Ribulose bisphosphate carboxylase large chain OS=Medicago truncatula OX=3880 GN=rbcL PE=3 SV=1	0	569.904	60	31	2611	7	475	52.6	6.58	7682.99	50	1	6.32142e+09	6.28319e+09	6.15271e+09	9.51632e+09	1.12428e+10	1.17118e+10	1.16601e+10	1.19143e+10	4.6229e+09	1.11661e+10	5.6751e+09	6.10597e+09	2.36177e+10	2.28025e+10	2.19253e+10	6.32321e+09	6.32381e+09	6.12466e+09	9.44717e+09	1.09409e+10	1.15596e+10	1.1071e+10	1.15253e+10	4.85262e+09	1.09072e+10	5.95338e+09	6.36036e+09	2.42201e+10	2.26834e+10	2.24427e+10	GO:0015977, GO:0000287, GO:0016984	atr:2546579|rbcL, AmtrCp030|http://www.genome.jp/dbget-bin/www_bget?atr:2546579	Glyoxylate and dicarboxylate metabolism
W8CYL6	ATP synthase subunit beta, chloroplastic	atpB	ATP synthase subunit beta, chloroplastic OS=Medicago truncatula f. tricycla OX=304102 GN=atpB PE=3 SV=1	0	538.433	70	26	641	3	490	52.7	5.39	1999.28	0	1	6.85243e+06	5.19299e+06	4.93288e+06	4.66019e+06	7.01292e+06	6.3857e+06	6.54541e+06	6.96286e+06	3.46754e+06	7.50654e+06	4.9943e+06	5.87876e+06	4.07657e+07	1.9755e+07	4.60804e+07	1.13735e+07	1.08689e+07	1.07276e+07	1.10138e+07	1.33404e+07	1.33986e+07	1.45047e+07	1.53851e+07	8.36286e+06	1.44393e+07	9.50606e+06	1.00429e+07	4.62019e+07	2.10534e+07	3.83821e+07	GO:0046034, GO:1902600, GO:0046933, GO:0045261, GO:0015986, GO:0005524	atr:2546496|atpB, AmtrCp029|http://www.genome.jp/dbget-bin/www_bget?atr:2546496	Photosynthesis
G7I9Z0	Glycine cleavage system P protein	11415278	Glycine cleavage system P protein OS=Medicago truncatula OX=3880 GN=11415278 PE=3 SV=1	0	510.475	38	37	418	37	1056	114.6	7.31	1253.46	0	1	2.8831e+08	2.81086e+08	2.82889e+08	3.47812e+08	3.75536e+08	3.91715e+08	3.76882e+08	3.8708e+08	2.61295e+08	3.65863e+08	2.78829e+08	2.93492e+08	6.93592e+08	6.7863e+08	6.64856e+08	2.66089e+08	2.68048e+08	2.64905e+08	3.23095e+08	3.54595e+08	3.76143e+08	3.58531e+08	3.71277e+08	2.63131e+08	3.53065e+08	2.8058e+08	2.87869e+08	7.031e+08	6.87069e+08	6.81138e+08	GO:0003824, GO:0006546, GO:0004375, GO:0006544	atr:18448171||http://www.genome.jp/dbget-bin/www_bget?atr:18448171	Glycine, serine and threonine metabolism
A0A072UYT5	Ribulose bisphosphate carboxylase/oxygenase activase	25489329	Ribulose bisphosphate carboxylase/oxygenase activase OS=Medicago truncatula OX=3880 GN=25489329 PE=4 SV=1	0	507.472	55	23	529	11	422	46.6	6.83	1773.1	24	1	4.44313e+08	4.59673e+08	4.5123e+08	6.22305e+08	6.91548e+08	7.49519e+08	7.39882e+08	7.01874e+08	4.07033e+08	6.62689e+08	4.20611e+08	4.48312e+08	1.07538e+09	9.62022e+08	1.0148e+09	4.5568e+08	4.98824e+08	4.89789e+08	6.70883e+08	7.05614e+08	8.04842e+08	6.93859e+08	7.13858e+08	4.46531e+08	6.71368e+08	4.77113e+08	4.9136e+08	1.10984e+09	8.98763e+08	1.02781e+09	GO:0016887, GO:0005524	atr:18436244||http://www.genome.jp/dbget-bin/www_bget?atr:18436244	---
G7K4R2	Heat shock protein 81-2	11423533	Heat shock protein 81-2 OS=Medicago truncatula OX=3880 GN=11423533 PE=3 SV=1	0	489.943	43	36	435	23	699	80.1	5.03	1380.64	21	1	4.30823e+08	5.2916e+08	5.3294e+08	5.78605e+08	4.8333e+08	5.38052e+08	4.7758e+08	4.81962e+08	4.73629e+08	4.53696e+08	4.92225e+08	4.71718e+08	5.08936e+08	5.1458e+08	5.07617e+08	4.29155e+08	5.43896e+08	5.56709e+08	5.93907e+08	5.08088e+08	5.54055e+08	4.84973e+08	5.02953e+08	4.72723e+08	4.66905e+08	4.69235e+08	4.69713e+08	5.47762e+08	5.17963e+08	5.32988e+08	GO:0006457, GO:0051082, GO:0005524, GO:0016887	atr:18447377||http://www.genome.jp/dbget-bin/www_bget?atr:18447377	Protein processing in endoplasmic reticulum
Q2HT97	Heat shock cognate 70 kDa protein	11423681	Heat shock cognate 70 kDa protein OS=Medicago truncatula OX=3880 GN=11423681 PE=3 SV=1	0	459.509	60	34	367	9	649	71	5.22	1132.64	39	1	1.92022e+08	2.08908e+08	2.06557e+08	2.40722e+08	2.50262e+08	2.65901e+08	2.50781e+08	2.50861e+08	1.84352e+08	2.34795e+08	1.99665e+08	1.9941e+08	4.40173e+08	4.25855e+08	4.23827e+08	1.98247e+08	2.09401e+08	2.10317e+08	2.30017e+08	2.30867e+08	2.52638e+08	2.31481e+08	2.24101e+08	2.02846e+08	2.17333e+08	2.09199e+08	2.1375e+08	4.57289e+08	4.25158e+08	4.45673e+08	GO:0016887, GO:0005524	atr:18426511||http://www.genome.jp/dbget-bin/www_bget?atr:18426511	Endocytosis
A0A072TKG8	Ribulose bisphosphate carboxylase large chain	MTR_0002s0660	Ribulose bisphosphate carboxylase large chain OS=Medicago truncatula OX=3880 GN=MTR_0002s0660 PE=3 SV=1	0	436.179	47	26	1782	6	479	53	6.68	4945.59	0	1	1.15125e+08	2.30568e+08	1.88266e+08	4.17274e+08	2.2851e+08	2.88329e+08	2.1548e+08	2.35479e+08	1.76448e+08	1.99897e+08	2.08864e+08	2.2212e+08	5.31574e+08	5.60037e+08	5.31017e+08	1.40612e+08	2.26988e+08	2.00385e+08	3.70074e+08	2.37024e+08	2.8681e+08	2.11104e+08	2.12124e+08	1.81719e+08	2.0192e+08	2.16462e+08	2.11374e+08	4.51102e+08	4.60838e+08	4.37811e+08	GO:0016984, GO:0000287, GO:0015977	atr:2546579|rbcL, AmtrCp030|http://www.genome.jp/dbget-bin/www_bget?atr:2546579	Glyoxylate and dicarboxylate metabolism
A0A072V2V0	ATP-dependent Clp protease ATP-binding subunit	25491143	ATP-dependent Clp protease ATP-binding subunit OS=Medicago truncatula OX=3880 GN=25491143 PE=3 SV=1	0	425.549	44	40	334	11	922	102.7	6.77	999.33	37	1	1.2146e+08	1.36966e+08	1.32885e+08	1.68915e+08	1.61564e+08	1.73407e+08	1.64202e+08	1.63979e+08	1.24827e+08	1.55808e+08	1.30977e+08	1.31343e+08	2.39188e+08	2.52726e+08	2.38769e+08	1.21749e+08	1.39779e+08	1.35429e+08	1.77976e+08	1.65491e+08	1.79616e+08	1.631e+08	1.61203e+08	1.3358e+08	1.55406e+08	1.3784e+08	1.3941e+08	2.41258e+08	2.38594e+08	2.3572e+08	GO:0005515, GO:0016887, GO:0005524	atr:18434399||http://www.genome.jp/dbget-bin/www_bget?atr:18434399	---
G7ZVI4	Oxygen-evolving enhancer protein 1	25501656	Oxygen-evolving enhancer protein 1 OS=Medicago truncatula OX=3880 GN=25501656 PE=3 SV=1	0	416.029	60	18	332	5	329	35	6.62	1154.98	22	1	1.56602e+08	1.77905e+08	1.74798e+08	1.80507e+08	1.60244e+08	1.73805e+08	1.67421e+08	1.64315e+08	1.71481e+08	1.69017e+08	1.89034e+08	2.02642e+08	8.39652e+08	6.50637e+08	7.41643e+08	1.57578e+08	1.84786e+08	1.75135e+08	1.94013e+08	1.80095e+08	1.91614e+08	1.80897e+08	1.84858e+08	1.82431e+08	1.86148e+08	2.06791e+08	2.16284e+08	7.60671e+08	6.42127e+08	6.99383e+08	GO:0010242, GO:0042549, GO:0009654, GO:0010207	atr:18445981||http://www.genome.jp/dbget-bin/www_bget?atr:18445981	Photosynthesis
G7JBT5	Clathrin heavy chain	11411271	Clathrin heavy chain OS=Medicago truncatula OX=3880 GN=11411271 PE=3 SV=2	0	413.652	26	43	266	15	1705	193	5.5	787.83	4	1	3.78495e+07	3.81022e+07	3.94306e+07	3.65789e+07	3.73727e+07	3.86601e+07	3.92995e+07	3.86682e+07	3.34565e+07	3.93125e+07	3.3181e+07	3.36398e+07	3.46883e+07	3.56531e+07	3.49576e+07	4.05442e+07	3.84575e+07	4.02263e+07	3.88784e+07	3.99938e+07	4.0934e+07	4.11138e+07	4.20942e+07	3.53385e+07	4.14489e+07	3.47075e+07	3.49222e+07	3.26013e+07	3.32946e+07	3.32031e+07	GO:0005198, GO:0016192, GO:0032051, GO:0071439, GO:0030132, GO:0030130, GO:0005515, GO:0006886	atr:18433494||http://www.genome.jp/dbget-bin/www_bget?atr:18433494	Endocytosis
A0A072VDW9	RuBisCO large subunit-binding protein subunit beta	25482040	RuBisCO large subunit-binding protein subunit beta OS=Medicago truncatula OX=3880 GN=25482040 PE=3 SV=1	0	405.163	45	28	319	1	591	62.6	5.87	1011.81	46	1	8.44466e+07	8.21447e+07	8.03661e+07	1.03065e+08	1.09173e+08	1.14388e+08	1.19373e+08	1.24661e+08	8.42839e+07	1.19754e+08	9.30986e+07	9.85837e+07	3.09397e+08	2.97951e+08	2.94086e+08	9.08498e+07	8.64357e+07	8.89347e+07	9.95501e+07	1.09724e+08	1.17416e+08	1.18794e+08	1.16829e+08	1.05396e+08	1.14429e+08	1.09174e+08	1.16131e+08	2.8113e+08	2.72009e+08	2.69837e+08	GO:0005524, GO:0016887, GO:0042026, GO:0006457	atr:18428814||http://www.genome.jp/dbget-bin/www_bget?atr:18428814	RNA degradation
A0A072VEG8	Putative chaperonin Cpn60/TCP-1 family, groEL-like apical domain, groEL-like equatorial	25482039	Putative chaperonin Cpn60/TCP-1 family, groEL-like apical domain, groEL-like equatorial OS=Medicago truncatula OX=3880 GN=25482039 PE=3 SV=1	0	404.274	45	28	320	1	591	62.7	5.76	1008.81	0	1	2.77044e+06	2.67158e+06	2.52403e+06	3.33531e+06	3.46668e+06	3.42586e+06	4.14381e+06	3.77088e+06	2.76358e+06	3.97669e+06	3.15207e+06	3.16935e+06	1.08485e+07	1.21831e+07	1.0731e+07	2.71307e+06	2.9467e+06	2.71298e+06	3.8992e+06	3.23841e+06	3.57852e+06	3.60068e+06	3.68466e+06	3.17536e+06	3.66179e+06	3.6397e+06	3.7014e+06	9.47136e+06	1.00936e+07	9.30147e+06	GO:0042026, GO:0006457, GO:0016887, GO:0005524	atr:18428814||http://www.genome.jp/dbget-bin/www_bget?atr:18428814	RNA degradation
G7J5Y4	Glyceraldehyde-3-phosphate dehydrogenase	11428156	Glyceraldehyde-3-phosphate dehydrogenase OS=Medicago truncatula OX=3880 GN=11428156 PE=3 SV=1	0	395.019	54	26	691	20	451	47.9	7.2	1998.76	12	1	8.59968e+08	7.42424e+08	7.72088e+08	1.00242e+09	1.26573e+09	1.28107e+09	1.20533e+09	1.24431e+09	8.67658e+08	1.19572e+09	8.83825e+08	8.77194e+08	1.18615e+09	1.24662e+09	1.16525e+09	8.82641e+08	7.58106e+08	7.76251e+08	1.01646e+09	1.31398e+09	1.34162e+09	1.26559e+09	1.31585e+09	9.35467e+08	1.24722e+09	9.02997e+08	8.93552e+08	1.13472e+09	1.13849e+09	1.14166e+09	GO:0016620, GO:0050661, GO:0051287, GO:0006006	atr:18445484||http://www.genome.jp/dbget-bin/www_bget?atr:18445484	Carbon metabolism
G7K259	Clathrin heavy chain	11420719	Clathrin heavy chain OS=Medicago truncatula OX=3880 GN=11420719 PE=3 SV=1	0	384.606	27	44	244	15	1706	193.2	5.44	707.28	36	1	1.17087e+08	1.19749e+08	1.23666e+08	1.21156e+08	1.25113e+08	1.26892e+08	1.26085e+08	1.27186e+08	1.06585e+08	1.20361e+08	1.07157e+08	1.05928e+08	1.06163e+08	1.09544e+08	1.06071e+08	1.21998e+08	1.15906e+08	1.22508e+08	1.13087e+08	1.26208e+08	1.29952e+08	1.21878e+08	1.24184e+08	1.05186e+08	1.19081e+08	1.03105e+08	1.02204e+08	1.05767e+08	1.07976e+08	1.05705e+08	GO:0005198, GO:0032051, GO:0016192, GO:0071439, GO:0006886, GO:0005515, GO:0030132, GO:0030130	atr:18433494||http://www.genome.jp/dbget-bin/www_bget?atr:18433494	Endocytosis
B7FL88	Uncharacterized protein		Uncharacterized protein OS=Medicago truncatula OX=3880 PE=2 SV=1	0	371.763	52	33	313	5	649	71	5.19	965.29	13	1	8.58072e+07	9.63808e+07	1.0049e+08	1.05158e+08	9.42331e+07	1.01874e+08	7.64634e+07	8.11928e+07	1.03419e+08	7.08969e+07	1.08211e+08	1.02643e+08	1.19518e+08	1.17631e+08	1.16439e+08	7.75087e+07	8.42243e+07	8.67238e+07	9.11006e+07	8.65794e+07	9.29895e+07	6.89991e+07	7.19256e+07	9.29441e+07	6.24326e+07	9.28281e+07	9.46242e+07	1.3568e+08	1.23479e+08	1.28696e+08	GO:0016887, GO:0005524	atr:18426511||http://www.genome.jp/dbget-bin/www_bget?atr:18426511	Endocytosis
G7L0I7	5-methyltetrahydropteroyltriglutamate--homocysteine S-methyltransferase	MTR_7g086300	5-methyltetrahydropteroyltriglutamate--homocysteine S-methyltransferase OS=Medicago truncatula OX=3880 GN=MTR_7g086300 PE=3 SV=1	0	371.031	45	30	342	22	803	88.8	6.6	983.73	10	1	3.44947e+08	3.18052e+08	3.34692e+08	3.14163e+08	3.33167e+08	3.54679e+08	3.45613e+08	3.37995e+08	2.57754e+08	3.21534e+08	2.72849e+08	2.5775e+08	4.9437e+08	4.48688e+08	4.84113e+08	3.60168e+08	3.33318e+08	3.54868e+08	3.08181e+08	3.37613e+08	3.54454e+08	3.3816e+08	3.37311e+08	2.73288e+08	3.30759e+08	2.77741e+08	2.84568e+08	5.02585e+08	4.46326e+08	4.65881e+08	GO:0003871, GO:0008652, GO:0008270, GO:0009086	atr:18421537||http://www.genome.jp/dbget-bin/www_bget?atr:18421537	Selenocompound metabolism
G7LIT0	ATP-dependent Clp protease ATP-binding subunit	11438455	ATP-dependent Clp protease ATP-binding subunit OS=Medicago truncatula OX=3880 GN=11438455 PE=3 SV=1	0	364.044	42	38	283	4	926	102.7	6.87	831.79	5	1	9.65096e+06	1.10057e+07	1.08662e+07	1.43964e+07	1.32925e+07	1.51937e+07	1.42127e+07	1.43245e+07	1.15452e+07	1.31054e+07	1.20747e+07	1.23054e+07	1.89776e+07	1.99368e+07	1.87671e+07	1.03538e+07	1.22961e+07	1.17536e+07	1.51211e+07	1.48954e+07	1.64196e+07	1.51107e+07	1.45225e+07	1.21373e+07	1.43104e+07	1.265e+07	1.21566e+07	1.65056e+07	1.7072e+07	1.66459e+07	GO:0016887, GO:0005524, GO:0005515	atr:18434399||http://www.genome.jp/dbget-bin/www_bget?atr:18434399	---
G7J3A3	Alpha-mannosidase	11421286	Alpha-mannosidase OS=Medicago truncatula OX=3880 GN=11421286 PE=3 SV=1	0	362.699	38	37	350	31	1016	114.7	6.95	929.79	11	1	3.55012e+08	3.87337e+08	4.18419e+08	2.72751e+08	2.43742e+08	2.42079e+08	2.12848e+08	2.11653e+08	2.80428e+08	2.07396e+08	2.81055e+08	2.66306e+08	1.77472e+08	1.81849e+08	1.79437e+08	3.83462e+08	3.94442e+08	4.28937e+08	2.59456e+08	2.48475e+08	2.42474e+08	2.06534e+08	2.0327e+08	2.82903e+08	2.13977e+08	2.79802e+08	2.74469e+08	1.57114e+08	1.57969e+08	1.58908e+08	GO:0030246, GO:0005975, GO:0006013, GO:0003824, GO:0004559	atr:18434345||http://www.genome.jp/dbget-bin/www_bget?atr:18434345	Other glycan degradation
A0A072V376	ATP-dependent zinc metalloprotease FTSH	25490290	ATP-dependent zinc metalloprotease FTSH OS=Medicago truncatula OX=3880 GN=25490290 PE=3 SV=1	0	359.673	41	25	187	25	706	75.6	5.85	632.88	0	1	5.83641e+07	5.68614e+07	5.67724e+07	6.63255e+07	6.73258e+07	6.98721e+07	6.86911e+07	6.76722e+07	6.44828e+07	6.74024e+07	6.61243e+07	6.68808e+07	1.29285e+08	1.2762e+08	1.25392e+08	5.15375e+07	5.08935e+07	4.99681e+07	6.19803e+07	6.68563e+07	7.03934e+07	6.94945e+07	7.07785e+07	5.73421e+07	6.88085e+07	5.90278e+07	6.07824e+07	1.22137e+08	1.18774e+08	1.17793e+08	GO:0016887, GO:0004176, GO:0016020, GO:0005524, GO:0006508, GO:0004222	atr:18424304||http://www.genome.jp/dbget-bin/www_bget?atr:18424304	---
S4SZZ8	Cytochrome f	petA	Cytochrome f OS=Medicago truncatula OX=3880 GN=petA PE=3 SV=1	0	358.144	52	24	495	19	320	35.3	8.56	1479.22	11	1	1.27286e+09	1.15636e+09	1.31514e+09	8.46944e+08	8.91749e+08	8.81603e+08	9.37744e+08	9.20961e+08	1.31437e+09	9.18695e+08	1.20723e+09	1.20927e+09	4.27826e+08	4.33085e+08	4.26164e+08	1.24516e+09	1.13282e+09	1.27278e+09	8.31678e+08	9.29692e+08	8.97131e+08	9.26557e+08	9.00206e+08	1.37477e+09	9.363e+08	1.19333e+09	1.22595e+09	4.04803e+08	4.13595e+08	4.06931e+08	GO:0020037, GO:0009055, GO:0031361, GO:0005506, GO:0015979	atr:2546616|petA, AmtrCp035|http://www.genome.jp/dbget-bin/www_bget?atr:2546616	Photosynthesis
A0A072VT43	Translation elongation factor EF-2 subunit	25483153	Translation elongation factor EF-2 subunit OS=Medicago truncatula OX=3880 GN=25483153 PE=3 SV=1	0	351.923	38	35	264	9	843	94.1	6.2	790.03	38	1	1.91214e+08	2.03063e+08	2.0272e+08	2.1162e+08	2.04653e+08	2.14179e+08	2.00129e+08	2.06319e+08	2.00745e+08	2.07865e+08	2.0573e+08	2.0882e+08	2.85752e+08	2.68324e+08	2.73778e+08	1.99033e+08	2.11436e+08	2.0835e+08	2.25779e+08	2.22549e+08	2.32021e+08	2.14434e+08	2.17685e+08	2.29321e+08	2.1735e+08	2.28502e+08	2.29974e+08	2.67482e+08	2.26415e+08	2.47861e+08	GO:0003924, GO:0005525	atr:18443118||http://www.genome.jp/dbget-bin/www_bget?atr:18443118	---
G7JJV9	Fructose-bisphosphate aldolase	11445395	Fructose-bisphosphate aldolase OS=Medicago truncatula OX=3880 GN=11445395 PE=3 SV=1	0	343.434	48	18	493	12	400	43.2	7.3	1527.36	11	1	5.77066e+08	6.56638e+08	6.56213e+08	6.62687e+08	6.57953e+08	6.87261e+08	6.4235e+08	6.47602e+08	6.27307e+08	6.20993e+08	6.63471e+08	7.06157e+08	1.83349e+09	1.72668e+09	1.74673e+09	5.54789e+08	6.12221e+08	6.26903e+08	6.21515e+08	6.82322e+08	7.07999e+08	6.33185e+08	6.1979e+08	5.97088e+08	6.13776e+08	6.27167e+08	6.66474e+08	1.76033e+09	1.68403e+09	1.67483e+09	GO:0006096, GO:0003824, GO:0004332	atr:18436715||http://www.genome.jp/dbget-bin/www_bget?atr:18436715	Fructose and mannose metabolism
A0A072W1H5	ATP synthase subunit beta	25485440	ATP synthase subunit beta OS=Medicago truncatula OX=3880 GN=25485440 PE=3 SV=1	0	342.445	60	24	294	22	559	59.9	6.15	981.51	0	1	1.92627e+08	2.18214e+08	2.30168e+08	2.23035e+08	2.0274e+08	2.17714e+08	1.99141e+08	1.99072e+08	1.8492e+08	1.91226e+08	1.9388e+08	1.89056e+08	2.72667e+08	2.72749e+08	2.69439e+08	2.12631e+08	2.25853e+08	2.36308e+08	2.25499e+08	2.13745e+08	2.30768e+08	2.00309e+08	2.0675e+08	1.84395e+08	1.99225e+08	1.88167e+08	1.86446e+08	2.58122e+08	2.59954e+08	2.54458e+08	GO:0015986, GO:0000275, GO:0006754, GO:0005524, GO:0016887, GO:0046034, GO:1902600, GO:0046933, GO:0045261	atr:18433796||http://www.genome.jp/dbget-bin/www_bget?atr:18433796	Oxidative phosphorylation
G7KYC0	Glyceraldehyde-3-phosphate dehydrogenase	11437530	Glyceraldehyde-3-phosphate dehydrogenase OS=Medicago truncatula OX=3880 GN=11437530 PE=3 SV=1	0	341.494	60	26	615	20	404	43	8.27	1753.51	0	1	6.30463e+08	5.76064e+08	5.7249e+08	7.95563e+08	9.78967e+08	1.00795e+09	9.44337e+08	9.24487e+08	8.26412e+08	9.01882e+08	7.93134e+08	7.94478e+08	7.40515e+08	7.58422e+08	7.40737e+08	6.63812e+08	6.511e+08	6.55568e+08	8.71136e+08	9.9778e+08	1.05202e+09	9.49639e+08	9.66384e+08	8.70712e+08	9.3745e+08	8.20322e+08	8.36823e+08	7.98822e+08	7.55174e+08	7.7909e+08	GO:0016620, GO:0050661, GO:0051287, GO:0006006	atr:18434583||http://www.genome.jp/dbget-bin/www_bget?atr:18434583	Carbon metabolism
G7KGT1	Ribulose bisphosphate carboxylase/oxygenase activase	11442149	Ribulose bisphosphate carboxylase/oxygenase activase OS=Medicago truncatula OX=3880 GN=11442149 PE=4 SV=1	0	340.682	46	20	360	6	476	52.3	6.46	1135.85	2	1	2.38752e+08	2.80498e+08	2.69962e+08	4.0349e+08	3.67493e+08	4.08884e+08	3.67051e+08	3.61615e+08	2.31495e+08	3.56362e+08	2.52081e+08	2.69731e+08	5.78667e+08	6.27166e+08	5.76873e+08	2.38472e+08	2.73194e+08	2.58833e+08	3.91385e+08	3.88747e+08	4.3644e+08	3.96764e+08	3.82396e+08	2.42531e+08	3.3248e+08	2.4643e+08	2.62567e+08	5.48117e+08	5.87573e+08	5.5097e+08	GO:0005524, GO:0016887	atr:18436244||http://www.genome.jp/dbget-bin/www_bget?atr:18436244	---
G7IF28	Transketolase	11424678	Transketolase OS=Medicago truncatula OX=3880 GN=11424678 PE=3 SV=1	0	336.648	39	26	494	25	735	79.7	6.43	1538.58	1	1	3.01865e+08	3.48266e+08	3.34718e+08	4.76416e+08	4.75916e+08	5.17095e+08	4.48684e+08	4.53133e+08	2.90084e+08	4.34766e+08	3.37875e+08	3.46597e+08	1.23172e+09	1.2622e+09	1.19726e+09	3.32259e+08	3.37595e+08	3.42164e+08	4.75339e+08	5.79885e+08	5.90434e+08	4.95434e+08	5.01428e+08	2.74988e+08	4.72523e+08	3.14317e+08	3.30834e+08	1.06867e+09	1.0593e+09	1.03554e+09	GO:0004802, GO:0003824	atr:18434690||http://www.genome.jp/dbget-bin/www_bget?atr:18434690	Pentose phosphate pathway
G7I7Q4	Heat shock protein 81-2	11445571	Heat shock protein 81-2 OS=Medicago truncatula OX=3880 GN=11445571 PE=3 SV=1	0	335.566	44	36	326	34	818	94.1	4.89	963.73	1	1	1.63416e+08	1.75107e+08	1.76224e+08	1.88613e+08	1.82493e+08	1.88841e+08	1.74248e+08	1.76203e+08	1.61685e+08	1.69915e+08	1.64056e+08	1.65557e+08	2.3282e+08	2.1382e+08	2.21948e+08	1.66313e+08	1.74385e+08	1.78667e+08	1.85967e+08	1.92083e+08	1.99585e+08	1.82376e+08	1.81392e+08	1.69339e+08	1.77405e+08	1.6862e+08	1.68558e+08	2.00479e+08	2.03137e+08	2.01884e+08	GO:0051082, GO:0005524, GO:0016887, GO:0006457	atr:18441623||http://www.genome.jp/dbget-bin/www_bget?atr:18441623	Protein processing in endoplasmic reticulum
A0A072U338	Phosphopyruvate hydratase	25499389	Phosphopyruvate hydratase OS=Medicago truncatula OX=3880 GN=25499389 PE=3 SV=1	0	333.881	70	26	229	20	444	47.8	5.8	646.6	8	1	9.97756e+07	1.10124e+08	1.08689e+08	1.3415e+08	1.32619e+08	1.45844e+08	1.27153e+08	1.30016e+08	1.0877e+08	1.28511e+08	1.18164e+08	1.21208e+08	3.57881e+08	3.30508e+08	3.40357e+08	1.25601e+08	1.27011e+08	1.26371e+08	1.44793e+08	1.44448e+08	1.52661e+08	1.3988e+08	1.40113e+08	1.33193e+08	1.31765e+08	1.34414e+08	1.39413e+08	3.39065e+08	3.11305e+08	3.19958e+08	GO:0004634, GO:0000015, GO:0000287, GO:0006096	atr:18441538||http://www.genome.jp/dbget-bin/www_bget?atr:18441538	RNA degradation
G7K9H5	Photosystem II oxygen-evolving enhancer protein	11405827	Photosystem II oxygen-evolving enhancer protein OS=Medicago truncatula OX=3880 GN=11405827 PE=3 SV=1	0	329.8	49	17	270	4	329	34.9	6.39	933.81	0	1	4.70919e+06	5.16151e+06	4.91871e+06	5.72897e+06	5.47134e+06	5.63399e+06	5.79781e+06	5.96383e+06	5.52521e+06	5.74417e+06	5.80222e+06	6.09193e+06	1.73713e+07	1.09077e+07	1.4742e+07	5.59465e+06	5.77599e+06	5.59042e+06	5.98664e+06	6.08248e+06	6.35108e+06	6.21753e+06	6.37459e+06	6.60858e+06	6.57185e+06	6.77585e+06	7.0008e+06	1.66849e+07	9.38491e+06	1.33973e+07	GO:0010242, GO:0010207, GO:0042549, GO:0009654	atr:18445981||http://www.genome.jp/dbget-bin/www_bget?atr:18445981	Photosynthesis
S4T074	Photosystem II CP47 reaction center protein	psbB	Photosystem II CP47 reaction center protein OS=Medicago truncatula OX=3880 GN=psbB PE=3 SV=1	0	328.501	31	14	283	14	508	56	6.77	1000.87	0	1	1.88784e+08	2.30309e+08	2.14623e+08	2.99033e+08	2.51986e+08	2.8107e+08	2.56333e+08	2.45158e+08	3.30333e+08	2.46377e+08	3.3452e+08	3.04643e+08	1.5812e+08	1.55575e+08	1.58949e+08	1.78763e+08	2.51021e+08	2.28414e+08	3.26233e+08	2.6706e+08	3.00811e+08	2.42788e+08	2.47546e+08	3.86842e+08	2.45804e+08	3.65032e+08	3.5867e+08	1.54433e+08	1.49168e+08	1.58174e+08	GO:0016168, GO:0016020, GO:0009523, GO:0009767, GO:0015979, GO:0009772, GO:0019684, GO:0045156, GO:0009521	atr:2546567|psbB, AmtrCp049|http://www.genome.jp/dbget-bin/www_bget?atr:2546567	Photosynthesis
G7J486	Elongation factor Tu	11412641	Elongation factor Tu OS=Medicago truncatula OX=3880 GN=11412641 PE=3 SV=1	0	323.895	53	22	318	20	489	53.2	6.65	912.1	2	1	1.9066e+08	2.03634e+08	2.0747e+08	2.51693e+08	2.53101e+08	2.75661e+08	2.26862e+08	2.35415e+08	1.79677e+08	2.13305e+08	1.81855e+08	1.83033e+08	2.65005e+08	2.48439e+08	2.48568e+08	2.06244e+08	1.995e+08	1.99651e+08	2.56571e+08	2.66953e+08	2.90492e+08	2.54656e+08	2.69547e+08	1.97706e+08	2.39209e+08	1.96462e+08	2.02631e+08	2.38539e+08	2.48904e+08	2.36708e+08	GO:0006414, GO:0003746, GO:0003924, GO:0005525	atr:18442093||http://www.genome.jp/dbget-bin/www_bget?atr:18442093	---
A9YWS0	Serine hydroxymethyltransferase	11405458	Serine hydroxymethyltransferase OS=Medicago truncatula OX=3880 GN=11405458 PE=3 SV=1	0	318.989	55	26	322	17	518	57.4	8.31	954.45	16	1	2.65772e+08	2.80526e+08	2.85888e+08	3.12267e+08	3.07662e+08	3.2645e+08	3.07566e+08	3.10128e+08	2.17888e+08	2.93322e+08	2.31697e+08	2.2758e+08	3.90431e+08	3.92901e+08	3.8102e+08	2.78623e+08	2.83199e+08	2.91188e+08	3.07326e+08	3.1811e+08	3.29352e+08	3.11164e+08	3.20771e+08	2.11729e+08	3.03289e+08	2.24872e+08	2.21636e+08	3.78342e+08	3.70823e+08	3.66296e+08	GO:0019264, GO:0004372, GO:0030170, GO:0003824, GO:0035999	atr:18446429||http://www.genome.jp/dbget-bin/www_bget?atr:18446429	Cyanoamino acid metabolism
A0A072V2R0	Dihydrolipoyl dehydrogenase	25494137	Dihydrolipoyl dehydrogenase OS=Medicago truncatula OX=3880 GN=25494137 PE=3 SV=1	0	317.797	56	25	164	25	502	53.2	7.36	537.07	0	1	7.28928e+07	8.27207e+07	8.37592e+07	9.11608e+07	8.74329e+07	9.54914e+07	8.27962e+07	8.205e+07	8.31632e+07	8.26708e+07	8.48313e+07	8.75109e+07	1.51984e+08	1.39216e+08	1.40935e+08	8.15551e+07	8.54702e+07	8.81927e+07	9.01407e+07	8.69427e+07	9.40789e+07	8.47554e+07	8.59395e+07	9.34969e+07	8.335e+07	1.00387e+08	8.61693e+07	1.51492e+08	1.34751e+08	1.44217e+08	GO:0050660, GO:0016491, GO:0004148, GO:0016668, GO:0045454	atr:18448186||http://www.genome.jp/dbget-bin/www_bget?atr:18448186	Lysine degradation
W8CYA0	ATP synthase subunit alpha, chloroplastic	atpA	ATP synthase subunit alpha, chloroplastic OS=Medicago truncatula f. tricycla OX=304102 GN=atpA PE=3 SV=1	0	313.757	38	16	519	11	510	55.7	5.35	1740.43	7	1	6.84513e+08	5.37352e+08	5.50778e+08	7.56073e+08	9.76193e+08	9.53569e+08	1.01264e+09	1.09536e+09	3.80768e+08	1.01289e+09	4.33074e+08	4.3257e+08	1.41815e+09	1.50044e+09	1.37823e+09	6.84626e+08	5.65472e+08	5.67984e+08	7.99448e+08	1.05027e+09	1.01374e+09	1.0646e+09	1.10568e+09	4.08135e+08	1.0331e+09	4.65557e+08	4.72454e+08	1.43078e+09	1.45454e+09	1.39204e+09	GO:0005524, GO:0015986, GO:0046933, GO:0045261, GO:1902600, GO:0032559, GO:0046034	atr:2546497|atpA, AmtrCp007|http://www.genome.jp/dbget-bin/www_bget?atr:2546497	Photosynthesis
I3RZQ8	Beta-amylase		Beta-amylase OS=Medicago truncatula OX=3880 PE=2 SV=1	0	313.584	44	19	364	18	496	56.2	5.3	1081.01	1	1	3.99353e+08	3.82731e+08	4.58183e+08	1.82522e+08	2.07865e+08	1.77229e+08	1.77712e+08	1.76734e+08	2.29805e+08	1.75663e+08	2.26089e+08	2.19853e+08	1.50717e+08	1.51197e+08	1.51544e+08	4.26713e+08	3.81837e+08	4.44402e+08	1.85506e+08	2.06726e+08	1.83171e+08	1.82215e+08	1.7773e+08	2.35384e+08	1.75582e+08	2.28936e+08	2.20778e+08	1.4494e+08	1.46224e+08	1.4806e+08	GO:0000272, GO:0016161	atr:18427900||http://www.genome.jp/dbget-bin/www_bget?atr:18427900	Starch and sucrose metabolism
G7JJ97	Aminomethyltransferase	11437303	Aminomethyltransferase OS=Medicago truncatula OX=3880 GN=11437303 PE=2 SV=2	0	312.355	54	22	343	14	407	44.1	8.7	960.34	11	1	2.74877e+08	2.60827e+08	2.5958e+08	3.34986e+08	4.0688e+08	4.10999e+08	4.03559e+08	4.2324e+08	2.61247e+08	3.8801e+08	2.67733e+08	2.63546e+08	3.89114e+08	4.07078e+08	3.90018e+08	2.85089e+08	2.66809e+08	2.67316e+08	3.53317e+08	4.10476e+08	4.34226e+08	4.03059e+08	4.21428e+08	2.85551e+08	3.89005e+08	2.86269e+08	2.90111e+08	3.96965e+08	4.03231e+08	3.93382e+08	GO:0004047, GO:0005515, GO:0006546	atr:18445781||http://www.genome.jp/dbget-bin/www_bget?atr:18445781	One carbon pool by folate
A0A072TUS4	Heat shock 70 kDa protein	25502230	Heat shock 70 kDa protein OS=Medicago truncatula OX=3880 GN=25502230 PE=3 SV=1	0	311.348	48	32	257	8	668	73.7	5.19	734.9	0	1	8.26585e+06	7.63157e+06	7.71343e+06	8.03053e+06	8.07129e+06	8.19519e+06	8.52214e+06	8.94478e+06	7.83925e+06	8.41982e+06	7.97634e+06	8.37635e+06	1.86558e+07	1.91335e+07	1.85024e+07	6.8755e+06	7.33785e+06	7.51394e+06	7.81808e+06	7.38454e+06	7.8395e+06	7.71548e+06	7.78343e+06	7.57351e+06	7.50165e+06	8.09964e+06	8.29993e+06	1.93146e+07	1.86709e+07	1.97526e+07	GO:0005524, GO:0016887	atr:18423094||http://www.genome.jp/dbget-bin/www_bget?atr:18423094	Protein export
A0A072TV12	Heat shock cognate 70 kDa-like protein	25502238	Heat shock cognate 70 kDa-like protein OS=Medicago truncatula OX=3880 GN=25502238 PE=3 SV=1	0	310.804	51	33	263	9	669	73.6	5.12	752.15	32	1	6.82635e+07	8.34028e+07	7.93062e+07	9.54648e+07	8.5469e+07	9.06832e+07	7.82823e+07	7.71778e+07	8.14299e+07	7.65547e+07	8.87552e+07	8.80938e+07	2.0529e+08	2.07582e+08	2.0274e+08	7.78047e+07	8.02679e+07	7.97741e+07	8.94855e+07	8.58552e+07	9.26247e+07	8.39754e+07	8.37647e+07	8.38127e+07	8.26647e+07	8.9065e+07	9.05868e+07	1.88159e+08	1.85693e+08	1.81144e+08	GO:0005524, GO:0016887	atr:18423094||http://www.genome.jp/dbget-bin/www_bget?atr:18423094	Protein export
G7L3V5	ATPase, AAA-type, CDC48 protein	11432951	ATPase, AAA-type, CDC48 protein OS=Medicago truncatula OX=3880 GN=11432951 PE=4 SV=2	0	306.156	46	31	183	5	809	89.7	5.29	585.74	32	1	6.62518e+07	6.99715e+07	6.802e+07	8.0484e+07	8.03215e+07	8.58176e+07	8.5099e+07	8.65576e+07	7.15767e+07	8.28474e+07	7.3974e+07	7.32219e+07	1.28203e+08	1.33927e+08	1.26975e+08	6.55055e+07	6.9896e+07	6.91133e+07	8.24526e+07	8.25172e+07	8.81479e+07	8.48845e+07	8.52197e+07	7.49601e+07	8.39108e+07	7.50201e+07	7.77657e+07	1.28565e+08	1.31237e+08	1.25412e+08	GO:0016887, GO:0005524, GO:0016787	atr:18426439||http://www.genome.jp/dbget-bin/www_bget?atr:18426439	Protein processing in endoplasmic reticulum
A0A072UM13	Heat shock cognate 70 kDa protein	25492496	Heat shock cognate 70 kDa protein OS=Medicago truncatula OX=3880 GN=25492496 PE=3 SV=1	0	303.576	43	25	279	4	649	71	5.15	867.87	1	1	1.12731e+07	1.02305e+07	1.05041e+07	1.08576e+07	1.27779e+07	1.24987e+07	1.3053e+07	1.32834e+07	8.47936e+06	1.27776e+07	8.94671e+06	9.20802e+06	1.84287e+07	1.3421e+07	1.57674e+07	1.03285e+07	9.22868e+06	9.12857e+06	1.09611e+07	1.29962e+07	1.30282e+07	1.34741e+07	1.38826e+07	8.18064e+06	1.31703e+07	8.78846e+06	9.12114e+06	1.60866e+07	1.38943e+07	1.58824e+07	GO:0016887, GO:0005524	atr:18426511||http://www.genome.jp/dbget-bin/www_bget?atr:18426511	Endocytosis
G7IH13	Translation elongation factor EF-2 subunit	11406801	Translation elongation factor EF-2 subunit OS=Medicago truncatula OX=3880 GN=11406801 PE=3 SV=1	0	301.415	36	32	260	6	843	94.1	6.11	734.15	0	1	2.74744e+07	2.80008e+07	2.93305e+07	2.59001e+07	2.35853e+07	2.44697e+07	2.40708e+07	2.44205e+07	2.42983e+07	2.37043e+07	2.46809e+07	2.42156e+07	2.5239e+07	2.6239e+07	2.56855e+07	2.89908e+07	3.1197e+07	3.3103e+07	2.8736e+07	2.44544e+07	2.62303e+07	2.46467e+07	2.40872e+07	2.27762e+07	2.33351e+07	2.2641e+07	2.22336e+07	2.57674e+07	2.7003e+07	2.62002e+07	GO:0003924, GO:0005525	atr:18443118||http://www.genome.jp/dbget-bin/www_bget?atr:18443118	---
Q1SKX2	70 kDa heat shock protein	11433850	70 kDa heat shock protein OS=Medicago truncatula OX=3880 GN=11433850 PE=3 SV=1	0	301.401	44	30	310	29	707	75.7	5.34	827.31	1	1	1.00543e+08	1.07146e+08	1.03525e+08	1.31084e+08	1.31454e+08	1.40177e+08	1.30122e+08	1.34075e+08	1.3271e+08	1.27329e+08	1.44842e+08	1.47128e+08	3.81533e+08	3.70061e+08	3.63019e+08	1.1127e+08	1.14288e+08	1.1451e+08	1.33076e+08	1.38558e+08	1.47191e+08	1.32543e+08	1.36259e+08	1.27326e+08	1.33413e+08	1.33681e+08	1.37035e+08	3.4566e+08	3.3568e+08	3.36156e+08	GO:0006457, GO:0051082, GO:0005524, GO:0016887	atr:18448346||http://www.genome.jp/dbget-bin/www_bget?atr:18448346	Endocytosis
A0A072V9Z1	(S)-2-hydroxy-acid oxidase	MTR_2g070420	(S)-2-hydroxy-acid oxidase OS=Medicago truncatula OX=3880 GN=MTR_2g070420 PE=3 SV=1	0	301.162	62	17	406	15	372	40.8	9.13	1261.2	3	1	2.04455e+08	2.16008e+08	2.01842e+08	2.73605e+08	2.49127e+08	2.63032e+08	2.50904e+08	2.54523e+08	1.76069e+08	2.4023e+08	1.93503e+08	1.92374e+08	4.52385e+08	3.77143e+08	4.23597e+08	1.99328e+08	2.05601e+08	1.94323e+08	2.50457e+08	2.48915e+08	2.58017e+08	2.39177e+08	2.54282e+08	1.69992e+08	2.41438e+08	1.88613e+08	1.89016e+08	4.43486e+08	3.84283e+08	4.29561e+08	GO:0003824, GO:0010181, GO:0016491	atr:18427326||http://www.genome.jp/dbget-bin/www_bget?atr:18427326	Peroxisome
G7LIZ2	Lipoxygenase	11428618	Lipoxygenase OS=Medicago truncatula OX=3880 GN=11428618 PE=3 SV=1	0	298.664	31	26	334	13	865	96.6	6.67	1014.63	19	1	2.89e+08	3.06534e+08	3.29994e+08	1.86572e+08	1.90017e+08	1.81606e+08	1.65298e+08	1.65205e+08	1.67066e+08	1.65416e+08	1.80402e+08	1.68635e+08	2.68426e+08	2.67238e+08	2.65474e+08	3.09469e+08	3.01079e+08	3.21678e+08	1.72298e+08	1.73574e+08	1.68378e+08	1.50357e+08	1.52104e+08	1.55858e+08	1.49092e+08	1.64219e+08	1.6353e+08	2.64507e+08	2.70749e+08	2.61167e+08	GO:0005515, GO:0016491, GO:0046872, GO:0016702	atr:18439893||http://www.genome.jp/dbget-bin/www_bget?atr:18439893	---
G7ITZ5	Aconitate hydratase	11416041	Aconitate hydratase OS=Medicago truncatula OX=3880 GN=11416041 PE=3 SV=1	0	294.59	42	37	287	18	979	107	7.72	821.53	25	1	1.19673e+08	1.00927e+08	1.04429e+08	1.06586e+08	1.2056e+08	1.18012e+08	1.28155e+08	1.29498e+08	1.01339e+08	1.26675e+08	1.02349e+08	1.04661e+08	1.65649e+08	1.62103e+08	1.60197e+08	1.11459e+08	1.07525e+08	1.09104e+08	1.13624e+08	1.20181e+08	1.24419e+08	1.28465e+08	1.26129e+08	1.16465e+08	1.26312e+08	1.15503e+08	1.20745e+08	1.68397e+08	1.67207e+08	1.66094e+08	---	atr:18424196||http://www.genome.jp/dbget-bin/www_bget?atr:18424196	2-Oxocarboxylic acid metabolism
G7K882	Phosphoribulokinase	11412336	Phosphoribulokinase OS=Medicago truncatula OX=3880 GN=11412336 PE=3 SV=1	0	286.717	58	18	291	18	411	45.7	7.12	945.59	0	1	9.96578e+07	1.11494e+08	1.10689e+08	1.24491e+08	1.16065e+08	1.23423e+08	1.16256e+08	1.1763e+08	1.06872e+08	1.1578e+08	1.11231e+08	1.13949e+08	2.81542e+08	2.11022e+08	2.49828e+08	8.66514e+07	9.71816e+07	9.59958e+07	1.01712e+08	9.83454e+07	1.0718e+08	1.05554e+08	1.08014e+08	8.50438e+07	1.02242e+08	9.14235e+07	9.62142e+07	2.85552e+08	2.11146e+08	2.52714e+08	GO:0005975, GO:0016301, GO:0005524, GO:0008974	atr:18443858||http://www.genome.jp/dbget-bin/www_bget?atr:18443858	Carbon metabolism
G7JWW6	UDP-arabinopyranose mutase	11433134	UDP-arabinopyranose mutase OS=Medicago truncatula OX=3880 GN=11433134 PE=2 SV=1	0	285.59	56	18	211	9	362	41.2	6.07	719.74	4	1	1.46219e+08	1.22463e+08	1.45448e+08	7.47326e+07	8.34032e+07	7.49045e+07	7.3951e+07	7.23741e+07	1.41133e+08	7.7392e+07	1.36501e+08	1.33942e+08	5.57534e+07	5.71723e+07	5.56672e+07	1.37664e+08	1.37761e+08	1.59503e+08	7.60813e+07	7.66819e+07	6.99009e+07	7.32836e+07	7.00158e+07	1.4835e+08	7.2019e+07	1.34456e+08	1.34956e+08	5.11237e+07	5.26304e+07	5.14461e+07	GO:0016866, GO:0071669	atr:18446216||http://www.genome.jp/dbget-bin/www_bget?atr:18446216	Amino sugar and nucleotide sugar metabolism
G7JK03	Serine/Threonine kinase, plant-type protein, putative	11446209	Serine/Threonine kinase, plant-type protein, putative OS=Medicago truncatula OX=3880 GN=11446209 PE=4 SV=2	0	282.473	42	19	251	19	460	51.2	8.15	925.64	0	1	8.93972e+08	7.84242e+08	9.11132e+08	4.76856e+08	5.45346e+08	5.4172e+08	5.05985e+08	4.80305e+08	9.87593e+08	5.31099e+08	9.19732e+08	8.55673e+08	2.29734e+08	2.25643e+08	2.32453e+08	8.77506e+08	8.05901e+08	9.13797e+08	5.16483e+08	5.82829e+08	5.7831e+08	5.64275e+08	5.24955e+08	1.07121e+09	5.44233e+08	9.2504e+08	9.08565e+08	2.34869e+08	2.28901e+08	2.41523e+08	---	atr:18444976||http://www.genome.jp/dbget-bin/www_bget?atr:18444976	---
A0A072VAE0	Lipoxygenase	25489617	Lipoxygenase OS=Medicago truncatula OX=3880 GN=25489617 PE=3 SV=1	0	280.302	41	34	304	32	858	97.3	6.55	888.7	5	1	2.23514e+08	2.07504e+08	2.20297e+08	1.7706e+08	1.84555e+08	1.81291e+08	1.83097e+08	1.83794e+08	1.63182e+08	1.78823e+08	1.62738e+08	1.67455e+08	2.52038e+08	2.60935e+08	2.45279e+08	2.22227e+08	2.42207e+08	2.52641e+08	1.85651e+08	1.83838e+08	1.84633e+08	1.75501e+08	1.72076e+08	1.71233e+08	1.73688e+08	1.7328e+08	1.77015e+08	2.60796e+08	2.62026e+08	2.55295e+08	GO:0016702, GO:0005515, GO:0016491, GO:0046872	atr:18439893||http://www.genome.jp/dbget-bin/www_bget?atr:18439893	---
A0A072VDP0	Multi-copper oxidase-like protein	25490285	Multi-copper oxidase-like protein OS=Medicago truncatula OX=3880 GN=25490285 PE=3 SV=1	0	275.196	34	14	290	12	544	60.3	9.39	1037.73	2	1	5.30084e+08	4.4735e+08	5.24316e+08	2.32412e+08	2.56263e+08	2.24042e+08	2.50096e+08	2.3852e+08	3.47308e+08	2.54218e+08	3.23682e+08	3.19667e+08	1.58271e+08	1.6205e+08	1.59832e+08	5.307e+08	4.62451e+08	5.3351e+08	2.35828e+08	2.67719e+08	2.37304e+08	2.54706e+08	2.5357e+08	3.59752e+08	2.56906e+08	3.43873e+08	3.28488e+08	1.64279e+08	1.68077e+08	1.6677e+08	GO:0016491, GO:0005507	atr:18445747||http://www.genome.jp/dbget-bin/www_bget?atr:18445747	---
I3SKN7	RuBisCO large subunit-binding protein	25492419	RuBisCO large subunit-binding protein OS=Medicago truncatula OX=3880 GN=25492419 PE=2 SV=1	0	272.944	52	27	210	26	587	61.9	5.16	622.14	1	1	6.50156e+07	7.37379e+07	6.91947e+07	9.91224e+07	9.60325e+07	1.0448e+08	1.02969e+08	1.0367e+08	7.32071e+07	9.79526e+07	8.25163e+07	8.47536e+07	2.60655e+08	2.53004e+08	2.4874e+08	7.49257e+07	8.17513e+07	7.56917e+07	1.00207e+08	1.03259e+08	1.0799e+08	1.10471e+08	1.11266e+08	9.12311e+07	1.06434e+08	1.02095e+08	9.04358e+07	2.30688e+08	2.25941e+08	2.22694e+08	GO:0016887, GO:0005524, GO:0006457, GO:0042026	atr:18422738||http://www.genome.jp/dbget-bin/www_bget?atr:18422738	---
A0A072UDY2	Presequence protease	25494464	Presequence protease OS=Medicago truncatula OX=3880 GN=25494464 PE=3 SV=1	0	268.787	38	39	173	39	1077	120.6	5.55	499.76	0	1	5.95949e+07	5.82119e+07	6.11202e+07	5.28253e+07	5.16577e+07	5.13611e+07	5.2569e+07	5.25409e+07	4.92646e+07	5.21733e+07	5.24033e+07	5.38463e+07	1.3019e+08	1.07152e+08	1.17149e+08	6.55562e+07	6.34182e+07	6.62761e+07	6.06492e+07	6.04882e+07	6.18491e+07	5.94336e+07	6.03184e+07	5.63069e+07	5.88662e+07	5.8167e+07	5.88656e+07	1.02876e+08	9.735e+07	9.82284e+07	GO:0046872, GO:0006508	atr:18425114||http://www.genome.jp/dbget-bin/www_bget?atr:18425114	---
A0A072URM9	V-ATPase 69 kDa subunit	25491171	V-ATPase 69 kDa subunit OS=Medicago truncatula OX=3880 GN=25491171 PE=3 SV=1	0	268.378	47	29	167	29	624	68.7	5.34	504.08	0	1	6.71628e+07	7.68339e+07	7.38112e+07	7.42149e+07	6.52272e+07	6.85676e+07	7.01739e+07	6.98063e+07	7.65001e+07	7.05737e+07	7.82068e+07	8.04166e+07	1.30364e+08	1.27181e+08	1.26669e+08	7.05485e+07	7.60369e+07	7.4399e+07	7.58839e+07	6.90457e+07	7.38555e+07	7.07418e+07	6.87837e+07	7.93211e+07	7.25061e+07	8.00515e+07	8.13455e+07	1.35602e+08	1.07323e+08	1.23857e+08	GO:0046034, GO:0046961, GO:0005524, GO:1902600, GO:0033180	atr:18440712||http://www.genome.jp/dbget-bin/www_bget?atr:18440712	Phagosome
G7IT85	Phosphoglycerate kinase	11421966	Phosphoglycerate kinase OS=Medicago truncatula OX=3880 GN=11421966 PE=3 SV=1	0	266.943	48	22	411	20	479	50	7.14	1261.3	2	1	3.674e+08	3.81193e+08	3.69045e+08	5.43419e+08	5.79119e+08	6.37903e+08	5.67839e+08	5.99034e+08	3.32141e+08	5.39478e+08	3.49668e+08	3.6079e+08	8.88676e+08	7.93338e+08	8.42286e+08	3.63906e+08	4.07513e+08	4.16625e+08	5.76191e+08	5.90611e+08	6.69068e+08	5.8701e+08	5.68987e+08	3.90941e+08	5.63091e+08	4.00263e+08	4.05295e+08	8.88169e+08	7.69859e+08	8.27845e+08	GO:0006096, GO:0004618	atr:18448088||http://www.genome.jp/dbget-bin/www_bget?atr:18448088	Glycolysis / Gluconeogenesis
G7JW95	Ferredoxin--NADP reductase, chloroplastic	11418744	Ferredoxin--NADP reductase, chloroplastic OS=Medicago truncatula OX=3880 GN=11418744 PE=3 SV=1	0	265.549	48	18	208	18	361	40.3	8.21	695.45	0	1	9.0584e+07	9.90643e+07	9.74004e+07	9.41107e+07	9.45201e+07	9.52953e+07	9.46899e+07	9.17498e+07	9.74462e+07	9.57598e+07	1.08589e+08	1.12241e+08	4.23575e+08	3.53012e+08	3.81808e+08	9.32173e+07	1.02825e+08	1.00061e+08	1.0232e+08	1.03475e+08	1.07736e+08	1.01558e+08	1.03535e+08	9.45661e+07	9.51907e+07	1.04473e+08	1.09067e+08	4.12628e+08	3.145e+08	3.72367e+08	GO:0016491	atr:18434346||http://www.genome.jp/dbget-bin/www_bget?atr:18434346	Photosynthesis
G7JYY7	Glutamate-glyoxylate aminotransferase	11409437	Glutamate-glyoxylate aminotransferase OS=Medicago truncatula OX=3880 GN=11409437 PE=4 SV=1	0	265.004	41	17	203	17	481	53.7	6.04	630.34	0	1	1.66009e+08	1.21712e+08	1.2953e+08	1.18786e+08	1.65805e+08	1.58257e+08	1.52082e+08	1.57941e+08	1.1191e+08	1.48461e+08	1.13653e+08	1.14745e+08	1.64913e+08	1.45266e+08	1.55316e+08	1.58007e+08	1.27797e+08	1.34509e+08	1.21097e+08	1.64404e+08	1.60609e+08	1.54289e+08	1.59409e+08	1.07962e+08	1.48787e+08	1.09051e+08	1.09487e+08	1.81572e+08	1.45294e+08	1.63344e+08	GO:0008483, GO:0009058, GO:0003824, GO:0030170	atr:18430615||http://www.genome.jp/dbget-bin/www_bget?atr:18430615	Arginine biosynthesis
G7JUD3	Plasma membrane ATPase	11445796	Plasma membrane ATPase OS=Medicago truncatula OX=3880 GN=11445796 PE=3 SV=1	0	261.922	34	32	179	19	952	104.9	6.95	510.13	15	1	5.43025e+07	5.67465e+07	5.47652e+07	6.30886e+07	6.48472e+07	6.74193e+07	6.15155e+07	6.32836e+07	6.05916e+07	6.05402e+07	6.18708e+07	6.17917e+07	9.27272e+07	8.39144e+07	9.01893e+07	4.95889e+07	5.18055e+07	4.89698e+07	6.34167e+07	6.44679e+07	6.75739e+07	6.5043e+07	6.53739e+07	6.09813e+07	6.45522e+07	6.23348e+07	6.20526e+07	9.9689e+07	9.32271e+07	9.792e+07	GO:0016021, GO:0140603, GO:0008553, GO:0005215, GO:0120029, GO:0000166, GO:0005524	atr:18435577||http://www.genome.jp/dbget-bin/www_bget?atr:18435577	Oxidative phosphorylation
I3S8V0	Putative NAD(P)-binding domain-containing protein	25499634	Putative NAD(P)-binding domain-containing protein OS=Medicago truncatula OX=3880 GN=25499634 PE=2 SV=1	0	259.158	43	16	162	16	378	42	7.96	567.17	0	1	1.04981e+08	1.13029e+08	1.08647e+08	1.39761e+08	1.45236e+08	1.56714e+08	1.3572e+08	1.42024e+08	1.11897e+08	1.37795e+08	1.19498e+08	1.21959e+08	2.42064e+08	2.18206e+08	2.26397e+08	1.01387e+08	1.09381e+08	1.0704e+08	1.3717e+08	1.49604e+08	1.59719e+08	1.46635e+08	1.46859e+08	1.13062e+08	1.39874e+08	1.18052e+08	1.17814e+08	2.39796e+08	2.18177e+08	2.25166e+08	GO:0003824	atr:18431417||http://www.genome.jp/dbget-bin/www_bget?atr:18431417	---
B7FJ16	Oxygen-evolving enhancer protein 2	25490561	Oxygen-evolving enhancer protein 2 OS=Medicago truncatula OX=3880 GN=25490561 PE=2 SV=1	0	254.953	56	13	229	12	261	28.1	7.84	780.31	1	1	1.07616e+08	1.19302e+08	1.23005e+08	1.07091e+08	9.79576e+07	1.0073e+08	9.36654e+07	9.50762e+07	8.90366e+07	9.29122e+07	1.01551e+08	1.05827e+08	4.11507e+08	2.9387e+08	3.56791e+08	9.99355e+07	1.13405e+08	1.18098e+08	1.01129e+08	9.25526e+07	1.01394e+08	9.26686e+07	9.00677e+07	9.08738e+07	8.92722e+07	1.02586e+08	1.10029e+08	3.61196e+08	3.01102e+08	3.27125e+08	GO:0015979, GO:0009654, GO:0005509, GO:0019898, GO:0009523	atr:18433406||http://www.genome.jp/dbget-bin/www_bget?atr:18433406	Photosynthesis
A0A072V8Q4	S-adenosylmethionine synthase	25486640	S-adenosylmethionine synthase OS=Medicago truncatula OX=3880 GN=25486640 PE=3 SV=1	0	254.901	64	21	255	4	396	43.1	6.18	798.53	23	1	2.1468e+08	2.03964e+08	2.17462e+08	2.00139e+08	2.10801e+08	2.20098e+08	2.12487e+08	2.08873e+08	1.97541e+08	2.05878e+08	1.94662e+08	1.90842e+08	1.93601e+08	1.91546e+08	1.91078e+08	2.08873e+08	2.10364e+08	2.22375e+08	2.08477e+08	2.16187e+08	2.27255e+08	2.15294e+08	2.1121e+08	2.02546e+08	2.03448e+08	1.99187e+08	1.95479e+08	2.00819e+08	1.94835e+08	1.97904e+08	GO:0005524, GO:0006556, GO:0004478	atr:18430082||http://www.genome.jp/dbget-bin/www_bget?atr:18430082	Cysteine and methionine metabolism
G7JAX4	Actin 2	11431140	Actin 2 OS=Medicago truncatula OX=3880 GN=11431140 PE=2 SV=2	0	254.482	59	16	259	5	377	41.7	5.49	792.92	0	1	9.00597e+07	7.87659e+07	8.82143e+07	8.89968e+07	1.06555e+08	1.08911e+08	1.02124e+08	1.0985e+08	5.40747e+07	1.06599e+08	5.78675e+07	5.84448e+07	1.28459e+08	1.31367e+08	1.25108e+08	9.0856e+07	7.87934e+07	8.87271e+07	8.96705e+07	1.08139e+08	1.11778e+08	1.02249e+08	1.07103e+08	4.95921e+07	1.02126e+08	5.66191e+07	5.61022e+07	1.23118e+08	1.22836e+08	1.2028e+08	---	atr:18444298||http://www.genome.jp/dbget-bin/www_bget?atr:18444298	---
G7JCF5	Protein TOC75	11414879	Protein TOC75 OS=Medicago truncatula OX=3880 GN=11414879 PE=4 SV=1	0	247.824	37	21	138	21	804	88	7.37	433.57	0	1	7.75546e+07	8.28482e+07	8.19055e+07	8.25616e+07	7.81624e+07	8.01857e+07	7.97034e+07	7.89472e+07	8.674e+07	7.87903e+07	9.3545e+07	7.59702e+07	7.77217e+07	8.11119e+07	7.8641e+07	8.01445e+07	8.35121e+07	8.25079e+07	8.80108e+07	8.30555e+07	8.67075e+07	8.41523e+07	8.23009e+07	8.2807e+07	8.14609e+07	8.48013e+07	8.33865e+07	8.11684e+07	8.29997e+07	8.27747e+07	GO:0019867, GO:0015450, GO:0006886	atr:18436212||http://www.genome.jp/dbget-bin/www_bget?atr:18436212	---
A0A072VL94	Glutathione reductase	25484346	Glutathione reductase OS=Medicago truncatula OX=3880 GN=25484346 PE=3 SV=1	0	246.127	43	20	242	20	553	59.4	7.27	812.5	0	1	5.93617e+08	4.48312e+08	5.32611e+08	2.79864e+08	3.62142e+08	3.32183e+08	3.1209e+08	3.2066e+08	2.47516e+08	2.89399e+08	2.48662e+08	2.35231e+08	1.77595e+08	1.85711e+08	1.82045e+08	5.81302e+08	5.4096e+08	6.17844e+08	3.02612e+08	3.6383e+08	3.25784e+08	2.76234e+08	2.88168e+08	2.57866e+08	2.67611e+08	2.57729e+08	2.50976e+08	1.96586e+08	2.01356e+08	2.03489e+08	GO:0050661, GO:0006749, GO:0045454, GO:0016491, GO:0050660, GO:0004362, GO:0016668	atr:18429513||http://www.genome.jp/dbget-bin/www_bget?atr:18429513	Glutathione metabolism
A0A072TW18	H(+)-transporting two-sector ATPase	MTR_0002s0650	H(+)-transporting two-sector ATPase OS=Medicago truncatula OX=3880 GN=MTR_0002s0650 PE=3 SV=1	0	245.988	29	15	423	1	596	64.5	5.34	1266.62	0	1	1.35953e+06	1.86639e+06	1.69209e+06	1.97928e+06	1.63686e+06	1.83068e+06	1.85102e+06	1.77021e+06	1.98013e+06	1.74279e+06	2.10621e+06	1.86809e+06	1.43933e+06	1.50293e+06	1.48009e+06	1.18635e+06	1.55734e+06	1.4596e+06	2.04895e+06	1.62662e+06	1.92706e+06	1.7509e+06	1.85133e+06	2.07414e+06	1.7343e+06	2.03784e+06	1.87159e+06	1.36012e+06	1.37311e+06	1.40635e+06	GO:0005524, GO:0015986, GO:1902600, GO:0046933, GO:0045261, GO:0046034	atr:2546496|atpB, AmtrCp029|http://www.genome.jp/dbget-bin/www_bget?atr:2546496	Photosynthesis
A0A072UGG8	Heat shock 70 kDa protein	25491393	Heat shock 70 kDa protein OS=Medicago truncatula OX=3880 GN=25491393 PE=4 SV=1	0	244.525	36	26	131	18	851	93.7	5.25	415.9	11	1	8.16708e+07	7.23849e+07	7.63774e+07	6.82366e+07	7.55834e+07	7.42891e+07	7.8062e+07	7.86632e+07	8.08296e+07	7.71432e+07	7.86364e+07	7.45362e+07	8.41751e+07	7.42867e+07	7.76821e+07	7.54109e+07	7.23591e+07	7.36094e+07	7.29753e+07	8.03838e+07	8.12681e+07	8.54919e+07	8.52183e+07	7.61543e+07	8.33573e+07	7.48051e+07	7.50966e+07	8.85378e+07	8.30846e+07	8.62047e+07	GO:0016887, GO:0005524	atr:18432069||http://www.genome.jp/dbget-bin/www_bget?atr:18432069	---
A0A072VKP7	ATPase, AAA-type, CDC48 protein	25483983	ATPase, AAA-type, CDC48 protein OS=Medicago truncatula OX=3880 GN=25483983 PE=4 SV=1	0	243.463	41	30	164	4	810	89.7	5.19	489.68	0	1	276712	331496	290919	389019	354588	357653	403051	451846	325488	406909	358022	355235	387131	390353	386208	245255	254115	221548	301367	307878	316428	315064	319645	269532	380280	286009	275831	515822	558766	526020	GO:0016887, GO:0005524, GO:0016787	atr:18426439||http://www.genome.jp/dbget-bin/www_bget?atr:18426439	Protein processing in endoplasmic reticulum
G7KPU0	Elongation factor Ts, mitochondrial	11427581	Elongation factor Ts, mitochondrial OS=Medicago truncatula OX=3880 GN=11427581 PE=3 SV=1	0	241.826	24	29	185	26	1054	114.5	4.84	480.04	3	1	5.74592e+07	5.67264e+07	5.61264e+07	6.68298e+07	6.83987e+07	7.20052e+07	6.88187e+07	6.98141e+07	5.42831e+07	6.84765e+07	5.72057e+07	5.79811e+07	1.12764e+08	1.11605e+08	1.11645e+08	5.65805e+07	5.58389e+07	5.61093e+07	6.92352e+07	7.20742e+07	7.68955e+07	6.61351e+07	6.71416e+07	5.44609e+07	6.40629e+07	5.60033e+07	5.71235e+07	1.12915e+08	1.06861e+08	1.10218e+08	GO:0005515, GO:0003676, GO:0003746, GO:0006414	atr:18426703||http://www.genome.jp/dbget-bin/www_bget?atr:18426703	---
A0A072U3V6	Pectinesterase	25499611	Pectinesterase OS=Medicago truncatula OX=3880 GN=25499611 PE=3 SV=1	0	238.808	27	14	186	13	557	61	8.91	657.21	1	1	2.74339e+08	2.87435e+08	2.92137e+08	1.93023e+08	1.76881e+08	1.6558e+08	1.60614e+08	1.54364e+08	2.41119e+08	1.55816e+08	2.56965e+08	2.01333e+08	1.07158e+08	1.1088e+08	1.10905e+08	2.81065e+08	2.96686e+08	3.05222e+08	1.90797e+08	1.81588e+08	1.73605e+08	1.57801e+08	1.53143e+08	2.34111e+08	1.54693e+08	2.39882e+08	1.9876e+08	1.05683e+08	1.06691e+08	1.10634e+08	GO:0004857, GO:0030599, GO:0042545	atr:18431298||http://www.genome.jp/dbget-bin/www_bget?atr:18431298	Pentose and glucuronate interconversions
B7FJC8	Uncharacterized protein		Uncharacterized protein OS=Medicago truncatula OX=3880 PE=2 SV=1	0	238.384	61	17	247	7	377	41.6	5.49	763.02	17	1	1.22538e+08	1.21096e+08	1.27794e+08	1.14119e+08	1.16932e+08	1.20176e+08	1.11285e+08	1.1268e+08	8.64741e+07	1.0983e+08	9.35865e+07	9.71974e+07	1.92562e+08	2.00507e+08	1.87442e+08	1.3822e+08	1.36435e+08	1.43954e+08	1.24399e+08	1.29561e+08	1.38318e+08	1.27883e+08	1.22382e+08	1.01238e+08	1.14471e+08	1.01814e+08	1.02429e+08	1.7201e+08	1.76812e+08	1.72765e+08	---	atr:18444298||http://www.genome.jp/dbget-bin/www_bget?atr:18444298	---
G7JML2	Glyceraldehyde-3-phosphate dehydrogenase	11407960	Glyceraldehyde-3-phosphate dehydrogenase OS=Medicago truncatula OX=3880 GN=11407960 PE=3 SV=1	0	236.967	68	21	332	7	339	36.6	7.05	918.75	21	1	3.85692e+08	3.99142e+08	4.18525e+08	4.06395e+08	4.0512e+08	4.20746e+08	3.5012e+08	3.56847e+08	3.24704e+08	3.35813e+08	3.47128e+08	3.27471e+08	6.143e+08	5.9891e+08	5.93431e+08	3.87371e+08	3.87924e+08	4.08649e+08	3.89537e+08	3.91857e+08	4.13151e+08	3.49928e+08	3.50593e+08	3.06871e+08	3.33045e+08	3.3059e+08	3.14657e+08	6.31093e+08	6.22189e+08	6.15273e+08	GO:0050661, GO:0016620, GO:0051287, GO:0006006	atr:18443315||http://www.genome.jp/dbget-bin/www_bget?atr:18443315	Glycolysis / Gluconeogenesis
A0A072UPP0	Elongation factor G, mitochondrial	11405549	Elongation factor G, mitochondrial OS=Medicago truncatula OX=3880 GN=11405549 PE=3 SV=1	0	236.175	34	22	164	22	742	81.9	5.71	540.04	0	1	6.67041e+07	6.87595e+07	6.87783e+07	8.84806e+07	8.48006e+07	8.98356e+07	8.58187e+07	8.57514e+07	7.11589e+07	8.27324e+07	7.45014e+07	7.48168e+07	1.18232e+08	1.19805e+08	1.16588e+08	7.06823e+07	7.92866e+07	7.63025e+07	9.98955e+07	9.06013e+07	9.8329e+07	8.57445e+07	8.81036e+07	8.38797e+07	8.24681e+07	8.67462e+07	8.69572e+07	1.10713e+08	1.10153e+08	1.10642e+08	GO:0005525, GO:0006414, GO:0003746, GO:0003924	atr:18437397||http://www.genome.jp/dbget-bin/www_bget?atr:18437397	---
A4PU48	S-adenosylmethionine synthase	METK	S-adenosylmethionine synthase OS=Medicago truncatula OX=3880 GN=METK PE=3 SV=1	0	235.925	64	20	253	9	394	43.3	5.94	788.39	0	1	5.83333e+07	6.49079e+07	6.55385e+07	6.60115e+07	6.20092e+07	6.51971e+07	5.75252e+07	5.61568e+07	5.41445e+07	5.49172e+07	5.32332e+07	5.36171e+07	8.09854e+07	5.18903e+07	6.81389e+07	5.8909e+07	6.14247e+07	6.60197e+07	5.98611e+07	6.07335e+07	6.43521e+07	5.66713e+07	5.82002e+07	5.11532e+07	5.46337e+07	5.0501e+07	4.96485e+07	6.63756e+07	5.36016e+07	6.19015e+07	GO:0005524, GO:0006556, GO:0004478	atr:18430082||http://www.genome.jp/dbget-bin/www_bget?atr:18430082	Cysteine and methionine metabolism
G7KIR1	Carbonic anhydrase	11428425	Carbonic anhydrase OS=Medicago truncatula OX=3880 GN=11428425 PE=3 SV=1	0	235.063	55	11	263	10	260	28.2	6.54	957.94	2	1	4.02114e+08	3.03521e+08	3.18321e+08	4.22069e+08	6.60854e+08	6.42374e+08	7.43266e+08	7.78343e+08	3.98163e+08	7.07281e+08	3.79084e+08	4.03434e+08	5.38626e+08	5.19995e+08	5.06887e+08	4.027e+08	2.96167e+08	3.24023e+08	4.07833e+08	6.50789e+08	6.472e+08	7.31164e+08	7.70502e+08	4.038e+08	7.33757e+08	3.60916e+08	3.8722e+08	5.32645e+08	4.84262e+08	4.93844e+08	GO:0015976, GO:0008270, GO:0004089	atr:18434862||http://www.genome.jp/dbget-bin/www_bget?atr:18434862	Nitrogen metabolism
A0A072UQU8	ATP-dependent zinc metalloprotease FTSH protein	25493413	ATP-dependent zinc metalloprotease FTSH protein OS=Medicago truncatula OX=3880 GN=25493413 PE=3 SV=1	0	234.863	46	24	150	14	694	74.5	5.57	422.21	13	1	4.81079e+07	5.04598e+07	4.77845e+07	5.92823e+07	5.70723e+07	6.00027e+07	5.69523e+07	6.02359e+07	4.82387e+07	5.81301e+07	5.02618e+07	5.27293e+07	1.22402e+08	1.20359e+08	1.15916e+08	4.84582e+07	5.34979e+07	5.35487e+07	6.46675e+07	6.17781e+07	6.84312e+07	6.54972e+07	6.84425e+07	6.14425e+07	6.44185e+07	6.10823e+07	6.20027e+07	1.03862e+08	1.07718e+08	1.03806e+08	GO:0016020, GO:0004176, GO:0016887, GO:0005524, GO:0006508, GO:0004222	atr:18428801||http://www.genome.jp/dbget-bin/www_bget?atr:18428801	---
G7KU92	Putative tripeptidyl-peptidase II	11436744	Putative tripeptidyl-peptidase II OS=Medicago truncatula OX=3880 GN=11436744 PE=3 SV=1	0	230.675	19	13	233	9	800	86.5	9.33	793.08	7	1	9.04194e+08	6.32078e+08	8.13357e+08	3.61466e+08	4.9938e+08	4.4014e+08	3.56319e+08	3.7695e+08	2.47216e+08	3.20775e+08	2.49894e+08	2.37968e+08	1.69309e+08	1.58392e+08	1.73061e+08	9.53988e+08	6.45358e+08	8.25899e+08	3.65489e+08	4.99693e+08	4.51332e+08	3.51152e+08	3.75158e+08	2.6239e+08	3.40017e+08	2.60088e+08	2.44815e+08	1.57141e+08	1.56375e+08	1.66275e+08	GO:0006508, GO:0008236, GO:0004252	atr:18447486||http://www.genome.jp/dbget-bin/www_bget?atr:18447486	---
G7LGN1	Drug resistance transporter-like ABC domain protein	11434035	Drug resistance transporter-like ABC domain protein OS=Medicago truncatula OX=3880 GN=11434035 PE=3 SV=2	0	229.394	27	32	148	21	1308	147.1	7.3	433.02	13	1	6.36698e+07	7.11781e+07	6.76573e+07	7.74422e+07	6.75981e+07	7.17979e+07	6.82412e+07	7.20968e+07	7.02168e+07	6.94976e+07	7.19953e+07	7.09114e+07	7.86674e+07	7.38064e+07	7.63659e+07	6.89577e+07	8.24763e+07	8.23411e+07	8.73599e+07	7.22348e+07	7.96203e+07	7.05506e+07	7.07255e+07	7.48812e+07	6.98449e+07	7.55861e+07	7.54391e+07	6.97146e+07	7.00964e+07	7.13846e+07	GO:0005524, GO:0016020, GO:0140359	atr:18443415||http://www.genome.jp/dbget-bin/www_bget?atr:18443415	---
G7ZUV5	Thioredoxin-dependent peroxiredoxin	25499456	Thioredoxin-dependent peroxiredoxin OS=Medicago truncatula OX=3880 GN=25499456 PE=4 SV=1	0	227.776	46	11	238	5	265	29	6.55	842.52	10	1	1.40879e+09	9.77678e+08	1.18641e+09	6.2476e+08	8.40461e+08	7.82823e+08	7.31041e+08	7.32756e+08	3.15678e+08	6.78326e+08	3.30254e+08	3.18142e+08	3.07762e+08	3.03813e+08	3.11337e+08	1.41612e+09	1.01273e+09	1.19347e+09	6.37569e+08	8.35292e+08	7.95663e+08	6.98882e+08	6.99172e+08	3.2904e+08	6.45016e+08	3.52543e+08	3.30007e+08	2.89173e+08	2.92996e+08	3.0282e+08	GO:0051920, GO:0016491, GO:0016209	atr:18444464||http://www.genome.jp/dbget-bin/www_bget?atr:18444464	---
G7KN61	Elongation factor 1-alpha	25495654	Elongation factor 1-alpha OS=Medicago truncatula OX=3880 GN=25495654 PE=3 SV=2	0	227.243	47	18	259	7	447	49.2	9.07	750.9	15	1	4.72441e+08	3.65082e+08	3.95461e+08	3.81646e+08	5.16382e+08	5.07233e+08	4.88894e+08	5.26545e+08	2.64672e+08	4.55316e+08	2.74951e+08	2.77781e+08	6.0995e+08	6.23353e+08	6.07314e+08	4.78668e+08	3.94384e+08	4.15107e+08	3.85467e+08	5.04821e+08	5.09876e+08	5.03489e+08	5.18401e+08	3.1655e+08	4.67047e+08	3.3244e+08	3.29916e+08	6.50832e+08	6.39131e+08	6.411e+08	GO:0006414, GO:0003924, GO:0003746, GO:0005525	atr:18436151||http://www.genome.jp/dbget-bin/www_bget?atr:18436151	RNA transport
A0A072TYG3	Processing peptidase	25498184	Processing peptidase OS=Medicago truncatula OX=3880 GN=25498184 PE=3 SV=1	0	226.721	40	20	156	20	532	59.6	6.93	451.9	0	1	4.90755e+07	4.42025e+07	4.41886e+07	5.28835e+07	5.65603e+07	5.79469e+07	6.13854e+07	6.14442e+07	4.61969e+07	6.0201e+07	4.74604e+07	4.69408e+07	6.57645e+07	6.82115e+07	6.46695e+07	5.39789e+07	4.0351e+07	3.98243e+07	4.8141e+07	6.02312e+07	5.9308e+07	6.07624e+07	6.07732e+07	4.71237e+07	6.13199e+07	4.71126e+07	4.72482e+07	5.54982e+07	5.59413e+07	5.50129e+07	GO:0046872, GO:0006508, GO:0004222	atr:18427948||http://www.genome.jp/dbget-bin/www_bget?atr:18427948	---
A0A072TX38	UDP-arabinopyranose mutase	25497598	UDP-arabinopyranose mutase OS=Medicago truncatula OX=3880 GN=25497598 PE=3 SV=1	0	226.314	55	18	223	8	360	40.7	5.96	673.77	16	1	5.88747e+08	5.35723e+08	6.17718e+08	2.67278e+08	2.84537e+08	2.60321e+08	2.94612e+08	2.83136e+08	4.73819e+08	2.99584e+08	4.29717e+08	4.38074e+08	1.70196e+08	1.69612e+08	1.67389e+08	5.71404e+08	4.77506e+08	5.51721e+08	2.55074e+08	2.98935e+08	2.76741e+08	2.9905e+08	2.89327e+08	4.32177e+08	3.02836e+08	3.92682e+08	4.05645e+08	2.13567e+08	2.16049e+08	2.09808e+08	GO:0071669, GO:0016866	atr:18446216||http://www.genome.jp/dbget-bin/www_bget?atr:18446216	Amino sugar and nucleotide sugar metabolism
I3S3S0	Cytosolic triosephosphate isomerase	25487887	Cytosolic triosephosphate isomerase OS=Medicago truncatula OX=3880 GN=25487887 PE=2 SV=1	0	226.082	50	16	209	15	253	27.2	5.92	773.34	1	1	1.32797e+08	1.45739e+08	1.48117e+08	1.71867e+08	1.78867e+08	1.92154e+08	1.57137e+08	1.67266e+08	1.44397e+08	1.44742e+08	1.53716e+08	1.5653e+08	2.7772e+08	1.81983e+08	2.45191e+08	1.40397e+08	1.45569e+08	1.50767e+08	1.69535e+08	1.68835e+08	1.87253e+08	1.6163e+08	1.65372e+08	1.25113e+08	1.56141e+08	1.3669e+08	1.3413e+08	3.06576e+08	2.21489e+08	2.6313e+08	GO:0006096, GO:0003824, GO:0004807	atr:18436113||http://www.genome.jp/dbget-bin/www_bget?atr:18436113	Inositol phosphate metabolism
A0A072UWD1	Alpha-1,4 glucan phosphorylase	25490769	Alpha-1,4 glucan phosphorylase OS=Medicago truncatula OX=3880 GN=25490769 PE=3 SV=1	0	224.798	27	23	162	23	840	95.4	5.88	501.88	0	1	5.75956e+07	6.41547e+07	6.17645e+07	7.35115e+07	6.83676e+07	7.26539e+07	6.77868e+07	6.89139e+07	6.05834e+07	6.52172e+07	6.31187e+07	6.36178e+07	9.31517e+07	9.86223e+07	9.30155e+07	5.43343e+07	6.11785e+07	5.84606e+07	7.42049e+07	7.26408e+07	7.69069e+07	7.15712e+07	7.21461e+07	5.95759e+07	6.78398e+07	6.32886e+07	6.2784e+07	1.0174e+08	9.73427e+07	9.9765e+07	GO:0005975, GO:0008184, GO:0030170, GO:0004645	atr:18437829||http://www.genome.jp/dbget-bin/www_bget?atr:18437829	Starch and sucrose metabolism
G7KVE1	Actin-97	11425201	Actin-97 OS=Medicago truncatula OX=3880 GN=11425201 PE=3 SV=1	0	220.758	56	16	221	2	377	41.7	5.49	708.25	6	1	3.8505e+07	2.80096e+07	3.03605e+07	2.49519e+07	3.1226e+07	3.07313e+07	3.26648e+07	3.59026e+07	1.97581e+07	3.42417e+07	1.98965e+07	1.95987e+07	2.01391e+07	2.08409e+07	2.0149e+07	3.40836e+07	3.08227e+07	3.13974e+07	2.85428e+07	3.04453e+07	3.0755e+07	3.2667e+07	3.30004e+07	2.41425e+07	3.19423e+07	2.46742e+07	2.43164e+07	2.5645e+07	2.61648e+07	2.586e+07	---	atr:18445425||http://www.genome.jp/dbget-bin/www_bget?atr:18445425	---
G7LH57	Serine hydroxymethyltransferase	11415840	Serine hydroxymethyltransferase OS=Medicago truncatula OX=3880 GN=11415840 PE=2 SV=1	0	218.037	34	16	129	4	471	51.8	7.71	451.1	18	1	9.11758e+07	8.47289e+07	9.06118e+07	6.64307e+07	6.4672e+07	6.30078e+07	6.83778e+07	6.8352e+07	7.30098e+07	6.96762e+07	7.32122e+07	7.25635e+07	7.76621e+07	7.46787e+07	7.45255e+07	9.1976e+07	7.54105e+07	8.26673e+07	6.16899e+07	6.98151e+07	6.71986e+07	7.2746e+07	7.14705e+07	5.47385e+07	7.00763e+07	5.60461e+07	5.48246e+07	7.71419e+07	6.64814e+07	7.45765e+07	GO:0019264, GO:0004372, GO:0030170, GO:0003824, GO:0035999	atr:18438270||http://www.genome.jp/dbget-bin/www_bget?atr:18438270	Cyanoamino acid metabolism
G7JPH8	Photosystem II stability/assembly factor	11439200	Photosystem II stability/assembly factor OS=Medicago truncatula OX=3880 GN=11439200 PE=3 SV=1	0	216.06	43	17	156	17	396	43.7	8.03	544.69	0	1	1.52558e+08	1.20933e+08	1.28058e+08	1.25811e+08	1.66485e+08	1.61161e+08	1.67986e+08	1.77342e+08	1.25026e+08	1.61993e+08	1.18992e+08	1.19981e+08	1.09122e+08	1.09818e+08	1.07726e+08	1.44066e+08	1.19087e+08	1.27149e+08	1.3242e+08	1.61048e+08	1.60016e+08	1.62591e+08	1.71433e+08	1.37256e+08	1.63102e+08	1.28995e+08	1.30567e+08	1.17425e+08	1.20632e+08	1.18703e+08	GO:0005515	atr:18437598||http://www.genome.jp/dbget-bin/www_bget?atr:18437598	---
I3SN66	Uncharacterized protein		Uncharacterized protein OS=Medicago truncatula OX=3880 PE=2 SV=1	0	213.781	54	15	166	14	312	33.4	7.02	609.04	0	1	6.71184e+07	7.43658e+07	7.52967e+07	7.7589e+07	7.60275e+07	7.93865e+07	7.89683e+07	8.0362e+07	7.07346e+07	7.61455e+07	7.19777e+07	7.3509e+07	1.49884e+08	1.16839e+08	1.3701e+08	7.00238e+07	7.78693e+07	7.99184e+07	7.90105e+07	7.48041e+07	8.00169e+07	8.52664e+07	8.77108e+07	7.34734e+07	8.87441e+07	7.44162e+07	7.55813e+07	1.48248e+08	1.15668e+08	1.33462e+08	GO:0003824, GO:0006096, GO:0004807	atr:18441770||http://www.genome.jp/dbget-bin/www_bget?atr:18441770	Inositol phosphate metabolism
G7IH71	Phosphoenolpyruvate carboxylase	11407264	Phosphoenolpyruvate carboxylase OS=Medicago truncatula OX=3880 GN=11407264 PE=3 SV=1	0	213.539	34	31	129	16	966	110.8	6.24	372.04	17	1	3.84507e+07	3.81101e+07	3.88539e+07	4.10096e+07	4.0501e+07	4.22688e+07	4.04271e+07	4.28446e+07	3.429e+07	4.11191e+07	3.54116e+07	3.64586e+07	6.00088e+07	6.10598e+07	5.92119e+07	4.45222e+07	3.95569e+07	4.02731e+07	4.37635e+07	4.50461e+07	4.65388e+07	4.37147e+07	4.50836e+07	3.35468e+07	4.15361e+07	3.49923e+07	3.55633e+07	6.12878e+07	5.77482e+07	5.94128e+07	GO:0006099, GO:0008964, GO:0003824, GO:0015977	atr:18442136||http://www.genome.jp/dbget-bin/www_bget?atr:18442136	Carbon metabolism
A0A126TGR5	ATP synthase subunit alpha	atp1	ATP synthase subunit alpha OS=Medicago truncatula OX=3880 GN=atp1 PE=3 SV=1	0	213.335	48	21	245	2	506	54.9	6.1	687.09	29	1	3.93408e+08	4.43858e+08	4.43853e+08	5.2185e+08	5.19081e+08	5.3501e+08	4.76506e+08	4.89971e+08	2.78164e+08	4.53697e+08	3.12775e+08	2.9438e+08	5.86939e+08	6.14593e+08	5.84601e+08	3.96775e+08	4.20402e+08	4.35817e+08	5.10438e+08	4.99319e+08	5.6837e+08	4.69594e+08	5.02059e+08	2.71247e+08	4.4586e+08	2.97463e+08	2.93253e+08	5.74357e+08	5.84208e+08	5.674e+08	GO:0015986, GO:0005524, GO:0046034, GO:0032559, GO:1902600, GO:0046933, GO:0045261	atr:2546497|atpA, AmtrCp007|http://www.genome.jp/dbget-bin/www_bget?atr:2546497	Photosynthesis
G7IJU2	Peroxidase	11410170	Peroxidase OS=Medicago truncatula OX=3880 GN=11410170 PE=3 SV=2	0	212.775	37	15	325	8	355	38.2	7.55	980.23	14	1	1.18925e+09	7.91659e+08	9.05091e+08	5.35988e+08	6.93678e+08	6.5026e+08	6.53874e+08	6.56027e+08	8.79843e+08	6.62221e+08	8.06047e+08	8.065e+08	2.12359e+08	2.16114e+08	2.18335e+08	1.21599e+09	8.20804e+08	9.43609e+08	5.34226e+08	7.34188e+08	6.8686e+08	6.87433e+08	6.38482e+08	9.69027e+08	7.09658e+08	8.4329e+08	8.4378e+08	1.96439e+08	2.01097e+08	2.04998e+08	GO:0006979, GO:0004601, GO:0042744, GO:0020037	atr:18439310||http://www.genome.jp/dbget-bin/www_bget?atr:18439310	Phenylpropanoid biosynthesis
G7L9S9	Phosphoglucomutase (alpha-D-glucose-1,6-bisphosphate-dependent)	11413693	Phosphoglucomutase (alpha-D-glucose-1,6-bisphosphate-dependent) OS=Medicago truncatula OX=3880 GN=11413693 PE=3 SV=1	0	212.767	37	19	158	18	582	63.2	5.68	506.79	1	1	5.88556e+07	6.0555e+07	5.9995e+07	7.29839e+07	7.1434e+07	7.57189e+07	7.08525e+07	7.14679e+07	5.95043e+07	6.82023e+07	6.0063e+07	5.9969e+07	7.74123e+07	7.98541e+07	7.67331e+07	5.6906e+07	5.94479e+07	6.06052e+07	7.16772e+07	7.07542e+07	7.66003e+07	6.90248e+07	6.83414e+07	6.26434e+07	6.60902e+07	6.13819e+07	6.18494e+07	7.20829e+07	7.3526e+07	7.20469e+07	GO:0005975, GO:0016868, GO:0071704, GO:0000287	atr:18422474||http://www.genome.jp/dbget-bin/www_bget?atr:18422474	Galactose metabolism
G7IT86	Phosphoglycerate kinase	11424739	Phosphoglycerate kinase OS=Medicago truncatula OX=3880 GN=11424739 PE=3 SV=1	0	211.961	57	22	183	7	401	42.4	6.01	559.57	15	1	1.09465e+08	1.07416e+08	1.09569e+08	1.29744e+08	1.40231e+08	1.45202e+08	1.31653e+08	1.33969e+08	9.54716e+07	1.23614e+08	9.76981e+07	1.01807e+08	1.77116e+08	1.80985e+08	1.74607e+08	1.12408e+08	1.12727e+08	1.1125e+08	1.28509e+08	1.42811e+08	1.45528e+08	1.30885e+08	1.34167e+08	9.8486e+07	1.25637e+08	9.97059e+07	1.02563e+08	1.81231e+08	1.37987e+08	1.61798e+08	GO:0006096, GO:0004618	atr:18448088||http://www.genome.jp/dbget-bin/www_bget?atr:18448088	Glycolysis / Gluconeogenesis
I3SU63	Fructose-bisphosphate aldolase	25494828	Fructose-bisphosphate aldolase OS=Medicago truncatula OX=3880 GN=25494828 PE=2 SV=1	0	211.947	48	14	157	5	358	38.2	6.73	570.13	9	1	4.68626e+07	4.62362e+07	4.5963e+07	4.95985e+07	4.98932e+07	5.31169e+07	5.27098e+07	5.19613e+07	4.40786e+07	5.7326e+07	4.86145e+07	5.34331e+07	1.54089e+08	1.57647e+08	1.47333e+08	5.4835e+07	4.67334e+07	4.90444e+07	4.27607e+07	4.80977e+07	4.76909e+07	5.08197e+07	4.9577e+07	4.54557e+07	4.97203e+07	4.76725e+07	4.92751e+07	1.55677e+08	1.51869e+08	1.48657e+08	GO:0006096, GO:0003824, GO:0004332	atr:18441399||http://www.genome.jp/dbget-bin/www_bget?atr:18441399	Fructose and mannose metabolism
G7IBY1	60S ribosomal protein L3B	MTR_1g098540	60S ribosomal protein L3B OS=Medicago truncatula OX=3880 GN=MTR_1g098540 PE=3 SV=2	0	211.56	49	25	234	16	389	44.5	10.18	682.92	10	1	7.33854e+07	8.11978e+07	7.72476e+07	7.54054e+07	7.50513e+07	7.74332e+07	7.65068e+07	7.89703e+07	6.72804e+07	7.64561e+07	7.01045e+07	7.08705e+07	1.28561e+08	1.24742e+08	1.24421e+08	6.54446e+07	6.73958e+07	6.81598e+07	6.87661e+07	7.35455e+07	7.57091e+07	7.50265e+07	7.75354e+07	6.58068e+07	7.49946e+07	6.70676e+07	6.97528e+07	1.30242e+08	1.26399e+08	1.23874e+08	GO:0005840, GO:0003735, GO:0006412	atr:18423839||http://www.genome.jp/dbget-bin/www_bget?atr:18423839	Ribosome
G7L6U5	Germin-like protein	11429465	Germin-like protein OS=Medicago truncatula OX=3880 GN=11429465 PE=2 SV=1	0	210.954	36	7	134	7	208	21.6	8.02	608.33	0	1	1.08222e+09	1.07243e+09	1.10111e+09	9.60684e+08	9.38285e+08	9.26407e+08	8.80202e+08	8.39334e+08	1.33151e+09	8.3296e+08	1.24935e+09	1.12996e+09	3.45168e+08	3.24438e+08	3.34549e+08	1.18993e+09	1.06971e+09	1.1629e+09	9.92123e+08	1.04675e+09	1.03241e+09	9.33615e+08	9.66345e+08	1.49607e+09	9.41588e+08	1.37262e+09	1.21301e+09	3.22381e+08	3.30084e+08	3.18911e+08	GO:0030145	atr:18439437||http://www.genome.jp/dbget-bin/www_bget?atr:18439437	---
Q1RSH4	GroEL-like chaperone, ATPase	11417778	GroEL-like chaperone, ATPase OS=Medicago truncatula OX=3880 GN=11417778 PE=3 SV=1	0	209.144	42	24	112	7	576	61.1	6.62	346.07	0	1	3.11934e+07	2.7616e+07	2.88408e+07	3.02367e+07	3.43005e+07	3.41068e+07	3.453e+07	3.48525e+07	1.99993e+07	3.51984e+07	2.13081e+07	2.28196e+07	5.05046e+07	5.08992e+07	4.92722e+07	2.76562e+07	2.95875e+07	2.90415e+07	3.07585e+07	2.90991e+07	3.08294e+07	3.12245e+07	3.03822e+07	2.78196e+07	3.29183e+07	2.92895e+07	2.96751e+07	5.9875e+07	4.72012e+07	5.46037e+07	GO:0042026, GO:0006457, GO:0016887, GO:0005524	atr:18432542||http://www.genome.jp/dbget-bin/www_bget?atr:18432542	RNA degradation
G7LB83	Alpha-mannosidase	MTR_8g075330	Alpha-mannosidase OS=Medicago truncatula OX=3880 GN=MTR_8g075330 PE=3 SV=1	0	207.995	30	27	130	24	1018	114.1	7.27	389.46	2	1	6.36114e+07	6.33611e+07	6.98333e+07	4.42035e+07	4.64168e+07	4.40619e+07	3.82301e+07	3.78216e+07	4.34359e+07	3.85991e+07	4.3273e+07	4.24113e+07	3.11445e+07	3.18996e+07	3.11431e+07	7.79255e+07	7.15835e+07	7.98415e+07	3.79408e+07	4.0426e+07	3.62958e+07	3.49915e+07	3.34874e+07	4.2087e+07	3.4111e+07	4.12936e+07	4.09279e+07	2.71609e+07	2.74568e+07	2.79132e+07	GO:0004559, GO:0003824, GO:0006013, GO:0030246, GO:0005975	atr:18425707||http://www.genome.jp/dbget-bin/www_bget?atr:18425707	Other glycan degradation
G7KFV7	Isocitrate dehydrogenase [NADP]	11425956	Isocitrate dehydrogenase [NADP] OS=Medicago truncatula OX=3880 GN=11425956 PE=3 SV=1	0	207.53	47	20	189	12	412	46	6.39	516.06	9	1	5.83438e+07	5.49417e+07	5.56543e+07	5.4901e+07	5.57023e+07	5.75715e+07	5.858e+07	5.81137e+07	4.78868e+07	5.82037e+07	5.04415e+07	5.14997e+07	1.00082e+08	9.18666e+07	9.49502e+07	5.51195e+07	5.03099e+07	5.14795e+07	5.75219e+07	6.56458e+07	6.83909e+07	5.82721e+07	6.11538e+07	4.34904e+07	5.67053e+07	4.6082e+07	4.76509e+07	8.99848e+07	9.17712e+07	8.84219e+07	GO:0004450, GO:0016616, GO:0006102, GO:0051287, GO:0000287	atr:18448410||http://www.genome.jp/dbget-bin/www_bget?atr:18448410	Peroxisome
G8A394	Acetyl-CoA carboxylase	25489412	Acetyl-CoA carboxylase OS=Medicago truncatula OX=3880 GN=25489412 PE=4 SV=1	0	207.319	15	31	123	31	2256	251.7	6.27	342.19	0	1	4.08501e+07	4.00137e+07	4.01998e+07	4.52361e+07	4.64791e+07	4.90186e+07	4.88326e+07	4.98859e+07	4.13013e+07	4.87426e+07	4.10928e+07	4.25089e+07	4.86291e+07	5.08469e+07	4.83518e+07	4.41104e+07	4.49087e+07	4.3529e+07	4.53478e+07	4.88516e+07	4.98913e+07	4.87504e+07	4.88826e+07	3.93793e+07	4.86937e+07	4.11877e+07	4.04456e+07	4.9677e+07	4.97226e+07	4.94099e+07	GO:0046872, GO:0003989, GO:0006633, GO:0005524, GO:0016874	atr:18422110||http://www.genome.jp/dbget-bin/www_bget?atr:18422110	Propanoate metabolism
B7FLQ0	Uncharacterized protein		Uncharacterized protein OS=Medicago truncatula OX=3880 PE=2 SV=1	0	206.151	35	21	93	1	541	61.7	4.83	274.15	0	1	2.22832e+06	1.76886e+06	1.91592e+06	1.84212e+06	2.64078e+06	2.40875e+06	2.96012e+06	3.19114e+06	2.16256e+06	3.15739e+06	2.02231e+06	2.009e+06	3.07519e+06	3.05693e+06	2.99379e+06	2.27567e+06	1.53379e+06	1.65605e+06	1.76973e+06	2.36821e+06	2.36305e+06	2.83342e+06	2.97911e+06	2.07101e+06	2.84762e+06	1.94687e+06	2.08963e+06	2.89095e+06	2.50424e+06	2.79966e+06	GO:0005783, GO:0051082, GO:0006457, GO:0005509, GO:0005515	atr:18434560||http://www.genome.jp/dbget-bin/www_bget?atr:18434560	Phagosome
A0A072U201	Elongation factor Tu	25499089	Elongation factor Tu OS=Medicago truncatula OX=3880 GN=25499089 PE=3 SV=1	0	205.653	47	19	135	15	449	48.9	6.87	407.8	3	1	8.48561e+07	8.53768e+07	8.54059e+07	9.68098e+07	9.58621e+07	9.90102e+07	9.05436e+07	9.22081e+07	7.16138e+07	8.67578e+07	7.31828e+07	7.27898e+07	7.89005e+07	8.25893e+07	7.90639e+07	9.12293e+07	8.10315e+07	8.60162e+07	8.79765e+07	1.02237e+08	1.05072e+08	9.39634e+07	9.50105e+07	7.32362e+07	8.99362e+07	7.19812e+07	7.25612e+07	7.11697e+07	7.32493e+07	7.15678e+07	GO:0005525, GO:0006414, GO:0003924, GO:0003746	atr:18440609||http://www.genome.jp/dbget-bin/www_bget?atr:18440609	---
A0A072UJZ2	L-ascorbate peroxidase	11412115	L-ascorbate peroxidase OS=Medicago truncatula OX=3880 GN=11412115 PE=3 SV=1	0	205.313	51	9	172	9	246	26.7	5.99	539.59	0	1	6.88523e+07	7.10151e+07	7.22063e+07	7.35087e+07	6.56046e+07	6.94373e+07	6.44962e+07	6.35917e+07	6.17462e+07	6.55685e+07	6.9012e+07	7.28254e+07	2.13317e+08	1.953e+08	2.01635e+08	7.25664e+07	7.47893e+07	7.5886e+07	7.38259e+07	7.04638e+07	7.48416e+07	6.51763e+07	6.52076e+07	6.74112e+07	6.30037e+07	7.18261e+07	7.39757e+07	1.93489e+08	1.78906e+08	1.84162e+08	GO:0034599, GO:0020037, GO:0004601, GO:0006979	atr:18423687||http://www.genome.jp/dbget-bin/www_bget?atr:18423687	Ascorbate and aldarate metabolism
B7FLD9	Phosphoglycerate mutase (2,3-diphosphoglycerate-independent)	11435852	Phosphoglycerate mutase (2,3-diphosphoglycerate-independent) OS=Medicago truncatula OX=3880 GN=11435852 PE=2 SV=1	0	204.83	38	21	147	21	556	60.6	5.68	460.47	0	1	1.03664e+08	1.05146e+08	1.09029e+08	1.28685e+08	1.34831e+08	1.42403e+08	1.2273e+08	1.2404e+08	8.82277e+07	1.12308e+08	9.09975e+07	8.93899e+07	1.19081e+08	1.24356e+08	1.17695e+08	1.03352e+08	1.02649e+08	1.07024e+08	1.26993e+08	1.38289e+08	1.45623e+08	1.21878e+08	1.30652e+08	7.94888e+07	1.1586e+08	8.51895e+07	8.29568e+07	1.35519e+08	1.33014e+08	1.30604e+08	GO:0006007, GO:0003824, GO:0030145, GO:0005737, GO:0004619, GO:0046872	atr:18432463||http://www.genome.jp/dbget-bin/www_bget?atr:18432463	Glycine, serine and threonine metabolism
Q2HUA3	Phospholipase D	11435279	Phospholipase D OS=Medicago truncatula OX=3880 GN=11435279 PE=3 SV=1	0	204.551	34	24	148	22	809	92	5.8	450.03	4	1	5.63304e+07	5.65391e+07	5.74684e+07	5.94206e+07	5.89573e+07	6.08474e+07	6.06624e+07	6.24314e+07	5.61277e+07	5.79462e+07	5.8447e+07	5.76122e+07	8.16728e+07	8.29496e+07	8.19725e+07	5.69485e+07	6.11562e+07	6.01971e+07	6.75101e+07	6.94993e+07	7.35193e+07	6.80384e+07	6.67954e+07	6.2703e+07	6.38637e+07	6.35502e+07	6.32663e+07	7.6844e+07	7.71656e+07	7.78548e+07	GO:0004630, GO:0005509, GO:0046470, GO:0016020, GO:0003824	atr:18431892||http://www.genome.jp/dbget-bin/www_bget?atr:18431892	Ether lipid metabolism
A0A396JDZ5	Putative maltose-transporting ATPase	MtrunA17_Chr2g0332241	Putative maltose-transporting ATPase OS=Medicago truncatula OX=3880 GN=MtrunA17_Chr2g0332241 PE=3 SV=1	0	203.584	20	27	146	2	1428	160.3	6.86	379.06	31	1	5.609e+07	6.14789e+07	6.10559e+07	6.64339e+07	6.29263e+07	6.64643e+07	6.34712e+07	6.24145e+07	7.56861e+07	6.13985e+07	6.96745e+07	6.8439e+07	4.66732e+07	4.73733e+07	4.63636e+07	5.7915e+07	6.31721e+07	6.27568e+07	6.59784e+07	6.25211e+07	6.71944e+07	6.5164e+07	6.38186e+07	7.20272e+07	6.53745e+07	6.86853e+07	6.8399e+07	5.13791e+07	5.18342e+07	5.19481e+07	GO:0140359, GO:0016020, GO:0005524	atr:18425021||http://www.genome.jp/dbget-bin/www_bget?atr:18425021	---
G7KVS0	Oxoglutarate dehydrogenase (succinyl-transferring)	11443322	Oxoglutarate dehydrogenase (succinyl-transferring) OS=Medicago truncatula OX=3880 GN=11443322 PE=3 SV=2	0	203.094	29	28	187	28	1023	115.7	6.95	511.92	0	1	6.75368e+07	6.03238e+07	6.14346e+07	6.27809e+07	6.27524e+07	6.27729e+07	6.37972e+07	6.51527e+07	5.63745e+07	6.37833e+07	5.83429e+07	5.90405e+07	8.56697e+07	8.81341e+07	8.42219e+07	5.93784e+07	5.87633e+07	5.78433e+07	6.47987e+07	6.11729e+07	6.39532e+07	6.28907e+07	6.21327e+07	5.71292e+07	6.30619e+07	5.75177e+07	5.81829e+07	9.09438e+07	9.05421e+07	8.92316e+07	GO:0030976, GO:0004591, GO:0006099, GO:0016624	atr:18438344||http://www.genome.jp/dbget-bin/www_bget?atr:18438344	Citrate cycle (TCA cycle)
G7L7H0	Malic enzyme	11412374	Malic enzyme OS=Medicago truncatula OX=3880 GN=11412374 PE=3 SV=1	0	202.654	40	20	126	4	591	65.3	6.37	412.39	20	1	7.67731e+07	6.24054e+07	7.21422e+07	3.72952e+07	4.19738e+07	3.6441e+07	3.86183e+07	3.92373e+07	3.61878e+07	3.83523e+07	3.69558e+07	3.75859e+07	6.47647e+07	6.68565e+07	6.33376e+07	7.46095e+07	6.41841e+07	7.05288e+07	4.10436e+07	4.2517e+07	3.90533e+07	3.94087e+07	3.98575e+07	4.1702e+07	3.93584e+07	4.30629e+07	4.23834e+07	6.5459e+07	6.3543e+07	6.32106e+07	GO:0004471, GO:0051287, GO:0004470	atr:18443418||http://www.genome.jp/dbget-bin/www_bget?atr:18443418	Carbon metabolism
A0A072VNH5	Coatomer subunit alpha	25484848	Coatomer subunit alpha OS=Medicago truncatula OX=3880 GN=25484848 PE=4 SV=1	0	201.85	29	35	168	18	1216	136.2	6.92	430.47	19	1	7.47634e+07	7.16879e+07	7.3483e+07	6.98485e+07	7.21546e+07	7.16667e+07	7.22055e+07	7.37932e+07	6.78526e+07	7.15478e+07	6.9222e+07	6.82973e+07	5.76027e+07	5.94384e+07	5.69418e+07	6.95163e+07	7.52062e+07	7.56638e+07	7.61863e+07	7.03255e+07	7.4192e+07	7.287e+07	7.00692e+07	7.80059e+07	7.52183e+07	7.8183e+07	7.70871e+07	6.59597e+07	6.73688e+07	6.54538e+07	GO:0005515, GO:0006886, GO:0030117, GO:0030126, GO:0016192, GO:0005198	atr:18424283||http://www.genome.jp/dbget-bin/www_bget?atr:18424283	---
G7JYQ8	Aconitate hydratase	11421844	Aconitate hydratase OS=Medicago truncatula OX=3880 GN=11421844 PE=3 SV=1	0	199.758	34	27	194	15	901	98.3	6.55	543.77	2	1	2.62365e+07	2.55704e+07	2.52947e+07	2.44195e+07	2.39229e+07	2.39127e+07	2.28256e+07	2.36955e+07	2.51382e+07	2.29606e+07	2.62873e+07	2.59585e+07	4.77364e+07	4.02393e+07	4.39607e+07	2.6216e+07	2.22999e+07	2.23428e+07	2.20159e+07	2.31815e+07	2.33451e+07	2.3346e+07	2.3518e+07	2.11155e+07	2.43229e+07	2.2089e+07	2.25022e+07	4.43783e+07	4.13034e+07	4.37673e+07	---	atr:18424196||http://www.genome.jp/dbget-bin/www_bget?atr:18424196	2-Oxocarboxylic acid metabolism
A0A072TTK9	Alpha-glucan water dikinase	25501479	Alpha-glucan water dikinase OS=Medicago truncatula OX=3880 GN=25501479 PE=3 SV=1	0	199.594	26	35	117	35	1483	165.1	6.62	309.49	0	1	3.62585e+07	3.33427e+07	3.40394e+07	3.67477e+07	3.76116e+07	3.83461e+07	3.70222e+07	3.7938e+07	3.2545e+07	3.69582e+07	3.34408e+07	3.36462e+07	5.31132e+07	4.94409e+07	5.0355e+07	3.52423e+07	3.5232e+07	3.53941e+07	3.75144e+07	3.81201e+07	3.91678e+07	3.85662e+07	3.98353e+07	3.58525e+07	3.86283e+07	3.68651e+07	3.60071e+07	5.48698e+07	4.87946e+07	5.14128e+07	GO:0005524, GO:0016301, GO:0016310	atr:18430814||http://www.genome.jp/dbget-bin/www_bget?atr:18430814	---
G7KX95	Alpha-mannosidase	11436262	Alpha-mannosidase OS=Medicago truncatula OX=3880 GN=11436262 PE=3 SV=2	0	198.875	20	21	199	14	1061	120.8	6.13	563.79	1	1	1.15627e+08	1.15685e+08	1.37448e+08	3.9384e+07	4.10904e+07	3.08042e+07	3.0602e+07	2.84834e+07	5.46714e+07	2.87431e+07	5.81458e+07	4.56479e+07	4.03441e+07	4.19443e+07	4.09416e+07	1.29244e+08	1.07891e+08	1.25971e+08	3.82493e+07	4.4579e+07	3.64838e+07	3.31892e+07	3.037e+07	5.78747e+07	3.11514e+07	5.41115e+07	5.36263e+07	3.76796e+07	3.8321e+07	3.83762e+07	GO:0005975, GO:0006013, GO:0030246, GO:0004559, GO:0003824	atr:18434345||http://www.genome.jp/dbget-bin/www_bget?atr:18434345	Other glycan degradation
A0A072TPW7	Phosphoenolpyruvate carboxylase	25502534	Phosphoenolpyruvate carboxylase OS=Medicago truncatula OX=3880 GN=25502534 PE=3 SV=1	0	198.106	33	30	96	15	967	110.5	5.88	283.05	1	1	1.97213e+07	1.68074e+07	1.7871e+07	1.63967e+07	1.81204e+07	1.84148e+07	1.96947e+07	1.9518e+07	1.63906e+07	1.93312e+07	1.64358e+07	1.67538e+07	2.6173e+07	2.11541e+07	2.35143e+07	1.71396e+07	1.66991e+07	1.719e+07	1.80213e+07	1.9936e+07	1.98943e+07	2.11403e+07	2.08221e+07	1.5631e+07	2.01976e+07	1.60001e+07	1.60287e+07	2.95443e+07	2.75985e+07	2.8436e+07	GO:0006099, GO:0003824, GO:0008964, GO:0015977	atr:18442136||http://www.genome.jp/dbget-bin/www_bget?atr:18442136	Carbon metabolism
Q2HTQ3	Granulin; Peptidase C1A, papain	11414228	Granulin; Peptidase C1A, papain OS=Medicago truncatula OX=3880 GN=11414228 PE=3 SV=1	0	197.635	30	13	326	13	474	52.2	6.28	1085.56	0	1	1.30036e+09	1.07857e+09	1.25849e+09	6.22018e+08	7.6319e+08	7.28147e+08	7.16204e+08	6.52414e+08	1.11562e+09	6.77601e+08	1.0328e+09	9.05288e+08	2.7421e+08	2.76236e+08	2.78635e+08	1.25048e+09	1.02805e+09	1.18822e+09	6.42237e+08	7.8413e+08	7.54029e+08	6.95675e+08	6.78236e+08	1.19717e+09	7.11301e+08	1.07462e+09	1.03241e+09	2.86669e+08	2.92785e+08	2.85869e+08	GO:0006508, GO:0008234	atr:18445017||http://www.genome.jp/dbget-bin/www_bget?atr:18445017	---
G7L017	Actin-97	11441933	Actin-97 OS=Medicago truncatula OX=3880 GN=11441933 PE=3 SV=1	0	197.605	49	14	201	3	377	41.8	5.4	627.51	0	1	1.30575e+07	1.03726e+07	1.13279e+07	9.5735e+06	1.101e+07	1.08489e+07	1.18167e+07	1.22874e+07	8.1883e+06	1.20584e+07	7.89058e+06	8.16376e+06	8.22289e+06	8.44649e+06	7.98181e+06	1.40543e+07	1.01494e+07	1.12096e+07	9.70492e+06	1.16082e+07	1.15229e+07	1.27209e+07	1.32255e+07	7.33998e+06	1.25436e+07	7.42676e+06	7.64167e+06	8.67945e+06	9.02233e+06	8.61085e+06	---	atr:18445425||http://www.genome.jp/dbget-bin/www_bget?atr:18445425	---
G7J0Z5	Photosystem I P700 chlorophyll a apoprotein A1	MTR_3g035600	Photosystem I P700 chlorophyll a apoprotein A1 OS=Medicago truncatula OX=3880 GN=MTR_3g035600 PE=3 SV=2	0	197.404	16	21	493	9	1503	167.9	7.28	1330.96	16	1	6.32101e+08	7.65208e+08	7.37707e+08	1.05908e+09	8.3116e+08	9.28256e+08	9.49829e+08	9.19971e+08	1.19942e+09	9.53803e+08	1.10237e+09	1.13527e+09	5.74896e+08	5.93679e+08	5.90285e+08	5.65293e+08	7.34287e+08	7.11253e+08	1.01382e+09	8.51725e+08	9.44303e+08	9.59226e+08	9.02145e+08	1.18911e+09	9.27119e+08	1.09263e+09	1.11941e+09	5.87545e+08	6.00768e+08	5.99701e+08	GO:0009579, GO:0016021, GO:0046872, GO:0015979, GO:0009522	atr:2546506|psaB, AmtrCp021|http://www.genome.jp/dbget-bin/www_bget?atr:2546506	Photosynthesis
A2Q689	DEAD-box ATP-dependent RNA helicase	11444422	DEAD-box ATP-dependent RNA helicase OS=Medicago truncatula OX=3880 GN=11444422 PE=3 SV=1	0	197.366	48	21	218	5	413	46.8	5.48	556.54	21	1	1.41641e+08	1.36585e+08	1.47896e+08	1.35847e+08	1.5139e+08	1.56394e+08	1.31492e+08	1.32603e+08	1.14198e+08	1.27493e+08	1.12652e+08	1.13847e+08	1.3332e+08	1.37384e+08	1.30682e+08	1.61336e+08	1.3612e+08	1.46484e+08	1.34473e+08	1.50824e+08	1.60623e+08	1.42775e+08	1.43262e+08	1.09723e+08	1.42042e+08	1.06444e+08	1.06909e+08	1.13415e+08	1.15276e+08	1.13355e+08	GO:0003724, GO:0005524, GO:0003676	atr:18443664||http://www.genome.jp/dbget-bin/www_bget?atr:18443664	RNA transport
S4T093	Photosystem II CP43 reaction center protein	psbC	Photosystem II CP43 reaction center protein OS=Medicago truncatula OX=3880 GN=psbC PE=3 SV=1	0	196.217	32	14	304	3	473	51.9	7.21	917.57	0	1	1.0009e+07	8.17425e+06	7.40726e+06	9.34428e+06	1.21779e+07	1.11392e+07	1.35552e+07	1.48219e+07	9.52753e+06	1.37638e+07	1.0017e+07	9.82141e+06	1.10776e+07	1.14543e+07	1.12451e+07	9.51305e+06	8.07675e+06	7.34972e+06	9.44242e+06	1.27916e+07	1.18004e+07	1.41732e+07	1.46381e+07	1.05908e+07	1.46585e+07	1.06786e+07	1.04098e+07	9.74762e+06	1.00169e+07	1.01208e+07	GO:0009521, GO:0045156, GO:0019684, GO:0009772, GO:0015979, GO:0009767, GO:0016020, GO:0009523, GO:0016168	atr:2546587|psbC, AmtrCp018|http://www.genome.jp/dbget-bin/www_bget?atr:2546587	Photosynthesis
A0A072VJS5	Monodehydroascorbate reductase	25483862	Monodehydroascorbate reductase OS=Medicago truncatula OX=3880 GN=25483862 PE=4 SV=1	0	195.933	52	22	178	20	434	47	6.02	565.54	2	1	1.13656e+08	1.16915e+08	1.15959e+08	1.4316e+08	1.40784e+08	1.41307e+08	1.32735e+08	1.40115e+08	1.20261e+08	1.2687e+08	1.19836e+08	1.2204e+08	1.45386e+08	1.49477e+08	1.44105e+08	1.19676e+08	1.12635e+08	1.15488e+08	1.28338e+08	1.3859e+08	1.44304e+08	1.29596e+08	1.37475e+08	1.11019e+08	1.29917e+08	1.10957e+08	1.12108e+08	1.43175e+08	1.45215e+08	1.42704e+08	GO:0016491, GO:0050660	atr:18447855||http://www.genome.jp/dbget-bin/www_bget?atr:18447855	Ascorbate and aldarate metabolism
A0A072V1W7	Calnexin 2	11434549	Calnexin 2 OS=Medicago truncatula OX=3880 GN=11434549 PE=3 SV=1	0	193.586	34	21	94	1	546	62.2	4.81	259.85	23	1	2.45997e+07	2.60911e+07	2.57971e+07	2.87437e+07	2.94415e+07	3.16709e+07	2.65492e+07	2.78987e+07	2.76482e+07	2.70755e+07	2.82483e+07	2.92218e+07	5.26493e+07	5.5617e+07	5.22167e+07	2.13613e+07	2.34517e+07	2.32305e+07	2.68975e+07	2.84525e+07	3.03668e+07	2.67354e+07	2.66773e+07	2.56969e+07	2.58765e+07	2.62786e+07	2.71195e+07	5.62547e+07	5.79416e+07	5.48101e+07	GO:0005783, GO:0051082, GO:0005515, GO:0005509, GO:0006457	atr:18434560||http://www.genome.jp/dbget-bin/www_bget?atr:18434560	Phagosome
G7JCD0	Plasma membrane ATPase	11436640	Plasma membrane ATPase OS=Medicago truncatula OX=3880 GN=11436640 PE=3 SV=1	0	193.288	24	23	120	11	951	104.6	6.83	328	2	1	1.21984e+07	1.39635e+07	1.29472e+07	1.78139e+07	1.71678e+07	1.74569e+07	1.6542e+07	1.73318e+07	1.46229e+07	1.72269e+07	1.61287e+07	1.64789e+07	3.69476e+07	1.86812e+07	3.01545e+07	1.1594e+07	1.27134e+07	1.1892e+07	1.64719e+07	1.6658e+07	1.69514e+07	1.53041e+07	1.56957e+07	1.41859e+07	1.54389e+07	1.50702e+07	1.53819e+07	3.70009e+07	2.09691e+07	3.0842e+07	GO:0120029, GO:0008553, GO:0005215, GO:0005524, GO:0000166, GO:0140603, GO:0016021	atr:18435577||http://www.genome.jp/dbget-bin/www_bget?atr:18435577	Oxidative phosphorylation
A0A072VL01	Succinate--CoA ligase [ADP-forming] subunit beta, mitochondrial	MTR_1g069645	Succinate--CoA ligase [ADP-forming] subunit beta, mitochondrial OS=Medicago truncatula OX=3880 GN=MTR_1g069645 PE=3 SV=1	0	189.941	49	21	125	21	421	45.1	5.91	382.72	0	1	6.34299e+07	5.99406e+07	6.05564e+07	6.22766e+07	6.6667e+07	6.77567e+07	6.85469e+07	6.83973e+07	5.14686e+07	6.69995e+07	5.6001e+07	5.30298e+07	9.45437e+07	9.57803e+07	9.33996e+07	6.08459e+07	6.29504e+07	6.3761e+07	6.66822e+07	6.63076e+07	7.01302e+07	6.44785e+07	6.81712e+07	6.23731e+07	6.52643e+07	6.48857e+07	5.94909e+07	9.34807e+07	9.22105e+07	9.08758e+07	GO:0003824, GO:0005524, GO:0006099, GO:0046872	atr:18447203||http://www.genome.jp/dbget-bin/www_bget?atr:18447203	Propanoate metabolism
G7KN93	Cytochrome c1, heme protein	11422541	Cytochrome c1, heme protein OS=Medicago truncatula OX=3880 GN=11422541 PE=4 SV=1	0	187.417	30	6	104	6	306	33.3	6.62	355.86	0	1	2.18011e+07	2.30007e+07	2.31173e+07	2.24007e+07	2.29639e+07	2.39761e+07	2.72178e+07	2.69405e+07	2.41935e+07	2.73215e+07	2.31662e+07	2.34772e+07	2.02758e+07	2.07678e+07	2.00141e+07	2.23315e+07	2.44701e+07	2.5307e+07	2.38375e+07	2.39695e+07	2.52404e+07	2.47181e+07	2.42538e+07	2.698e+07	2.46836e+07	2.50925e+07	2.5729e+07	1.85688e+07	1.90587e+07	1.86228e+07	GO:0009055, GO:0020037	atr:18447330||http://www.genome.jp/dbget-bin/www_bget?atr:18447330	Oxidative phosphorylation
B7FIH3	Actin-97	25479628	Actin-97 OS=Medicago truncatula OX=3880 GN=25479628 PE=2 SV=1	0	186.404	51	15	203	2	377	41.6	5.49	628.31	0	1	2.46022e+06	1.54143e+06	1.70078e+06	1.81717e+06	2.98008e+06	2.65534e+06	2.19784e+06	2.4313e+06	1.10818e+06	2.1047e+06	950416	1.01695e+06	1.03403e+06	1.14322e+06	996856	1.96962e+06	1.68462e+06	1.68052e+06	2.26819e+06	2.53779e+06	2.49693e+06	2.06187e+06	2.22933e+06	1.54007e+06	2.03315e+06	1.62422e+06	1.56542e+06	1.31738e+06	1.36374e+06	1.39323e+06	---	atr:18445425||http://www.genome.jp/dbget-bin/www_bget?atr:18445425	---
G7KFK1	Protein TIC110	11406536	Protein TIC110 OS=Medicago truncatula OX=3880 GN=11406536 PE=4 SV=1	0	184.825	27	25	99	25	993	109.7	6.34	315.47	0	1	3.84029e+07	3.69945e+07	3.73703e+07	4.62619e+07	4.63015e+07	4.75849e+07	4.63715e+07	4.62306e+07	3.96694e+07	4.6626e+07	4.13347e+07	4.11739e+07	5.52948e+07	5.6162e+07	5.45285e+07	3.73181e+07	3.80099e+07	3.79161e+07	4.58995e+07	4.63402e+07	4.95206e+07	4.95287e+07	4.79492e+07	4.10081e+07	4.70945e+07	4.06416e+07	4.11444e+07	5.33377e+07	5.43664e+07	5.29247e+07	---	atr:18436709||http://www.genome.jp/dbget-bin/www_bget?atr:18436709	---
Q1RSH3	GroEL-like chaperone, ATPase	11417779	GroEL-like chaperone, ATPase OS=Medicago truncatula OX=3880 GN=11417779 PE=3 SV=1	0	184.822	39	24	96	6	574	61.1	6.09	304.2	23	1	2.9946e+07	3.09103e+07	3.06019e+07	3.18554e+07	3.21071e+07	3.29048e+07	3.25129e+07	3.21348e+07	2.60928e+07	3.20571e+07	2.78028e+07	2.82915e+07	5.49525e+07	4.91008e+07	5.3382e+07	2.98406e+07	2.86838e+07	2.98214e+07	3.01685e+07	3.20704e+07	3.29184e+07	3.28342e+07	3.25958e+07	2.86682e+07	3.27436e+07	3.01825e+07	3.0177e+07	5.03552e+07	4.79744e+07	4.79515e+07	GO:0042026, GO:0006457, GO:0016887, GO:0005524	atr:18432542||http://www.genome.jp/dbget-bin/www_bget?atr:18432542	RNA degradation
A0A072VC19	Beta-galactosidase	11412797	Beta-galactosidase OS=Medicago truncatula OX=3880 GN=11412797 PE=3 SV=1	0	184.794	26	16	132	4	801	88.2	7.59	473.1	14	1	2.05911e+08	1.3617e+08	1.61814e+08	8.16363e+07	1.03936e+08	9.28769e+07	8.98948e+07	8.70004e+07	1.5677e+08	8.67998e+07	1.43889e+08	1.36547e+08	5.42972e+07	5.40922e+07	5.37075e+07	1.93687e+08	1.4503e+08	1.63202e+08	9.38521e+07	1.06844e+08	9.87658e+07	9.44296e+07	9.12388e+07	1.72077e+08	9.5213e+07	1.53018e+08	1.40499e+08	5.69455e+07	5.70788e+07	5.69986e+07	GO:0004553, GO:0005975, GO:0030246	atr:18444251||http://www.genome.jp/dbget-bin/www_bget?atr:18444251	---
G7JXA7	Alpha-glucosidase	11429935	Alpha-glucosidase OS=Medicago truncatula OX=3880 GN=11429935 PE=3 SV=1	0	184.59	23	19	193	13	926	102.9	6.77	508.66	8	1	1.42659e+08	1.14509e+08	1.28407e+08	7.47169e+07	8.39879e+07	7.65394e+07	8.09611e+07	8.12792e+07	8.89343e+07	8.09329e+07	8.68797e+07	8.58174e+07	6.06801e+07	6.21845e+07	6.08585e+07	1.59657e+08	1.26728e+08	1.47766e+08	6.93326e+07	8.12039e+07	7.29865e+07	7.67453e+07	7.68474e+07	1.08439e+08	7.88653e+07	9.96393e+07	9.71166e+07	4.58097e+07	4.57788e+07	4.63289e+07	GO:0003824, GO:0004553, GO:0030246, GO:0005975	atr:18432096||http://www.genome.jp/dbget-bin/www_bget?atr:18432096	---
A0A072VRS6	D-glycerate dehydrogenase/hydroxypyruvate reductase	25485608	D-glycerate dehydrogenase/hydroxypyruvate reductase OS=Medicago truncatula OX=3880 GN=25485608 PE=3 SV=1	0	183.801	55	19	131	19	386	42.2	7.42	398.17	0	1	7.20415e+07	7.37863e+07	7.41573e+07	7.50791e+07	7.97543e+07	8.18456e+07	7.99623e+07	8.10694e+07	6.54189e+07	8.15272e+07	6.73622e+07	6.81993e+07	1.06753e+08	1.09325e+08	1.04475e+08	7.67775e+07	7.30296e+07	7.46531e+07	7.85017e+07	8.8177e+07	8.99837e+07	9.07411e+07	9.20175e+07	5.82488e+07	8.88654e+07	6.01445e+07	6.17904e+07	1.09698e+08	1.04116e+08	1.06258e+08	GO:0051287, GO:0016616	atr:18436634||http://www.genome.jp/dbget-bin/www_bget?atr:18436634	Glycine, serine and threonine metabolism
G7LD98	Guanine nucleotide-binding protein beta subunit-like protein	11410151	Guanine nucleotide-binding protein beta subunit-like protein OS=Medicago truncatula OX=3880 GN=11410151 PE=4 SV=1	0	183.722	56	16	144	16	325	35.7	7.44	485.37	0	1	9.26572e+07	1.08125e+08	1.13704e+08	1.02112e+08	8.87406e+07	9.80457e+07	7.65893e+07	7.48199e+07	9.95229e+07	7.46013e+07	9.83304e+07	9.64222e+07	1.14592e+08	9.68228e+07	1.09291e+08	1.14341e+08	1.30754e+08	1.37018e+08	1.1535e+08	1.04553e+08	1.10491e+08	8.83316e+07	8.3134e+07	1.06077e+08	9.03353e+07	1.05137e+08	1.02308e+08	1.03601e+08	9.45829e+07	9.90747e+07	GO:0005515	atr:18428078||http://www.genome.jp/dbget-bin/www_bget?atr:18428078	---
G7JAR7	Serine hydroxymethyltransferase	11442479	Serine hydroxymethyltransferase OS=Medicago truncatula OX=3880 GN=11442479 PE=3 SV=1	0	183.056	30	14	111	2	471	51.6	7.27	393.07	0	1	5.75071e+06	5.15342e+06	5.39863e+06	4.74666e+06	5.48887e+06	4.83148e+06	5.02373e+06	5.58127e+06	3.0678e+06	5.03565e+06	3.07251e+06	3.18379e+06	4.48325e+06	4.53436e+06	4.40558e+06	6.17549e+06	5.38453e+06	5.99684e+06	5.16623e+06	5.39358e+06	5.85775e+06	5.18634e+06	5.71022e+06	3.40287e+06	5.01248e+06	3.45659e+06	3.30753e+06	4.45318e+06	4.79975e+06	4.57201e+06	GO:0004372, GO:0019264, GO:0035999, GO:0030170, GO:0003824	atr:18438270||http://www.genome.jp/dbget-bin/www_bget?atr:18438270	Cyanoamino acid metabolism
A0A072TVH5	Heat shock protein 81-2	25479542	Heat shock protein 81-2 OS=Medicago truncatula OX=3880 GN=25479542 PE=3 SV=1	0	182.631	27	22	102	17	791	89.8	5.14	265.54	5	1	2.64461e+07	1.97956e+07	2.16086e+07	2.34887e+07	2.6277e+07	2.65286e+07	2.66952e+07	2.6758e+07	2.11258e+07	2.68159e+07	2.06187e+07	2.15366e+07	3.27299e+07	3.23969e+07	3.24367e+07	2.49399e+07	2.25599e+07	2.32778e+07	2.40847e+07	2.42139e+07	2.56622e+07	2.49021e+07	2.53943e+07	2.3589e+07	2.39647e+07	2.39756e+07	2.4182e+07	3.48203e+07	3.30939e+07	3.4983e+07	GO:0051082, GO:0005524, GO:0016887, GO:0006457	atr:18433953||http://www.genome.jp/dbget-bin/www_bget?atr:18433953	Protein processing in endoplasmic reticulum
A0A396I9C2	Coatomer subunit alpha	MtrunA17_Chr4g0035611	Coatomer subunit alpha OS=Medicago truncatula OX=3880 GN=MtrunA17_Chr4g0035611 PE=4 SV=1	0	181.902	31	34	128	17	1223	137.2	6.9	338.36	0	1	3.14401e+07	2.64397e+07	2.89854e+07	2.39758e+07	2.55334e+07	2.54959e+07	2.82034e+07	2.71876e+07	2.27295e+07	3.07273e+07	2.30181e+07	2.35954e+07	2.80925e+07	2.82099e+07	2.66629e+07	2.86205e+07	2.56986e+07	2.74493e+07	2.56389e+07	2.71146e+07	2.74024e+07	2.92203e+07	2.67318e+07	2.6494e+07	3.18103e+07	2.60819e+07	2.69881e+07	2.83309e+07	2.80278e+07	2.71198e+07	GO:0005198, GO:0016192, GO:0030126, GO:0005515, GO:0006886, GO:0030117	atr:18424283||http://www.genome.jp/dbget-bin/www_bget?atr:18424283	---
G7IAA1	Adenosine kinase	11421324	Adenosine kinase OS=Medicago truncatula OX=3880 GN=11421324 PE=3 SV=1	0	181.834	46	13	76	5	341	37.6	5.19	272.93	11	1	3.63479e+07	3.83208e+07	3.9677e+07	3.81034e+07	3.86203e+07	3.97903e+07	3.50929e+07	3.42863e+07	3.9347e+07	3.45048e+07	3.88558e+07	4.02939e+07	7.57055e+07	5.65756e+07	6.68726e+07	3.8963e+07	3.74372e+07	4.01945e+07	3.33379e+07	3.32888e+07	3.46813e+07	3.17381e+07	2.97761e+07	4.33514e+07	3.33185e+07	4.03791e+07	4.26001e+07	7.67728e+07	5.04584e+07	6.39575e+07	GO:0006166, GO:0016773, GO:0004001	atr:18995830||http://www.genome.jp/dbget-bin/www_bget?atr:18995830	Purine metabolism
G7JTX3	26S proteasome non-ATPase regulatory subunit 2 homolog	11445486	26S proteasome non-ATPase regulatory subunit 2 homolog OS=Medicago truncatula OX=3880 GN=11445486 PE=3 SV=1	0	181.272	32	26	116	26	886	97.2	5.24	309.36	0	1	3.61444e+07	3.70818e+07	3.71916e+07	3.90186e+07	4.01024e+07	4.05675e+07	3.75833e+07	3.91704e+07	3.98746e+07	3.87337e+07	4.07665e+07	4.00549e+07	5.51181e+07	5.43733e+07	5.38444e+07	3.70082e+07	3.49034e+07	3.48579e+07	4.46551e+07	4.76949e+07	5.00106e+07	3.89824e+07	3.93785e+07	3.70284e+07	3.75362e+07	3.75207e+07	3.7558e+07	4.82279e+07	4.83553e+07	4.92047e+07	GO:0030234, GO:0000502, GO:0042176	atr:18433907||http://www.genome.jp/dbget-bin/www_bget?atr:18433907	Proteasome
B7FIY3	General regulatory factor 2	11432749	General regulatory factor 2 OS=Medicago truncatula OX=3880 GN=11432749 PE=2 SV=1	0	180.48	66	17	241	10	260	29.2	4.78	739.45	8	1	1.11935e+08	1.13539e+08	1.1016e+08	1.49303e+08	1.518e+08	1.65517e+08	1.56421e+08	1.60126e+08	1.25141e+08	1.55419e+08	1.25822e+08	1.25308e+08	2.0425e+08	2.02291e+08	1.99848e+08	1.1652e+08	1.17705e+08	1.18772e+08	1.4335e+08	1.57987e+08	1.69632e+08	1.7171e+08	1.77114e+08	1.37484e+08	1.63308e+08	1.34573e+08	1.36644e+08	2.11458e+08	2.14734e+08	2.0686e+08	---	atr:18442778||http://www.genome.jp/dbget-bin/www_bget?atr:18442778	---
G7KFM2	Peroxidase	11433612	Peroxidase OS=Medicago truncatula OX=3880 GN=11433612 PE=3 SV=1	0	179.434	48	15	182	14	326	35.8	9.29	627.93	1	1	5.4786e+08	3.5449e+08	4.31031e+08	1.77932e+08	2.32696e+08	2.14678e+08	1.8437e+08	1.93591e+08	1.96584e+08	1.85493e+08	1.85747e+08	1.9143e+08	1.07087e+08	1.06982e+08	1.07742e+08	5.19021e+08	3.12847e+08	4.07621e+08	1.74588e+08	2.41442e+08	2.19116e+08	1.90151e+08	1.86516e+08	2.03937e+08	1.89309e+08	2.00502e+08	1.90564e+08	1.02802e+08	1.08014e+08	1.07127e+08	GO:0004601, GO:0006979, GO:0020037, GO:0042744	atr:18433598||http://www.genome.jp/dbget-bin/www_bget?atr:18433598	Phenylpropanoid biosynthesis
G7LIP6	Dicarboxylate carrier protein	11406684	Dicarboxylate carrier protein OS=Medicago truncatula OX=3880 GN=11406684 PE=3 SV=1	0	178.266	49	12	163	12	301	32.2	9.33	489.55	0	1	9.58224e+07	9.771e+07	9.78948e+07	9.4037e+07	9.6381e+07	9.60283e+07	9.91204e+07	1.01104e+08	8.62305e+07	9.6033e+07	8.7328e+07	8.67787e+07	1.00939e+08	9.60826e+07	1.05233e+08	9.7257e+07	1.03762e+08	1.02179e+08	9.97945e+07	9.93269e+07	9.96312e+07	1.00244e+08	1.01548e+08	8.96653e+07	1.00252e+08	9.26923e+07	9.04859e+07	1.25394e+08	1.0658e+08	1.24165e+08	---	atr:18448823||http://www.genome.jp/dbget-bin/www_bget?atr:18448823	---
B5BLW2	Carotenoid 9,10(9',10')-cleavage dioxygenase 1	ccd1	Carotenoid 9,10(9',10')-cleavage dioxygenase 1 OS=Medicago truncatula OX=3880 GN=ccd1 PE=2 SV=1	0	177.523	42	21	90	21	540	60.9	6.79	278.5	0	1	4.66929e+07	5.09697e+07	4.88543e+07	5.58882e+07	5.62407e+07	6.05093e+07	5.73431e+07	5.81196e+07	5.21708e+07	5.65374e+07	5.29947e+07	5.21702e+07	7.6734e+07	5.8336e+07	6.78726e+07	4.86292e+07	5.25893e+07	5.23888e+07	5.64709e+07	5.7045e+07	6.09526e+07	5.75719e+07	5.73541e+07	5.58604e+07	5.68556e+07	5.59955e+07	5.67847e+07	7.69836e+07	6.47546e+07	6.95273e+07	GO:0016702	atr:18440003||http://www.genome.jp/dbget-bin/www_bget?atr:18440003	---
G7L7L3	Putative tripeptidyl-peptidase II	11434053	Putative tripeptidyl-peptidase II OS=Medicago truncatula OX=3880 GN=11434053 PE=3 SV=1	0	177.147	24	16	101	16	785	83.8	6.83	335.13	0	1	1.07338e+08	8.70773e+07	1.02749e+08	4.08594e+07	4.24753e+07	3.41714e+07	3.56603e+07	3.54502e+07	3.95726e+07	3.61832e+07	4.10629e+07	4.00915e+07	4.1707e+07	4.36079e+07	4.20699e+07	1.0563e+08	9.02085e+07	1.06571e+08	3.81677e+07	4.21318e+07	3.48822e+07	3.62186e+07	3.62312e+07	3.85349e+07	3.71195e+07	3.97781e+07	3.86481e+07	4.2092e+07	4.30837e+07	4.29357e+07	GO:0006508, GO:0004252, GO:0008236	atr:18431494||http://www.genome.jp/dbget-bin/www_bget?atr:18431494	---
A0A396GNA8	Chitinase	MtrunA17_Chr8g0370821	Chitinase OS=Medicago truncatula OX=3880 GN=MtrunA17_Chr8g0370821 PE=4 SV=1	0	176.708	45	8	145	8	331	35.5	7.21	533.25	0	1	1.68321e+08	1.22057e+08	1.5453e+08	4.10003e+07	5.06411e+07	3.71625e+07	4.06394e+07	3.97087e+07	4.42146e+07	4.21152e+07	4.59394e+07	4.36354e+07	3.9382e+07	4.09974e+07	4.05534e+07	1.52981e+08	1.30042e+08	1.54214e+08	5.1344e+07	5.50342e+07	4.27488e+07	4.33769e+07	4.18374e+07	4.50731e+07	4.46858e+07	4.77507e+07	4.54612e+07	4.98106e+07	5.07084e+07	5.11725e+07	GO:0008061, GO:0005975, GO:0004568, GO:0006032, GO:0016998	atr:18424337||http://www.genome.jp/dbget-bin/www_bget?atr:18424337	MAPK signaling pathway - plant
A0A072TLZ7	Lipoxygenase	25500504	Lipoxygenase OS=Medicago truncatula OX=3880 GN=25500504 PE=3 SV=1	0	176.247	32	24	177	10	865	96.9	6.37	489.3	19	1	8.50085e+07	8.15298e+07	8.62172e+07	5.9618e+07	5.61787e+07	5.40194e+07	5.53976e+07	5.55086e+07	6.25479e+07	5.72994e+07	6.45164e+07	6.61272e+07	1.21446e+08	1.15824e+08	1.15409e+08	8.5282e+07	8.12302e+07	8.36195e+07	6.1534e+07	5.75381e+07	5.73528e+07	5.52589e+07	5.42632e+07	6.81409e+07	5.70588e+07	6.98635e+07	7.13677e+07	1.0926e+08	1.08611e+08	1.08603e+08	GO:0005515, GO:0016491, GO:0046872, GO:0016702	atr:18439893||http://www.genome.jp/dbget-bin/www_bget?atr:18439893	---
G7JRA2	Tubulin beta chain	11439086	Tubulin beta chain OS=Medicago truncatula OX=3880 GN=11439086 PE=2 SV=1	0	175.993	41	17	128	3	449	50.5	4.83	376.23	4	1	4.80092e+07	4.89169e+07	5.16774e+07	3.60589e+07	2.94704e+07	2.88035e+07	3.58124e+07	3.52284e+07	2.73269e+07	3.38742e+07	3.00499e+07	2.91672e+07	5.00879e+07	5.19619e+07	4.93285e+07	4.54667e+07	4.78843e+07	4.97371e+07	4.2575e+07	3.67805e+07	3.86387e+07	4.24527e+07	4.42503e+07	3.31598e+07	4.36152e+07	3.44443e+07	3.38131e+07	3.98455e+07	4.09912e+07	4.05502e+07	GO:0003924, GO:0005874, GO:0007017, GO:0005525, GO:0005200	atr:18422898||http://www.genome.jp/dbget-bin/www_bget?atr:18422898	Phagosome
G7IJU3	Peroxidase	11412424	Peroxidase OS=Medicago truncatula OX=3880 GN=11412424 PE=3 SV=2	0	173.324	31	11	258	5	355	37.9	6.52	685.46	6	1	3.11446e+08	3.45312e+08	3.61467e+08	2.48115e+08	2.38131e+08	2.41731e+08	2.30907e+08	2.18211e+08	2.97389e+08	2.2532e+08	2.88243e+08	2.78316e+08	1.14084e+08	1.19059e+08	1.20223e+08	2.88871e+08	3.28009e+08	3.43156e+08	2.55359e+08	2.31056e+08	2.3617e+08	2.22649e+08	2.13132e+08	3.07154e+08	2.29245e+08	2.9458e+08	2.87834e+08	1.20155e+08	1.2137e+08	1.23016e+08	GO:0042744, GO:0020037, GO:0006979, GO:0004601	atr:18439310||http://www.genome.jp/dbget-bin/www_bget?atr:18439310	Phenylpropanoid biosynthesis
G7IML1	Tubulin beta chain	11414871	Tubulin beta chain OS=Medicago truncatula OX=3880 GN=11414871 PE=3 SV=1	0	173.136	42	17	123	2	445	50	4.89	366.34	0	1	1.22376e+06	1.89243e+06	1.73808e+06	1.96539e+06	1.36744e+06	1.42628e+06	1.31191e+06	1.55429e+06	1.75173e+06	1.28441e+06	1.76592e+06	1.66073e+06	1.48606e+06	1.49658e+06	1.47057e+06	1.09447e+06	1.64686e+06	1.59205e+06	1.70068e+06	1.37333e+06	1.48201e+06	1.26223e+06	1.23504e+06	1.53935e+06	1.21396e+06	1.57621e+06	1.513e+06	1.3325e+06	1.42462e+06	1.37024e+06	GO:0003924, GO:0005874, GO:0005525, GO:0005200, GO:0007017	atr:18443057||http://www.genome.jp/dbget-bin/www_bget?atr:18443057	Phagosome
G7JTH4	Caffeic acid O-methyltransferase	11446905	Caffeic acid O-methyltransferase OS=Medicago truncatula OX=3880 GN=11446905 PE=2 SV=1	0	173.132	49	16	196	3	369	41.3	6.29	515.88	19	1	3.41951e+08	2.73327e+08	2.91641e+08	3.08027e+08	4.06474e+08	3.9837e+08	3.92768e+08	4.2834e+08	2.22556e+08	3.88387e+08	2.21018e+08	2.22128e+08	2.12427e+08	2.1736e+08	2.11777e+08	3.34934e+08	2.92311e+08	3.13195e+08	3.22275e+08	4.07907e+08	4.18338e+08	3.86947e+08	4.00803e+08	2.55852e+08	3.83911e+08	2.49926e+08	2.48516e+08	2.24479e+08	2.27642e+08	2.26406e+08	GO:0046983, GO:0008171, GO:0008168	atr:18431505||http://www.genome.jp/dbget-bin/www_bget?atr:18431505	---
A0A072U1H6	Alpha-galactosidase	25498854	Alpha-galactosidase OS=Medicago truncatula OX=3880 GN=25498854 PE=3 SV=1	0	172.936	37	14	161	6	409	45.6	8.38	464.54	0	1	7.02708e+07	6.4018e+07	7.26927e+07	4.32456e+07	4.50002e+07	4.38252e+07	4.09894e+07	3.76939e+07	4.5976e+07	4.08683e+07	4.4997e+07	4.61908e+07	3.24266e+07	3.35573e+07	3.32756e+07	7.74124e+07	7.88246e+07	8.74514e+07	5.36741e+07	5.38995e+07	5.19869e+07	4.55347e+07	4.5909e+07	5.17192e+07	4.35849e+07	5.23052e+07	5.05173e+07	3.23024e+07	3.33884e+07	3.42709e+07	GO:0003824, GO:0004553, GO:0005975	atr:18438394||http://www.genome.jp/dbget-bin/www_bget?atr:18438394	Glycosphingolipid biosynthesis - globo and isoglobo series
A0A072VMZ6	DEAD-box ATP-dependent RNA helicase	11434749	DEAD-box ATP-dependent RNA helicase OS=Medicago truncatula OX=3880 GN=11434749 PE=3 SV=1	0	172.827	47	20	191	4	397	45.1	6.47	485.92	0	1	3.26183e+06	3.35757e+06	3.16431e+06	3.43031e+06	3.38684e+06	3.35635e+06	3.30268e+06	3.69388e+06	3.46501e+06	3.50595e+06	3.50671e+06	3.43292e+06	3.06827e+06	3.10779e+06	3.17678e+06	3.38747e+06	3.0865e+06	3.29829e+06	3.26376e+06	3.58338e+06	3.69332e+06	3.8715e+06	3.87988e+06	3.28169e+06	3.6295e+06	3.35821e+06	3.24727e+06	2.93193e+06	2.97031e+06	2.99313e+06	GO:0003724, GO:0005524, GO:0003676	atr:18443664||http://www.genome.jp/dbget-bin/www_bget?atr:18443664	RNA transport
Q84RD8	Adenosylhomocysteinase	AHC2	Adenosylhomocysteinase OS=Medicago truncatula OX=3880 GN=AHC2 PE=3 SV=1	0	172.433	45	21	261	12	485	53.2	6.01	686.35	11	1	3.03731e+08	2.6458e+08	2.82614e+08	2.24211e+08	2.27887e+08	2.33195e+08	2.29344e+08	2.29006e+08	1.58567e+08	2.17545e+08	1.72692e+08	1.72706e+08	3.44078e+08	3.52955e+08	3.35537e+08	3.09717e+08	2.60336e+08	2.85463e+08	2.06107e+08	2.13957e+08	2.2256e+08	2.06148e+08	2.07157e+08	1.7985e+08	2.01385e+08	1.92301e+08	1.93354e+08	3.6438e+08	3.66621e+08	3.57773e+08	GO:0004013	atr:18438268||http://www.genome.jp/dbget-bin/www_bget?atr:18438268	Cysteine and methionine metabolism
G7J9M6	60S ribosomal protein L6	11419474	60S ribosomal protein L6 OS=Medicago truncatula OX=3880 GN=11419474 PE=2 SV=1	0	171.165	59	14	141	13	193	21.7	9.28	428.66	1	1	1.31767e+08	1.23694e+08	1.32028e+08	1.27873e+08	1.31476e+08	1.38749e+08	1.39371e+08	1.37856e+08	1.75582e+08	1.38162e+08	1.63088e+08	1.64551e+08	1.00494e+08	9.54772e+07	9.63495e+07	1.22756e+08	1.16486e+08	1.23355e+08	1.18005e+08	1.30091e+08	1.38581e+08	1.35034e+08	1.34253e+08	1.63078e+08	1.34663e+08	1.51691e+08	1.54206e+08	1.07752e+08	1.02266e+08	1.0519e+08	GO:0006412, GO:0019843, GO:0005840, GO:0003735	atr:18436398||http://www.genome.jp/dbget-bin/www_bget?atr:18436398	Ribosome
G7LJ01	Acetyltransferase component of pyruvate dehydrogenase complex	11423972	Acetyltransferase component of pyruvate dehydrogenase complex OS=Medicago truncatula OX=3880 GN=11423972 PE=3 SV=1	0	169.097	41	18	123	18	543	59.3	7.71	376.01	0	1	9.74238e+07	8.575e+07	9.55896e+07	6.06626e+07	6.30079e+07	6.09032e+07	5.4375e+07	5.64991e+07	3.70932e+07	4.97574e+07	3.8877e+07	3.76333e+07	5.02634e+07	5.31677e+07	5.08278e+07	9.62417e+07	9.26086e+07	1.04071e+08	6.22258e+07	6.44937e+07	6.41614e+07	5.50319e+07	5.60941e+07	4.16509e+07	5.28682e+07	4.29429e+07	4.10095e+07	4.49258e+07	4.12783e+07	4.4308e+07	GO:0045254, GO:0016746, GO:0006090, GO:0004742	atr:18426345||http://www.genome.jp/dbget-bin/www_bget?atr:18426345	Citrate cycle (TCA cycle)
G7JI05	Glucose-1-phosphate adenylyltransferase	11443131	Glucose-1-phosphate adenylyltransferase OS=Medicago truncatula OX=3880 GN=11443131 PE=3 SV=2	0	168.266	32	15	101	13	521	57.5	7.78	301.91	2	1	3.02833e+07	3.08025e+07	3.03329e+07	3.58755e+07	3.79766e+07	3.92473e+07	3.93852e+07	3.88938e+07	2.93863e+07	3.74466e+07	3.12362e+07	3.24455e+07	6.78799e+07	6.14859e+07	6.31943e+07	2.88158e+07	3.03816e+07	3.04761e+07	3.5452e+07	3.50911e+07	3.78644e+07	3.67334e+07	3.52745e+07	3.29353e+07	3.36226e+07	3.40264e+07	3.51537e+07	7.08322e+07	6.96163e+07	6.80153e+07	GO:0016779, GO:0009058, GO:0008878, GO:0005978	atr:18440520||http://www.genome.jp/dbget-bin/www_bget?atr:18440520	Starch and sucrose metabolism
Q45FF2	Pyridoxal 5'-phosphate synthase subunit PDX1	11446851	Pyridoxal 5'-phosphate synthase subunit PDX1 OS=Medicago truncatula OX=3880 GN=11446851 PE=2 SV=1	0	167.462	35	12	110	12	314	33.5	5.9	336	0	1	2.96731e+07	3.25967e+07	3.03989e+07	4.2535e+07	4.27613e+07	4.41321e+07	4.54132e+07	4.73458e+07	3.35539e+07	4.52727e+07	3.58969e+07	3.69738e+07	9.6139e+07	5.27151e+07	8.00981e+07	3.32648e+07	3.67344e+07	3.39564e+07	4.56929e+07	4.37209e+07	4.58556e+07	4.8012e+07	4.86928e+07	3.58482e+07	4.68005e+07	3.89919e+07	3.89609e+07	8.80535e+07	6.65909e+07	8.14823e+07	GO:0003824, GO:0042823, GO:0042819	atr:18437385||http://www.genome.jp/dbget-bin/www_bget?atr:18437385	Vitamin B6 metabolism
A0A396J759	Putative START-like domain, Bet v I type allergen	MtrunA17_Chr2g0295111	Putative START-like domain, Bet v I type allergen OS=Medicago truncatula OX=3880 GN=MtrunA17_Chr2g0295111 PE=3 SV=1	0	167.253	68	10	118	3	157	16.5	5.07	404.8	0	1	1.22142e+07	1.10922e+07	1.21025e+07	6.44602e+06	6.49329e+06	6.22687e+06	6.1609e+06	5.51577e+06	4.4224e+06	7.28821e+06	5.19184e+06	5.18281e+06	1.06791e+07	1.13293e+07	1.05316e+07	1.03334e+07	1.24274e+07	1.23302e+07	8.53468e+06	7.83453e+06	8.00868e+06	7.31738e+06	7.32018e+06	7.76947e+06	7.15239e+06	8.47084e+06	8.47287e+06	1.25341e+07	1.24313e+07	1.25965e+07	GO:0006952, GO:0004864, GO:0010427, GO:0009738, GO:0038023	atr:18431334||http://www.genome.jp/dbget-bin/www_bget?atr:18431334	---
A0A072TX81	6-phosphogluconate dehydrogenase, decarboxylating	25497623	6-phosphogluconate dehydrogenase, decarboxylating OS=Medicago truncatula OX=3880 GN=25497623 PE=3 SV=1	0	166.772	44	23	125	20	486	53.7	5.78	372.72	3	1	8.10895e+07	8.03286e+07	7.79895e+07	7.87327e+07	8.86197e+07	8.8461e+07	9.09619e+07	9.26224e+07	6.48559e+07	9.0322e+07	6.74043e+07	6.83848e+07	1.22179e+08	1.16974e+08	1.17971e+08	7.57521e+07	7.62806e+07	7.44933e+07	7.44959e+07	8.69091e+07	8.74427e+07	9.47108e+07	9.65734e+07	6.37358e+07	9.30165e+07	6.49607e+07	6.55437e+07	1.17116e+08	1.12568e+08	1.1262e+08	GO:0050661, GO:0016491, GO:0006098, GO:0004616	atr:18447571||http://www.genome.jp/dbget-bin/www_bget?atr:18447571	Glutathione metabolism
G7J2H2	Glyceraldehyde-3-phosphate dehydrogenase	11441068	Glyceraldehyde-3-phosphate dehydrogenase OS=Medicago truncatula OX=3880 GN=11441068 PE=3 SV=1	0	166.733	61	19	260	12	340	37	7.47	727.68	0	1	1.98706e+08	1.97231e+08	2.12724e+08	1.91517e+08	1.91483e+08	2.01652e+08	1.67261e+08	1.73411e+08	1.55078e+08	1.60647e+08	1.52455e+08	1.55773e+08	2.02252e+08	2.16264e+08	2.01959e+08	1.97517e+08	1.91958e+08	2.05714e+08	1.84443e+08	1.96671e+08	2.05914e+08	1.76859e+08	1.80499e+08	1.50454e+08	1.654e+08	1.48588e+08	1.50245e+08	2.12386e+08	2.15649e+08	2.09606e+08	GO:0006006, GO:0051287, GO:0050661, GO:0016620	atr:18443315||http://www.genome.jp/dbget-bin/www_bget?atr:18443315	Glycolysis / Gluconeogenesis
G7J2Y6	Peroxidase	11415900	Peroxidase OS=Medicago truncatula OX=3880 GN=11415900 PE=3 SV=1	0	165.065	44	12	134	7	318	34.5	8.85	372.19	11	1	1.67761e+08	1.82836e+08	2.01682e+08	1.158e+08	1.08813e+08	1.0321e+08	1.06928e+08	1.01333e+08	2.12139e+08	1.12137e+08	1.91654e+08	1.98694e+08	7.18804e+07	6.94521e+07	7.16701e+07	1.58207e+08	1.77396e+08	1.8942e+08	1.16334e+08	1.06424e+08	1.0293e+08	9.88888e+07	9.26661e+07	1.98315e+08	1.10282e+08	1.79312e+08	1.82348e+08	7.17044e+07	7.12316e+07	7.3088e+07	GO:0042744, GO:0020037, GO:0004601, GO:0006979	atr:18432274||http://www.genome.jp/dbget-bin/www_bget?atr:18432274	Phenylpropanoid biosynthesis
A0A072UH84	Coatomer subunit beta'	25491385	Coatomer subunit beta' OS=Medicago truncatula OX=3880 GN=25491385 PE=3 SV=1	0	163.918	23	19	111	9	931	105	4.98	296.71	15	1	4.85097e+07	4.99717e+07	5.22388e+07	4.67811e+07	4.43885e+07	4.63402e+07	4.53904e+07	4.48942e+07	4.29025e+07	4.55129e+07	4.31496e+07	4.26178e+07	3.83377e+07	3.86724e+07	3.80074e+07	5.082e+07	5.11796e+07	5.48075e+07	4.70861e+07	4.84158e+07	4.90213e+07	4.63398e+07	4.39676e+07	3.73967e+07	4.40045e+07	3.85242e+07	3.71199e+07	3.78013e+07	3.58147e+07	3.74358e+07	GO:0005198, GO:0006886, GO:0005515, GO:0016192, GO:0030117	atr:18434208||http://www.genome.jp/dbget-bin/www_bget?atr:18434208	---
A0A396JMK1	Putative ribosomal protein S3	MtrunA17_Chr1g0155631	Putative ribosomal protein S3 OS=Medicago truncatula OX=3880 GN=MtrunA17_Chr1g0155631 PE=3 SV=1	0	162.426	57	18	228	18	239	26.7	9.64	642.43	0	1	2.15254e+08	2.49407e+08	2.52788e+08	2.42625e+08	2.22039e+08	2.31878e+08	2.1141e+08	2.22482e+08	1.9396e+08	2.02762e+08	1.97435e+08	1.92907e+08	2.29935e+08	2.43219e+08	2.36445e+08	2.27424e+08	2.44326e+08	2.55761e+08	2.4242e+08	2.27912e+08	2.44414e+08	2.22743e+08	2.33229e+08	1.98932e+08	2.17349e+08	1.98049e+08	1.96464e+08	2.26176e+08	2.34221e+08	2.33605e+08	GO:0003723, GO:0006412, GO:0003735, GO:0015935	atr:18444382||http://www.genome.jp/dbget-bin/www_bget?atr:18444382	Ribosome
G7LAD5	Inositol-3-phosphate synthase	11411180	Inositol-3-phosphate synthase OS=Medicago truncatula OX=3880 GN=11411180 PE=3 SV=1	0	161.612	39	17	85	5	510	56.4	5.67	295.49	18	1	6.93478e+07	6.88527e+07	7.14026e+07	6.73298e+07	7.25749e+07	7.36863e+07	7.48377e+07	7.32059e+07	8.21714e+07	7.72181e+07	7.94942e+07	8.55895e+07	1.80224e+08	1.33186e+08	1.60333e+08	7.2804e+07	8.35923e+07	8.99385e+07	7.18375e+07	7.60804e+07	7.93188e+07	7.3154e+07	7.45187e+07	6.29987e+07	7.2516e+07	6.49608e+07	6.80528e+07	1.82499e+08	1.32921e+08	1.64803e+08	GO:0008654, GO:0004512, GO:0006021	atr:18422109||http://www.genome.jp/dbget-bin/www_bget?atr:18422109	Inositol phosphate metabolism
A0A396IF27	Pyruvate, phosphate dikinase	MtrunA17_Chr4g0066381	Pyruvate, phosphate dikinase OS=Medicago truncatula OX=3880 GN=MtrunA17_Chr4g0066381 PE=3 SV=1	0	161.418	26	23	94	23	943	103.1	6.32	239.75	0	1	2.87862e+07	2.68123e+07	2.67064e+07	2.82337e+07	3.06818e+07	3.03317e+07	3.13914e+07	3.27629e+07	2.96566e+07	3.2329e+07	2.95444e+07	2.94851e+07	3.82558e+07	4.01523e+07	3.81096e+07	2.6402e+07	2.33227e+07	2.42838e+07	2.71903e+07	3.05511e+07	3.03857e+07	3.09166e+07	3.10919e+07	2.66518e+07	2.95638e+07	2.66315e+07	2.6924e+07	3.83676e+07	3.98601e+07	3.86113e+07	GO:0005524, GO:0016301, GO:0016772, GO:0050242, GO:0006090, GO:0016310, GO:0003824	atr:18440667||http://www.genome.jp/dbget-bin/www_bget?atr:18440667	Carbon metabolism
G7ILA8	Beta-xylosidase/alpha-L-arabinofuranosidase-like protein	11424908	Beta-xylosidase/alpha-L-arabinofuranosidase-like protein OS=Medicago truncatula OX=3880 GN=11424908 PE=3 SV=1	0	160.849	23	17	149	12	775	83.7	6.49	451.22	0	1	6.95539e+07	7.03519e+07	8.03405e+07	3.24684e+07	3.30693e+07	2.77528e+07	2.83709e+07	2.93494e+07	3.53929e+07	2.93602e+07	3.50559e+07	3.47891e+07	2.44623e+07	2.54742e+07	2.51902e+07	7.30518e+07	6.41551e+07	7.47715e+07	2.83837e+07	3.41468e+07	2.87978e+07	2.82837e+07	2.85035e+07	3.40282e+07	2.78264e+07	3.38164e+07	3.30907e+07	1.86768e+07	1.90479e+07	1.98596e+07	GO:0004553, GO:0009044, GO:0045493, GO:0005975	atr:18422386||http://www.genome.jp/dbget-bin/www_bget?atr:18422386	Amino sugar and nucleotide sugar metabolism
A0A072TX52	1-deoxy-D-xylulose-5-phosphate reductoisomerase	25500270	1-deoxy-D-xylulose-5-phosphate reductoisomerase OS=Medicago truncatula OX=3880 GN=25500270 PE=3 SV=1	0	160.761	39	17	91	15	470	51.1	6.76	300.26	2	1	8.50607e+07	8.80632e+07	8.57814e+07	9.43204e+07	1.00916e+08	1.02598e+08	1.02029e+08	1.01624e+08	7.76467e+07	9.48848e+07	8.12121e+07	8.17425e+07	1.71108e+08	1.62654e+08	1.64702e+08	9.10384e+07	9.60648e+07	9.41899e+07	9.75772e+07	1.00585e+08	1.04693e+08	1.01613e+08	1.00946e+08	8.35122e+07	9.64943e+07	8.5885e+07	8.82231e+07	1.84293e+08	1.76752e+08	1.76901e+08	GO:0030604, GO:0070402, GO:0005515, GO:0008299, GO:0046872	atr:18434867||http://www.genome.jp/dbget-bin/www_bget?atr:18434867	Terpenoid backbone biosynthesis
A0A072U9H4	Chlorophyll a-b binding protein, chloroplastic	25496571	Chlorophyll a-b binding protein, chloroplastic OS=Medicago truncatula OX=3880 GN=25496571 PE=3 SV=1	0	160.643	53	13	219	13	289	31	6	774.19	0	1	1.59965e+08	1.85538e+08	1.92854e+08	1.92427e+08	1.73212e+08	1.83671e+08	1.81365e+08	1.80925e+08	2.14292e+08	1.83093e+08	2.1292e+08	2.14885e+08	2.21683e+08	2.1997e+08	2.16734e+08	1.72805e+08	2.01843e+08	2.14215e+08	1.84824e+08	1.61107e+08	1.74522e+08	1.62964e+08	1.63001e+08	2.33277e+08	1.68053e+08	2.21042e+08	2.26253e+08	2.19381e+08	2.23948e+08	2.2491e+08	GO:0009765, GO:0016020	atr:18427807||http://www.genome.jp/dbget-bin/www_bget?atr:18427807	Photosynthesis - antenna proteins
G7L840	Import component Toc86/159, G and M domain protein	11422615	Import component Toc86/159, G and M domain protein OS=Medicago truncatula OX=3880 GN=11422615 PE=3 SV=1	0	160.236	18	19	76	19	1387	149.3	4.41	223.69	0	1	2.15248e+07	1.64822e+07	1.60235e+07	1.68021e+07	1.44995e+07	1.52525e+07	1.53161e+07	1.54941e+07	1.72659e+07	1.61589e+07	1.75603e+07	1.69877e+07	1.36297e+07	1.39115e+07	1.37092e+07	1.95387e+07	1.78666e+07	1.98045e+07	1.39643e+07	1.59506e+07	1.55204e+07	1.51153e+07	1.53071e+07	1.66928e+07	1.50147e+07	1.63411e+07	1.52259e+07	1.08323e+07	1.05563e+07	1.07197e+07	GO:0005525, GO:0003924, GO:0045036, GO:0009707	atr:18430309||http://www.genome.jp/dbget-bin/www_bget?atr:18430309	---
G7KFV1	UTP--glucose-1-phosphate uridylyltransferase	11442099	UTP--glucose-1-phosphate uridylyltransferase OS=Medicago truncatula OX=3880 GN=11442099 PE=3 SV=1	0	158.914	43	19	124	19	470	51.4	5.4	338.06	0	1	9.06345e+07	9.90426e+07	1.03266e+08	9.67442e+07	9.70543e+07	1.01433e+08	9.9384e+07	1.00216e+08	8.8349e+07	9.63521e+07	8.83018e+07	8.7025e+07	1.04314e+08	1.00963e+08	1.02394e+08	8.71021e+07	8.75127e+07	9.05959e+07	9.32676e+07	1.01439e+08	1.04073e+08	1.00779e+08	1.01376e+08	9.22333e+07	9.91974e+07	9.05255e+07	9.05014e+07	1.02299e+08	9.71442e+07	1.00011e+08	GO:0070569, GO:0003983, GO:0006011	atr:18445623||http://www.genome.jp/dbget-bin/www_bget?atr:18445623	Pentose and glucuronate interconversions
A0A072UGQ1	Coatomer subunit beta	25491248	Coatomer subunit beta OS=Medicago truncatula OX=3880 GN=25491248 PE=4 SV=1	0	157.998	27	24	111	24	951	106	5.87	323.2	0	1	3.07728e+07	3.21611e+07	3.25446e+07	3.48618e+07	3.39776e+07	3.60079e+07	3.49501e+07	3.4483e+07	3.35295e+07	3.27766e+07	3.25063e+07	3.23668e+07	2.83904e+07	2.90714e+07	2.85616e+07	3.14748e+07	3.24156e+07	3.38542e+07	3.3835e+07	3.36461e+07	3.58308e+07	3.34261e+07	3.37061e+07	3.53543e+07	3.3041e+07	3.37693e+07	3.42331e+07	2.87651e+07	2.9645e+07	2.90251e+07	GO:0030117, GO:0030126, GO:0016192, GO:0005737, GO:0006886, GO:0005198	atr:18439936||http://www.genome.jp/dbget-bin/www_bget?atr:18439936	---
A0A072TU77	Peptidase M1 family aminopeptidase N	MTR_8g098525	Peptidase M1 family aminopeptidase N OS=Medicago truncatula OX=3880 GN=MTR_8g098525 PE=3 SV=1	0	157.075	24	24	118	24	975	109.6	6.61	279.45	0	1	9.92121e+07	9.47439e+07	9.63185e+07	1.04118e+08	1.0895e+08	1.11087e+08	1.03932e+08	1.02035e+08	8.80182e+07	1.04071e+08	8.94233e+07	9.38341e+07	1.38641e+08	1.25686e+08	1.32217e+08	8.91813e+07	9.26098e+07	9.09302e+07	1.05453e+08	1.12513e+08	1.15179e+08	1.07988e+08	1.11022e+08	8.58366e+07	1.07147e+08	9.18058e+07	8.94793e+07	1.47711e+08	1.44081e+08	1.457e+08	GO:0008237, GO:0006508, GO:0008270	atr:18422841||http://www.genome.jp/dbget-bin/www_bget?atr:18422841	Glutathione metabolism
G7LIY0	Lipoxygenase	11424335	Lipoxygenase OS=Medicago truncatula OX=3880 GN=11424335 PE=3 SV=1	0	156.941	21	19	127	5	868	97.7	6.29	381.97	4	1	2.93096e+07	2.78019e+07	3.37396e+07	1.22212e+07	1.42012e+07	1.09264e+07	1.17268e+07	1.01619e+07	1.92543e+07	1.25128e+07	1.87428e+07	1.89011e+07	2.24935e+07	2.4012e+07	2.18885e+07	2.75576e+07	2.65127e+07	3.24462e+07	1.32207e+07	1.51289e+07	1.31597e+07	1.26592e+07	1.23368e+07	2.01818e+07	1.53269e+07	1.90564e+07	1.93726e+07	2.0978e+07	2.12894e+07	2.00378e+07	GO:0016702, GO:0016491, GO:0046872, GO:0005515	atr:18439893||http://www.genome.jp/dbget-bin/www_bget?atr:18439893	---
A0A072V0J2	Protein disulfide-isomerase	25489685	Protein disulfide-isomerase OS=Medicago truncatula OX=3880 GN=25489685 PE=3 SV=1	0	156.727	32	18	127	17	513	57	5.1	348.79	1	1	8.25434e+07	6.22035e+07	7.07913e+07	5.03872e+07	5.39881e+07	5.56047e+07	5.73774e+07	5.65149e+07	5.53405e+07	5.76963e+07	5.25049e+07	5.51516e+07	1.00178e+08	9.86475e+07	9.63938e+07	7.51552e+07	6.00629e+07	6.63148e+07	5.186e+07	5.78626e+07	5.87996e+07	5.91745e+07	5.71767e+07	5.73566e+07	5.85467e+07	5.54003e+07	5.80252e+07	1.02573e+08	9.95709e+07	9.85529e+07	GO:0003756	atr:18432901||http://www.genome.jp/dbget-bin/www_bget?atr:18432901	Protein processing in endoplasmic reticulum
G7J2R6	Ribonuclease	11434089	Ribonuclease OS=Medicago truncatula OX=3880 GN=11434089 PE=4 SV=1	0	156.575	30	26	78	26	992	108.2	6.98	253.01	0	1	4.1836e+07	3.92843e+07	3.99908e+07	4.10289e+07	4.37307e+07	4.38539e+07	4.75484e+07	4.74691e+07	4.33147e+07	4.47577e+07	4.26788e+07	4.38809e+07	5.58464e+07	5.34548e+07	5.39034e+07	3.6465e+07	3.57991e+07	3.50025e+07	3.51915e+07	3.84073e+07	3.85256e+07	3.9227e+07	4.05812e+07	6.32363e+07	4.02768e+07	5.56633e+07	6.19515e+07	4.54462e+07	4.45792e+07	4.45043e+07	GO:0016442, GO:0031047	atr:18434562||http://www.genome.jp/dbget-bin/www_bget?atr:18434562	---
A0A072V4G2	F0F1 ATP synthase subunit gamma	MTR_2g023290	F0F1 ATP synthase subunit gamma OS=Medicago truncatula OX=3880 GN=MTR_2g023290 PE=3 SV=1	0	156.239	12	13	170	13	1021	111.6	4.96	434.38	0	1	7.57675e+07	6.79081e+07	6.91072e+07	7.33061e+07	7.93045e+07	7.88708e+07	9.19161e+07	8.98783e+07	7.69296e+07	8.70128e+07	8.79092e+07	7.2213e+07	1.69378e+08	1.61914e+08	1.58768e+08	8.04843e+07	7.65458e+07	7.7405e+07	8.16809e+07	8.49287e+07	8.56683e+07	8.85399e+07	8.62848e+07	8.74122e+07	8.52575e+07	9.46904e+07	8.27181e+07	1.66095e+08	1.45507e+08	1.55222e+08	GO:0045261, GO:0046933, GO:0015986	atr:18445706||http://www.genome.jp/dbget-bin/www_bget?atr:18445706	Photosynthesis
G7KB73	Annexin	11433048	Annexin OS=Medicago truncatula OX=3880 GN=11433048 PE=2 SV=1	0	155.98	54	21	205	21	316	36.1	7.61	562.98	0	1	2.16219e+08	1.8776e+08	2.18242e+08	1.40618e+08	1.51376e+08	1.51006e+08	1.65116e+08	1.56689e+08	1.51428e+08	1.56529e+08	1.45852e+08	1.44809e+08	1.33338e+08	1.376e+08	1.31776e+08	2.35507e+08	1.86253e+08	2.1478e+08	1.40034e+08	1.57102e+08	1.5534e+08	1.65568e+08	1.661e+08	1.55129e+08	1.63174e+08	1.44982e+08	1.43322e+08	1.22495e+08	1.24656e+08	1.23551e+08	GO:0005544, GO:0005509	atr:18423840||http://www.genome.jp/dbget-bin/www_bget?atr:18423840	---
G7IYK8	Mannan endo-1,4-beta-mannosidase	11409137	Mannan endo-1,4-beta-mannosidase OS=Medicago truncatula OX=3880 GN=11409137 PE=3 SV=1	0	155.735	30	11	73	10	497	56.4	5.53	265.91	1	1	6.95594e+07	6.33544e+07	6.89965e+07	5.75775e+07	6.7861e+07	6.54463e+07	5.21728e+07	5.43377e+07	6.58242e+07	5.24452e+07	6.39466e+07	6.17777e+07	2.85973e+07	2.9222e+07	2.82899e+07	7.98299e+07	7.74969e+07	8.62072e+07	5.9387e+07	6.15825e+07	6.2339e+07	5.04976e+07	5.27646e+07	7.36437e+07	5.12121e+07	6.95157e+07	6.77541e+07	2.97278e+07	2.92305e+07	3.01071e+07	GO:0051015, GO:0007015, GO:0004553, GO:0071704	atr:18421993||http://www.genome.jp/dbget-bin/www_bget?atr:18421993	---
G7J6L9	Glycoside hydrolase family 3 protein	11435958	Glycoside hydrolase family 3 protein OS=Medicago truncatula OX=3880 GN=11435958 PE=3 SV=1	0	155.618	26	17	123	13	627	68.4	8.7	379.92	5	1	2.3941e+08	2.59889e+08	2.88345e+08	1.02619e+08	1.02935e+08	8.63713e+07	7.72362e+07	7.92514e+07	9.61801e+07	7.93043e+07	1.00216e+08	9.60437e+07	1.04006e+08	1.08996e+08	1.05756e+08	2.57223e+08	2.5763e+08	2.83743e+08	1.04982e+08	1.06476e+08	8.93874e+07	8.04937e+07	7.86105e+07	1.02273e+08	7.83947e+07	1.0793e+08	1.02725e+08	8.78767e+07	9.00264e+07	9.01716e+07	GO:0004553, GO:0005975	atr:18421559||http://www.genome.jp/dbget-bin/www_bget?atr:18421559	Cyanoamino acid metabolism
G7KDJ3	Succinate dehydrogenase [ubiquinone] flavoprotein subunit, mitochondrial	11405633	Succinate dehydrogenase [ubiquinone] flavoprotein subunit, mitochondrial OS=Medicago truncatula OX=3880 GN=11405633 PE=3 SV=1	0	155.453	32	15	104	15	626	68.9	6.57	304.48	0	1	5.10875e+07	5.56308e+07	5.73952e+07	5.14162e+07	4.76262e+07	4.89303e+07	4.34372e+07	4.53189e+07	4.03781e+07	4.36923e+07	4.20459e+07	4.16827e+07	4.90935e+07	5.11445e+07	4.86896e+07	4.97567e+07	5.23398e+07	5.34235e+07	5.39428e+07	5.26303e+07	5.51142e+07	4.71613e+07	5.00807e+07	5.15334e+07	4.60838e+07	5.19642e+07	5.09175e+07	4.61097e+07	4.69176e+07	4.61621e+07	GO:0050660, GO:0016491, GO:0022900, GO:0016627, GO:0006099	atr:18445831||http://www.genome.jp/dbget-bin/www_bget?atr:18445831	Citrate cycle (TCA cycle)
A2Q570	Beta-galactosidase	11441599	Beta-galactosidase OS=Medicago truncatula OX=3880 GN=11441599 PE=3 SV=1	0	155.244	28	18	119	14	726	81.5	8.56	380.2	5	1	2.37703e+08	1.55648e+08	1.80988e+08	7.44738e+07	9.29548e+07	7.83737e+07	6.93584e+07	6.35784e+07	9.80157e+07	6.6981e+07	9.01366e+07	9.2058e+07	8.20581e+07	8.65474e+07	7.97393e+07	1.85561e+08	1.47554e+08	1.61764e+08	9.54064e+07	1.04678e+08	9.89861e+07	9.53727e+07	9.54016e+07	1.07281e+08	9.53846e+07	1.05287e+08	1.04932e+08	9.35999e+07	9.47583e+07	9.22645e+07	GO:0004553, GO:0005975	atr:18429340||http://www.genome.jp/dbget-bin/www_bget?atr:18429340	---
G7IC40	Phosphoglucomutase (alpha-D-glucose-1,6-bisphosphate-dependent)	11414670	Phosphoglucomutase (alpha-D-glucose-1,6-bisphosphate-dependent) OS=Medicago truncatula OX=3880 GN=11414670 PE=3 SV=1	0	155.217	32	16	133	16	628	68.5	6.21	344.35	0	1	7.28345e+07	8.05645e+07	8.03766e+07	9.62494e+07	8.83075e+07	9.6159e+07	9.06641e+07	9.17439e+07	8.78327e+07	8.8676e+07	8.765e+07	8.749e+07	1.26525e+08	1.22848e+08	1.22196e+08	7.62689e+07	8.51056e+07	8.64842e+07	9.99383e+07	9.09028e+07	1.01137e+08	9.20623e+07	9.26346e+07	9.19899e+07	9.01235e+07	9.16474e+07	9.08121e+07	1.18174e+08	1.0457e+08	1.11575e+08	GO:0000287, GO:0071704, GO:0005975, GO:0016868	atr:18424241||http://www.genome.jp/dbget-bin/www_bget?atr:18424241	Galactose metabolism
A0A072UTA7	Pectinesterase	25491636	Pectinesterase OS=Medicago truncatula OX=3880 GN=25491636 PE=3 SV=1	0	154.622	32	14	191	13	509	55.7	9	567.48	2	1	1.88662e+08	1.75554e+08	1.90462e+08	1.17669e+08	1.27253e+08	1.19551e+08	1.14879e+08	1.14984e+08	1.45593e+08	1.14439e+08	1.40633e+08	1.37219e+08	7.08988e+07	7.3957e+07	7.22665e+07	1.98154e+08	1.74685e+08	1.99133e+08	1.11055e+08	1.26667e+08	1.21055e+08	1.122e+08	1.12583e+08	1.4948e+08	1.13004e+08	1.42023e+08	1.40406e+08	7.55128e+07	7.71499e+07	7.68546e+07	GO:0004857, GO:0042545, GO:0030599	atr:18429269||http://www.genome.jp/dbget-bin/www_bget?atr:18429269	Pentose and glucuronate interconversions
I3SKZ1	Peroxidase		Peroxidase OS=Medicago truncatula OX=3880 PE=2 SV=1	0	154.401	30	10	143	5	353	38.1	7.58	402.45	0	1	7.12458e+06	6.07829e+06	6.95014e+06	4.73433e+06	4.43517e+06	4.57187e+06	4.42256e+06	4.45978e+06	4.46343e+06	4.41367e+06	4.41639e+06	4.39103e+06	3.92877e+06	4.10703e+06	3.98491e+06	6.24635e+06	6.6492e+06	7.133e+06	5.13655e+06	4.62497e+06	4.74045e+06	4.11512e+06	4.22996e+06	4.59426e+06	4.21859e+06	4.61427e+06	4.41658e+06	3.23499e+06	3.32743e+06	3.33505e+06	GO:0042744, GO:0020037, GO:0004601, GO:0006979	atr:18439310||http://www.genome.jp/dbget-bin/www_bget?atr:18439310	Phenylpropanoid biosynthesis
G7IAN2	Tubulin beta chain	11425110	Tubulin beta chain OS=Medicago truncatula OX=3880 GN=11425110 PE=3 SV=1	0	154.063	41	17	112	1	449	50.5	4.83	337.44	24	1	1.87734e+08	1.78097e+08	1.95564e+08	1.45486e+08	1.42423e+08	1.47449e+08	1.61492e+08	1.64215e+08	1.49539e+08	1.52233e+08	1.4725e+08	1.46328e+08	1.13808e+08	1.18948e+08	1.15719e+08	1.8691e+08	1.85316e+08	1.95124e+08	1.52096e+08	1.52653e+08	1.54734e+08	1.66065e+08	1.64884e+08	1.55803e+08	1.62066e+08	1.50595e+08	1.47998e+08	1.20462e+08	1.21932e+08	1.22644e+08	GO:0005200, GO:0005525, GO:0007017, GO:0005874, GO:0003924	atr:18422898||http://www.genome.jp/dbget-bin/www_bget?atr:18422898	Phagosome
G7JQ29	S-adenosylmethionine synthase	11444997	S-adenosylmethionine synthase OS=Medicago truncatula OX=3880 GN=11444997 PE=2 SV=2	0	154.007	51	15	159	3	393	42.9	6.05	527.42	0	1	4.91841e+06	4.57698e+06	5.12591e+06	4.58421e+06	5.32407e+06	5.32748e+06	4.85867e+06	4.75182e+06	4.00088e+06	4.33631e+06	4.04655e+06	4.17605e+06	5.49632e+06	5.70555e+06	5.31207e+06	6.15832e+06	5.11752e+06	5.70355e+06	4.51839e+06	5.47808e+06	5.53721e+06	4.57094e+06	5.26194e+06	4.00043e+06	4.5309e+06	3.93241e+06	4.08852e+06	4.78233e+06	4.82356e+06	4.74075e+06	GO:0005524, GO:0006556, GO:0004478	atr:18430082||http://www.genome.jp/dbget-bin/www_bget?atr:18430082	Cysteine and methionine metabolism
B6DXD7	H(+)-exporting diphosphatase	VP1	H(+)-exporting diphosphatase OS=Medicago truncatula OX=3880 GN=VP1 PE=2 SV=1	0	153.952	18	15	116	14	765	80.1	5.27	357.73	1	1	6.01042e+07	5.7911e+07	5.79881e+07	7.47321e+07	8.03311e+07	8.22487e+07	8.31751e+07	8.58062e+07	7.19266e+07	7.77499e+07	7.0334e+07	7.12546e+07	9.68704e+07	9.75981e+07	9.56433e+07	5.84279e+07	6.18427e+07	6.14372e+07	7.88467e+07	8.35312e+07	9.17615e+07	8.85401e+07	8.63124e+07	7.8356e+07	8.24362e+07	7.56501e+07	7.79341e+07	9.20277e+07	9.15671e+07	9.06783e+07	GO:0009678, GO:0004427, GO:0016020, GO:1902600	atr:18442574||http://www.genome.jp/dbget-bin/www_bget?atr:18442574	---
G7I9C1	Pyruvate kinase	11429725	Pyruvate kinase OS=Medicago truncatula OX=3880 GN=11429725 PE=3 SV=1	0	153.754	43	20	126	17	513	56	6.9	346.62	3	1	8.47718e+07	8.47683e+07	8.47445e+07	9.11694e+07	8.16342e+07	8.19488e+07	8.16552e+07	8.11609e+07	8.43103e+07	8.2752e+07	9.10148e+07	8.75981e+07	1.01431e+08	1.03671e+08	1.03619e+08	8.804e+07	8.78131e+07	8.85461e+07	8.35507e+07	8.00499e+07	8.36545e+07	8.08201e+07	7.93325e+07	8.34534e+07	7.97091e+07	8.36658e+07	8.31618e+07	9.67537e+07	9.14651e+07	9.29003e+07	GO:0000287, GO:0004743, GO:0030955, GO:0003824, GO:0006096	atr:18441483||http://www.genome.jp/dbget-bin/www_bget?atr:18441483	Purine metabolism
Q84RD9	Adenosylhomocysteinase	AHC1	Adenosylhomocysteinase OS=Medicago truncatula OX=3880 GN=AHC1 PE=3 SV=1	0	153.352	46	20	287	11	485	53.3	5.91	709.68	0	1	4.92396e+08	2.79691e+08	3.40362e+08	1.30547e+08	1.35901e+08	1.25875e+08	1.32841e+08	1.39935e+08	9.16182e+07	1.26042e+08	1.00042e+08	1.0376e+08	2.44275e+08	2.59229e+08	2.39735e+08	3.72499e+08	2.56641e+08	2.87951e+08	1.78044e+08	1.7667e+08	1.81032e+08	1.77444e+08	1.77133e+08	1.36357e+08	1.71569e+08	1.44946e+08	1.46396e+08	2.70568e+08	2.82481e+08	2.68996e+08	GO:0004013	atr:18438268||http://www.genome.jp/dbget-bin/www_bget?atr:18438268	Cysteine and methionine metabolism
G7L3W1	S-adenosylmethionine synthase	11432371	S-adenosylmethionine synthase OS=Medicago truncatula OX=3880 GN=11432371 PE=1 SV=2	0	152.064	44	13	159	2	390	42.6	6.84	515.49	3	1	6.0616e+06	5.81541e+06	6.08474e+06	5.77205e+06	6.12966e+06	5.84743e+06	6.86855e+06	6.37583e+06	4.79414e+06	6.94147e+06	5.14901e+06	4.93404e+06	6.16633e+06	6.61185e+06	6.11775e+06	5.80075e+06	4.97217e+06	5.25715e+06	4.50053e+06	5.331e+06	5.21802e+06	5.65758e+06	5.29147e+06	3.83506e+06	5.34738e+06	4.11928e+06	4.29045e+06	7.33934e+06	7.17429e+06	6.72484e+06	GO:0006556, GO:0004478, GO:0005524	atr:18445115||http://www.genome.jp/dbget-bin/www_bget?atr:18445115	Cysteine and methionine metabolism
Q56GA3	Geranylgeranyl reductase	MtrunA17_Chr4g0060791	Geranylgeranyl reductase OS=Medicago truncatula OX=3880 GN=MtrunA17_Chr4g0060791 PE=2 SV=1	0	152.036	50	21	90	21	462	51.1	8.88	280.74	0	1	4.01818e+07	3.87774e+07	4.08354e+07	3.6723e+07	3.89237e+07	3.94033e+07	4.44627e+07	4.38536e+07	3.4931e+07	4.37619e+07	3.5389e+07	3.47682e+07	5.0372e+07	5.22091e+07	4.96575e+07	3.82234e+07	3.76441e+07	3.75633e+07	3.86385e+07	3.9861e+07	4.10758e+07	4.26845e+07	4.23922e+07	3.65405e+07	4.19827e+07	3.66898e+07	3.65759e+07	4.96519e+07	4.58945e+07	4.9804e+07	GO:0015995, GO:0015979, GO:0016628, GO:0045550, GO:0016491	atr:110007115||http://www.genome.jp/dbget-bin/www_bget?atr:110007115	Terpenoid backbone biosynthesis
G7IU25	Phosphoenolpyruvate carboxylase	11413239	Phosphoenolpyruvate carboxylase OS=Medicago truncatula OX=3880 GN=11413239 PE=3 SV=1	0	151.43	33	28	112	16	966	110.4	6.15	317.97	0	1	9.29232e+06	9.11015e+06	9.13522e+06	9.7691e+06	9.73042e+06	1.02668e+07	1.04891e+07	1.02121e+07	8.86069e+06	9.93528e+06	9.23532e+06	9.1187e+06	1.19901e+07	1.27779e+07	1.18438e+07	8.76895e+06	8.98709e+06	8.57853e+06	8.77139e+06	9.63473e+06	1.00327e+07	1.00331e+07	1.04058e+07	8.80452e+06	9.5409e+06	8.73756e+06	8.61257e+06	1.12552e+07	1.14639e+07	1.12113e+07	GO:0006099, GO:0003824, GO:0008964, GO:0015977	atr:18442136||http://www.genome.jp/dbget-bin/www_bget?atr:18442136	Carbon metabolism
A0A072VFU7	Peroxidase	25486302	Peroxidase OS=Medicago truncatula OX=3880 GN=25486302 PE=3 SV=1	0	150.842	24	10	280	3	352	37.8	7.58	774.89	0	1	3.92085e+07	4.89808e+07	4.57623e+07	4.48244e+07	3.77302e+07	3.99455e+07	3.78013e+07	3.69548e+07	4.61524e+07	3.97212e+07	4.653e+07	4.64131e+07	3.01808e+07	3.10247e+07	3.10595e+07	4.4443e+07	4.95249e+07	4.85257e+07	4.26928e+07	3.70466e+07	3.9267e+07	3.69921e+07	3.93925e+07	4.93585e+07	3.77121e+07	4.83643e+07	5.08543e+07	3.28667e+07	3.44627e+07	3.4359e+07	GO:0006979, GO:0004601, GO:0020037, GO:0042744	atr:18439310||http://www.genome.jp/dbget-bin/www_bget?atr:18439310	Phenylpropanoid biosynthesis
A0A072V2Y5	DEAD-box ATP-dependent RNA helicase	MTR_4g125970	DEAD-box ATP-dependent RNA helicase OS=Medicago truncatula OX=3880 GN=MTR_4g125970 PE=3 SV=1	0	150.476	41	17	174	3	413	46.6	5.57	426.64	0	1	468259	584791	533977	770413	458107	552733	408067	346784	594803	422532	752340	666550	1.00146e+06	1.0127e+06	999403	467344	461420	468332	592307	619150	648344	664867	622488	810238	708529	980727	510996	450169	433641	443382	GO:0003676, GO:0005524, GO:0003724	atr:18443664||http://www.genome.jp/dbget-bin/www_bget?atr:18443664	RNA transport
I3SQJ7	Ribose-5-phosphate isomerase		Ribose-5-phosphate isomerase OS=Medicago truncatula OX=3880 PE=2 SV=1	0	150.473	39	8	97	8	280	29.9	5.59	311.89	0	1	1.19441e+08	1.46473e+08	1.62586e+08	8.59303e+07	7.85817e+07	7.42553e+07	6.17947e+07	5.9657e+07	6.22889e+07	6.06159e+07	6.44942e+07	6.47805e+07	1.01638e+08	1.06583e+08	1.02802e+08	1.10139e+08	1.43578e+08	1.59494e+08	8.43467e+07	8.20539e+07	8.2203e+07	6.69777e+07	6.78682e+07	7.0347e+07	6.51839e+07	7.36182e+07	7.09126e+07	9.86604e+07	9.33407e+07	9.63145e+07	GO:0009052, GO:0004751	atr:18429622||http://www.genome.jp/dbget-bin/www_bget?atr:18429622	Pentose phosphate pathway
G7L5V0	Tubulin beta chain	11422693	Tubulin beta chain OS=Medicago truncatula OX=3880 GN=11422693 PE=3 SV=1	0	150.399	36	16	117	3	449	50.5	4.83	347.31	0	1	1.83444e+07	1.84953e+07	1.94832e+07	1.97408e+07	1.75943e+07	1.86983e+07	2.19099e+07	2.20876e+07	1.65381e+07	1.9894e+07	1.60914e+07	1.67607e+07	1.97194e+07	2.10975e+07	1.86791e+07	1.93365e+07	1.99681e+07	2.05696e+07	2.03723e+07	1.73079e+07	1.94059e+07	2.12961e+07	2.0564e+07	2.14176e+07	2.287e+07	1.99441e+07	2.07581e+07	2.13684e+07	2.19391e+07	2.04042e+07	GO:0005200, GO:0005525, GO:0007017, GO:0005874, GO:0003924	atr:18422292||http://www.genome.jp/dbget-bin/www_bget?atr:18422292	Phagosome
G7KA64	Glycoside hydrolase family 3 protein	11436086	Glycoside hydrolase family 3 protein OS=Medicago truncatula OX=3880 GN=11436086 PE=3 SV=2	0	150.365	30	21	120	4	782	86	8.35	356.51	20	1	8.32912e+07	7.02902e+07	7.56874e+07	4.50974e+07	4.84493e+07	4.35885e+07	4.26777e+07	4.39861e+07	4.21755e+07	4.01158e+07	4.39195e+07	4.22548e+07	3.94097e+07	4.04591e+07	3.96066e+07	8.97682e+07	7.68284e+07	8.14266e+07	4.66404e+07	4.63285e+07	4.12379e+07	4.13959e+07	4.1957e+07	4.891e+07	4.14727e+07	5.06792e+07	4.89252e+07	4.04407e+07	4.15597e+07	4.17661e+07	GO:0005975, GO:0045493, GO:0009044, GO:0004553	atr:18421965||http://www.genome.jp/dbget-bin/www_bget?atr:18421965	---
A0A396JV50	Putative glycosidase	MtrunA17_Chr1g0207281	Putative glycosidase OS=Medicago truncatula OX=3880 GN=MtrunA17_Chr1g0207281 PE=3 SV=1	0	150.013	23	18	119	17	797	87.2	7.53	379.68	1	1	1.34733e+08	1.00722e+08	1.15568e+08	8.01635e+07	9.58481e+07	9.0641e+07	8.58495e+07	8.47519e+07	7.54219e+07	7.95904e+07	7.34095e+07	7.29756e+07	5.10625e+07	4.64689e+07	4.97234e+07	1.36223e+08	1.02636e+08	1.16794e+08	8.15789e+07	9.76778e+07	9.54372e+07	8.20709e+07	8.31248e+07	8.34742e+07	7.91056e+07	8.09299e+07	8.02468e+07	4.36216e+07	4.42973e+07	4.55982e+07	GO:0005975, GO:0004553, GO:0009044, GO:0045493	atr:18425469||http://www.genome.jp/dbget-bin/www_bget?atr:18425469	Amino sugar and nucleotide sugar metabolism
G7IMV1	Alpha-L-arabinofuranosidase/beta-D-xylosidase	11412498	Alpha-L-arabinofuranosidase/beta-D-xylosidase OS=Medicago truncatula OX=3880 GN=11412498 PE=3 SV=1	0	149.531	27	17	154	16	762	82.6	8.47	476.78	1	1	2.31686e+08	1.71789e+08	2.04609e+08	8.49136e+07	9.84614e+07	8.74776e+07	8.6381e+07	8.59546e+07	8.12804e+07	7.78874e+07	8.29482e+07	8.0583e+07	7.21104e+07	7.49761e+07	7.22071e+07	2.39871e+08	1.74492e+08	2.05569e+08	8.31685e+07	9.39036e+07	8.52331e+07	8.20113e+07	8.19192e+07	8.40173e+07	7.92232e+07	8.42887e+07	8.15484e+07	6.96143e+07	7.01283e+07	7.14965e+07	GO:0005975, GO:0004553, GO:0045493, GO:0009044	atr:18445086||http://www.genome.jp/dbget-bin/www_bget?atr:18445086	---
A0A072VJR8	60S ribosomal L4-like protein	25484054	60S ribosomal L4-like protein OS=Medicago truncatula OX=3880 GN=25484054 PE=3 SV=1	0	149.515	38	15	117	5	405	44.6	10.37	338.82	1	1	1.96324e+07	2.43264e+07	2.42889e+07	2.13602e+07	2.0255e+07	1.94687e+07	1.86882e+07	1.95188e+07	1.69527e+07	1.91265e+07	1.92678e+07	2.03884e+07	6.76019e+07	4.68742e+07	6.07495e+07	2.04845e+07	2.54277e+07	2.61051e+07	1.99251e+07	1.90103e+07	1.95651e+07	1.68586e+07	1.77262e+07	1.79741e+07	1.71655e+07	2.02819e+07	2.09358e+07	6.78895e+07	5.05141e+07	5.92245e+07	GO:0003735, GO:0005840, GO:0006412	atr:18428056||http://www.genome.jp/dbget-bin/www_bget?atr:18428056	Ribosome
A0A072UAG3	Oxidoreductase/transition metal ion-binding protein, putative	25496534	Oxidoreductase/transition metal ion-binding protein, putative OS=Medicago truncatula OX=3880 GN=25496534 PE=4 SV=1	0	148.747	25	21	82	21	957	105.5	4.86	254.33	0	1	2.9995e+07	3.0663e+07	3.10914e+07	3.6744e+07	3.7209e+07	3.98942e+07	3.79652e+07	3.79363e+07	2.98609e+07	3.57964e+07	2.97148e+07	2.98318e+07	3.27753e+07	3.39048e+07	3.27879e+07	3.38672e+07	3.32271e+07	3.44029e+07	3.52612e+07	3.61334e+07	3.85391e+07	3.39288e+07	3.36486e+07	2.88817e+07	3.35858e+07	2.90466e+07	2.88225e+07	3.25528e+07	3.29935e+07	3.21677e+07	---	atr:18422877||http://www.genome.jp/dbget-bin/www_bget?atr:18422877	---
G7LIN7	Tubulin alpha chain	11408319	Tubulin alpha chain OS=Medicago truncatula OX=3880 GN=11408319 PE=3 SV=1	0	148.597	50	18	151	5	449	49.5	5.14	394.13	16	1	1.44601e+08	1.35897e+08	1.53118e+08	1.04624e+08	1.03062e+08	9.79634e+07	1.04965e+08	1.05381e+08	1.07902e+08	1.02332e+08	1.0783e+08	1.06741e+08	1.10048e+08	1.16073e+08	1.10368e+08	1.48069e+08	1.42306e+08	1.57027e+08	1.08126e+08	1.08689e+08	1.13345e+08	1.17275e+08	1.13711e+08	1.09566e+08	1.11238e+08	1.0619e+08	1.05162e+08	1.15549e+08	1.19351e+08	1.15055e+08	GO:0005874, GO:0003924, GO:0007017, GO:0005200, GO:0005525	atr:18448826||http://www.genome.jp/dbget-bin/www_bget?atr:18448826	Phagosome
A0A396H1S7	Alpha-galactosidase	MtrunA17_Chr7g0245121	Alpha-galactosidase OS=Medicago truncatula OX=3880 GN=MtrunA17_Chr7g0245121 PE=3 SV=1	0	148.587	41	15	130	7	408	45.4	8.03	377.11	9	1	2.80564e+08	2.0046e+08	2.31307e+08	9.98763e+07	1.14287e+08	9.89543e+07	9.76374e+07	9.56776e+07	1.00329e+08	9.32309e+07	9.86655e+07	9.75376e+07	6.74578e+07	6.97407e+07	6.84908e+07	2.55499e+08	1.98776e+08	2.23968e+08	1.11228e+08	1.25332e+08	1.115e+08	1.06493e+08	1.08271e+08	1.14332e+08	1.03827e+08	1.10663e+08	1.0931e+08	7.04698e+07	7.28398e+07	7.26425e+07	GO:0004553, GO:0003824, GO:0005975	atr:18438394||http://www.genome.jp/dbget-bin/www_bget?atr:18438394	Glycosphingolipid biosynthesis - globo and isoglobo series
G7JCU3	Peroxidase	11405719	Peroxidase OS=Medicago truncatula OX=3880 GN=11405719 PE=3 SV=1	0	148.5	48	14	93	13	323	35.4	8.92	315.15	1	1	7.40797e+07	7.90016e+07	8.50048e+07	5.06033e+07	4.81242e+07	4.49108e+07	4.49516e+07	4.43334e+07	4.98016e+07	4.57389e+07	5.17708e+07	5.06872e+07	6.93441e+07	7.14809e+07	6.90554e+07	8.67224e+07	8.96323e+07	1.00588e+08	4.40779e+07	4.36142e+07	3.74478e+07	3.68213e+07	3.60737e+07	4.43891e+07	3.67794e+07	4.66535e+07	4.69101e+07	7.46787e+07	7.46826e+07	7.42939e+07	GO:0004601, GO:0006979, GO:0020037, GO:0042744	atr:18435586||http://www.genome.jp/dbget-bin/www_bget?atr:18435586	Phenylpropanoid biosynthesis
Q4KU02	Purple acid phosphatase	PAP1	Purple acid phosphatase OS=Medicago truncatula OX=3880 GN=PAP1 PE=2 SV=1	0	148.209	42	14	85	14	465	53.8	7.24	274.07	0	1	1.07497e+08	9.83898e+07	1.04785e+08	7.96991e+07	7.94759e+07	7.88741e+07	6.95835e+07	7.12674e+07	9.41325e+07	7.19924e+07	9.32597e+07	9.08879e+07	6.6993e+07	6.60887e+07	6.64284e+07	1.14087e+08	9.92922e+07	1.13878e+08	6.95395e+07	7.69247e+07	7.41567e+07	6.21455e+07	6.11476e+07	9.13368e+07	6.13024e+07	8.74101e+07	8.25549e+07	6.04713e+07	6.12005e+07	6.10022e+07	GO:0046872, GO:0003993, GO:0016787	atr:18429351||http://www.genome.jp/dbget-bin/www_bget?atr:18429351	---
I3SIG9	Chlorophyll a-b binding protein, chloroplastic	25493394	Chlorophyll a-b binding protein, chloroplastic OS=Medicago truncatula OX=3880 GN=25493394 PE=2 SV=1	0	148.025	42	9	782	4	266	28.3	5.66	2265.24	6	1	1.8673e+09	1.89508e+09	2.02631e+09	2.20578e+09	2.29167e+09	2.54497e+09	2.29887e+09	2.10085e+09	2.92924e+09	2.23068e+09	2.67002e+09	2.71884e+09	1.3635e+09	1.45476e+09	1.3655e+09	1.89615e+09	1.93245e+09	2.04399e+09	2.21409e+09	2.35745e+09	2.53313e+09	2.21346e+09	2.07114e+09	3.04087e+09	2.12131e+09	2.64246e+09	2.78713e+09	1.41354e+09	1.45758e+09	1.40427e+09	GO:0009765, GO:0016020	atr:18446791||http://www.genome.jp/dbget-bin/www_bget?atr:18446791	Photosynthesis - antenna proteins
G7K8Y3	Formyltetrahydrofolate synthetase	MTR_5g059390	Formyltetrahydrofolate synthetase OS=Medicago truncatula OX=3880 GN=MTR_5g059390 PE=3 SV=2	0	147.573	29	17	82	17	627	66.6	6.8	269.17	0	1	3.73595e+07	3.92673e+07	4.07092e+07	4.16347e+07	3.93565e+07	4.1218e+07	3.78954e+07	3.7305e+07	3.01521e+07	3.58668e+07	3.13468e+07	3.15076e+07	5.35926e+07	5.19057e+07	5.18029e+07	3.63389e+07	3.40246e+07	3.42573e+07	3.92329e+07	4.19128e+07	4.38492e+07	4.40501e+07	4.44285e+07	3.20775e+07	4.22987e+07	3.19432e+07	3.27542e+07	5.02925e+07	4.47103e+07	4.85575e+07	GO:0005524, GO:0004329	atr:18439312||http://www.genome.jp/dbget-bin/www_bget?atr:18439312	One carbon pool by folate
A0A072VR00	D-3-phosphoglycerate dehydrogenase	25485421	D-3-phosphoglycerate dehydrogenase OS=Medicago truncatula OX=3880 GN=25485421 PE=3 SV=1	0	147.379	28	16	127	16	597	62.9	6.34	360.97	0	1	3.797e+07	3.51537e+07	3.47798e+07	3.7058e+07	4.22861e+07	4.21074e+07	4.47211e+07	4.59109e+07	3.26181e+07	4.30617e+07	3.33665e+07	3.31887e+07	4.78432e+07	4.57258e+07	4.66261e+07	4.11847e+07	3.84476e+07	3.74712e+07	4.09902e+07	4.32843e+07	4.33352e+07	4.66375e+07	4.59217e+07	3.5279e+07	4.33752e+07	3.49464e+07	3.41961e+07	4.94994e+07	5.15964e+07	4.94636e+07	GO:0004617, GO:0016616, GO:0006564, GO:0051287	atr:18444981||http://www.genome.jp/dbget-bin/www_bget?atr:18444981	Cysteine and methionine metabolism
A0A396GY52	Putative leucine-rich repeat-containing, plant-type, leucine-rich repeat domain, L	MtrunA17_Chr7g0227231	Putative leucine-rich repeat-containing, plant-type, leucine-rich repeat domain, L OS=Medicago truncatula OX=3880 GN=MtrunA17_Chr7g0227231 PE=4 SV=1	0	146.85	26	7	130	4	406	45.2	8.09	450.03	9	1	7.51001e+07	6.26413e+07	7.06231e+07	5.33318e+07	6.03469e+07	5.84503e+07	5.87772e+07	5.79454e+07	7.9436e+07	5.6882e+07	7.58199e+07	7.21096e+07	4.73923e+07	4.87042e+07	4.63879e+07	7.67078e+07	6.59365e+07	7.43579e+07	5.43807e+07	6.27861e+07	6.25601e+07	5.90358e+07	5.82059e+07	8.31785e+07	5.85939e+07	7.67236e+07	7.33322e+07	4.85689e+07	4.79744e+07	4.82603e+07	GO:0005515	atr:18439873||http://www.genome.jp/dbget-bin/www_bget?atr:18439873	---
A0A072UXA0	Peroxidase	25491018	Peroxidase OS=Medicago truncatula OX=3880 GN=25491018 PE=3 SV=1	0	145.752	35	9	151	8	320	34.7	9.44	519	0	1	3.45788e+08	3.11805e+08	3.52401e+08	2.19277e+08	2.58361e+08	2.36334e+08	2.05058e+08	2.13025e+08	1.93186e+08	1.96244e+08	1.85137e+08	1.79881e+08	1.1774e+08	1.24524e+08	1.20755e+08	3.63979e+08	3.40795e+08	3.87695e+08	2.33984e+08	2.58165e+08	2.38183e+08	1.96733e+08	2.03191e+08	1.77233e+08	1.96173e+08	1.77301e+08	1.72958e+08	1.20513e+08	1.22923e+08	1.22423e+08	GO:0042744, GO:0020037, GO:0004601, GO:0006979	atr:18433598||http://www.genome.jp/dbget-bin/www_bget?atr:18433598	Phenylpropanoid biosynthesis
G7IU67	Carboxypeptidase	11416083	Carboxypeptidase OS=Medicago truncatula OX=3880 GN=11416083 PE=3 SV=1	0	145.615	27	12	121	11	511	57.3	5.53	378.2	2	1	1.12183e+08	9.0076e+07	1.04517e+08	6.48048e+07	7.55101e+07	6.53095e+07	6.80534e+07	6.83444e+07	6.18487e+07	6.79841e+07	6.23121e+07	5.91967e+07	4.60052e+07	4.69587e+07	4.74077e+07	1.27979e+08	9.15123e+07	1.05338e+08	5.80724e+07	6.966e+07	6.54635e+07	6.5148e+07	6.46407e+07	5.51019e+07	6.19207e+07	5.21396e+07	5.10488e+07	3.55628e+07	3.56732e+07	3.58262e+07	GO:0004185, GO:0006508	atr:18441094||http://www.genome.jp/dbget-bin/www_bget?atr:18441094	---
A0A072U2G7	NAD-dependent aldehyde dehydrogenase family protein	MTR_8g064170	NAD-dependent aldehyde dehydrogenase family protein OS=Medicago truncatula OX=3880 GN=MTR_8g064170 PE=3 SV=1	0	145.368	31	18	93	14	541	58.6	7.77	302.8	4	1	8.43906e+07	8.29006e+07	8.50222e+07	8.59908e+07	8.73496e+07	9.11098e+07	9.16145e+07	9.29744e+07	7.98457e+07	9.3046e+07	8.23227e+07	8.36758e+07	1.19345e+08	1.1317e+08	1.17726e+08	8.66752e+07	8.27044e+07	8.50643e+07	8.18512e+07	8.64102e+07	8.87467e+07	9.44607e+07	9.47874e+07	9.42716e+07	9.59972e+07	9.13573e+07	9.49083e+07	1.11903e+08	1.04018e+08	1.06951e+08	GO:0016620, GO:0016491	atr:18434098||http://www.genome.jp/dbget-bin/www_bget?atr:18434098	Lysine degradation
G7J3X9	14-3-3-like protein A	11424391	14-3-3-like protein A OS=Medicago truncatula OX=3880 GN=11424391 PE=3 SV=2	0	145.334	62	15	181	8	260	29.3	4.79	542.82	0	1	4.16341e+07	3.14316e+07	3.13264e+07	3.7224e+07	4.56334e+07	4.44253e+07	4.83426e+07	4.8494e+07	4.07424e+07	5.04367e+07	4.00449e+07	4.10831e+07	4.51181e+07	4.67625e+07	4.41044e+07	4.03389e+07	3.48621e+07	3.51015e+07	3.90799e+07	4.50116e+07	4.56864e+07	4.59215e+07	4.67902e+07	4.38111e+07	4.7415e+07	4.242e+07	4.37533e+07	5.39141e+07	5.67715e+07	5.42779e+07	---	atr:18442778||http://www.genome.jp/dbget-bin/www_bget?atr:18442778	---
I3SIM4	Malic enzyme		Malic enzyme OS=Medicago truncatula OX=3880 PE=2 SV=1	0	145.072	30	16	99	1	591	65.3	6.01	316.91	0	1	729745	968111	1.00336e+06	1.18422e+06	925208	1.01883e+06	898876	888666	940228	912649	953273	977978	1.34445e+06	1.41001e+06	1.33669e+06	744208	985665	1.05039e+06	674516	607542	631601	504539	527512	487952	474190	547911	565956	2.72163e+06	1.00646e+06	1.91432e+06	GO:0004470, GO:0051287, GO:0004471	atr:18443418||http://www.genome.jp/dbget-bin/www_bget?atr:18443418	Carbon metabolism
A0A072VAY8	NADPH-protochlorophyllide oxidoreductase	25487370	NADPH-protochlorophyllide oxidoreductase OS=Medicago truncatula OX=3880 GN=25487370 PE=3 SV=1	0	144.961	34	14	81	14	399	43	9.07	297.29	0	1	5.82144e+07	5.17282e+07	5.54115e+07	5.55216e+07	6.78525e+07	6.8108e+07	5.49701e+07	5.60501e+07	5.18164e+07	5.20406e+07	5.09087e+07	5.19276e+07	6.91892e+07	7.14647e+07	6.79545e+07	6.37898e+07	5.35509e+07	5.77076e+07	5.79761e+07	7.07791e+07	7.22105e+07	5.5321e+07	5.54107e+07	5.22783e+07	5.34214e+07	5.14552e+07	5.28377e+07	7.06231e+07	7.15557e+07	6.89273e+07	GO:0016630, GO:0016491	atr:18423162||http://www.genome.jp/dbget-bin/www_bget?atr:18423162	Porphyrin and chlorophyll metabolism
A0A072UIN9	26S proteasome regulatory particle triple-A ATPase protein	25491789	26S proteasome regulatory particle triple-A ATPase protein OS=Medicago truncatula OX=3880 GN=25491789 PE=3 SV=1	0	144.852	36	15	68	14	424	47.5	5.11	210.07	0	1	1.57866e+07	1.62803e+07	1.65416e+07	1.538e+07	1.467e+07	1.51077e+07	1.50101e+07	1.43597e+07	1.79425e+07	1.52902e+07	1.82141e+07	1.77434e+07	1.77889e+07	1.84825e+07	1.74556e+07	1.49185e+07	1.62074e+07	1.65516e+07	1.51641e+07	1.41617e+07	1.52168e+07	1.48608e+07	1.42234e+07	1.80468e+07	1.48578e+07	1.8673e+07	1.78978e+07	1.84527e+07	1.87303e+07	1.83742e+07	GO:0005737, GO:0036402, GO:0005524, GO:0030163, GO:0016887	atr:18439693||http://www.genome.jp/dbget-bin/www_bget?atr:18439693	Proteasome
G7JCF2	Plastid transcriptionally active protein	11416800	Plastid transcriptionally active protein OS=Medicago truncatula OX=3880 GN=11416800 PE=4 SV=2	0	144.723	30	18	93	14	553	59.9	8.24	286.57	4	1	5.49887e+07	6.82587e+07	6.79984e+07	8.47585e+07	7.63931e+07	8.66886e+07	7.37501e+07	7.5361e+07	7.16904e+07	7.14101e+07	7.01018e+07	7.23685e+07	1.06744e+08	1.03562e+08	1.05137e+08	5.09042e+07	6.82491e+07	6.42169e+07	8.70964e+07	7.69111e+07	8.71041e+07	7.62585e+07	7.23008e+07	8.98324e+07	7.48446e+07	9.02691e+07	9.01042e+07	1.15769e+08	1.07333e+08	1.08668e+08	---	atr:18436253||http://www.genome.jp/dbget-bin/www_bget?atr:18436253	---
G7IMZ3	ABA-responsive protein	11420053	ABA-responsive protein OS=Medicago truncatula OX=3880 GN=11420053 PE=3 SV=1	0	144.51	62	10	178	3	157	16.6	5.07	524.93	9	1	3.6072e+08	4.26571e+08	4.98184e+08	1.44543e+08	1.48762e+08	1.13581e+08	9.75401e+07	9.56021e+07	8.74562e+07	9.42266e+07	1.04223e+08	1.03908e+08	2.40514e+08	2.46314e+08	2.38522e+08	3.68881e+08	4.27585e+08	4.92795e+08	1.34359e+08	1.39255e+08	1.08623e+08	9.41759e+07	9.3463e+07	7.74e+07	8.72578e+07	8.94559e+07	8.9439e+07	2.37687e+08	2.44758e+08	2.35653e+08	GO:0006952, GO:0004864, GO:0010427, GO:0038023, GO:0009738	atr:18431342||http://www.genome.jp/dbget-bin/www_bget?atr:18431342	---
A0A396INR9	Leucyl-tRNA synthetase	MtrunA17_Chr3g0101981	Leucyl-tRNA synthetase OS=Medicago truncatula OX=3880 GN=MtrunA17_Chr3g0101981 PE=3 SV=1	0	144.479	21	20	82	20	1127	127.4	6.86	240.54	0	1	4.09184e+07	4.26126e+07	4.37228e+07	3.65258e+07	3.6834e+07	3.60799e+07	3.60999e+07	3.56878e+07	3.94427e+07	3.73251e+07	3.93559e+07	3.90877e+07	3.71387e+07	3.77557e+07	3.69105e+07	3.80389e+07	3.98563e+07	3.99911e+07	4.15304e+07	3.89616e+07	4.21084e+07	3.93785e+07	3.90232e+07	4.44499e+07	3.95377e+07	4.39294e+07	4.41976e+07	3.74962e+07	3.77396e+07	3.81279e+07	GO:0004823, GO:0006418, GO:0002161, GO:0000166, GO:0004812, GO:0006429, GO:0005524	atr:18432028||http://www.genome.jp/dbget-bin/www_bget?atr:18432028	Aminoacyl-tRNA biosynthesis
I3STV1	Uncharacterized protein		Uncharacterized protein OS=Medicago truncatula OX=3880 PE=2 SV=1	0	144.34	44	8	75	8	254	27.1	9.03	224.12	0	1	2.31643e+07	2.19839e+07	2.39576e+07	1.74617e+07	1.82571e+07	1.83639e+07	1.79335e+07	1.80678e+07	1.64125e+07	1.85246e+07	1.78152e+07	1.94739e+07	5.16202e+07	4.22199e+07	4.72356e+07	1.99107e+07	2.09274e+07	2.12151e+07	2.07051e+07	1.97907e+07	2.07001e+07	1.98614e+07	1.98988e+07	2.07579e+07	2.04298e+07	2.19691e+07	2.30277e+07	5.14351e+07	4.22181e+07	4.68406e+07	GO:0005524, GO:0016887, GO:1901671, GO:0046914, GO:0006457	atr:18433753||http://www.genome.jp/dbget-bin/www_bget?atr:18433753	---
G7JCK0	Ketol-acid reductoisomerase	11418347	Ketol-acid reductoisomerase OS=Medicago truncatula OX=3880 GN=11418347 PE=3 SV=1	0	144.224	25	13	118	11	580	62.9	6.76	357.81	3	1	8.72871e+07	9.73794e+07	9.61194e+07	9.58027e+07	9.09161e+07	9.54391e+07	9.44155e+07	9.61159e+07	8.71493e+07	9.1357e+07	9.09295e+07	9.01499e+07	1.63208e+08	1.4821e+08	1.57576e+08	9.13233e+07	8.83871e+07	9.0144e+07	9.69744e+07	1.0037e+08	1.03718e+08	1.0484e+08	1.04649e+08	8.91765e+07	1.02505e+08	8.82045e+07	8.80414e+07	1.47159e+08	1.30624e+08	1.3803e+08	GO:0004455, GO:0009082, GO:0016491	atr:18442150||http://www.genome.jp/dbget-bin/www_bget?atr:18442150	Pantothenate and CoA biosynthesis
G7J4B5	Inositol-3-phosphate synthase	11422703	Inositol-3-phosphate synthase OS=Medicago truncatula OX=3880 GN=11422703 PE=3 SV=1	0	143.452	35	16	84	4	510	56.5	5.66	280.29	0	1	1.58125e+07	1.51959e+07	1.55419e+07	1.58778e+07	1.73122e+07	1.64251e+07	1.72916e+07	1.76915e+07	1.35602e+07	1.66071e+07	1.45285e+07	1.40072e+07	2.35003e+07	2.42459e+07	2.32571e+07	1.43733e+07	1.36332e+07	1.33355e+07	1.48369e+07	1.65623e+07	1.71824e+07	1.63385e+07	1.61152e+07	1.20655e+07	1.67047e+07	1.24621e+07	1.29544e+07	2.37306e+07	2.43707e+07	2.32704e+07	GO:0004512, GO:0008654, GO:0006021	atr:18422109||http://www.genome.jp/dbget-bin/www_bget?atr:18422109	Inositol phosphate metabolism
G7KGF6	Putative oligopeptidase A	11405457	Putative oligopeptidase A OS=Medicago truncatula OX=3880 GN=11405457 PE=3 SV=2	0	143.418	30	24	114	24	786	88.7	6.28	332.04	0	1	3.13495e+07	3.18506e+07	3.16493e+07	3.64435e+07	3.60863e+07	3.8538e+07	3.62236e+07	3.61114e+07	3.25634e+07	3.62283e+07	3.32901e+07	3.34027e+07	6.11115e+07	6.2318e+07	6.02782e+07	3.63941e+07	3.71028e+07	3.69979e+07	4.1225e+07	4.05801e+07	4.30135e+07	3.99943e+07	4.0588e+07	3.50854e+07	3.89615e+07	3.60753e+07	3.55827e+07	5.42316e+07	5.06229e+07	5.43447e+07	GO:0008233, GO:0004222, GO:0006508	atr:18446438||http://www.genome.jp/dbget-bin/www_bget?atr:18446438	---
A0A072UU27	F0F1 ATP synthase subunit gamma	25494273	F0F1 ATP synthase subunit gamma OS=Medicago truncatula OX=3880 GN=25494273 PE=3 SV=1	0	143.354	50	15	102	15	327	35.5	9.2	303.67	0	1	4.10758e+07	4.5745e+07	4.65705e+07	4.76222e+07	4.20727e+07	4.24122e+07	4.26828e+07	4.2008e+07	3.92459e+07	4.04367e+07	4.08301e+07	4.01555e+07	5.81678e+07	5.53104e+07	5.62905e+07	3.73375e+07	5.03399e+07	4.63355e+07	5.85326e+07	4.40384e+07	4.87179e+07	4.3945e+07	4.38561e+07	4.46028e+07	4.27157e+07	4.99528e+07	4.71137e+07	6.19064e+07	6.33476e+07	6.23467e+07	GO:0045261, GO:0046933, GO:0015986	atr:18434683||http://www.genome.jp/dbget-bin/www_bget?atr:18434683	Oxidative phosphorylation
A0A396JKB1	Putative ribosomal protein L4/L1e	MtrunA17_Chr1g0168531	Putative ribosomal protein L4/L1e OS=Medicago truncatula OX=3880 GN=MtrunA17_Chr1g0168531 PE=3 SV=1	0	143.334	38	15	85	2	451	50.1	10.45	263.56	17	1	3.491e+07	3.40995e+07	3.43511e+07	3.44404e+07	3.5226e+07	3.62938e+07	4.36199e+07	3.76503e+07	6.41215e+07	4.72174e+07	5.82967e+07	6.02622e+07	8.46665e+07	8.18778e+07	7.95787e+07	3.34848e+07	3.45323e+07	3.41203e+07	3.45906e+07	3.57412e+07	3.64335e+07	4.42709e+07	3.88016e+07	5.14638e+07	4.42159e+07	4.83875e+07	4.79438e+07	9.56053e+07	8.31191e+07	8.8673e+07	GO:0003735, GO:0005840, GO:0006412	atr:18428056||http://www.genome.jp/dbget-bin/www_bget?atr:18428056	Ribosome
I3S399	Putative SOUL heme-binding protein	25502484	Putative SOUL heme-binding protein OS=Medicago truncatula OX=3880 GN=25502484 PE=2 SV=1	0	143.148	44	11	175	11	227	25.3	5.92	546.92	0	1	5.49222e+08	5.6045e+08	6.0056e+08	4.34802e+08	4.26032e+08	4.23558e+08	3.38264e+08	3.48177e+08	3.05222e+08	3.3689e+08	3.04192e+08	3.06107e+08	2.07351e+08	2.13775e+08	2.12274e+08	5.7724e+08	5.71736e+08	6.24639e+08	4.36939e+08	4.41365e+08	4.37422e+08	3.60262e+08	3.59392e+08	3.16814e+08	3.36582e+08	3.02794e+08	3.09975e+08	1.95149e+08	1.98559e+08	1.98437e+08	---	atr:18445851||http://www.genome.jp/dbget-bin/www_bget?atr:18445851	---
G7LEC0	Lectin kinase family protein	11430405	Lectin kinase family protein OS=Medicago truncatula OX=3880 GN=11430405 PE=4 SV=2	0	142.989	27	10	96	9	452	50.3	6.76	371.1	1	1	7.79294e+07	7.91509e+07	8.34138e+07	6.3178e+07	6.83728e+07	6.70172e+07	6.0489e+07	5.91092e+07	8.71404e+07	5.83988e+07	8.75427e+07	7.77368e+07	5.91827e+07	5.32859e+07	5.60268e+07	7.20661e+07	7.80144e+07	8.3732e+07	6.80562e+07	6.7642e+07	7.02734e+07	6.02236e+07	5.8247e+07	9.16067e+07	5.89788e+07	8.37349e+07	8.11737e+07	6.31083e+07	5.5679e+07	5.96535e+07	---	atr:18439818||http://www.genome.jp/dbget-bin/www_bget?atr:18439818	---
G7K5Z4	Serine hydroxymethyltransferase	11429401	Serine hydroxymethyltransferase OS=Medicago truncatula OX=3880 GN=11429401 PE=3 SV=1	0	142.859	32	13	158	4	507	56.2	7.69	407.1	0	1	3.04284e+06	3.37124e+06	3.46511e+06	3.82302e+06	3.48939e+06	3.83878e+06	3.2513e+06	3.33594e+06	3.62916e+06	3.3351e+06	3.4871e+06	3.60503e+06	2.56112e+06	2.66021e+06	2.59321e+06	3.92249e+06	4.16845e+06	4.09163e+06	3.89561e+06	3.51707e+06	3.80498e+06	3.88669e+06	3.78791e+06	3.33969e+06	3.68977e+06	3.44645e+06	3.42464e+06	2.96513e+06	3.10533e+06	3.03542e+06	GO:0030170, GO:0003824, GO:0035999, GO:0019264, GO:0004372	atr:18446429||http://www.genome.jp/dbget-bin/www_bget?atr:18446429	Cyanoamino acid metabolism
A0A072VC17	Amino-terminal acetyltransferase, putative	MTR_2g102435	Amino-terminal acetyltransferase, putative OS=Medicago truncatula OX=3880 GN=MTR_2g102435 PE=4 SV=1	0	141.948	24	20	84	17	854	97.8	7.11	208.08	4	1	2.45782e+07	2.47684e+07	2.49153e+07	2.62646e+07	2.62036e+07	2.61812e+07	2.75503e+07	2.76016e+07	2.30656e+07	2.63018e+07	2.35393e+07	2.30852e+07	2.31525e+07	2.40692e+07	2.32382e+07	2.5021e+07	2.5316e+07	2.58747e+07	2.64153e+07	2.70665e+07	2.84968e+07	2.77041e+07	2.76124e+07	2.39719e+07	2.71303e+07	2.34844e+07	2.35099e+07	1.92796e+07	2.00685e+07	1.92808e+07	GO:0005515	atr:18434264||http://www.genome.jp/dbget-bin/www_bget?atr:18434264	---
E2FKJ2	Putative sieve element occlusion	SEO-F3	Putative sieve element occlusion OS=Medicago truncatula OX=3880 GN=SEO-F3 PE=2 SV=1	0	141.884	25	22	134	22	701	80.4	6.96	369.27	0	1	1.25564e+08	1.42985e+08	1.2778e+08	1.41576e+08	1.2654e+08	1.25628e+08	1.31892e+08	1.32087e+08	1.62103e+08	1.27865e+08	1.64888e+08	1.57839e+08	7.66632e+07	7.90177e+07	7.94746e+07	1.02419e+08	1.10896e+08	1.09518e+08	1.21307e+08	1.20249e+08	1.26759e+08	1.22743e+08	1.25006e+08	1.28244e+08	1.1795e+08	1.24369e+08	1.20564e+08	7.58e+07	7.59174e+07	7.68468e+07	GO:0010088	atr:18438687||http://www.genome.jp/dbget-bin/www_bget?atr:18438687	---
A0A072U5F0	Putative translational activator Gcn1, TOG domain-containing protein	25499723	Putative translational activator Gcn1, TOG domain-containing protein OS=Medicago truncatula OX=3880 GN=25499723 PE=3 SV=1	0	141.366	12	33	86	33	2632	287.5	7.09	234.72	0	1	3.39886e+07	3.28698e+07	3.22443e+07	3.06014e+07	3.16587e+07	3.17785e+07	3.35401e+07	3.3226e+07	3.16811e+07	3.23747e+07	3.12997e+07	3.10302e+07	2.40943e+07	2.50455e+07	2.422e+07	3.55373e+07	3.91462e+07	3.56249e+07	2.99277e+07	3.13534e+07	3.09802e+07	3.20147e+07	3.21812e+07	3.19484e+07	3.25096e+07	3.23253e+07	3.15387e+07	2.47397e+07	2.47862e+07	2.48684e+07	GO:0019887, GO:0043022, GO:0019901, GO:0006417, GO:0033674	atr:18444148||http://www.genome.jp/dbget-bin/www_bget?atr:18444148	---
A0A072U1Q8	D-fructose-1,6-bisphosphate 1-phosphohydrolase	25498664	D-fructose-1,6-bisphosphate 1-phosphohydrolase OS=Medicago truncatula OX=3880 GN=25498664 PE=3 SV=1	0	141.015	32	13	102	13	411	44.7	5.31	341.03	0	1	1.25135e+08	1.20286e+08	1.40136e+08	5.72522e+07	6.2186e+07	4.87988e+07	4.71044e+07	4.93029e+07	4.78796e+07	4.82441e+07	5.47577e+07	5.43976e+07	1.81827e+08	1.68282e+08	1.72371e+08	1.20191e+08	1.24498e+08	1.4376e+08	6.36385e+07	6.30997e+07	5.54388e+07	5.39171e+07	5.16997e+07	5.67416e+07	5.30684e+07	6.21485e+07	6.33001e+07	1.86093e+08	1.40321e+08	1.67353e+08	GO:0005975, GO:0042578, GO:0042132, GO:0016791	atr:18437775||http://www.genome.jp/dbget-bin/www_bget?atr:18437775	Fructose and mannose metabolism
A0A072TKG5	ATP synthase subunit alpha	MTR_0002s0550	ATP synthase subunit alpha OS=Medicago truncatula OX=3880 GN=MTR_0002s0550 PE=3 SV=1	0	141.011	16	6	198	1	504	55.1	6.48	694.8	0	1	5.99203e+07	7.94203e+07	8.31397e+07	8.73155e+07	6.9282e+07	8.20848e+07	6.58325e+07	6.76432e+07	5.30156e+07	6.66605e+07	5.66355e+07	5.35695e+07	7.69011e+07	7.91639e+07	7.73977e+07	6.27013e+07	7.46197e+07	7.94833e+07	9.09979e+07	7.28105e+07	8.70035e+07	6.81006e+07	7.39843e+07	5.30263e+07	6.66541e+07	5.88138e+07	5.49129e+07	7.76776e+07	7.87795e+07	7.88796e+07	GO:0032559, GO:1902600, GO:0045261, GO:0046933, GO:0046034, GO:0005524, GO:0015986	atr:2546497|atpA, AmtrCp007|http://www.genome.jp/dbget-bin/www_bget?atr:2546497	Photosynthesis
Q2HU14	(1->3)-beta-glucan endohydrolase	MtrDRAFT_AC149491g12v2	(1->3)-beta-glucan endohydrolase OS=Medicago truncatula OX=3880 GN=MtrDRAFT_AC149491g12v2 PE=2 SV=1	0	140.924	28	8	141	3	362	40.3	8.72	463.63	8	1	1.05788e+08	1.08174e+08	1.23376e+08	6.01677e+07	6.45743e+07	5.69989e+07	5.55447e+07	5.58651e+07	9.57354e+07	5.31176e+07	9.96247e+07	7.55115e+07	4.54298e+07	4.40015e+07	4.76451e+07	1.07684e+08	1.11893e+08	1.21817e+08	6.28816e+07	6.12563e+07	5.54905e+07	5.31491e+07	5.29045e+07	8.94152e+07	5.5335e+07	8.69613e+07	8.42543e+07	4.76562e+07	4.79845e+07	4.8611e+07	GO:0004553, GO:0005975	atr:18433300||http://www.genome.jp/dbget-bin/www_bget?atr:18433300	---
G7J013	Alanine--glyoxylate transaminase	11440516	Alanine--glyoxylate transaminase OS=Medicago truncatula OX=3880 GN=11440516 PE=3 SV=1	0	140.835	30	12	110	12	401	43.9	7.11	401.34	0	1	1.14553e+08	1.12415e+08	1.1631e+08	1.43013e+08	1.60323e+08	1.68966e+08	1.47935e+08	1.51343e+08	1.2373e+08	1.4543e+08	1.23892e+08	1.26561e+08	1.93488e+08	1.93337e+08	1.88293e+08	1.11424e+08	1.10267e+08	1.13347e+08	1.43504e+08	1.6336e+08	1.759e+08	1.52684e+08	1.53119e+08	1.19603e+08	1.37959e+08	1.17433e+08	1.17766e+08	1.99343e+08	2.0182e+08	1.98148e+08	GO:0003824	atr:18433220||http://www.genome.jp/dbget-bin/www_bget?atr:18433220	Peroxisome
A0A072TV74	40S ribosomal protein S2-4	11417021	40S ribosomal protein S2-4 OS=Medicago truncatula OX=3880 GN=11417021 PE=3 SV=1	0	140.313	46	13	106	1	270	29.6	10.2	354.82	0	1	2.18012e+06	2.38583e+06	2.3845e+06	2.32537e+06	2.36851e+06	2.35256e+06	2.38786e+06	2.46164e+06	2.06392e+06	2.39528e+06	2.24828e+06	2.40609e+06	7.02341e+06	3.4318e+06	5.47803e+06	2.78393e+06	2.38415e+06	2.66449e+06	2.36732e+06	2.46209e+06	2.62125e+06	2.35767e+06	2.43474e+06	1.91161e+06	2.06963e+06	2.102e+06	2.18026e+06	5.30148e+06	4.40652e+06	5.03574e+06	GO:0003735, GO:0015935, GO:0005840, GO:0003723, GO:0006412	atr:18429225||http://www.genome.jp/dbget-bin/www_bget?atr:18429225	Ribosome
G7I838	Endo-beta-mannosidase-like mannosylglycoprotein	11410041	Endo-beta-mannosidase-like mannosylglycoprotein OS=Medicago truncatula OX=3880 GN=11410041 PE=4 SV=2	0	140.193	20	18	98	12	966	109.4	6.83	274.1	7	1	8.66125e+07	6.83562e+07	7.55912e+07	4.45046e+07	5.06274e+07	4.70164e+07	5.07079e+07	4.82249e+07	4.90502e+07	4.90989e+07	4.72597e+07	4.76231e+07	4.4068e+07	4.5728e+07	4.37044e+07	8.24126e+07	7.25673e+07	7.71228e+07	5.04041e+07	5.39347e+07	5.023e+07	5.53534e+07	5.51704e+07	5.4015e+07	5.64167e+07	5.37006e+07	5.30793e+07	4.57099e+07	4.61395e+07	4.62767e+07	GO:0004553, GO:0033947, GO:0005975	atr:18440882||http://www.genome.jp/dbget-bin/www_bget?atr:18440882	---
G7JTD2	Putative ATPase, AAA-type, core, P-loop containing nucleoside triphosphate hydrolase	11412610	Putative ATPase, AAA-type, core, P-loop containing nucleoside triphosphate hydrolase OS=Medicago truncatula OX=3880 GN=11412610 PE=4 SV=1	0	140.074	37	14	206	7	476	52.1	5.62	561.1	0	1	5.82465e+06	5.44493e+06	5.52158e+06	3.89047e+06	3.99283e+06	3.68289e+06	4.01871e+06	4.07158e+06	3.66706e+06	4.13258e+06	3.96475e+06	4.13498e+06	1.15301e+07	1.18958e+07	1.14418e+07	5.45279e+06	5.36762e+06	5.0063e+06	4.75879e+06	5.07366e+06	4.72089e+06	6.84171e+06	6.67388e+06	4.71715e+06	6.81396e+06	5.2369e+06	5.26934e+06	1.06534e+07	1.0226e+07	1.00336e+07	GO:0016887, GO:0005524	atr:18436244||http://www.genome.jp/dbget-bin/www_bget?atr:18436244	---
G7JGP9	Cytosol aminopeptidase family protein	11439557	Cytosol aminopeptidase family protein OS=Medicago truncatula OX=3880 GN=11439557 PE=3 SV=1	0	139.782	33	15	84	13	567	59.6	7.71	266.33	3	1	3.37296e+07	3.32492e+07	3.42901e+07	2.99277e+07	3.14452e+07	3.10745e+07	3.02645e+07	3.07936e+07	2.55839e+07	2.95217e+07	2.75162e+07	2.85971e+07	6.10113e+07	5.30435e+07	5.73606e+07	3.84059e+07	3.45119e+07	3.57146e+07	2.95571e+07	3.10724e+07	3.11053e+07	3.09285e+07	3.1326e+07	2.53546e+07	3.08636e+07	2.74915e+07	2.71413e+07	5.87861e+07	5.11875e+07	5.52069e+07	GO:0030145, GO:0019538, GO:0006508, GO:0005737, GO:0070006	atr:18447069||http://www.genome.jp/dbget-bin/www_bget?atr:18447069	Glutathione metabolism
A0A072VBR3	Beta-galactosidase	MTR_3g096900	Beta-galactosidase OS=Medicago truncatula OX=3880 GN=MTR_3g096900 PE=3 SV=1	0	139.716	27	19	88	19	700	78.3	7.37	284.5	0	1	1.17328e+08	8.33822e+07	9.98232e+07	4.10674e+07	4.67102e+07	3.8287e+07	3.51116e+07	3.44957e+07	5.31059e+07	3.5491e+07	5.09567e+07	5.08505e+07	2.81838e+07	2.89504e+07	2.85873e+07	1.29764e+08	9.33409e+07	1.09858e+08	3.98703e+07	4.62451e+07	3.72227e+07	3.68938e+07	3.75963e+07	4.5634e+07	3.55311e+07	4.40946e+07	4.32413e+07	2.81326e+07	2.95333e+07	2.89925e+07	GO:0005975, GO:0004553	atr:18446508||http://www.genome.jp/dbget-bin/www_bget?atr:18446508	---
P93327	Chitinase		Chitinase OS=Medicago truncatula OX=3880 PE=2 SV=1	0	139.575	29	9	130	9	325	34.9	7.03	476.04	0	1	1.91095e+08	1.62644e+08	1.91062e+08	1.09659e+08	1.22601e+08	1.1581e+08	1.00169e+08	9.95541e+07	1.40367e+08	9.57907e+07	1.35624e+08	1.28738e+08	7.21188e+07	7.15045e+07	7.23518e+07	1.90773e+08	1.752e+08	1.99885e+08	1.22698e+08	1.32092e+08	1.28275e+08	1.10597e+08	1.0754e+08	1.50419e+08	1.06397e+08	1.39813e+08	1.39782e+08	6.73535e+07	6.65809e+07	6.88464e+07	GO:0004568, GO:0006032, GO:0016998, GO:0005975, GO:0008061	atr:18424340||http://www.genome.jp/dbget-bin/www_bget?atr:18424340	MAPK signaling pathway - plant
A0A072ULB0	Fructose-bisphosphate aldolase	MTR_4g071880	Fructose-bisphosphate aldolase OS=Medicago truncatula OX=3880 GN=MTR_4g071880 PE=3 SV=1	0	139.556	21	9	240	3	386	41.9	6.92	777.54	0	1	6.9861e+07	1.09472e+08	1.05045e+08	1.70756e+08	1.28631e+08	1.53189e+08	1.33518e+08	1.36855e+08	7.22854e+07	1.18179e+08	9.01243e+07	8.94431e+07	3.16926e+08	3.27096e+08	3.10127e+08	6.29709e+07	1.07672e+08	1.04968e+08	1.56611e+08	1.32247e+08	1.52849e+08	1.29633e+08	1.39202e+08	7.18886e+07	1.32912e+08	8.61976e+07	8.42259e+07	3.01957e+08	3.13113e+08	3.07873e+08	GO:0006096, GO:0003824, GO:0004332	atr:18436715||http://www.genome.jp/dbget-bin/www_bget?atr:18436715	Fructose and mannose metabolism
I3SZG9	Chlorophyll a-b binding protein, chloroplastic	25494983	Chlorophyll a-b binding protein, chloroplastic OS=Medicago truncatula OX=3880 GN=25494983 PE=2 SV=1	0	139.442	30	8	79	8	277	29.7	8.25	276.68	0	1	6.97338e+07	8.57122e+07	8.32172e+07	8.57308e+07	8.11303e+07	8.51407e+07	7.06525e+07	6.79417e+07	1.03885e+08	6.32739e+07	1.11579e+08	8.30055e+07	1.04093e+08	8.63284e+07	1.02022e+08	6.48858e+07	6.72326e+07	6.89738e+07	7.85169e+07	8.09663e+07	8.82143e+07	5.83685e+07	5.73768e+07	7.61329e+07	5.50921e+07	7.71442e+07	7.45077e+07	1.12318e+08	9.92809e+07	1.02536e+08	GO:0016020, GO:0009765	atr:18447397||http://www.genome.jp/dbget-bin/www_bget?atr:18447397	Photosynthesis - antenna proteins
A0A072U5L4	Sucrose synthase	25499615	Sucrose synthase OS=Medicago truncatula OX=3880 GN=25499615 PE=3 SV=1	0	139.35	25	21	142	19	809	92.2	6.1	377.52	3	1	7.50506e+07	8.36086e+07	8.5085e+07	9.34266e+07	8.47074e+07	9.18973e+07	8.37388e+07	8.19508e+07	6.73366e+07	7.72178e+07	7.00224e+07	6.81199e+07	8.699e+07	9.18717e+07	8.75713e+07	7.71669e+07	8.592e+07	8.66502e+07	9.42109e+07	8.78996e+07	9.58198e+07	8.08715e+07	7.965e+07	7.06807e+07	7.72982e+07	7.25991e+07	7.19682e+07	8.14328e+07	8.38304e+07	8.20608e+07	GO:0005985, GO:0016157, GO:0016757	atr:18428723||http://www.genome.jp/dbget-bin/www_bget?atr:18428723	Starch and sucrose metabolism
G7ICD0	Beta-galactosidase	11414214	Beta-galactosidase OS=Medicago truncatula OX=3880 GN=11414214 PE=3 SV=2	0	139.018	18	11	111	8	730	81.7	5.94	347.48	0	1	1.40551e+08	9.63839e+07	1.12155e+08	5.9733e+07	6.91699e+07	6.20668e+07	8.1458e+07	7.65332e+07	1.08762e+08	9.76458e+07	1.28478e+08	1.04136e+08	4.37304e+07	4.49031e+07	4.40114e+07	1.41589e+08	9.3875e+07	1.05894e+08	6.16192e+07	7.02369e+07	6.39936e+07	8.26942e+07	7.56948e+07	1.15169e+08	1.03664e+08	1.4022e+08	1.13066e+08	4.8787e+07	5.01961e+07	4.81823e+07	GO:0004553, GO:0005975	atr:18429340||http://www.genome.jp/dbget-bin/www_bget?atr:18429340	---
G7KBI3	Glucose-6-phosphate isomerase	11426025	Glucose-6-phosphate isomerase OS=Medicago truncatula OX=3880 GN=11426025 PE=3 SV=2	0	139.016	40	22	89	22	617	68.1	5.8	251.28	0	1	2.09062e+07	2.12366e+07	2.07934e+07	2.49163e+07	2.51416e+07	2.5978e+07	2.76409e+07	2.87191e+07	2.09436e+07	2.74694e+07	2.19784e+07	2.21279e+07	4.1938e+07	4.44375e+07	4.17708e+07	2.08171e+07	2.0462e+07	2.00841e+07	2.31992e+07	2.51113e+07	2.52985e+07	2.74357e+07	2.73637e+07	2.01028e+07	2.68072e+07	2.12017e+07	2.1027e+07	4.01273e+07	4.15258e+07	3.89774e+07	GO:0004347, GO:0006094, GO:0006096	atr:18431028||http://www.genome.jp/dbget-bin/www_bget?atr:18431028	Pentose phosphate pathway
G7JCS2	Phosphate-responsive 1 family protein	11409803	Phosphate-responsive 1 family protein OS=Medicago truncatula OX=3880 GN=11409803 PE=2 SV=1	0	138.662	30	10	137	10	300	31.8	8.88	480.67	0	1	2.06607e+08	1.52922e+08	1.81878e+08	9.44988e+07	1.17175e+08	1.0336e+08	9.71676e+07	9.85382e+07	9.56296e+07	9.76001e+07	9.31821e+07	9.45182e+07	7.05868e+07	7.33314e+07	7.02017e+07	2.12387e+08	1.49115e+08	1.78507e+08	9.19776e+07	1.19137e+08	1.07118e+08	1.02433e+08	1.02171e+08	9.96523e+07	9.78184e+07	9.37758e+07	9.18753e+07	6.63981e+07	6.83427e+07	6.83113e+07	---	atr:18443010||http://www.genome.jp/dbget-bin/www_bget?atr:18443010	---
Q84UC1	Glutamine synthetase	GS2	Glutamine synthetase OS=Medicago truncatula OX=3880 GN=GS2 PE=2 SV=1	0	138.484	32	12	109	12	428	47	6.73	340.97	0	1	8.71664e+07	7.84265e+07	7.97333e+07	8.64806e+07	1.08074e+08	1.08948e+08	1.10698e+08	1.13032e+08	7.31096e+07	1.05929e+08	7.55362e+07	7.88142e+07	1.69844e+08	1.69101e+08	1.61651e+08	8.32852e+07	7.45024e+07	7.67357e+07	8.90603e+07	1.13186e+08	1.14505e+08	1.13911e+08	1.19897e+08	7.41978e+07	1.1587e+08	8.05341e+07	8.05292e+07	1.91485e+08	1.88354e+08	1.81004e+08	GO:0006542, GO:0006807, GO:0004356, GO:0003824	atr:18440614||http://www.genome.jp/dbget-bin/www_bget?atr:18440614	Nitrogen metabolism
G7IED1	Putative NAD(P)-binding domain-containing protein	11429745	Putative NAD(P)-binding domain-containing protein OS=Medicago truncatula OX=3880 GN=11429745 PE=4 SV=1	0	138.049	33	11	167	11	401	43.4	7.33	604.91	0	1	8.31552e+07	9.51145e+07	8.75342e+07	1.17663e+08	1.15394e+08	1.2736e+08	1.12806e+08	1.13838e+08	7.19121e+07	1.02837e+08	7.88403e+07	7.95448e+07	1.95263e+08	1.88017e+08	1.89358e+08	7.72077e+07	8.36208e+07	8.08097e+07	1.08391e+08	1.13192e+08	1.22238e+08	1.06343e+08	1.07394e+08	7.28812e+07	9.72312e+07	7.90136e+07	7.98412e+07	1.9652e+08	1.8668e+08	1.85677e+08	GO:0003824	atr:18440901||http://www.genome.jp/dbget-bin/www_bget?atr:18440901	---
A0A072U9J1	Heat shock protein 81-2	25497103	Heat shock protein 81-2 OS=Medicago truncatula OX=3880 GN=25497103 PE=3 SV=1	0	137.875	17	13	132	2	699	80.3	5.06	379.19	1	1	164124	186066	178067	215866	196539	234218	192139	172075	228055	168347	210856	216425	185150	188828	183664	172015	169632	156725	178845	169134	190990	189235	186502	173950	194061	172661	177941	173970	173886	169227	GO:0006457, GO:0016887, GO:0051082, GO:0005524	atr:18424137||http://www.genome.jp/dbget-bin/www_bget?atr:18424137	Protein processing in endoplasmic reticulum
A0A072VNM9	GDP-D-mannose-3,5-epimerase	25484645	GDP-D-mannose-3,5-epimerase OS=Medicago truncatula OX=3880 GN=25484645 PE=4 SV=1	0	137.846	45	18	98	12	416	47.1	6.47	325.98	8	1	4.43613e+07	4.39405e+07	4.49884e+07	4.60849e+07	5.25108e+07	5.37444e+07	4.08526e+07	4.2642e+07	4.3313e+07	3.89611e+07	4.38961e+07	4.41865e+07	6.46984e+07	6.55912e+07	6.33056e+07	4.4533e+07	4.77615e+07	4.64584e+07	4.81339e+07	5.07569e+07	5.20035e+07	4.24514e+07	4.46968e+07	4.69591e+07	4.26363e+07	4.77228e+07	4.75429e+07	6.9651e+07	6.72569e+07	6.80207e+07	GO:0051287, GO:0003824, GO:0047918	atr:18429544||http://www.genome.jp/dbget-bin/www_bget?atr:18429544	Ascorbate and aldarate metabolism
A0A072UID0	5-methyltetrahydropteroyltriglutamate--homocysteine S-methyltransferase	25495847	5-methyltetrahydropteroyltriglutamate--homocysteine S-methyltransferase OS=Medicago truncatula OX=3880 GN=25495847 PE=3 SV=1	0	137.55	26	19	105	8	765	84.4	6.7	297.98	6	1	2.14651e+07	2.20707e+07	2.28678e+07	2.32308e+07	2.34895e+07	2.43179e+07	2.15598e+07	2.23943e+07	2.0895e+07	2.04514e+07	2.03546e+07	2.09389e+07	1.96025e+07	2.01441e+07	1.94989e+07	2.25183e+07	2.25183e+07	2.35977e+07	2.30361e+07	2.30977e+07	2.37696e+07	2.19294e+07	2.18832e+07	2.22647e+07	2.10549e+07	2.12669e+07	2.16535e+07	2.00498e+07	2.04878e+07	2.0051e+07	GO:0003871, GO:0008270, GO:0008652, GO:0009086	atr:18421537||http://www.genome.jp/dbget-bin/www_bget?atr:18421537	Selenocompound metabolism
G7KEK9	Glucose-1-phosphate adenylyltransferase	11418715	Glucose-1-phosphate adenylyltransferase OS=Medicago truncatula OX=3880 GN=11418715 PE=3 SV=1	0	137.485	33	16	139	9	515	56.4	7.12	401.67	9	1	4.34945e+07	4.5457e+07	4.20349e+07	5.07422e+07	5.077e+07	5.4346e+07	5.0651e+07	5.15855e+07	4.3841e+07	5.00868e+07	4.7317e+07	4.94264e+07	1.20034e+08	1.23133e+08	1.15203e+08	4.15037e+07	4.44486e+07	4.13398e+07	5.02519e+07	5.14005e+07	5.30253e+07	5.40068e+07	5.16429e+07	4.24316e+07	5.32009e+07	4.75306e+07	4.87738e+07	1.17285e+08	1.16973e+08	1.12891e+08	GO:0009058, GO:0016779, GO:0005978, GO:0008878	atr:18447461||http://www.genome.jp/dbget-bin/www_bget?atr:18447461	Starch and sucrose metabolism
A0A072VF11	40S ribosomal protein S2-4	25482548	40S ribosomal protein S2-4 OS=Medicago truncatula OX=3880 GN=25482548 PE=3 SV=1	0	137.281	44	13	103	1	277	30.4	10.32	343.14	17	1	1.96029e+08	1.565e+08	1.65301e+08	1.56032e+08	1.89289e+08	1.84263e+08	1.97277e+08	1.99996e+08	1.39888e+08	1.93564e+08	1.36466e+08	1.38857e+08	1.98191e+08	2.11587e+08	1.99331e+08	2.0862e+08	1.58019e+08	1.71095e+08	1.596e+08	2.05012e+08	1.96839e+08	2.05493e+08	2.12232e+08	1.4048e+08	2.02853e+08	1.35675e+08	1.37714e+08	1.97084e+08	1.92631e+08	1.92926e+08	GO:0003735, GO:0015935, GO:0005840, GO:0006412, GO:0003723	atr:18429225||http://www.genome.jp/dbget-bin/www_bget?atr:18429225	Ribosome
G7JAP0	Putative sedoheptulose-bisphosphatase	11408199	Putative sedoheptulose-bisphosphatase OS=Medicago truncatula OX=3880 GN=11408199 PE=3 SV=1	0	136.938	37	16	231	16	387	41.9	6.87	638.83	0	1	1.1575e+08	1.37571e+08	1.26545e+08	1.72998e+08	1.6116e+08	1.74158e+08	1.77642e+08	1.86651e+08	1.34716e+08	1.71774e+08	1.52692e+08	1.57226e+08	5.36303e+08	4.94217e+08	5.05062e+08	1.22595e+08	1.44728e+08	1.37011e+08	1.87403e+08	1.73016e+08	1.88493e+08	1.87703e+08	1.97456e+08	1.54877e+08	1.89841e+08	1.69112e+08	1.73589e+08	5.32579e+08	4.87697e+08	4.99597e+08	GO:0016791, GO:0042578, GO:0005975	atr:18422128||http://www.genome.jp/dbget-bin/www_bget?atr:18422128	Carbon metabolism
G7IPY3	40S ribosomal protein S14	11440830	40S ribosomal protein S14 OS=Medicago truncatula OX=3880 GN=11440830 PE=2 SV=2	0	136.819	55	10	112	1	151	16.3	10.59	369.69	0	1	2.9268e+06	3.83312e+06	3.64868e+06	4.49041e+06	3.71624e+06	4.21698e+06	3.0016e+06	3.27273e+06	3.026e+06	2.86678e+06	3.21385e+06	3.08054e+06	2.85034e+06	3.00663e+06	2.90203e+06	2.65619e+06	3.48081e+06	3.21919e+06	3.97677e+06	3.07596e+06	3.6697e+06	3.02988e+06	2.99177e+06	2.60548e+06	2.75814e+06	2.86175e+06	2.75104e+06	4.20163e+06	4.26352e+06	4.14612e+06	GO:0006412, GO:0003735, GO:0005840	atr:105421196||http://www.genome.jp/dbget-bin/www_bget?atr:105421196	Ribosome
G7JTZ0	Malate dehydrogenase	11405683	Malate dehydrogenase OS=Medicago truncatula OX=3880 GN=11405683 PE=3 SV=1	0	136.739	38	12	101	11	356	37.3	7.43	361.9	3	1	3.29384e+07	3.23338e+07	3.19772e+07	3.44263e+07	3.6308e+07	3.65414e+07	3.95013e+07	4.04371e+07	3.09416e+07	3.82218e+07	3.41469e+07	3.47238e+07	8.40941e+07	7.22157e+07	7.62776e+07	2.92561e+07	3.06432e+07	2.95552e+07	3.35758e+07	3.5954e+07	3.71439e+07	3.6797e+07	3.68742e+07	3.22898e+07	3.54991e+07	3.42966e+07	3.53785e+07	8.97686e+07	8.70728e+07	8.73226e+07	GO:0030060, GO:0003824, GO:0016616, GO:0006099, GO:0005975, GO:0016491, GO:0019752	atr:18442455||http://www.genome.jp/dbget-bin/www_bget?atr:18442455	Citrate cycle (TCA cycle)
I3SDM9	Bet_v_1 domain-containing protein		Bet_v_1 domain-containing protein OS=Medicago truncatula OX=3880 PE=2 SV=1	0	136.541	39	8	136	1	157	16.6	5	441.81	0	1	1.2676e+07	5.16883e+06	7.17359e+06	3.29899e+06	5.29044e+06	4.56468e+06	5.2164e+06	5.54695e+06	1.94424e+06	4.52147e+06	1.91524e+06	2.01974e+06	2.30976e+06	2.60825e+06	2.2527e+06	6.78593e+06	4.74625e+06	5.5226e+06	4.53099e+06	4.94289e+06	4.99173e+06	4.08944e+06	4.16793e+06	4.99849e+06	3.84946e+06	4.43445e+06	4.75786e+06	4.96897e+06	5.00834e+06	4.60386e+06	GO:0009738, GO:0038023, GO:0004864, GO:0010427, GO:0006952	atr:18431342||http://www.genome.jp/dbget-bin/www_bget?atr:18431342	---
A0A396HZZ8	Tubulin beta chain	MtrunA17_Chr4g0007371	Tubulin beta chain OS=Medicago truncatula OX=3880 GN=MtrunA17_Chr4g0007371 PE=3 SV=1	0	136.476	41	17	94	5	451	50.7	4.83	268.75	3	1	6.93004e+06	7.15106e+06	7.29759e+06	6.97627e+06	6.61979e+06	6.70349e+06	7.06762e+06	7.2963e+06	6.23456e+06	7.22909e+06	6.3738e+06	6.52655e+06	5.58566e+06	5.92017e+06	5.79644e+06	8.17883e+06	7.55721e+06	7.92686e+06	6.73691e+06	6.82388e+06	6.84621e+06	7.48004e+06	7.56059e+06	6.46142e+06	7.25463e+06	6.39082e+06	6.32071e+06	5.50251e+06	5.76144e+06	5.71228e+06	GO:0005874, GO:0003924, GO:0005200, GO:0005525, GO:0007017	atr:18422898||http://www.genome.jp/dbget-bin/www_bget?atr:18422898	Phagosome
A0A072V3A8	Catalase	25490307	Catalase OS=Medicago truncatula OX=3880 GN=25490307 PE=3 SV=1	0	136.3	29	13	180	13	492	56.7	7.3	514.76	0	1	7.50908e+07	8.08883e+07	7.81241e+07	7.43198e+07	7.85465e+07	7.55225e+07	8.0125e+07	8.0856e+07	7.39787e+07	8.04942e+07	7.93883e+07	8.27135e+07	1.41854e+08	1.39614e+08	1.40995e+08	7.4434e+07	6.69838e+07	6.79055e+07	7.17954e+07	8.90445e+07	8.66435e+07	9.39424e+07	9.50674e+07	6.84281e+07	9.75661e+07	7.00561e+07	7.2357e+07	1.15751e+08	1.11161e+08	1.12337e+08	GO:0006979, GO:0004096, GO:0020037	atr:18424073||http://www.genome.jp/dbget-bin/www_bget?atr:18424073	MAPK signaling pathway - plant
G7II48	Heat shock 70 kDa protein	11433061	Heat shock 70 kDa protein OS=Medicago truncatula OX=3880 GN=11433061 PE=4 SV=1	0	136.192	22	17	69	9	858	95.2	5.24	209.08	0	1	3.20158e+06	2.97216e+06	2.95701e+06	2.87299e+06	2.76084e+06	2.88778e+06	3.16605e+06	2.95191e+06	3.20593e+06	2.94184e+06	3.24225e+06	3.16163e+06	3.47736e+06	3.77674e+06	3.38123e+06	3.74253e+06	2.80995e+06	3.05336e+06	2.82951e+06	3.11773e+06	3.17299e+06	3.37273e+06	3.45418e+06	2.63077e+06	3.18773e+06	2.73254e+06	2.72458e+06	3.68223e+06	3.76494e+06	3.61735e+06	GO:0016887, GO:0005524	atr:18432069||http://www.genome.jp/dbget-bin/www_bget?atr:18432069	---
G7LIV6	Biotin carboxylase	11442175	Biotin carboxylase OS=Medicago truncatula OX=3880 GN=11442175 PE=2 SV=2	0	136.048	39	16	82	16	542	59.4	7.66	262.37	0	1	4.192e+07	4.2282e+07	4.39062e+07	3.90791e+07	3.69987e+07	3.89275e+07	4.258e+07	4.30249e+07	3.82758e+07	4.13656e+07	3.66942e+07	3.82913e+07	3.9412e+07	4.0286e+07	3.89654e+07	3.96184e+07	4.06287e+07	4.41078e+07	3.67944e+07	3.50519e+07	3.65417e+07	3.79974e+07	3.61101e+07	3.79162e+07	3.80569e+07	3.69212e+07	3.78923e+07	3.81166e+07	3.92692e+07	3.82324e+07	GO:0016874, GO:0005524, GO:0046872	atr:18427080||http://www.genome.jp/dbget-bin/www_bget?atr:18427080	Propanoate metabolism
A0A396J5E1	Putative ATPase, AAA-type, core, peptidase, FtsH	MtrunA17_Chr2g0297281	Putative ATPase, AAA-type, core, peptidase, FtsH OS=Medicago truncatula OX=3880 GN=MtrunA17_Chr2g0297281 PE=3 SV=1	0	135.745	27	17	106	8	750	80.8	7.17	294.84	0	1	1.04023e+07	1.07991e+07	1.06708e+07	1.19273e+07	1.15376e+07	1.18986e+07	1.20509e+07	1.21495e+07	1.17491e+07	1.17804e+07	1.19216e+07	1.20209e+07	1.70786e+07	1.7664e+07	1.69804e+07	9.91953e+06	1.23926e+07	1.11306e+07	1.29865e+07	1.22342e+07	1.25673e+07	1.25351e+07	1.26396e+07	1.32842e+07	1.26627e+07	1.37757e+07	1.36069e+07	1.67872e+07	1.7229e+07	1.70037e+07	GO:0016887, GO:0004176, GO:0016020, GO:0005524, GO:0006508, GO:0004222	atr:18428801||http://www.genome.jp/dbget-bin/www_bget?atr:18428801	---
A0A072TJV0	Photosystem I P700 chlorophyll a apoprotein A1	MTR_0002s0580	Photosystem I P700 chlorophyll a apoprotein A1 OS=Medicago truncatula OX=3880 GN=MTR_0002s0580 PE=3 SV=1	0	135.687	10	13	353	1	1438	160.2	7.23	933.85	0	1	7.58795e+06	7.96227e+06	7.76503e+06	7.4812e+06	8.84847e+06	8.40851e+06	7.09693e+06	6.80194e+06	9.55816e+06	7.57427e+06	8.99475e+06	9.10998e+06	7.42971e+06	7.88029e+06	7.40911e+06	5.65815e+06	5.79018e+06	5.90087e+06	7.15509e+06	9.94906e+06	9.6937e+06	6.36864e+06	5.99988e+06	9.36061e+06	5.99054e+06	7.4085e+06	7.89536e+06	5.92585e+06	6.32419e+06	5.91468e+06	GO:0016021, GO:0046872, GO:0009579, GO:0015979, GO:0009522	atr:2546488|psaA, AmtrCp022|http://www.genome.jp/dbget-bin/www_bget?atr:2546488	Photosynthesis
A0A072TSD1	Pectin acetylesterase	11425257	Pectin acetylesterase OS=Medicago truncatula OX=3880 GN=11425257 PE=3 SV=1	0	135.597	45	13	84	13	393	43.2	8.47	276.34	0	1	1.10242e+08	9.82034e+07	1.02149e+08	7.62965e+07	7.89234e+07	7.66439e+07	8.12972e+07	8.27738e+07	1.08603e+08	8.16016e+07	1.08987e+08	1.06702e+08	7.83325e+07	8.13482e+07	7.72114e+07	1.1053e+08	9.63169e+07	1.01761e+08	7.60915e+07	8.15661e+07	7.9333e+07	8.4457e+07	8.22885e+07	1.1103e+08	7.94293e+07	1.08094e+08	1.05e+08	7.28987e+07	7.50008e+07	7.23972e+07	GO:0016787	atr:18422696||http://www.genome.jp/dbget-bin/www_bget?atr:18422696	---
A0A072UW36	Adenosine kinase	25494427	Adenosine kinase OS=Medicago truncatula OX=3880 GN=25494427 PE=3 SV=1	0	135.559	33	9	55	1	341	37.5	5.25	203.92	0	1	4.13186e+06	3.32627e+06	3.61137e+06	3.75994e+06	4.80923e+06	4.69169e+06	3.5158e+06	3.2426e+06	4.42842e+06	3.2068e+06	4.16471e+06	4.4354e+06	4.03744e+06	4.06098e+06	3.92995e+06	4.55655e+06	4.0181e+06	4.23533e+06	4.52384e+06	4.79305e+06	5.129e+06	3.92949e+06	3.75201e+06	4.22761e+06	3.75224e+06	4.04087e+06	3.94439e+06	4.01257e+06	4.01772e+06	4.10029e+06	GO:0004001, GO:0006166, GO:0016773	atr:18995830||http://www.genome.jp/dbget-bin/www_bget?atr:18995830	Purine metabolism
G7J421	Tubulin alpha chain	11432745	Tubulin alpha chain OS=Medicago truncatula OX=3880 GN=11432745 PE=3 SV=1	0	135.362	47	17	133	1	451	49.5	5.06	340.9	7	1	4.80012e+07	5.14615e+07	5.55931e+07	4.1119e+07	3.90587e+07	4.01805e+07	3.6494e+07	3.85906e+07	2.9979e+07	3.64469e+07	3.05787e+07	3.02182e+07	3.09539e+07	3.29236e+07	3.10629e+07	4.58106e+07	4.472e+07	4.80474e+07	3.75267e+07	3.61336e+07	3.63284e+07	3.75297e+07	3.92466e+07	2.93327e+07	3.63066e+07	2.98712e+07	3.07511e+07	3.99882e+07	4.17502e+07	4.01999e+07	GO:0005874, GO:0003924, GO:0005200, GO:0005525, GO:0007017	atr:18442468||http://www.genome.jp/dbget-bin/www_bget?atr:18442468	Phagosome
W8CYA2	Photosystem II D2 protein	psbD	Photosystem II D2 protein OS=Medicago truncatula f. tricycla OX=304102 GN=psbD PE=3 SV=1	0	134.838	24	6	188	2	353	39.5	5.55	671.11	0	1	9.24974e+06	7.6472e+06	7.9544e+06	1.01441e+07	1.29912e+07	1.40503e+07	1.12034e+07	1.10273e+07	9.87601e+06	1.04304e+07	9.41944e+06	1.00092e+07	1.24966e+07	1.31704e+07	1.24355e+07	9.49849e+06	1.07423e+07	1.07661e+07	1.33722e+07	1.38081e+07	1.47929e+07	1.0627e+07	1.1441e+07	1.41777e+07	1.02538e+07	1.37787e+07	1.4155e+07	1.32693e+07	1.40316e+07	1.34116e+07	GO:0045156, GO:0015979, GO:0009523, GO:0016020, GO:0009772, GO:0019684	atr:2546568|psbD, AmtrCp017|http://www.genome.jp/dbget-bin/www_bget?atr:2546568	Photosynthesis
G7KA59	Glycoside hydrolase family 3 amino-terminal domain protein	11432485	Glycoside hydrolase family 3 amino-terminal domain protein OS=Medicago truncatula OX=3880 GN=11432485 PE=3 SV=1	0	134.596	27	20	115	2	780	85.8	9.04	356.42	2	1	1.17358e+07	1.23342e+07	1.3461e+07	5.71032e+06	5.68645e+06	4.87981e+06	5.64903e+06	5.16626e+06	6.87851e+06	5.6253e+06	6.70627e+06	6.55103e+06	4.65867e+06	4.81787e+06	4.67127e+06	1.18763e+07	1.3926e+07	1.48647e+07	5.85342e+06	5.95087e+06	5.07179e+06	5.62255e+06	5.51597e+06	7.46399e+06	5.56644e+06	7.62256e+06	7.35178e+06	5.07581e+06	5.1143e+06	5.2297e+06	GO:0009044, GO:0045493, GO:0004553, GO:0005975	atr:18421965||http://www.genome.jp/dbget-bin/www_bget?atr:18421965	---
I3T7C9	SERPIN domain-containing protein		SERPIN domain-containing protein OS=Medicago truncatula OX=3880 PE=2 SV=1	0	134.59	28	9	80	9	389	42.7	5.87	259.83	0	1	1.12874e+08	8.46139e+07	1.02535e+08	5.95886e+07	7.14075e+07	6.87938e+07	5.323e+07	5.2268e+07	5.84828e+07	5.11097e+07	5.59568e+07	5.64925e+07	3.96173e+07	4.07673e+07	3.96884e+07	1.05924e+08	8.54607e+07	9.81491e+07	6.42351e+07	7.50322e+07	7.19369e+07	4.95736e+07	5.07256e+07	5.9305e+07	4.61659e+07	5.67932e+07	5.81443e+07	5.3924e+07	5.29979e+07	5.37737e+07	GO:0004867, GO:0005615	atr:18438277||http://www.genome.jp/dbget-bin/www_bget?atr:18438277	---
B7FHB2	Ribulose bisphosphate carboxylase small subunit	11416005	Ribulose bisphosphate carboxylase small subunit OS=Medicago truncatula OX=3880 GN=11416005 PE=2 SV=1	0	134.588	41	8	458	4	180	20	8.54	1257.56	1	1	6.24542e+07	7.11183e+07	6.73686e+07	1.01736e+08	1.10097e+08	1.18373e+08	1.15347e+08	1.19819e+08	6.03849e+07	1.04898e+08	6.60196e+07	6.827e+07	3.30763e+08	5.689e+07	2.1536e+08	6.20367e+07	6.77817e+07	6.50788e+07	1.01834e+08	1.07402e+08	1.18331e+08	1.07321e+08	1.10837e+08	5.67741e+07	9.51725e+07	6.61479e+07	6.90695e+07	3.0848e+08	1.28786e+08	2.25666e+08	---	atr:18432099||http://www.genome.jp/dbget-bin/www_bget?atr:18432099	Glyoxylate and dicarboxylate metabolism
A0A072TS46	Putative 2-alkenal reductase (NAD(P)(+))	25501340	Putative 2-alkenal reductase (NAD(P)(+)) OS=Medicago truncatula OX=3880 GN=25501340 PE=3 SV=1	0	134.164	46	16	79	13	384	40.9	7.88	260.25	3	1	3.24153e+07	3.18476e+07	3.23397e+07	3.07626e+07	3.30757e+07	3.31672e+07	3.22611e+07	3.28166e+07	3.19758e+07	3.07413e+07	3.36265e+07	3.44538e+07	7.62934e+07	6.31326e+07	6.83492e+07	3.23994e+07	3.25567e+07	3.29467e+07	3.08884e+07	3.3163e+07	3.256e+07	3.17495e+07	3.16386e+07	3.34704e+07	3.20256e+07	3.41337e+07	3.59528e+07	6.67309e+07	5.74764e+07	6.36069e+07	GO:0008270, GO:0016628, GO:0016491	atr:18434846||http://www.genome.jp/dbget-bin/www_bget?atr:18434846	---
W8CYA5	Photosystem II protein D1	psbA	Photosystem II protein D1 OS=Medicago truncatula f. tricycla OX=304102 GN=psbA PE=3 SV=1	0	134.096	23	8	413	3	353	38.9	5.25	1144.23	13	1	1.52396e+08	1.74285e+08	1.76771e+08	1.99242e+08	1.71616e+08	1.86991e+08	1.64742e+08	1.71325e+08	2.38371e+08	1.66459e+08	2.25931e+08	2.23497e+08	1.28972e+08	1.28352e+08	1.29446e+08	1.4403e+08	1.67718e+08	1.66709e+08	1.93573e+08	1.70277e+08	1.89501e+08	1.55409e+08	1.59108e+08	2.6745e+08	1.56503e+08	2.53075e+08	2.35259e+08	1.21024e+08	1.22508e+08	1.21546e+08	GO:0019684, GO:0009055, GO:0009772, GO:0045156	atr:2546591|psbA, AmtrCp001|http://www.genome.jp/dbget-bin/www_bget?atr:2546591	Photosynthesis
A0A396K0N0	Putative Heat shock protein Hsp90 family	MtrunA17_Chr1g0202601	Putative Heat shock protein Hsp90 family OS=Medicago truncatula OX=3880 GN=MtrunA17_Chr1g0202601 PE=3 SV=1	0	133.807	16	12	156	1	682	78.6	5.14	481.87	0	1	345000	205976	204602	263504	367325	347383	452765	427713	251625	342203	241836	255176	156862	132333	131415	410916	291816	292655	231660	289638	268302	348206	374076	210834	355722	208112	203094	187086	195810	198708	GO:0051082, GO:0005524, GO:0016887, GO:0006457	atr:18424137||http://www.genome.jp/dbget-bin/www_bget?atr:18424137	Protein processing in endoplasmic reticulum
B7FGP1	Putative ribosomal protein S11	11442711	Putative ribosomal protein S11 OS=Medicago truncatula OX=3880 GN=11442711 PE=2 SV=1	0	133.427	55	10	95	1	151	16.3	10.59	330.67	13	1	2.46333e+07	2.56134e+07	2.51564e+07	2.78823e+07	2.46355e+07	2.58613e+07	2.32707e+07	2.37113e+07	1.77353e+07	2.31941e+07	1.97476e+07	1.92524e+07	3.48996e+07	3.63923e+07	3.51805e+07	2.17249e+07	2.35631e+07	2.3952e+07	2.62406e+07	2.45892e+07	2.7113e+07	2.2693e+07	2.29024e+07	1.56611e+07	2.29318e+07	1.73007e+07	1.69499e+07	3.35515e+07	3.08136e+07	3.20889e+07	GO:0005840, GO:0003735, GO:0006412	atr:105421196||http://www.genome.jp/dbget-bin/www_bget?atr:105421196	Ribosome
A0A072UVX2	ADP/ATP translocase	25488760	ADP/ATP translocase OS=Medicago truncatula OX=3880 GN=25488760 PE=3 SV=1	0	133.37	30	12	146	5	389	42.3	9.79	399.33	0	1	3.14224e+07	3.21352e+07	3.33851e+07	3.40691e+07	3.59212e+07	3.78111e+07	3.38773e+07	3.466e+07	3.49349e+07	3.37651e+07	3.32104e+07	3.46941e+07	3.70967e+07	3.40825e+07	3.54997e+07	3.23163e+07	3.4554e+07	3.62703e+07	3.66558e+07	3.66647e+07	4.03575e+07	3.52335e+07	3.48604e+07	3.94667e+07	3.20678e+07	3.7274e+07	3.70666e+07	3.95401e+07	3.70406e+07	3.86894e+07	GO:0005743, GO:0140021, GO:0005471, GO:0055085, GO:1990544	atr:18445032||http://www.genome.jp/dbget-bin/www_bget?atr:18445032	---
A0A072TXF8	Polygalacturonase inhibitor	25497917	Polygalacturonase inhibitor OS=Medicago truncatula OX=3880 GN=25497917 PE=4 SV=1	0	133.083	25	6	93	3	344	37.9	8.57	343.28	0	1	7.59225e+07	7.0591e+07	8.02781e+07	6.87115e+07	8.98401e+07	9.39423e+07	6.1185e+07	6.18042e+07	1.06222e+08	6.16823e+07	9.69324e+07	9.2933e+07	1.98561e+07	2.08026e+07	2.10747e+07	9.64342e+07	9.19131e+07	1.04964e+08	6.11087e+07	7.42606e+07	6.84206e+07	6.11001e+07	6.41752e+07	1.30934e+08	5.8328e+07	1.2352e+08	1.19365e+08	3.34187e+07	3.37896e+07	3.1347e+07	GO:0005515	atr:18439873||http://www.genome.jp/dbget-bin/www_bget?atr:18439873	---
G7LI94	DEAD-box ATP-dependent RNA helicase	11418913	DEAD-box ATP-dependent RNA helicase OS=Medicago truncatula OX=3880 GN=11418913 PE=3 SV=1	0	132.982	37	16	165	2	413	46.6	5.67	401.08	0	1	6.22709e+06	4.92278e+06	5.49008e+06	4.93771e+06	5.81924e+06	5.66951e+06	5.58349e+06	5.87493e+06	3.86136e+06	5.84022e+06	3.72925e+06	3.73041e+06	4.2972e+06	4.44315e+06	4.23183e+06	6.90113e+06	5.41165e+06	5.83466e+06	5.39699e+06	6.87e+06	7.0332e+06	7.35693e+06	7.19044e+06	4.7664e+06	6.96009e+06	4.42171e+06	4.41614e+06	4.08531e+06	4.13702e+06	3.97479e+06	GO:0003724, GO:0005524, GO:0003676	atr:18443664||http://www.genome.jp/dbget-bin/www_bget?atr:18443664	RNA transport
G7JU14	Heat shock 70 kDa protein	11406812	Heat shock 70 kDa protein OS=Medicago truncatula OX=3880 GN=11406812 PE=3 SV=1	0	132.819	29	20	94	12	675	72.3	6.07	271	7	1	3.87645e+07	4.03127e+07	4.02704e+07	4.28183e+07	3.98726e+07	4.12561e+07	3.7898e+07	3.85491e+07	3.87796e+07	3.68768e+07	4.14197e+07	4.17233e+07	7.53731e+07	7.72669e+07	7.5277e+07	3.59369e+07	3.6441e+07	3.5015e+07	4.27136e+07	3.96302e+07	4.17033e+07	3.94992e+07	3.72162e+07	3.70897e+07	3.85962e+07	3.92517e+07	3.94459e+07	7.1633e+07	7.03679e+07	7.1235e+07	GO:0051082, GO:0005524, GO:0016887, GO:0006457	atr:18446448||http://www.genome.jp/dbget-bin/www_bget?atr:18446448	RNA degradation
A0A072UQA9	Beta-xylosidase/alpha-L-arabinofuranosidase-like protein	25493289	Beta-xylosidase/alpha-L-arabinofuranosidase-like protein OS=Medicago truncatula OX=3880 GN=25493289 PE=3 SV=1	0	132.133	22	17	125	13	774	83.5	8.27	375.45	4	1	1.45167e+08	1.50814e+08	1.69759e+08	6.65384e+07	6.38704e+07	5.48986e+07	5.21713e+07	5.35153e+07	7.07367e+07	5.29742e+07	7.26089e+07	6.76631e+07	5.07501e+07	5.07279e+07	5.21279e+07	1.37596e+08	1.57371e+08	1.76274e+08	6.61179e+07	6.43899e+07	5.3457e+07	4.88461e+07	4.92987e+07	7.8755e+07	4.95523e+07	7.74406e+07	7.63192e+07	4.14684e+07	4.26569e+07	4.34646e+07	GO:0005975, GO:0045493, GO:0009044, GO:0004553	atr:18422386||http://www.genome.jp/dbget-bin/www_bget?atr:18422386	Amino sugar and nucleotide sugar metabolism
G7IE32	Thioredoxin-dependent peroxiredoxin	11420246	Thioredoxin-dependent peroxiredoxin OS=Medicago truncatula OX=3880 GN=11420246 PE=2 SV=2	0	131.811	30	8	115	2	267	29.2	6.4	414.67	0	1	1.45035e+08	1.40371e+08	1.67804e+08	9.08817e+07	9.91016e+07	9.87801e+07	7.70717e+07	8.32484e+07	4.26759e+07	6.8451e+07	4.4982e+07	4.3627e+07	3.9205e+07	4.18471e+07	4.15093e+07	1.55623e+08	1.48122e+08	1.80278e+08	9.73772e+07	1.04773e+08	1.02967e+08	8.12617e+07	8.32809e+07	4.01124e+07	7.29556e+07	4.53508e+07	4.09352e+07	3.83414e+07	4.09242e+07	4.2452e+07	GO:0016491, GO:0016209, GO:0051920	atr:18444464||http://www.genome.jp/dbget-bin/www_bget?atr:18444464	---
I3S8E8	D-fructose-1,6-bisphosphate 1-phosphohydrolase		D-fructose-1,6-bisphosphate 1-phosphohydrolase OS=Medicago truncatula OX=3880 PE=2 SV=1	0	131.607	44	15	98	15	339	37	5.88	291.67	0	1	4.62896e+07	4.315e+07	4.46387e+07	3.68477e+07	3.98395e+07	3.92311e+07	4.03168e+07	4.13036e+07	3.47199e+07	4.1105e+07	3.72306e+07	3.8717e+07	1.08426e+08	7.69694e+07	9.38476e+07	4.67474e+07	4.47731e+07	4.5687e+07	3.76376e+07	3.97954e+07	3.98711e+07	3.85401e+07	3.86469e+07	3.51758e+07	3.90878e+07	3.77236e+07	3.96742e+07	1.11162e+08	8.42538e+07	9.94438e+07	GO:0042132, GO:0016791, GO:0042578, GO:0005975	atr:18444303||http://www.genome.jp/dbget-bin/www_bget?atr:18444303	Fructose and mannose metabolism
G7J834	Glucose-1-phosphate adenylyltransferase	11436552	Glucose-1-phosphate adenylyltransferase OS=Medicago truncatula OX=3880 GN=11436552 PE=3 SV=1	0	131.538	32	15	111	8	514	56.2	6.57	305.24	0	1	1.03402e+07	1.10479e+07	1.02008e+07	1.26671e+07	1.15737e+07	1.15539e+07	1.36884e+07	1.26603e+07	1.90301e+07	1.34818e+07	2.13292e+07	1.32889e+07	2.19263e+07	2.00346e+07	2.22922e+07	1.39133e+07	1.42788e+07	1.43742e+07	1.32454e+07	1.1389e+07	1.17048e+07	1.23421e+07	1.14426e+07	1.88406e+07	1.15013e+07	2.00681e+07	1.43673e+07	1.89287e+07	1.74135e+07	1.89762e+07	GO:0016779, GO:0009058, GO:0008878, GO:0005978	atr:18447461||http://www.genome.jp/dbget-bin/www_bget?atr:18447461	Starch and sucrose metabolism
A0A072VP26	Aspartate aminotransferase	25481947	Aspartate aminotransferase OS=Medicago truncatula OX=3880 GN=25481947 PE=3 SV=1	0	131.511	42	16	79	15	465	50.9	8.16	228.78	1	1	2.86403e+07	3.29647e+07	3.14441e+07	3.39735e+07	3.07744e+07	3.18128e+07	3.46585e+07	3.39563e+07	3.20811e+07	3.53267e+07	3.35686e+07	3.32483e+07	5.02329e+07	4.41806e+07	4.68176e+07	3.18111e+07	3.20593e+07	3.07038e+07	3.50297e+07	3.62787e+07	3.73345e+07	3.93822e+07	3.87883e+07	3.15575e+07	4.01898e+07	3.34103e+07	2.9593e+07	3.70527e+07	3.46032e+07	3.61507e+07	GO:0003824, GO:0030170, GO:0009058, GO:0008483, GO:0006520	atr:18438519||http://www.genome.jp/dbget-bin/www_bget?atr:18438519	Phenylalanine, tyrosine and tryptophan biosynthesis
A0A072VID5	GTP-binding protein TypA/BipA	25483409	GTP-binding protein TypA/BipA OS=Medicago truncatula OX=3880 GN=25483409 PE=4 SV=1	0	131.444	24	15	98	15	674	74.8	7.15	309.83	0	1	2.84224e+07	3.05498e+07	2.90719e+07	3.65667e+07	3.55674e+07	3.62086e+07	3.37316e+07	3.47324e+07	3.14239e+07	3.27839e+07	3.17394e+07	3.15478e+07	3.1371e+07	3.27351e+07	3.17983e+07	2.99786e+07	3.24294e+07	3.30721e+07	3.43987e+07	3.47292e+07	3.73527e+07	3.33565e+07	3.44845e+07	3.84145e+07	3.48092e+07	3.63177e+07	3.56704e+07	2.58275e+07	2.60762e+07	2.57871e+07	GO:0003924, GO:0005525	atr:18428976||http://www.genome.jp/dbget-bin/www_bget?atr:18428976	---
A0A072UCM6	Glutamate decarboxylase	25496687	Glutamate decarboxylase OS=Medicago truncatula OX=3880 GN=25496687 PE=3 SV=1	0	131.03	30	14	86	11	499	56.1	5.91	269.78	6	1	3.63656e+07	3.67715e+07	3.89372e+07	3.62538e+07	3.46477e+07	3.6036e+07	3.54411e+07	3.53746e+07	3.56407e+07	3.48182e+07	3.63173e+07	3.5252e+07	4.08681e+07	4.29789e+07	4.04807e+07	4.274e+07	3.37136e+07	3.64312e+07	2.9928e+07	3.68108e+07	3.49546e+07	3.7505e+07	3.60436e+07	3.29742e+07	3.56468e+07	3.27371e+07	3.29149e+07	3.81876e+07	3.90299e+07	3.76877e+07	GO:0016830, GO:0019752, GO:0004351, GO:0006536, GO:0030170, GO:0003824	atr:18439292||http://www.genome.jp/dbget-bin/www_bget?atr:18439292	Taurine and hypotaurine metabolism
A2Q2V1	ATP citrate synthase	11413900	ATP citrate synthase OS=Medicago truncatula OX=3880 GN=11413900 PE=4 SV=1	0	130.85	28	14	71	14	608	65.9	7.72	211.58	0	1	3.15597e+07	2.76868e+07	3.0073e+07	2.76749e+07	3.03861e+07	3.03931e+07	2.91419e+07	3.09819e+07	2.53731e+07	2.83574e+07	2.59002e+07	2.54615e+07	3.51009e+07	3.59954e+07	3.48042e+07	2.79047e+07	2.74459e+07	2.7916e+07	2.98743e+07	2.90863e+07	3.0182e+07	2.88425e+07	2.95778e+07	2.64549e+07	2.83125e+07	2.78654e+07	2.69908e+07	4.75739e+07	4.28117e+07	4.42173e+07	GO:0003824, GO:0046912	atr:18431257||http://www.genome.jp/dbget-bin/www_bget?atr:18431257	Citrate cycle (TCA cycle)
G7IV48	26S protease regulatory subunit 6B	11438063	26S protease regulatory subunit 6B OS=Medicago truncatula OX=3880 GN=11438063 PE=3 SV=1	0	130.406	40	14	69	12	415	46.4	5.59	225.83	0	1	3.01967e+07	4.01582e+07	3.78098e+07	4.97949e+07	3.59589e+07	3.89718e+07	3.6214e+07	3.64447e+07	3.68227e+07	3.58862e+07	3.87443e+07	3.79978e+07	3.66668e+07	3.73627e+07	3.7325e+07	3.26675e+07	3.404e+07	3.4046e+07	3.85337e+07	3.5235e+07	3.70722e+07	3.66677e+07	3.76624e+07	3.39479e+07	3.56467e+07	3.33895e+07	3.4463e+07	3.05704e+07	2.98589e+07	3.03976e+07	GO:0016887, GO:0030163, GO:0005524, GO:0036402, GO:0005737	atr:18432416||http://www.genome.jp/dbget-bin/www_bget?atr:18432416	Proteasome
G7L3L0	60S ribosomal L8-like protein	11436934	60S ribosomal L8-like protein OS=Medicago truncatula OX=3880 GN=11436934 PE=2 SV=1	0	130.293	59	15	128	4	259	28	10.64	427.57	12	1	8.02414e+07	7.18302e+07	7.34384e+07	6.14871e+07	6.7721e+07	6.57686e+07	7.51612e+07	7.74104e+07	6.37486e+07	7.4565e+07	6.96787e+07	7.33484e+07	2.03644e+08	2.07897e+08	1.98025e+08	8.57375e+07	7.77276e+07	7.86253e+07	7.06977e+07	7.48945e+07	7.57944e+07	7.65841e+07	7.85979e+07	7.13743e+07	7.75066e+07	7.72066e+07	8.10838e+07	1.98638e+08	2.07298e+08	1.96156e+08	GO:0005840, GO:0003735, GO:0006412, GO:0003723, GO:0015934	atr:18437636||http://www.genome.jp/dbget-bin/www_bget?atr:18437636	Ribosome
G7KG97	Putative pentapeptide	11443119	Putative pentapeptide OS=Medicago truncatula OX=3880 GN=11443119 PE=4 SV=1	0	130.044	52	11	40	11	262	27.9	6.9	128.39	0	1	1.18334e+07	1.21988e+07	1.20394e+07	1.21409e+07	1.24257e+07	1.26372e+07	1.30129e+07	1.25458e+07	1.14176e+07	1.31341e+07	1.20695e+07	1.22386e+07	2.86029e+07	2.03728e+07	2.43569e+07	1.27801e+07	1.25466e+07	1.28746e+07	1.29031e+07	1.35971e+07	1.38865e+07	1.39149e+07	1.40851e+07	1.24973e+07	1.4392e+07	1.27795e+07	1.30545e+07	2.35984e+07	2.11567e+07	2.46144e+07	---	atr:18422653||http://www.genome.jp/dbget-bin/www_bget?atr:18422653	---
G7IRQ0	Beta-galactosidase	11414756	Beta-galactosidase OS=Medicago truncatula OX=3880 GN=11414756 PE=3 SV=2	0	129.987	15	10	103	1	843	93.2	7.23	360.77	0	1	1.32169e+06	1.37281e+06	1.1997e+06	1.40776e+06	1.22156e+06	1.18583e+06	1.00995e+06	1.13123e+06	1.34099e+06	1.02405e+06	1.45053e+06	1.38184e+06	945025	926921	963649	1.48139e+06	1.52364e+06	1.31193e+06	1.42199e+06	1.23856e+06	1.23333e+06	906528	946453	1.39359e+06	864094	1.49084e+06	1.35247e+06	757281	725566	784895	GO:0005975, GO:0030246, GO:0004553	atr:18444251||http://www.genome.jp/dbget-bin/www_bget?atr:18444251	---
A0A072V210	Glycoside hydrolase family 18 protein	25490142	Glycoside hydrolase family 18 protein OS=Medicago truncatula OX=3880 GN=25490142 PE=4 SV=1	0	129.884	33	11	85	7	364	39.9	8.68	241.57	5	1	1.62663e+08	1.47744e+08	1.6703e+08	5.03883e+07	5.52025e+07	4.00272e+07	3.72785e+07	3.63986e+07	4.85359e+07	3.71916e+07	4.99237e+07	4.86354e+07	4.50548e+07	4.64668e+07	4.5168e+07	1.41848e+08	1.26585e+08	1.4106e+08	5.41514e+07	5.84416e+07	4.61625e+07	4.72618e+07	4.35591e+07	5.78306e+07	4.55184e+07	5.86578e+07	5.82024e+07	5.19532e+07	5.33077e+07	5.27506e+07	GO:0008061, GO:0005975	atr:18436574||http://www.genome.jp/dbget-bin/www_bget?atr:18436574	Amino sugar and nucleotide sugar metabolism
A0A072VQC8	Tubulin alpha chain	25485311	Tubulin alpha chain OS=Medicago truncatula OX=3880 GN=25485311 PE=3 SV=1	0	129.766	47	17	133	1	450	49.4	5.1	336.46	0	1	728297	685396	726093	854705	1.0047e+06	1.04372e+06	1.22113e+06	1.20161e+06	899219	1.04456e+06	863180	865838	628851	644154	635072	718995	713214	703023	882504	1.09332e+06	1.14483e+06	1.32233e+06	1.33986e+06	921625	1.04819e+06	868849	876627	627254	641051	623988	GO:0005874, GO:0003924, GO:0007017, GO:0005200, GO:0005525	atr:18442468||http://www.genome.jp/dbget-bin/www_bget?atr:18442468	Phagosome
G7JNH3	Alanine--tRNA ligase	11441602	Alanine--tRNA ligase OS=Medicago truncatula OX=3880 GN=11441602 PE=3 SV=1	0	129.511	28	25	103	20	950	104.5	6.07	254.14	7	1	5.0749e+07	5.27812e+07	5.39603e+07	6.1754e+07	5.51093e+07	6.07648e+07	6.14105e+07	6.13727e+07	4.70768e+07	5.87051e+07	4.94264e+07	4.80114e+07	8.0849e+07	8.64527e+07	7.94717e+07	5.10186e+07	5.53889e+07	5.42705e+07	6.27154e+07	6.02225e+07	6.34266e+07	6.0279e+07	5.9865e+07	6.27007e+07	6.06019e+07	6.27161e+07	6.07244e+07	7.23246e+07	7.26471e+07	7.11931e+07	GO:0000166, GO:0004812, GO:0006419, GO:0005524, GO:0003676, GO:0004813, GO:0043039, GO:0005737	atr:18421811||http://www.genome.jp/dbget-bin/www_bget?atr:18421811	Aminoacyl-tRNA biosynthesis
G7KTF6	Putative tripeptidyl-peptidase II	11435567	Putative tripeptidyl-peptidase II OS=Medicago truncatula OX=3880 GN=11435567 PE=3 SV=1	0	129.022	14	10	145	3	785	84.4	9.58	506.01	5	1	4.32649e+07	4.94191e+07	4.9352e+07	3.33899e+07	2.56484e+07	2.41053e+07	2.54995e+07	2.58973e+07	2.34025e+07	2.67095e+07	2.61859e+07	2.44909e+07	1.90793e+07	2.04101e+07	2.06518e+07	3.8805e+07	4.75255e+07	4.64757e+07	2.95166e+07	2.62433e+07	2.43162e+07	2.54252e+07	2.55159e+07	2.6475e+07	2.59784e+07	2.94648e+07	2.69785e+07	2.3282e+07	2.45013e+07	2.44991e+07	GO:0006508, GO:0004252, GO:0008236	atr:18447486||http://www.genome.jp/dbget-bin/www_bget?atr:18447486	---
A0A072U566	Peptidylprolyl isomerase	25495180	Peptidylprolyl isomerase OS=Medicago truncatula OX=3880 GN=25495180 PE=4 SV=1	0	128.94	32	11	99	11	455	50	5.31	279.43	0	1	7.61615e+07	6.56107e+07	7.31949e+07	3.7864e+07	3.75212e+07	3.47223e+07	3.63536e+07	3.47314e+07	3.67335e+07	3.51417e+07	3.74026e+07	3.87045e+07	5.91145e+07	5.22138e+07	5.42082e+07	6.96276e+07	6.4952e+07	7.17014e+07	4.25591e+07	4.15446e+07	4.14712e+07	3.54843e+07	3.3842e+07	3.61855e+07	3.59786e+07	3.76574e+07	3.82169e+07	5.82786e+07	5.47639e+07	5.48644e+07	GO:0000413, GO:0003755	atr:18434824||http://www.genome.jp/dbget-bin/www_bget?atr:18434824	---
G7IK85	Mg-protoporphyrin IX chelatase	11439308	Mg-protoporphyrin IX chelatase OS=Medicago truncatula OX=3880 GN=11439308 PE=3 SV=1	0	128.571	47	18	102	18	422	46	5.72	308.22	0	1	4.28741e+07	4.47062e+07	4.21862e+07	5.35741e+07	5.64927e+07	5.8533e+07	5.86345e+07	6.08009e+07	4.7975e+07	5.62294e+07	4.85852e+07	4.94304e+07	6.21913e+07	6.05664e+07	6.05629e+07	4.33101e+07	4.29787e+07	4.28284e+07	5.3205e+07	5.78881e+07	5.97873e+07	6.67787e+07	5.97394e+07	5.01186e+07	6.22884e+07	5.16421e+07	4.98612e+07	5.83258e+07	5.33425e+07	5.73864e+07	GO:0005524, GO:0015995, GO:0016851	atr:18427324||http://www.genome.jp/dbget-bin/www_bget?atr:18427324	Porphyrin and chlorophyll metabolism
A0A072VFN2	Multi-copper oxidase-like protein	25482222	Multi-copper oxidase-like protein OS=Medicago truncatula OX=3880 GN=25482222 PE=3 SV=1	0	128.479	24	11	97	8	543	60.5	8.7	310.96	0	1	8.21734e+07	8.43969e+07	9.71333e+07	4.9207e+07	5.01261e+07	4.66798e+07	4.48334e+07	4.32678e+07	5.67381e+07	4.42607e+07	5.52997e+07	5.52973e+07	4.08686e+07	3.8248e+07	3.9574e+07	7.20437e+07	7.40581e+07	8.25655e+07	5.19977e+07	5.29846e+07	5.17638e+07	4.92564e+07	4.89242e+07	5.71823e+07	4.86855e+07	5.54538e+07	5.51564e+07	4.46681e+07	4.53609e+07	4.40959e+07	GO:0005507, GO:0016491	atr:18445747||http://www.genome.jp/dbget-bin/www_bget?atr:18445747	---
A0A072UWF5	Eukaryotic aspartyl protease family protein	25489024	Eukaryotic aspartyl protease family protein OS=Medicago truncatula OX=3880 GN=25489024 PE=3 SV=1	0	127.814	22	8	194	7	486	52.1	8.44	577.25	1	1	5.6657e+08	4.03428e+08	4.83568e+08	2.09405e+08	2.48818e+08	2.14835e+08	2.14259e+08	2.10943e+08	3.55717e+08	2.169e+08	3.26973e+08	3.28393e+08	1.47959e+08	1.40005e+08	1.51357e+08	5.77419e+08	3.89795e+08	4.77109e+08	2.02739e+08	2.42298e+08	2.20811e+08	2.12176e+08	2.06606e+08	3.7756e+08	2.16038e+08	3.28892e+08	3.26936e+08	1.36676e+08	1.42055e+08	1.38875e+08	GO:0004190, GO:0006508	atr:18447371||http://www.genome.jp/dbget-bin/www_bget?atr:18447371	---
G7K8P7	Peptidylprolyl isomerase	11427367	Peptidylprolyl isomerase OS=Medicago truncatula OX=3880 GN=11427367 PE=3 SV=1	0	127.782	30	16	85	16	561	63.2	5.2	272.74	0	1	2.58378e+07	2.83426e+07	2.78528e+07	3.43181e+07	3.2621e+07	3.5093e+07	3.11576e+07	3.3034e+07	2.8456e+07	3.10526e+07	2.9551e+07	2.9604e+07	4.75222e+07	4.94782e+07	4.74503e+07	2.5272e+07	2.84063e+07	2.82571e+07	3.4042e+07	3.26281e+07	3.53575e+07	3.05389e+07	2.99494e+07	3.07537e+07	2.98922e+07	3.15387e+07	3.22138e+07	4.79168e+07	4.36569e+07	4.53131e+07	GO:0015031, GO:0006457	atr:18424945||http://www.genome.jp/dbget-bin/www_bget?atr:18424945	---
G7LCC0	26S proteasome non-ATPase regulatory subunit 1 homolog	11407588	26S proteasome non-ATPase regulatory subunit 1 homolog OS=Medicago truncatula OX=3880 GN=11407588 PE=3 SV=1	0	127.732	19	18	76	18	1001	108.7	5.29	222.07	0	1	2.11906e+07	2.26132e+07	2.27351e+07	2.19145e+07	2.08577e+07	2.14179e+07	2.01213e+07	2.06875e+07	2.03713e+07	1.95225e+07	1.9831e+07	2.02254e+07	2.16611e+07	2.06659e+07	2.19272e+07	2.407e+07	2.48169e+07	2.62142e+07	2.05787e+07	2.1668e+07	2.16494e+07	2.09079e+07	2.1128e+07	2.60298e+07	2.21907e+07	2.35526e+07	2.37391e+07	1.8108e+07	1.58712e+07	1.70513e+07	GO:0000502, GO:0042176, GO:0030234	atr:18429908||http://www.genome.jp/dbget-bin/www_bget?atr:18429908	Proteasome
G7I885	Aspartate--tRNA ligase	11427296	Aspartate--tRNA ligase OS=Medicago truncatula OX=3880 GN=11427296 PE=3 SV=1	0	127.48	38	21	109	15	541	60.5	6.4	320.26	7	1	8.82585e+07	8.32786e+07	8.60787e+07	8.1396e+07	8.7987e+07	8.76149e+07	8.83481e+07	9.09551e+07	7.28172e+07	8.80476e+07	7.30039e+07	7.25881e+07	8.15434e+07	8.29229e+07	8.10776e+07	8.61358e+07	8.84303e+07	9.11832e+07	8.61686e+07	8.68907e+07	9.08691e+07	8.9495e+07	8.92699e+07	8.07651e+07	8.56617e+07	8.12492e+07	8.15557e+07	8.56266e+07	8.0642e+07	8.37353e+07	GO:0004812, GO:0000166, GO:0006422, GO:0005524, GO:0006418, GO:0004815, GO:0005737	atr:18429097||http://www.genome.jp/dbget-bin/www_bget?atr:18429097	Aminoacyl-tRNA biosynthesis
A0A072VSL4	Vacuolar proton pump subunit B	25485635	Vacuolar proton pump subunit B OS=Medicago truncatula OX=3880 GN=25485635 PE=3 SV=1	0	126.797	26	15	115	4	489	54.1	5.1	277.13	13	1	4.37238e+07	4.79201e+07	4.75811e+07	5.97632e+07	5.48473e+07	5.92309e+07	6.16655e+07	6.09654e+07	4.78883e+07	6.22848e+07	5.0476e+07	5.0394e+07	8.11959e+07	7.89598e+07	7.84228e+07	4.39289e+07	4.94379e+07	4.96797e+07	6.38717e+07	5.68029e+07	6.27396e+07	5.96642e+07	6.135e+07	5.42024e+07	5.81995e+07	5.4975e+07	5.51143e+07	9.45954e+07	7.65347e+07	8.54972e+07	GO:1902600, GO:0005524, GO:0033180, GO:0046034	atr:18426589||http://www.genome.jp/dbget-bin/www_bget?atr:18426589	Phagosome
G7KAF6	Phospho-2-dehydro-3-deoxyheptonate aldolase	11427371	Phospho-2-dehydro-3-deoxyheptonate aldolase OS=Medicago truncatula OX=3880 GN=11427371 PE=3 SV=1	0	126.232	34	17	113	13	532	59	8.31	324.34	6	1	4.544e+07	4.10086e+07	4.22465e+07	3.43632e+07	3.50424e+07	3.36147e+07	3.40809e+07	3.43273e+07	2.93514e+07	3.35788e+07	3.00394e+07	3.01556e+07	4.09617e+07	4.30735e+07	4.12678e+07	5.30142e+07	3.67404e+07	4.03839e+07	2.86367e+07	3.56212e+07	3.26424e+07	3.52912e+07	3.47322e+07	2.45411e+07	3.27488e+07	2.46953e+07	2.48096e+07	3.3842e+07	3.46126e+07	3.3995e+07	GO:0009073, GO:0003849, GO:0003824	atr:18423389||http://www.genome.jp/dbget-bin/www_bget?atr:18423389	Phenylalanine, tyrosine and tryptophan biosynthesis
A0A072TC88	ATP synthase, F1 beta subunit	MTR_1829s0010	ATP synthase, F1 beta subunit OS=Medicago truncatula OX=3880 GN=MTR_1829s0010 PE=3 SV=1	0	125.347	40	9	123	2	338	37.1	4.96	410.09	0	1	8.77293e+06	9.58398e+06	9.11382e+06	9.90492e+06	8.61273e+06	9.44547e+06	1.04482e+07	9.54599e+06	8.47406e+06	9.90046e+06	9.44511e+06	9.98696e+06	2.53911e+07	2.6746e+07	2.50038e+07	8.31425e+06	1.00576e+07	9.51549e+06	1.13842e+07	9.10744e+06	9.52512e+06	9.78827e+06	9.62448e+06	1.08794e+07	1.00272e+07	1.15524e+07	1.23301e+07	2.56163e+07	2.66858e+07	2.48339e+07	GO:0046933, GO:0045261, GO:0005524, GO:0015986	atr:2546496|atpB, AmtrCp029|http://www.genome.jp/dbget-bin/www_bget?atr:2546496	Photosynthesis
G4W9I5	Glutamate-1-semialdehyde 2,1-aminomutase	GSA	Glutamate-1-semialdehyde 2,1-aminomutase OS=Medicago truncatula OX=3880 GN=GSA PE=2 SV=1	0	125.182	32	13	69	13	468	49.7	6.57	218.2	0	1	2.72366e+07	3.22295e+07	3.14956e+07	3.48116e+07	3.20901e+07	3.43351e+07	3.12551e+07	3.27495e+07	2.98951e+07	2.98191e+07	3.09472e+07	3.11483e+07	5.4424e+07	5.01146e+07	5.30653e+07	2.40882e+07	2.79626e+07	2.82065e+07	3.11771e+07	3.01652e+07	3.26709e+07	2.73973e+07	2.82827e+07	2.54513e+07	2.68345e+07	2.63963e+07	2.68045e+07	6.04155e+07	5.08414e+07	5.61816e+07	GO:0003824, GO:0030170, GO:0008483, GO:0042286, GO:0033014	atr:18434459||http://www.genome.jp/dbget-bin/www_bget?atr:18434459	Porphyrin and chlorophyll metabolism
A0A072VKL5	S-adenosylmethionine synthase	25483956	S-adenosylmethionine synthase OS=Medicago truncatula OX=3880 GN=25483956 PE=3 SV=1	0	125.034	39	12	152	2	390	42.7	6.95	479.61	0	1	1.22742e+06	1.43353e+06	1.40881e+06	1.74529e+06	1.45952e+06	1.44175e+06	1.68204e+06	1.44405e+06	1.59068e+06	1.69757e+06	1.77688e+06	1.75241e+06	1.85875e+06	1.82763e+06	1.78738e+06	1.17548e+06	1.58569e+06	1.30546e+06	1.76827e+06	1.36329e+06	1.42545e+06	1.59027e+06	1.37016e+06	2.18589e+06	1.61795e+06	2.51405e+06	2.36062e+06	1.98954e+06	1.92647e+06	1.89945e+06	GO:0005524, GO:0006556, GO:0004478	atr:18445115||http://www.genome.jp/dbget-bin/www_bget?atr:18445115	Cysteine and methionine metabolism
I3S2B0	Malate dehydrogenase		Malate dehydrogenase OS=Medicago truncatula OX=3880 PE=2 SV=1	0	124.988	39	13	79	3	332	35.7	6.54	221.85	0	1	5.34666e+06	4.49729e+06	4.86232e+06	3.64388e+06	3.27158e+06	3.40609e+06	3.15442e+06	3.38799e+06	3.33829e+06	3.16862e+06	3.29744e+06	3.37784e+06	6.40024e+06	3.96699e+06	6.6375e+06	4.64971e+06	3.98115e+06	4.23098e+06	3.95298e+06	3.81356e+06	4.06562e+06	4.22881e+06	4.06061e+06	3.7089e+06	4.03301e+06	3.70751e+06	3.75332e+06	6.84996e+06	6.80687e+06	6.83696e+06	GO:0003824, GO:0016615, GO:0006108, GO:0016616, GO:0030060, GO:0019752, GO:0005975, GO:0016491	atr:18428843||http://www.genome.jp/dbget-bin/www_bget?atr:18428843	Citrate cycle (TCA cycle)
I3S1P8	Porin/voltage-dependent anion-selective channel protein	25495274	Porin/voltage-dependent anion-selective channel protein OS=Medicago truncatula OX=3880 GN=25495274 PE=2 SV=1	0	124.792	53	13	81	10	278	30	9.03	247.88	1	1	3.18643e+07	4.17693e+07	4.17012e+07	3.88277e+07	3.23549e+07	3.39297e+07	2.96948e+07	2.93822e+07	2.63481e+07	2.73948e+07	3.02316e+07	2.92739e+07	6.75301e+07	6.46696e+07	6.711e+07	3.37381e+07	3.61922e+07	3.86652e+07	3.2995e+07	3.14383e+07	3.36584e+07	3.11633e+07	3.13503e+07	2.53888e+07	3.02395e+07	2.68153e+07	2.65952e+07	5.54494e+07	5.2757e+07	5.46254e+07	GO:0055085, GO:0098656, GO:0008308, GO:0005741	atr:18431941||http://www.genome.jp/dbget-bin/www_bget?atr:18431941	---
G7J4F9	Light-harvesting complex I chlorophyll A/B-binding protein	11419130	Light-harvesting complex I chlorophyll A/B-binding protein OS=Medicago truncatula OX=3880 GN=11419130 PE=2 SV=1	0	124.508	25	6	172	6	270	28.9	6.77	422.07	0	1	2.0008e+08	3.06498e+08	2.87964e+08	3.78702e+08	2.56942e+08	2.86976e+08	2.59844e+08	2.54973e+08	4.00943e+08	2.54172e+08	3.92429e+08	3.79962e+08	2.28932e+08	2.38485e+08	2.35518e+08	1.86482e+08	3.2259e+08	2.92839e+08	4.14973e+08	2.62005e+08	3.05839e+08	2.76278e+08	2.55692e+08	4.33805e+08	2.78024e+08	4.41382e+08	4.27153e+08	2.22859e+08	2.30362e+08	2.31503e+08	---	atr:18436726||http://www.genome.jp/dbget-bin/www_bget?atr:18436726	Photosynthesis
A0A396I2X2	ATP synthase subunit beta	MtrunA17_Chr4g0003551	ATP synthase subunit beta OS=Medicago truncatula OX=3880 GN=MtrunA17_Chr4g0003551 PE=3 SV=1	0	124.368	53	5	48	2	128	13.6	5.38	183.24	0	1	5.88729e+06	5.52604e+06	5.67903e+06	5.6304e+06	6.61225e+06	6.68228e+06	6.63977e+06	6.96575e+06	5.30254e+06	6.82981e+06	5.50308e+06	5.95261e+06	2.01984e+07	1.39499e+07	1.73113e+07	5.0091e+06	4.56573e+06	4.46311e+06	4.55023e+06	5.52928e+06	5.42319e+06	5.2286e+06	5.3397e+06	4.6169e+06	6.08913e+06	5.09392e+06	5.35261e+06	2.23063e+07	1.08105e+07	1.82996e+07	GO:0046034, GO:1902600	None	---
I3SWT6	Tubulin beta chain		Tubulin beta chain OS=Medicago truncatula OX=3880 PE=2 SV=1	0	124.349	30	13	88	3	406	45.3	6.35	245.92	0	1	4.67657e+06	4.33409e+06	4.68974e+06	3.9992e+06	3.96638e+06	3.98888e+06	4.3468e+06	4.14861e+06	3.24389e+06	4.34815e+06	3.23493e+06	3.25493e+06	3.40106e+06	3.48372e+06	3.45751e+06	4.44578e+06	4.4087e+06	4.65646e+06	3.75073e+06	4.10646e+06	4.20543e+06	4.15482e+06	4.04886e+06	3.4429e+06	4.00555e+06	3.17539e+06	3.21781e+06	2.86065e+06	2.98787e+06	2.92359e+06	GO:0005874, GO:0003924, GO:0005200, GO:0005525, GO:0007017	atr:18443057||http://www.genome.jp/dbget-bin/www_bget?atr:18443057	Phagosome
A0A396I9J9	Cysteine synthase	MtrunA17_Chr4g0045781	Cysteine synthase OS=Medicago truncatula OX=3880 GN=MtrunA17_Chr4g0045781 PE=3 SV=1	0	124.295	42	13	74	11	383	40.7	6.93	236.91	2	1	5.1489e+07	4.8276e+07	4.6786e+07	4.35821e+07	4.80889e+07	4.68519e+07	4.59636e+07	4.67789e+07	3.97375e+07	4.34913e+07	4.15675e+07	4.23865e+07	7.63649e+07	7.04927e+07	7.31269e+07	4.33468e+07	4.671e+07	4.47502e+07	4.60871e+07	4.63479e+07	4.7261e+07	4.50669e+07	4.68203e+07	4.34138e+07	4.54125e+07	4.50835e+07	4.50464e+07	8.25637e+07	6.76418e+07	7.48899e+07	GO:0006535, GO:0004124	atr:18448662||http://www.genome.jp/dbget-bin/www_bget?atr:18448662	Sulfur metabolism
A0A072VYH6	Fungal proteinase A, aspartic proteinase superfamily protein	25485793	Fungal proteinase A, aspartic proteinase superfamily protein OS=Medicago truncatula OX=3880 GN=25485793 PE=3 SV=1	0	124.241	14	8	153	8	508	55.6	5.8	472.45	0	1	2.57003e+08	2.89021e+08	3.05622e+08	2.50871e+08	2.31497e+08	2.36866e+08	2.30262e+08	2.25301e+08	4.11474e+08	2.28258e+08	3.66513e+08	3.65958e+08	1.07161e+08	1.07021e+08	1.09635e+08	2.59755e+08	2.8208e+08	2.97045e+08	2.44493e+08	2.45478e+08	2.59004e+08	2.22745e+08	2.21795e+08	4.15946e+08	2.19923e+08	3.73706e+08	3.58874e+08	1.02277e+08	1.00922e+08	1.0462e+08	GO:0006629, GO:0006508, GO:0004190	atr:18430140||http://www.genome.jp/dbget-bin/www_bget?atr:18430140	---
A0A072UQA3	26S proteasome regulatory particle triple-A ATPase protein	25493284	26S proteasome regulatory particle triple-A ATPase protein OS=Medicago truncatula OX=3880 GN=25493284 PE=3 SV=1	0	124.203	44	17	91	15	417	47.1	8.76	238.04	2	1	2.7931e+07	3.02768e+07	3.06214e+07	3.39544e+07	3.25795e+07	3.49738e+07	3.34681e+07	3.28229e+07	3.15631e+07	3.20868e+07	3.06071e+07	3.11843e+07	2.12204e+07	2.22187e+07	2.15259e+07	3.00361e+07	2.69572e+07	2.81978e+07	2.83455e+07	3.08745e+07	3.14312e+07	3.01997e+07	3.13082e+07	2.5198e+07	3.01536e+07	2.46338e+07	2.46762e+07	2.52777e+07	2.56821e+07	2.552e+07	GO:0030163, GO:0016887, GO:0005524, GO:0036402, GO:0005737	atr:18433776||http://www.genome.jp/dbget-bin/www_bget?atr:18433776	Proteasome
A0A072VMC4	Malate dehydrogenase	25484448	Malate dehydrogenase OS=Medicago truncatula OX=3880 GN=25484448 PE=3 SV=1	0	124.102	45	14	81	3	332	35.6	6.55	221.44	13	1	2.16502e+07	2.048e+07	2.04124e+07	2.33385e+07	2.42713e+07	2.46498e+07	2.54499e+07	2.65275e+07	1.75453e+07	2.48132e+07	1.93673e+07	1.94149e+07	5.27032e+07	4.01836e+07	4.6135e+07	2.15435e+07	2.05211e+07	2.04942e+07	2.31201e+07	2.50625e+07	2.62404e+07	2.53898e+07	2.68778e+07	1.9042e+07	2.60882e+07	2.02003e+07	2.03373e+07	4.72192e+07	4.61357e+07	4.55855e+07	GO:0003824, GO:0006108, GO:0016615, GO:0016616, GO:0030060, GO:0005975, GO:0016491, GO:0019752	atr:18428843||http://www.genome.jp/dbget-bin/www_bget?atr:18428843	Citrate cycle (TCA cycle)
G7L8T3	Guanosine nucleotide diphosphate dissociation inhibitor	11422618	Guanosine nucleotide diphosphate dissociation inhibitor OS=Medicago truncatula OX=3880 GN=11422618 PE=2 SV=1	0	124.063	34	13	80	13	444	49.7	5.88	176.16	0	1	2.67899e+07	2.04547e+07	2.06494e+07	2.04546e+07	2.45342e+07	2.33704e+07	2.57761e+07	2.55739e+07	2.60785e+07	2.73731e+07	2.37622e+07	2.56601e+07	2.82013e+07	2.79859e+07	2.77979e+07	2.8589e+07	2.39286e+07	2.4642e+07	2.33571e+07	2.74365e+07	2.65062e+07	3.06502e+07	2.91466e+07	2.71162e+07	3.10291e+07	2.52928e+07	2.59091e+07	3.42854e+07	2.77165e+07	3.11221e+07	GO:0007264, GO:0015031, GO:0005092, GO:0005093	atr:18448571||http://www.genome.jp/dbget-bin/www_bget?atr:18448571	---
A0A396HLB1	Phosphopyruvate hydratase	MtrunA17_Chr6g0476311	Phosphopyruvate hydratase OS=Medicago truncatula OX=3880 GN=MtrunA17_Chr6g0476311 PE=3 SV=1	0	123.701	30	10	98	4	446	48.1	6.37	264.27	0	1	5.57613e+06	5.4121e+06	6.02287e+06	4.46604e+06	4.72689e+06	4.69522e+06	4.43307e+06	4.72943e+06	4.23685e+06	4.46898e+06	4.25748e+06	4.37749e+06	5.55859e+06	5.71302e+06	5.4846e+06	4.92508e+06	6.01433e+06	6.45745e+06	4.20306e+06	4.54692e+06	4.32177e+06	3.74595e+06	4.05293e+06	4.27008e+06	4.02485e+06	4.36992e+06	4.124e+06	6.82768e+06	7.09722e+06	6.85798e+06	GO:0004634, GO:0006096, GO:0000015, GO:0000287	atr:18441538||http://www.genome.jp/dbget-bin/www_bget?atr:18441538	RNA degradation
A0A072V740	Sucrose synthase	25486575	Sucrose synthase OS=Medicago truncatula OX=3880 GN=25486575 PE=3 SV=1	0	123.496	27	21	89	17	804	92.2	6.32	270.65	4	1	3.64187e+07	3.93528e+07	4.31438e+07	2.77499e+07	2.78114e+07	2.75135e+07	2.41525e+07	2.35657e+07	2.22981e+07	2.32815e+07	2.29555e+07	2.20767e+07	2.3668e+07	2.43599e+07	2.41901e+07	3.6263e+07	2.97449e+07	3.28787e+07	2.43209e+07	2.71616e+07	2.65626e+07	2.22012e+07	2.18748e+07	2.33012e+07	2.1715e+07	2.31131e+07	2.27817e+07	2.211e+07	2.25713e+07	2.21316e+07	GO:0005985, GO:0016157, GO:0016757	atr:18428723||http://www.genome.jp/dbget-bin/www_bget?atr:18428723	Starch and sucrose metabolism
A0A072UGE8	Formate dehydrogenase, mitochondrial	25495172	Formate dehydrogenase, mitochondrial OS=Medicago truncatula OX=3880 GN=25495172 PE=3 SV=1	0	123.384	40	15	82	9	386	42.2	6.99	241.11	7	1	4.34129e+07	3.68522e+07	3.88056e+07	3.33169e+07	3.8621e+07	3.842e+07	3.94621e+07	4.05334e+07	3.03294e+07	3.99013e+07	3.1187e+07	3.13462e+07	4.06351e+07	4.20287e+07	4.00451e+07	4.33116e+07	3.87576e+07	3.90673e+07	3.64042e+07	4.30017e+07	4.16331e+07	4.45807e+07	4.56744e+07	3.2519e+07	4.58289e+07	3.29982e+07	3.29208e+07	4.13723e+07	4.24274e+07	4.0227e+07	GO:0016616, GO:0051287, GO:0008863	atr:18434836||http://www.genome.jp/dbget-bin/www_bget?atr:18434836	Glyoxylate and dicarboxylate metabolism
I3SC37	Allergenic isoflavone reductase-like protein Bet protein	25490199	Allergenic isoflavone reductase-like protein Bet protein OS=Medicago truncatula OX=3880 GN=25490199 PE=2 SV=1	0	122.874	39	13	145	13	310	34.3	6.67	413.57	0	1	9.75743e+07	1.00269e+08	1.01587e+08	1.03171e+08	1.07246e+08	1.09888e+08	1.10133e+08	1.09457e+08	7.292e+07	1.04091e+08	7.9715e+07	8.16533e+07	1.93092e+08	1.92876e+08	1.87673e+08	8.92686e+07	9.23038e+07	9.29623e+07	9.60781e+07	1.05103e+08	1.10719e+08	1.01124e+08	1.04377e+08	6.51765e+07	1.00832e+08	7.14786e+07	7.40534e+07	1.79141e+08	1.78931e+08	1.72329e+08	---	atr:18422627||http://www.genome.jp/dbget-bin/www_bget?atr:18422627	---
G7IRF6	50S ribosomal protein L14	MTR_2g087550	50S ribosomal protein L14 OS=Medicago truncatula OX=3880 GN=MTR_2g087550 PE=3 SV=1	0	122.501	49	12	90	8	209	23	9.89	264.41	7	1	7.02453e+07	6.76362e+07	7.15232e+07	7.00748e+07	7.1053e+07	7.40769e+07	8.10211e+07	8.18467e+07	7.27883e+07	7.9176e+07	6.92126e+07	7.03739e+07	6.03925e+07	6.36073e+07	6.1816e+07	7.55259e+07	7.24726e+07	7.34909e+07	7.86733e+07	7.90555e+07	8.16376e+07	9.05951e+07	9.1699e+07	7.58125e+07	9.10904e+07	7.37739e+07	7.35902e+07	6.26865e+07	6.46122e+07	6.43303e+07	GO:0006412, GO:0015934, GO:0005840, GO:0003735	atr:2546611|rpl14, AmtrCp060|http://www.genome.jp/dbget-bin/www_bget?atr:2546611	Ribosome
G7LIY2	Lipoxygenase	11424965	Lipoxygenase OS=Medicago truncatula OX=3880 GN=11424965 PE=3 SV=1	0	122.234	15	15	125	1	870	98.2	6.24	365.73	0	1	9.51263e+06	8.64346e+06	9.18889e+06	8.0442e+06	8.39736e+06	7.62612e+06	4.51722e+06	4.48037e+06	5.84677e+06	4.268e+06	6.40771e+06	6.11926e+06	4.63231e+06	4.76291e+06	4.51232e+06	7.8836e+06	7.94357e+06	7.80418e+06	7.32942e+06	7.72537e+06	7.42567e+06	4.42328e+06	4.42311e+06	5.5214e+06	4.49173e+06	5.92221e+06	5.77735e+06	4.50793e+06	4.86031e+06	4.84756e+06	GO:0005515, GO:0046872, GO:0016491, GO:0016702	atr:18439893||http://www.genome.jp/dbget-bin/www_bget?atr:18439893	---
G7L9V7	Pectinesterase	11445926	Pectinesterase OS=Medicago truncatula OX=3880 GN=11445926 PE=3 SV=1	0	121.691	26	13	98	10	589	64.5	8.87	318.77	3	1	7.63435e+07	8.76194e+07	8.76074e+07	6.59231e+07	5.72633e+07	5.75973e+07	5.51218e+07	5.33148e+07	6.45342e+07	5.57072e+07	6.47893e+07	6.4057e+07	5.27452e+07	5.47806e+07	5.41553e+07	7.8284e+07	8.7371e+07	8.79293e+07	6.42737e+07	5.83012e+07	5.87727e+07	5.9713e+07	5.49605e+07	6.70582e+07	6.29994e+07	6.72039e+07	6.53278e+07	5.22018e+07	5.3181e+07	5.36532e+07	GO:0004857, GO:0030599, GO:0042545	atr:18423947||http://www.genome.jp/dbget-bin/www_bget?atr:18423947	Pentose and glucuronate interconversions
G7KLS1	Chaperone protein ClpB3	11412992	Chaperone protein ClpB3 OS=Medicago truncatula OX=3880 GN=11412992 PE=3 SV=1	0	121.616	24	23	70	20	974	109.9	7.09	215.31	4	1	1.65179e+07	1.66251e+07	1.59159e+07	1.77586e+07	1.80481e+07	1.79939e+07	1.84139e+07	1.86939e+07	1.81819e+07	1.93086e+07	1.84735e+07	1.90828e+07	2.94972e+07	3.01416e+07	2.92025e+07	1.75411e+07	1.84521e+07	1.90677e+07	1.85431e+07	1.75309e+07	1.92319e+07	1.85467e+07	1.77612e+07	1.97479e+07	1.77128e+07	1.90004e+07	1.91727e+07	2.64755e+07	2.58397e+07	2.67292e+07	GO:0042026, GO:0009408, GO:0005737, GO:0016887, GO:0005524	atr:18427935||http://www.genome.jp/dbget-bin/www_bget?atr:18427935	---
G7IRR3	4-hydroxy-3-methylbut-2-enyl diphosphate synthase	11413255	4-hydroxy-3-methylbut-2-enyl diphosphate synthase OS=Medicago truncatula OX=3880 GN=11413255 PE=3 SV=2	0	121.141	29	20	97	20	740	82.2	6.21	273.94	0	1	2.87534e+07	2.59694e+07	2.57553e+07	2.98673e+07	3.29146e+07	3.3082e+07	3.56665e+07	3.57378e+07	3.56958e+07	3.45108e+07	3.37815e+07	3.45086e+07	3.14602e+07	3.31547e+07	3.14546e+07	2.52698e+07	2.39162e+07	2.34823e+07	2.76751e+07	3.01845e+07	3.12338e+07	3.32232e+07	3.2506e+07	4.67669e+07	3.35412e+07	4.00673e+07	4.23148e+07	2.83125e+07	2.84748e+07	2.78456e+07	GO:0016114, GO:0046429, GO:0005506, GO:0008299, GO:0044237	atr:18444271||http://www.genome.jp/dbget-bin/www_bget?atr:18444271	Terpenoid backbone biosynthesis
G7KYU2	Outer plastidial membrane protein porin	11422377	Outer plastidial membrane protein porin OS=Medicago truncatula OX=3880 GN=11422377 PE=3 SV=1	0	120.646	46	9	59	8	277	29.6	8.88	212.34	0	1	2.3544e+07	2.29107e+07	2.4103e+07	2.28559e+07	2.412e+07	2.42985e+07	2.41946e+07	2.4272e+07	2.18552e+07	2.27604e+07	2.26956e+07	2.31541e+07	3.89283e+07	3.00493e+07	3.74945e+07	2.35376e+07	2.49319e+07	2.41884e+07	2.58968e+07	2.42641e+07	2.50653e+07	2.15918e+07	2.26526e+07	2.2494e+07	2.17998e+07	2.43079e+07	2.42807e+07	4.88999e+07	3.43627e+07	4.2465e+07	GO:0098656, GO:0008308, GO:0005741, GO:0055085	atr:18431941||http://www.genome.jp/dbget-bin/www_bget?atr:18431941	---
Q1SL16	Elongation factor 1, gamma chain; Glutathione S-transferase, C-terminal; Thioredoxin-like fold	11419764	Elongation factor 1, gamma chain; Glutathione S-transferase, C-terminal; Thioredoxin-like fold OS=Medicago truncatula OX=3880 GN=11419764 PE=2 SV=1	0	120.508	35	13	95	5	418	47.7	6.89	273.73	10	1	4.74592e+07	5.56538e+07	5.4046e+07	5.72385e+07	5.10274e+07	5.31999e+07	5.58984e+07	5.39144e+07	5.33238e+07	5.07706e+07	5.36165e+07	5.24295e+07	7.23388e+07	6.02679e+07	6.67957e+07	5.37833e+07	5.86077e+07	5.73783e+07	5.96643e+07	5.58504e+07	5.87646e+07	6.05677e+07	5.71055e+07	5.96022e+07	5.92276e+07	6.12054e+07	6.02596e+07	5.29444e+07	5.52775e+07	5.37021e+07	GO:0005515, GO:0003746, GO:0004364, GO:0006749, GO:0006414	atr:18435694||http://www.genome.jp/dbget-bin/www_bget?atr:18435694	---
G7J4Y2	L-ascorbate peroxidase	11414804	L-ascorbate peroxidase OS=Medicago truncatula OX=3880 GN=11414804 PE=3 SV=1	0	120.505	38	17	104	17	436	47.4	8.95	297.49	0	1	2.27623e+07	2.43415e+07	2.39564e+07	2.36822e+07	2.27005e+07	2.35049e+07	2.31309e+07	2.28428e+07	2.48915e+07	2.34054e+07	2.62147e+07	2.77206e+07	6.66354e+07	6.5991e+07	6.25448e+07	2.56208e+07	2.59789e+07	2.61884e+07	2.64021e+07	2.77518e+07	2.83611e+07	2.69959e+07	2.81879e+07	2.80863e+07	2.79523e+07	2.87867e+07	2.92049e+07	5.85159e+07	5.49175e+07	5.42087e+07	GO:0004601, GO:0006979, GO:0034599, GO:0020037	atr:18436903||http://www.genome.jp/dbget-bin/www_bget?atr:18436903	Ascorbate and aldarate metabolism
A0A072VM58	Dolichyl-diphosphooligosaccharide--protein glycosyltransferase subunit 2	25484247	Dolichyl-diphosphooligosaccharide--protein glycosyltransferase subunit 2 OS=Medicago truncatula OX=3880 GN=25484247 PE=3 SV=1	0	119.674	23	13	62	12	689	74.7	7.74	211.65	1	1	3.76733e+07	3.46309e+07	3.69008e+07	3.43545e+07	3.68119e+07	3.69019e+07	3.56792e+07	3.30987e+07	3.85727e+07	3.52497e+07	3.5936e+07	3.66168e+07	2.70161e+07	2.81767e+07	2.75164e+07	3.56059e+07	3.55642e+07	3.68434e+07	3.70562e+07	3.91848e+07	4.00411e+07	3.83424e+07	3.68315e+07	4.32668e+07	3.72057e+07	3.96955e+07	4.11874e+07	3.05692e+07	3.09198e+07	3.10359e+07	GO:0008250, GO:0016021, GO:0006487	atr:18447158||http://www.genome.jp/dbget-bin/www_bget?atr:18447158	N-Glycan biosynthesis
A0A072U8Q5	Proteasome subunit alpha type	25495758	Proteasome subunit alpha type OS=Medicago truncatula OX=3880 GN=25495758 PE=3 SV=1	0	119.67	49	12	77	12	249	27.3	5.87	216.89	0	1	3.36845e+07	3.10412e+07	3.24562e+07	3.09126e+07	3.37712e+07	3.45947e+07	3.31918e+07	3.53253e+07	2.69169e+07	3.3602e+07	2.72266e+07	2.72148e+07	3.9758e+07	4.04894e+07	4.00864e+07	3.31393e+07	3.02376e+07	3.17629e+07	3.14737e+07	3.52071e+07	3.56847e+07	3.35972e+07	3.39023e+07	2.86087e+07	3.34502e+07	2.87761e+07	2.93616e+07	3.85536e+07	3.99486e+07	3.80661e+07	GO:0006511, GO:0051603, GO:0019773, GO:0005839	atr:18426186||http://www.genome.jp/dbget-bin/www_bget?atr:18426186	Proteasome
A0A072UX55	RNA-binding (RRM/RBD/RNP motif) family protein	11413934	RNA-binding (RRM/RBD/RNP motif) family protein OS=Medicago truncatula OX=3880 GN=11413934 PE=4 SV=1	0	118.996	46	5	193	4	128	12.9	4.88	579.1	0	1	3.64675e+07	3.31754e+07	3.348e+07	3.5743e+07	3.97422e+07	3.97918e+07	4.32279e+07	4.43019e+07	3.33284e+07	4.33357e+07	3.37841e+07	3.3346e+07	4.08551e+07	3.50207e+07	4.3198e+07	3.57331e+07	3.45877e+07	3.35414e+07	3.81983e+07	4.11684e+07	4.24182e+07	4.46158e+07	4.53051e+07	3.84491e+07	4.50706e+07	3.86982e+07	3.81744e+07	5.10613e+07	4.59165e+07	4.8811e+07	GO:0003676	atr:18444411||http://www.genome.jp/dbget-bin/www_bget?atr:18444411	---
G7K4T4	Fructose-bisphosphate aldolase	11433706	Fructose-bisphosphate aldolase OS=Medicago truncatula OX=3880 GN=11433706 PE=2 SV=1	0	118.726	41	11	93	8	357	38.3	6.15	317.66	0	1	2.02116e+07	2.22643e+07	2.14971e+07	2.22242e+07	2.10433e+07	2.14369e+07	2.13117e+07	2.13081e+07	2.14803e+07	2.24322e+07	2.56629e+07	2.65307e+07	1.21121e+08	1.23215e+08	1.14309e+08	2.65692e+07	2.78135e+07	2.62817e+07	2.93171e+07	3.07772e+07	3.23826e+07	3.031e+07	3.02376e+07	3.13064e+07	3.01984e+07	3.39657e+07	3.45978e+07	1.03999e+08	9.84224e+07	9.90354e+07	GO:0004332, GO:0003824, GO:0006096	atr:18447524||http://www.genome.jp/dbget-bin/www_bget?atr:18447524	Fructose and mannose metabolism
A0A072V1Y6	NAD-dependent epimerase/dehydratase family protein	11444988	NAD-dependent epimerase/dehydratase family protein OS=Medicago truncatula OX=3880 GN=11444988 PE=4 SV=1	0	118.519	65	14	82	14	252	27.2	5.76	252.31	0	1	2.1064e+07	2.43065e+07	2.36435e+07	2.29001e+07	2.13449e+07	2.07336e+07	2.15841e+07	2.02903e+07	2.47681e+07	2.0663e+07	2.69805e+07	2.37099e+07	3.12949e+07	3.28184e+07	3.15822e+07	1.94226e+07	2.34587e+07	2.25922e+07	2.31359e+07	2.07333e+07	2.11028e+07	2.06091e+07	2.12737e+07	2.16718e+07	2.04165e+07	2.31178e+07	2.29959e+07	3.36598e+07	3.42879e+07	3.30948e+07	---	atr:18437234||http://www.genome.jp/dbget-bin/www_bget?atr:18437234	---
G7KPN3	Glutamate dehydrogenase	11414500	Glutamate dehydrogenase OS=Medicago truncatula OX=3880 GN=11414500 PE=3 SV=1	0	118.278	29	11	73	6	411	44.5	6.8	205.75	7	1	5.63101e+07	5.08692e+07	6.81957e+07	3.07168e+07	3.46375e+07	3.24675e+07	3.14525e+07	3.11602e+07	2.89933e+07	3.04967e+07	2.97006e+07	2.85103e+07	2.453e+07	2.51339e+07	2.53339e+07	5.51256e+07	5.49473e+07	6.03196e+07	3.99266e+07	3.80818e+07	3.66905e+07	3.5227e+07	3.57176e+07	3.80269e+07	3.46374e+07	3.9753e+07	3.78791e+07	2.54574e+07	2.63687e+07	2.63988e+07	GO:0016491, GO:0006520, GO:0016639	atr:18421426||http://www.genome.jp/dbget-bin/www_bget?atr:18421426	Nitrogen metabolism
A0A072VNF7	Putative tripeptidyl-peptidase II	25484584	Putative tripeptidyl-peptidase II OS=Medicago truncatula OX=3880 GN=25484584 PE=3 SV=1	0	118.05	17	8	84	7	760	82.4	8.28	303.29	0	1	2.03441e+07	1.70014e+07	1.81859e+07	1.47067e+07	1.4855e+07	1.4487e+07	1.50975e+07	1.55296e+07	1.51076e+07	1.44332e+07	1.53479e+07	1.48083e+07	1.36766e+07	1.41518e+07	1.40324e+07	2.28666e+07	1.75829e+07	1.95698e+07	1.2779e+07	1.38412e+07	1.32544e+07	1.3572e+07	1.36095e+07	1.36214e+07	1.26739e+07	1.3351e+07	1.31795e+07	1.38427e+07	1.38986e+07	1.37045e+07	GO:0008236, GO:0004252, GO:0006508	atr:18436822||http://www.genome.jp/dbget-bin/www_bget?atr:18436822	---
G7IM82	Peroxidase	11407145	Peroxidase OS=Medicago truncatula OX=3880 GN=11407145 PE=3 SV=1	0	118.049	26	7	115	2	318	34.2	8.4	348.21	7	1	1.99441e+08	1.4993e+08	1.70956e+08	9.72397e+07	1.11278e+08	1.05011e+08	1.04877e+08	1.10938e+08	1.12411e+08	1.1027e+08	1.02026e+08	1.05169e+08	4.71806e+07	4.79315e+07	4.83756e+07	1.94286e+08	1.58098e+08	1.77409e+08	1.00028e+08	1.18641e+08	1.08751e+08	1.09926e+08	1.18167e+08	9.41327e+07	1.10424e+08	9.12954e+07	9.08137e+07	5.42413e+07	5.54137e+07	5.52443e+07	GO:0006979, GO:0004601, GO:0042744, GO:0020037	atr:18426338||http://www.genome.jp/dbget-bin/www_bget?atr:18426338	Phenylpropanoid biosynthesis
G7KTF0	Putative tripeptidyl-peptidase II	11439974	Putative tripeptidyl-peptidase II OS=Medicago truncatula OX=3880 GN=11439974 PE=3 SV=1	0	118.006	14	9	157	2	787	84.5	9.26	497.52	0	1	963547	1.09874e+06	1.21039e+06	834606	905849	850655	929323	833132	951189	874729	999593	997076	828478	896498	813536	2.26482e+06	1.69317e+06	2.33349e+06	481583	646322	495684	529583	504521	568596	527019	593419	581278	485488	525374	489507	GO:0006508, GO:0008236, GO:0004252	atr:18447486||http://www.genome.jp/dbget-bin/www_bget?atr:18447486	---
G7IU57	Carbamoyl-phosphate synthase (glutamine-hydrolyzing)	11418051	Carbamoyl-phosphate synthase (glutamine-hydrolyzing) OS=Medicago truncatula OX=3880 GN=11418051 PE=3 SV=1	0	117.987	17	22	77	22	1166	127.5	5.45	217.26	0	1	2.52471e+07	2.76893e+07	2.53905e+07	3.03532e+07	2.91452e+07	3.0392e+07	3.10293e+07	3.16277e+07	2.52277e+07	3.01746e+07	2.6176e+07	2.65e+07	3.55169e+07	3.55373e+07	3.54843e+07	2.58881e+07	2.71476e+07	2.48426e+07	2.93832e+07	2.9531e+07	3.11462e+07	3.0616e+07	3.08273e+07	2.74221e+07	2.99432e+07	2.83874e+07	2.79012e+07	3.26986e+07	3.3059e+07	3.26874e+07	GO:0005524, GO:0046872, GO:0006807	atr:18438160||http://www.genome.jp/dbget-bin/www_bget?atr:18438160	Pyrimidine metabolism
B7FLQ8	Uncharacterized protein (Fragment)		Uncharacterized protein (Fragment) OS=Medicago truncatula OX=3880 PE=2 SV=1	0	117.79	33	17	77	17	393	45.5	5.43	222.71	0	1	1.92107e+07	2.18173e+07	2.09223e+07	2.47575e+07	2.16403e+07	2.33038e+07	2.32827e+07	2.23381e+07	2.87989e+07	2.45103e+07	2.80743e+07	2.94878e+07	5.38423e+07	5.36641e+07	5.11048e+07	2.29463e+07	2.34624e+07	2.30487e+07	2.44304e+07	2.2051e+07	2.48663e+07	2.31361e+07	2.22607e+07	2.82171e+07	2.40064e+07	2.7582e+07	2.85938e+07	4.92176e+07	5.0976e+07	4.85727e+07	GO:0005783, GO:0051082, GO:0005509, GO:0005515, GO:0006457	atr:18448729||http://www.genome.jp/dbget-bin/www_bget?atr:18448729	Phagosome
G7J8R4	NADH-ubiquinone oxidoreductase 75 kDa subunit	11410310	NADH-ubiquinone oxidoreductase 75 kDa subunit OS=Medicago truncatula OX=3880 GN=11410310 PE=3 SV=1	0	117.751	29	17	64	17	739	80.7	7.36	199.05	0	1	2.39349e+07	2.44035e+07	2.34436e+07	2.8943e+07	2.87769e+07	2.97813e+07	2.89964e+07	3.00521e+07	2.46785e+07	2.91444e+07	2.6182e+07	2.65834e+07	3.95454e+07	3.70441e+07	4.06758e+07	2.53381e+07	2.40592e+07	2.34774e+07	2.89114e+07	2.95468e+07	3.0965e+07	3.40082e+07	3.56172e+07	2.63142e+07	3.43716e+07	2.63669e+07	2.67352e+07	3.76601e+07	3.80501e+07	3.69027e+07	GO:0051536, GO:0042773, GO:0016020, GO:0016651, GO:0016491, GO:0008137	atr:18439560||http://www.genome.jp/dbget-bin/www_bget?atr:18439560	Oxidative phosphorylation
G7IMZ7	Lysine--tRNA ligase	11443601	Lysine--tRNA ligase OS=Medicago truncatula OX=3880 GN=11443601 PE=3 SV=1	0	117.581	23	15	73	15	604	69	6.34	230.81	0	1	2.26766e+07	2.46119e+07	2.42917e+07	2.56116e+07	2.51252e+07	2.58606e+07	2.54779e+07	2.64141e+07	2.6241e+07	2.57061e+07	2.75519e+07	2.62689e+07	2.62013e+07	2.67421e+07	2.59764e+07	2.37442e+07	2.24322e+07	2.27086e+07	2.38061e+07	2.5796e+07	2.63445e+07	2.63345e+07	2.73122e+07	2.44556e+07	2.60525e+07	2.46554e+07	2.44607e+07	2.45823e+07	2.47636e+07	2.43287e+07	GO:0006430, GO:0003676, GO:0005737, GO:0005524, GO:0004824, GO:0000166, GO:0004812, GO:0006418	atr:18448276||http://www.genome.jp/dbget-bin/www_bget?atr:18448276	Aminoacyl-tRNA biosynthesis
G7K2Q8	Threonyl-tRNA synthetase	11405640	Threonyl-tRNA synthetase OS=Medicago truncatula OX=3880 GN=11405640 PE=3 SV=1	0	117.332	24	19	70	19	711	82	7.02	185.6	0	1	2.93474e+07	3.02617e+07	3.11993e+07	3.29351e+07	3.16612e+07	3.36249e+07	3.05239e+07	3.07809e+07	3.19658e+07	3.13581e+07	3.30013e+07	3.31781e+07	3.64523e+07	3.0844e+07	3.28219e+07	3.02952e+07	3.44048e+07	3.54679e+07	3.71655e+07	3.40106e+07	3.68168e+07	3.22983e+07	3.135e+07	3.90371e+07	3.23066e+07	3.73075e+07	3.72038e+07	3.2654e+07	3.31281e+07	3.30159e+07	GO:0006418, GO:0006435, GO:0004812, GO:0000166, GO:0004829, GO:0005524, GO:0043039, GO:0005737	atr:18427561||http://www.genome.jp/dbget-bin/www_bget?atr:18427561	Aminoacyl-tRNA biosynthesis
A0A072VS77	Methylenetetrahydrofolate reductase	25482865	Methylenetetrahydrofolate reductase OS=Medicago truncatula OX=3880 GN=25482865 PE=3 SV=1	0	117.208	30	16	90	16	595	66.9	6.02	257.6	0	1	4.61418e+07	3.8177e+07	4.11017e+07	3.54913e+07	4.08503e+07	3.93071e+07	3.51813e+07	3.67383e+07	3.07859e+07	3.33605e+07	3.18507e+07	3.21529e+07	4.47174e+07	4.76999e+07	4.43276e+07	4.25084e+07	3.65867e+07	3.66586e+07	3.57142e+07	4.05483e+07	3.93774e+07	3.63187e+07	3.71167e+07	3.25652e+07	3.48882e+07	3.47467e+07	3.55006e+07	4.73682e+07	5.01023e+07	4.73271e+07	GO:0006555, GO:0004489	atr:105420518||http://www.genome.jp/dbget-bin/www_bget?atr:105420518	One carbon pool by folate
A0A072V0U2	Putative alcohol dehydrogenase	25489766	Putative alcohol dehydrogenase OS=Medicago truncatula OX=3880 GN=25489766 PE=3 SV=1	0	116.929	45	13	74	5	380	41.1	6.4	200.76	11	1	4.56863e+07	4.48856e+07	4.94612e+07	3.64155e+07	3.90278e+07	3.73354e+07	3.92577e+07	3.90917e+07	4.04357e+07	3.97481e+07	4.01986e+07	4.09096e+07	3.79483e+07	4.06669e+07	3.85126e+07	5.17443e+07	4.314e+07	4.53435e+07	3.57652e+07	3.94925e+07	3.83641e+07	4.10618e+07	4.16253e+07	3.2622e+07	4.09397e+07	3.22919e+07	3.28021e+07	3.76426e+07	3.84502e+07	3.76673e+07	GO:0016491, GO:0008270	atr:18448318||http://www.genome.jp/dbget-bin/www_bget?atr:18448318	Tyrosine metabolism
G7JRA0	Tubulin beta chain	11437601	Tubulin beta chain OS=Medicago truncatula OX=3880 GN=11437601 PE=3 SV=1	0	116.884	36	15	88	1	449	50.6	4.86	259.51	0	1	206961	180534	175616	192371	206575	232097	221097	246189	196574	227502	212935	198458	217741	224052	213738	264906	198201	213016	190868	221870	220130	240780	254575	165099	241761	173697	169301	170041	179874	171441	GO:0005874, GO:0003924, GO:0005200, GO:0005525, GO:0007017	atr:18422898||http://www.genome.jp/dbget-bin/www_bget?atr:18422898	Phagosome
G7J6M7	Ubiquitinyl hydrolase 1	11443023	Ubiquitinyl hydrolase 1 OS=Medicago truncatula OX=3880 GN=11443023 PE=3 SV=2	0	115.973	20	24	115	10	1118	131.2	5.73	243.97	15	1	2.37478e+08	1.7854e+08	2.06755e+08	7.88913e+07	8.05865e+07	7.15415e+07	8.14072e+07	7.77592e+07	1.22935e+08	8.39336e+07	1.10975e+08	1.15705e+08	5.10811e+07	5.20004e+07	5.23008e+07	1.07601e+08	1.08954e+08	1.10725e+08	1.13388e+08	1.112e+08	1.17611e+08	1.24174e+08	1.20124e+08	1.16264e+08	1.22612e+08	1.12317e+08	1.13028e+08	9.76223e+07	9.9348e+07	9.73248e+07	GO:0006511, GO:0004843, GO:0016579, GO:0005515	atr:18421576||http://www.genome.jp/dbget-bin/www_bget?atr:18421576	---
Q2HT34	Fumarylacetoacetase	11411049	Fumarylacetoacetase OS=Medicago truncatula OX=3880 GN=11411049 PE=3 SV=1	0	115.951	30	10	69	10	421	46	6.15	259.3	0	1	5.09411e+07	4.36198e+07	5.22092e+07	2.12034e+07	2.3799e+07	1.98935e+07	1.92005e+07	1.89301e+07	2.03635e+07	1.86365e+07	2.07261e+07	2.0937e+07	2.57889e+07	2.64092e+07	2.58959e+07	4.85362e+07	4.16977e+07	4.78446e+07	2.18637e+07	2.43518e+07	2.09737e+07	1.97202e+07	1.96539e+07	2.19998e+07	1.96646e+07	2.22259e+07	2.17946e+07	2.22961e+07	2.28637e+07	2.26971e+07	GO:0003824, GO:0009072, GO:0004334	atr:18429746||http://www.genome.jp/dbget-bin/www_bget?atr:18429746	Tyrosine metabolism
B7FIV2	Aldo_ket_red domain-containing protein		Aldo_ket_red domain-containing protein OS=Medicago truncatula OX=3880 PE=2 SV=1	0	115.716	50	16	71	16	313	34.8	6.55	224.25	0	1	2.98368e+07	3.65477e+07	3.19752e+07	3.63912e+07	3.3047e+07	3.43782e+07	3.40606e+07	3.3447e+07	3.99684e+07	3.37937e+07	4.25846e+07	4.18446e+07	7.89534e+07	8.20771e+07	7.73413e+07	3.44764e+07	3.84519e+07	3.5349e+07	3.94072e+07	3.74289e+07	3.86841e+07	3.69743e+07	3.59063e+07	3.68361e+07	3.77873e+07	4.0652e+07	3.97714e+07	7.20879e+07	7.08838e+07	7.25695e+07	GO:0047834, GO:0016491	atr:18436290||http://www.genome.jp/dbget-bin/www_bget?atr:18436290	Pentose and glucuronate interconversions
A0A072UXN6	Clathrin heavy chain	25490931	Clathrin heavy chain OS=Medicago truncatula OX=3880 GN=25490931 PE=3 SV=1	0	115.715	11	21	90	2	1704	193	5.48	241.16	0	1	170102	161080	153231	176414	196144	203400	214846	190741	167626	222662	162933	176184	138717	137761	152623	218094	141850	131997	139400	189779	158032	213761	232338	147725	223070	141932	129666	114715	121923	124287	GO:0071439, GO:0006886, GO:0005515, GO:0030130, GO:0030132, GO:0005198, GO:0032051, GO:0016192	atr:18433494||http://www.genome.jp/dbget-bin/www_bget?atr:18433494	Endocytosis
A0A396JEX8	Putative UDP-glucose 4,6-dehydratase	MtrunA17_Chr2g0314601	Putative UDP-glucose 4,6-dehydratase OS=Medicago truncatula OX=3880 GN=MtrunA17_Chr2g0314601 PE=4 SV=1	0	115.402	32	21	63	12	670	75.3	6.68	157.29	11	1	3.405e+07	3.54844e+07	3.67929e+07	3.55927e+07	3.44441e+07	3.58062e+07	3.43508e+07	3.45553e+07	3.2103e+07	3.39047e+07	3.25252e+07	3.27185e+07	4.27702e+07	4.41827e+07	4.23041e+07	3.52998e+07	3.50477e+07	3.67061e+07	3.41117e+07	3.84324e+07	3.93688e+07	3.78119e+07	3.66224e+07	3.38596e+07	3.70364e+07	3.24858e+07	3.3134e+07	3.28112e+07	3.34177e+07	3.25164e+07	GO:0009225, GO:0008460	atr:18435387||http://www.genome.jp/dbget-bin/www_bget?atr:18435387	Amino sugar and nucleotide sugar metabolism
I3SK49	Plant basic secretory protein (BSP) family protein	25485381	Plant basic secretory protein (BSP) family protein OS=Medicago truncatula OX=3880 GN=25485381 PE=2 SV=1	0	115.188	47	10	178	10	224	25.4	7.58	522.53	0	1	3.74844e+08	4.20115e+08	4.83568e+08	1.7713e+08	1.63615e+08	1.34819e+08	1.31055e+08	1.22112e+08	1.37589e+08	1.22721e+08	1.46468e+08	1.41133e+08	1.11705e+08	1.15519e+08	1.16175e+08	3.76656e+08	4.18861e+08	4.87881e+08	1.68763e+08	1.5868e+08	1.38899e+08	1.30943e+08	1.1852e+08	1.44871e+08	1.27495e+08	1.49724e+08	1.42369e+08	9.94561e+07	1.01945e+08	1.04233e+08	---	atr:18430360||http://www.genome.jp/dbget-bin/www_bget?atr:18430360	---
A0A072VC11	Coatomer subunit beta'	25487934	Coatomer subunit beta' OS=Medicago truncatula OX=3880 GN=25487934 PE=3 SV=1	0	114.779	17	14	73	4	921	104	5.03	204.59	0	1	3.2059e+06	3.47162e+06	3.46581e+06	2.91813e+06	2.78272e+06	2.75815e+06	2.87853e+06	2.85027e+06	2.75321e+06	2.78453e+06	2.81716e+06	2.7363e+06	2.10444e+06	2.18126e+06	2.20457e+06	2.93317e+06	2.72944e+06	2.90683e+06	2.68658e+06	2.76114e+06	3.01686e+06	3.01379e+06	3.0699e+06	2.5203e+06	2.87396e+06	2.47671e+06	2.47175e+06	2.54405e+06	2.50358e+06	2.47106e+06	GO:0005515, GO:0006886, GO:0016192, GO:0030117, GO:0005198	atr:18434208||http://www.genome.jp/dbget-bin/www_bget?atr:18434208	---
B7FNA7	Uncharacterized protein (Fragment)		Uncharacterized protein (Fragment) OS=Medicago truncatula OX=3880 PE=2 SV=1	0	114.478	28	12	61	12	480	50.6	5.15	194.63	0	1	2.76281e+07	2.3996e+07	2.63917e+07	2.09238e+07	2.26186e+07	2.2428e+07	2.18792e+07	2.18207e+07	2.49074e+07	2.15751e+07	2.51725e+07	2.5196e+07	3.41183e+07	3.4676e+07	3.2969e+07	3.00958e+07	2.71691e+07	2.98958e+07	2.27142e+07	2.63922e+07	2.64633e+07	2.04277e+07	2.14159e+07	2.42692e+07	1.97132e+07	2.33633e+07	2.34355e+07	3.08292e+07	3.13096e+07	3.04375e+07	---	atr:18437073||http://www.genome.jp/dbget-bin/www_bget?atr:18437073	---
G7JGT0	NADP-dependent glyceraldehyde-3-phosphate dehydrogenase	11436321	NADP-dependent glyceraldehyde-3-phosphate dehydrogenase OS=Medicago truncatula OX=3880 GN=11436321 PE=3 SV=1	0	114.385	34	16	87	16	496	53	7.33	238.31	0	1	2.88735e+07	3.06661e+07	2.98719e+07	3.23843e+07	3.06299e+07	3.17106e+07	3.21392e+07	3.19267e+07	3.48314e+07	3.47499e+07	3.58331e+07	3.74854e+07	7.91888e+07	8.21336e+07	7.68029e+07	3.06793e+07	3.31172e+07	3.32002e+07	3.40755e+07	3.40571e+07	3.65579e+07	3.69931e+07	3.56282e+07	3.77223e+07	3.66115e+07	3.77537e+07	3.9153e+07	7.44843e+07	7.42328e+07	7.35667e+07	GO:0016620, GO:0016491	atr:18447011||http://www.genome.jp/dbget-bin/www_bget?atr:18447011	Pentose phosphate pathway
G7KXR2	Transaldolase	11406940	Transaldolase OS=Medicago truncatula OX=3880 GN=11406940 PE=3 SV=1	0	114.268	30	12	84	12	443	48.5	6.6	260.92	0	1	7.42764e+07	8.88585e+07	9.70511e+07	5.54432e+07	4.75348e+07	4.68825e+07	4.50106e+07	4.49744e+07	4.46775e+07	4.3941e+07	4.83786e+07	4.70698e+07	6.43714e+07	6.71439e+07	6.48172e+07	7.54896e+07	9.10705e+07	9.62245e+07	6.13742e+07	5.03404e+07	5.21423e+07	4.79248e+07	5.036e+07	5.03159e+07	4.72589e+07	5.24631e+07	5.15234e+07	6.23592e+07	6.3548e+07	6.30017e+07	GO:0005737, GO:0005975, GO:0006098, GO:0004801, GO:0003824	atr:18434316||http://www.genome.jp/dbget-bin/www_bget?atr:18434316	Pentose phosphate pathway
A0A072UUK4	Protein transporter Sec31	25492007	Protein transporter Sec31 OS=Medicago truncatula OX=3880 GN=25492007 PE=3 SV=1	0	114.022	18	17	79	17	1124	121.6	5.35	184.76	0	1	2.38832e+07	2.41771e+07	2.38178e+07	2.45778e+07	2.60956e+07	2.73104e+07	2.71194e+07	2.77732e+07	2.27746e+07	2.59114e+07	2.31261e+07	2.24043e+07	2.3505e+07	2.46994e+07	2.37694e+07	2.34332e+07	2.31515e+07	2.34022e+07	2.45796e+07	2.62746e+07	2.78404e+07	2.60721e+07	2.56395e+07	2.35186e+07	2.47287e+07	2.30446e+07	2.28665e+07	2.49445e+07	2.55159e+07	2.49846e+07	GO:0006888, GO:0005515	atr:18428304||http://www.genome.jp/dbget-bin/www_bget?atr:18428304	Protein processing in endoplasmic reticulum
G7I9L3	Elongation factor 1-alpha	11427994	Elongation factor 1-alpha OS=Medicago truncatula OX=3880 GN=11427994 PE=3 SV=2	0	114.016	32	13	186	2	448	49.4	9.06	516	0	1	2.19743e+06	1.43973e+06	1.6358e+06	1.40695e+06	2.0711e+06	1.92661e+06	2.00527e+06	2.26036e+06	1.01114e+06	2.0329e+06	999557	1.04702e+06	1.54322e+06	1.60218e+06	1.53265e+06	2.2041e+06	1.38566e+06	1.56081e+06	1.29708e+06	1.9828e+06	1.88081e+06	2.02639e+06	2.11525e+06	1.00607e+06	2.03416e+06	954650	990785	1.39142e+06	1.50326e+06	1.35755e+06	GO:0005525, GO:0003924, GO:0003746, GO:0006414	atr:18448544||http://www.genome.jp/dbget-bin/www_bget?atr:18448544	RNA transport
Q2MJ09	Coumarate 4-hydroxylase	CYP73A3	Coumarate 4-hydroxylase OS=Medicago truncatula OX=3880 GN=CYP73A3 PE=2 SV=1	0	114.015	29	13	70	13	506	58.1	9.04	219.28	0	1	2.44103e+07	2.29797e+07	2.42017e+07	2.12263e+07	2.4797e+07	2.44195e+07	2.46876e+07	2.60776e+07	2.16285e+07	2.51478e+07	2.20558e+07	2.1516e+07	2.29775e+07	2.00014e+07	2.14217e+07	2.39267e+07	2.45207e+07	2.45195e+07	2.51885e+07	2.50696e+07	2.56909e+07	2.59844e+07	2.61752e+07	2.71885e+07	2.5594e+07	2.62181e+07	2.44805e+07	2.35819e+07	2.35055e+07	2.31711e+07	GO:0005506, GO:0016705, GO:0004497, GO:0020037	atr:18432337||http://www.genome.jp/dbget-bin/www_bget?atr:18432337	Stilbenoid, diarylheptanoid and gingerol biosynthesis
A0A072VR75	Cobalamin biosynthesis protein	25485730	Cobalamin biosynthesis protein OS=Medicago truncatula OX=3880 GN=25485730 PE=3 SV=1	0	113.92	30	12	63	12	449	49.9	6.27	207.03	0	1	2.51267e+07	2.51467e+07	2.49708e+07	2.84183e+07	2.98123e+07	3.02737e+07	2.9612e+07	3.09355e+07	2.38385e+07	2.88415e+07	2.48847e+07	2.5376e+07	2.61854e+07	2.42589e+07	2.51534e+07	2.20404e+07	2.38374e+07	2.24491e+07	2.92418e+07	2.81573e+07	2.94415e+07	2.79277e+07	2.79662e+07	2.67776e+07	2.79365e+07	2.64992e+07	2.68013e+07	3.17569e+07	2.68343e+07	2.97396e+07	---	atr:18442552||http://www.genome.jp/dbget-bin/www_bget?atr:18442552	---
G7K4V4	Neutral ceramidase	11437412	Neutral ceramidase OS=Medicago truncatula OX=3880 GN=11437412 PE=3 SV=2	0	113.714	21	15	92	15	778	85.6	7.78	253	0	1	6.48562e+07	5.1382e+07	5.79997e+07	3.31158e+07	3.57641e+07	3.30947e+07	3.43004e+07	3.35506e+07	4.36102e+07	3.57421e+07	4.1439e+07	4.19572e+07	3.52911e+07	3.07365e+07	3.39407e+07	7.77666e+07	5.28902e+07	6.06428e+07	3.21983e+07	3.85288e+07	3.53385e+07	3.68191e+07	3.69068e+07	4.15703e+07	3.81214e+07	3.91251e+07	3.89139e+07	2.65371e+07	2.70158e+07	2.66929e+07	GO:0046514, GO:0017040	atr:18437794||http://www.genome.jp/dbget-bin/www_bget?atr:18437794	Sphingolipid metabolism
A0A072VRF3	Arginyl-tRNA synthetase	25485317	Arginyl-tRNA synthetase OS=Medicago truncatula OX=3880 GN=25485317 PE=3 SV=1	0	113.099	25	14	78	7	596	67.9	6.57	218.67	10	1	2.2338e+07	2.64254e+07	2.58145e+07	2.82741e+07	2.44979e+07	2.62842e+07	2.48422e+07	2.50447e+07	2.52403e+07	2.4987e+07	2.59494e+07	2.57978e+07	2.73147e+07	2.82598e+07	2.76578e+07	2.22483e+07	2.35833e+07	2.35342e+07	2.68409e+07	2.43244e+07	2.66854e+07	2.51284e+07	2.4835e+07	2.73463e+07	2.45019e+07	2.73409e+07	2.70656e+07	2.58281e+07	2.6528e+07	2.61135e+07	GO:0005737, GO:0006418, GO:0005524, GO:0004814, GO:0006420, GO:0004812, GO:0000166	atr:18443485||http://www.genome.jp/dbget-bin/www_bget?atr:18443485	Aminoacyl-tRNA biosynthesis
A0A072TGQ9	Alpha-1,4 glucan phosphorylase	MTR_0288s0040	Alpha-1,4 glucan phosphorylase OS=Medicago truncatula OX=3880 GN=MTR_0288s0040 PE=3 SV=1	0	112.967	21	17	63	1	914	103.3	5.19	196.65	0	1	1.49242e+06	1.31481e+06	1.26308e+06	1.43851e+06	1.55355e+06	1.5403e+06	1.67439e+06	1.64957e+06	1.28331e+06	1.65319e+06	1.33491e+06	1.3343e+06	1.2411e+06	1.35352e+06	1.25731e+06	1.49567e+06	1.30404e+06	1.30822e+06	1.42039e+06	1.4414e+06	1.51108e+06	1.64016e+06	1.65818e+06	1.34908e+06	1.67709e+06	1.34924e+06	1.40752e+06	1.18196e+06	1.15928e+06	1.19875e+06	GO:0005975, GO:0008184	atr:18427974||http://www.genome.jp/dbget-bin/www_bget?atr:18427974	Starch and sucrose metabolism
B7FL29	40S ribosomal protein S4	11407262	40S ribosomal protein S4 OS=Medicago truncatula OX=3880 GN=11407262 PE=2 SV=1	0	112.795	45	11	105	3	265	29.9	10.23	331.34	10	1	6.54191e+07	5.81171e+07	5.89801e+07	6.17881e+07	6.79734e+07	7.0111e+07	6.97906e+07	6.80389e+07	5.13874e+07	6.40101e+07	5.29741e+07	5.40705e+07	9.72043e+07	1.02438e+08	9.51382e+07	6.58881e+07	5.78741e+07	5.74314e+07	6.31609e+07	7.00752e+07	6.98964e+07	6.59811e+07	6.70135e+07	5.36577e+07	6.39144e+07	5.1657e+07	5.31981e+07	8.64399e+07	8.42296e+07	8.2551e+07	GO:0003735, GO:0005840, GO:0006412, GO:0003723	atr:18441535||http://www.genome.jp/dbget-bin/www_bget?atr:18441535	Ribosome
A0A072V2Z0	ER membrane protein complex subunit 1	25490115	ER membrane protein complex subunit 1 OS=Medicago truncatula OX=3880 GN=25490115 PE=3 SV=1	0	112.64	22	22	80	22	983	110.2	6.79	217.56	0	1	3.27518e+07	2.83096e+07	3.03053e+07	2.67843e+07	3.10134e+07	3.03383e+07	3.34832e+07	3.42972e+07	2.77687e+07	3.28644e+07	2.81856e+07	2.72724e+07	2.22332e+07	2.35707e+07	2.24529e+07	3.42699e+07	2.85897e+07	3.04725e+07	2.63325e+07	3.13447e+07	3.09976e+07	3.45112e+07	3.56866e+07	2.9784e+07	3.52504e+07	2.76403e+07	2.8223e+07	2.03288e+07	2.08134e+07	2.06236e+07	GO:0005515, GO:0072546	atr:18426689||http://www.genome.jp/dbget-bin/www_bget?atr:18426689	---
G7KHI5	Isocitrate dehydrogenase [NADP]	11419675	Isocitrate dehydrogenase [NADP] OS=Medicago truncatula OX=3880 GN=11419675 PE=3 SV=1	0	112.216	31	14	89	5	482	54.5	7.39	224.15	1	1	4.11568e+06	3.76844e+06	3.88451e+06	4.15616e+06	4.35396e+06	4.62525e+06	4.69203e+06	5.15186e+06	4.04622e+06	5.16128e+06	4.16713e+06	4.02083e+06	5.38109e+06	5.51912e+06	5.21642e+06	3.58915e+06	3.20811e+06	3.22811e+06	3.12161e+06	3.45305e+06	3.48306e+06	3.83859e+06	3.72006e+06	6.72762e+06	3.96712e+06	6.44519e+06	6.35885e+06	5.3144e+06	5.38396e+06	5.12703e+06	GO:0016616, GO:0006102, GO:0000287, GO:0051287, GO:0004450	atr:18430862||http://www.genome.jp/dbget-bin/www_bget?atr:18430862	Peroxisome
G7L865	Lactoylglutathione lyase	11416731	Lactoylglutathione lyase OS=Medicago truncatula OX=3880 GN=11416731 PE=3 SV=1	0	112.122	34	11	105	9	347	38.8	7.02	326.81	3	1	1.493e+08	1.32508e+08	1.58158e+08	5.58718e+07	6.27228e+07	5.30477e+07	4.9088e+07	4.78654e+07	4.62167e+07	4.70055e+07	4.96944e+07	4.74044e+07	6.19916e+07	5.69872e+07	6.02542e+07	1.46833e+08	1.31666e+08	1.62315e+08	5.30189e+07	6.33581e+07	5.40007e+07	4.77358e+07	4.76816e+07	4.98152e+07	4.67873e+07	5.15126e+07	4.94692e+07	5.80013e+07	5.77611e+07	5.94581e+07	GO:0046872, GO:0004462	atr:18426718||http://www.genome.jp/dbget-bin/www_bget?atr:18426718	Metabolic pathways
A0A396IP41	Putative proteasome activator Blm10, mid region	MtrunA17_Chr3g0103331	Putative proteasome activator Blm10, mid region OS=Medicago truncatula OX=3880 GN=MtrunA17_Chr3g0103331 PE=3 SV=1	0	112.099	14	25	70	25	1816	203	7.11	183.22	0	1	2.63687e+07	2.86195e+07	2.79162e+07	3.07254e+07	2.85127e+07	2.99614e+07	2.93218e+07	2.93489e+07	2.98458e+07	2.84373e+07	2.99653e+07	2.93113e+07	2.68456e+07	2.76822e+07	2.7422e+07	2.54773e+07	2.64561e+07	2.72117e+07	2.83646e+07	2.79256e+07	2.89827e+07	2.75259e+07	2.81501e+07	2.86807e+07	2.64024e+07	2.69539e+07	2.74142e+07	2.70277e+07	2.74019e+07	2.71503e+07	GO:0070628, GO:0016504, GO:0070577	atr:18447449||http://www.genome.jp/dbget-bin/www_bget?atr:18447449	Proteasome
G7J8C0	Aminopeptidase	11423248	Aminopeptidase OS=Medicago truncatula OX=3880 GN=11423248 PE=3 SV=1	0	111.888	21	18	56	18	876	98.9	5.69	153.4	0	1	3.36115e+07	3.16335e+07	3.27407e+07	3.33007e+07	3.33396e+07	3.48843e+07	3.37363e+07	3.43893e+07	3.48169e+07	3.32809e+07	3.53456e+07	3.45634e+07	4.06808e+07	4.26359e+07	4.04586e+07	3.13228e+07	3.20733e+07	3.20214e+07	3.19965e+07	3.22139e+07	3.32892e+07	3.40346e+07	3.38037e+07	3.83912e+07	3.39313e+07	3.80786e+07	3.74194e+07	4.00283e+07	4.07263e+07	3.90926e+07	GO:0008237, GO:0006508, GO:0008270	atr:18435092||http://www.genome.jp/dbget-bin/www_bget?atr:18435092	---
I3T307	S-(hydroxymethyl)glutathione dehydrogenase		S-(hydroxymethyl)glutathione dehydrogenase OS=Medicago truncatula OX=3880 PE=2 SV=1	0	111.845	30	9	76	9	380	40.7	6.58	208.71	0	1	3.51711e+07	2.94426e+07	3.01761e+07	3.2382e+07	3.82024e+07	3.87795e+07	3.6411e+07	3.72944e+07	3.71957e+07	3.5652e+07	3.95998e+07	3.56209e+07	3.20955e+07	3.06479e+07	3.18019e+07	3.20828e+07	3.04839e+07	2.91692e+07	3.27929e+07	3.36244e+07	3.55379e+07	3.46102e+07	3.46407e+07	5.58138e+07	3.32434e+07	7.53576e+07	3.57883e+07	3.18767e+07	2.79331e+07	3.27695e+07	GO:0051903, GO:0008270, GO:0016491, GO:0006069	atr:18426021||http://www.genome.jp/dbget-bin/www_bget?atr:18426021	Tyrosine metabolism
A0A072TVX1	Carboxypeptidase	25497517	Carboxypeptidase OS=Medicago truncatula OX=3880 GN=25497517 PE=3 SV=1	0	111.334	27	12	88	12	468	53.1	8.57	252.93	0	1	1.22677e+08	8.80524e+07	1.03626e+08	6.0205e+07	7.29124e+07	6.64704e+07	6.54995e+07	6.64695e+07	6.35187e+07	6.61603e+07	6.1094e+07	6.05647e+07	3.73841e+07	3.8245e+07	3.75752e+07	1.40911e+08	1.01443e+08	1.15457e+08	6.55693e+07	7.78755e+07	6.99743e+07	6.6729e+07	6.64052e+07	7.38481e+07	6.56733e+07	6.9371e+07	6.93006e+07	3.29208e+07	3.33926e+07	3.43519e+07	GO:0006508, GO:0004185	atr:18435737||http://www.genome.jp/dbget-bin/www_bget?atr:18435737	---
A0A072UM25	Argonaute protein 1A	25497351	Argonaute protein 1A OS=Medicago truncatula OX=3880 GN=25497351 PE=3 SV=1	0	111.161	22	23	123	21	1115	122.7	9.23	329.03	2	1	5.66177e+07	5.74538e+07	5.7239e+07	6.16194e+07	6.14664e+07	6.2749e+07	6.71403e+07	6.82922e+07	6.5792e+07	6.6333e+07	6.45392e+07	6.52712e+07	7.38403e+07	7.67714e+07	7.32043e+07	5.6871e+07	5.78383e+07	5.65665e+07	6.51176e+07	6.61184e+07	6.71216e+07	7.24648e+07	7.332e+07	6.27645e+07	7.07343e+07	6.32592e+07	6.33168e+07	7.04539e+07	7.23203e+07	7.077e+07	GO:0003676, GO:0005515	atr:18445387||http://www.genome.jp/dbget-bin/www_bget?atr:18445387	---
G7JK09	Polyadenylate-binding protein	11445084	Polyadenylate-binding protein OS=Medicago truncatula OX=3880 GN=11445084 PE=3 SV=1	0	111.101	25	16	66	13	654	71	8.25	176.49	3	1	1.79766e+07	1.79041e+07	1.73571e+07	1.97262e+07	1.99475e+07	2.04127e+07	1.97647e+07	2.04732e+07	2.15042e+07	2.04441e+07	2.18358e+07	2.21044e+07	3.35483e+07	3.42636e+07	3.27988e+07	1.88434e+07	1.77427e+07	1.77115e+07	2.07537e+07	2.03785e+07	2.2105e+07	2.06326e+07	2.06638e+07	2.07189e+07	2.07904e+07	2.11762e+07	2.154e+07	3.28317e+07	3.2474e+07	3.22416e+07	GO:0003723, GO:0003676	atr:18444929||http://www.genome.jp/dbget-bin/www_bget?atr:18444929	RNA degradation
G7K975	Putative nitrite reductase [NAD(P)H] small subunit, NirD	11442362	Putative nitrite reductase [NAD(P)H] small subunit, NirD OS=Medicago truncatula OX=3880 GN=11442362 PE=4 SV=1	0	111.071	39	10	80	10	272	30	8.13	250	0	1	2.57626e+07	2.80836e+07	2.81971e+07	3.36079e+07	3.37077e+07	3.42682e+07	3.2804e+07	3.1987e+07	3.73295e+07	3.19875e+07	3.74471e+07	3.68371e+07	3.8808e+07	4.05225e+07	3.83166e+07	2.94037e+07	3.05215e+07	2.98799e+07	3.57632e+07	3.32458e+07	3.59459e+07	3.39676e+07	3.4035e+07	3.93667e+07	3.35457e+07	3.81156e+07	3.62293e+07	4.18329e+07	3.84838e+07	4.10663e+07	GO:0008942, GO:0051537	atr:18427695||http://www.genome.jp/dbget-bin/www_bget?atr:18427695	---
A0A072TMC9	Starch synthase, chloroplastic/amyloplastic	25500617	Starch synthase, chloroplastic/amyloplastic OS=Medicago truncatula OX=3880 GN=25500617 PE=3 SV=1	0	110.961	29	15	67	12	616	67.8	8.38	232.9	3	1	3.12262e+07	2.78005e+07	2.94185e+07	2.74122e+07	3.12316e+07	3.06724e+07	3.31158e+07	3.33136e+07	2.7321e+07	3.29971e+07	2.57812e+07	2.69153e+07	2.81939e+07	2.93508e+07	2.79749e+07	2.99741e+07	2.80384e+07	2.9222e+07	2.98182e+07	3.29074e+07	3.48084e+07	3.42865e+07	3.25186e+07	3.25545e+07	3.33276e+07	2.93887e+07	3.00578e+07	2.36649e+07	2.31031e+07	2.42055e+07	GO:0004373, GO:0016757	atr:18428468||http://www.genome.jp/dbget-bin/www_bget?atr:18428468	Starch and sucrose metabolism
G7JAI2	ATP synthase, F0 subunit B	11432459	ATP synthase, F0 subunit B OS=Medicago truncatula OX=3880 GN=11432459 PE=2 SV=1	0	110.956	35	8	61	8	209	23	5.8	198.03	0	1	8.15304e+06	7.90822e+06	7.37111e+06	9.52505e+06	7.95589e+06	8.07185e+06	7.86835e+06	8.28198e+06	7.26166e+06	7.63847e+06	8.24078e+06	8.55095e+06	2.3305e+07	2.45333e+07	2.23997e+07	5.49771e+06	5.31271e+06	5.00475e+06	6.07475e+06	6.50556e+06	6.82964e+06	6.53358e+06	6.62065e+06	5.69348e+06	6.42966e+06	6.43106e+06	6.7459e+06	2.50363e+07	2.56941e+07	2.44904e+07	GO:0015986, GO:0045263, GO:0015078	atr:18446325||http://www.genome.jp/dbget-bin/www_bget?atr:18446325	Photosynthesis
G7K2J4	Porin/voltage-dependent anion-selective channel protein	11421836	Porin/voltage-dependent anion-selective channel protein OS=Medicago truncatula OX=3880 GN=11421836 PE=2 SV=1	0	110.906	44	14	82	11	276	29.5	9.41	240.48	4	1	6.21805e+07	5.64461e+07	5.95373e+07	6.00131e+07	5.35445e+07	5.50706e+07	4.80937e+07	4.89484e+07	3.83275e+07	4.68454e+07	4.17802e+07	4.27327e+07	9.43019e+07	9.52361e+07	9.30498e+07	5.85885e+07	5.78572e+07	6.14128e+07	5.26245e+07	5.77201e+07	5.6959e+07	5.47917e+07	5.61687e+07	4.31163e+07	5.50002e+07	4.57126e+07	4.52367e+07	9.21588e+07	9.30603e+07	9.14288e+07	GO:0098656, GO:0005741, GO:0008308, GO:0055085	atr:18430877||http://www.genome.jp/dbget-bin/www_bget?atr:18430877	---
I3T3C6	LRRNT_2 domain-containing protein		LRRNT_2 domain-containing protein OS=Medicago truncatula OX=3880 PE=2 SV=1	0	110.614	33	12	84	12	425	47.1	8.56	265.47	0	1	2.58477e+08	1.9532e+08	2.18857e+08	1.36414e+08	1.54543e+08	1.42979e+08	1.40273e+08	1.42866e+08	1.65347e+08	1.44686e+08	1.56393e+08	1.68987e+08	1.12618e+08	1.13368e+08	1.09017e+08	2.77257e+08	2.05085e+08	2.29392e+08	1.37123e+08	1.66503e+08	1.55061e+08	1.52227e+08	1.46721e+08	2.26839e+08	1.57427e+08	2.02619e+08	2.07718e+08	8.37578e+07	8.398e+07	8.45315e+07	GO:0005515	atr:18423918||http://www.genome.jp/dbget-bin/www_bget?atr:18423918	---
G7KEN6	Heat shock protein 81-2	11419641	Heat shock protein 81-2 OS=Medicago truncatula OX=3880 GN=11419641 PE=3 SV=1	0	110.446	16	16	105	10	792	90	5.48	290.47	0	1	9.28465e+06	1.06791e+07	1.03875e+07	1.17489e+07	1.0902e+07	1.17208e+07	1.07447e+07	1.04652e+07	1.22928e+07	1.05295e+07	1.21151e+07	1.25208e+07	1.04884e+07	1.08527e+07	1.06298e+07	8.88163e+06	9.4435e+06	9.52465e+06	1.1137e+07	1.06707e+07	1.16366e+07	1.07364e+07	1.07313e+07	1.27245e+07	1.05854e+07	1.20398e+07	1.23921e+07	9.744e+06	1.03408e+07	9.88919e+06	GO:0006457, GO:0051082, GO:0005524, GO:0016887	atr:18438811||http://www.genome.jp/dbget-bin/www_bget?atr:18438811	Protein processing in endoplasmic reticulum
W8CY80	ATP synthase subunit b, chloroplastic	atpF	ATP synthase subunit b, chloroplastic OS=Medicago truncatula f. tricycla OX=304102 GN=atpF PE=3 SV=1	0	110.388	38	11	144	11	184	21.1	7.3	400.79	0	1	4.39828e+07	5.09987e+07	4.83628e+07	6.10113e+07	5.77255e+07	6.29492e+07	6.56562e+07	6.44988e+07	5.26506e+07	6.32251e+07	5.77937e+07	5.81825e+07	1.86729e+08	1.9271e+08	1.84276e+08	4.62124e+07	4.93843e+07	4.89946e+07	6.24871e+07	6.19335e+07	6.55068e+07	6.27836e+07	6.33007e+07	5.91941e+07	6.20901e+07	6.26748e+07	6.45015e+07	1.88016e+08	1.7491e+08	1.77234e+08	GO:0015986, GO:0045263, GO:0015078	atr:2546499|atpF, AmtrCp008|http://www.genome.jp/dbget-bin/www_bget?atr:2546499	Photosynthesis
A0A072VMP1	ATPase, AAA-type, CDC48 protein	MTR_2g095320	ATPase, AAA-type, CDC48 protein OS=Medicago truncatula OX=3880 GN=MTR_2g095320 PE=4 SV=1	0	110.255	22	14	86	3	724	80.2	5.2	255.36	0	1	919760	877399	833421	896771	828697	878657	1.02071e+06	945753	1.2099e+06	982442	1.2031e+06	1.21449e+06	969432	999083	999388	722245	699784	753858	847067	819598	880106	906559	828395	720056	848022	766016	791116	1.26626e+06	1.27084e+06	1.27326e+06	GO:0016887, GO:0005524	atr:18426439||http://www.genome.jp/dbget-bin/www_bget?atr:18426439	Protein processing in endoplasmic reticulum
B1NY79	Cold-acclimation specific protein 15	11438901	Cold-acclimation specific protein 15 OS=Medicago truncatula OX=3880 GN=11438901 PE=4 SV=1	0	110.228	68	10	100	10	121	13.1	6.77	269.88	0	1	1.44058e+07	1.60621e+07	1.54192e+07	1.41324e+07	1.21937e+07	1.31148e+07	1.01e+07	1.08179e+07	1.1497e+07	1.07567e+07	1.34348e+07	1.35993e+07	4.62713e+07	4.92043e+07	4.87639e+07	1.37577e+07	1.10428e+07	1.0961e+07	1.2306e+07	1.35535e+07	1.39396e+07	1.3039e+07	1.45032e+07	1.17951e+07	1.45652e+07	1.29474e+07	1.35395e+07	3.36069e+07	3.44769e+07	3.25602e+07	GO:0046872	None	---
A0A072URD6	Plasma membrane ATPase	25493803	Plasma membrane ATPase OS=Medicago truncatula OX=3880 GN=25493803 PE=3 SV=1	0	110.15	21	19	89	6	958	105.5	6.6	240.84	4	1	3.23211e+06	4.08335e+06	3.63104e+06	4.71272e+06	4.00341e+06	4.29939e+06	3.95037e+06	4.35377e+06	4.93349e+06	4.11662e+06	4.94442e+06	4.96313e+06	4.70695e+06	4.74665e+06	4.54833e+06	3.69291e+06	3.69432e+06	3.45337e+06	3.84746e+06	4.07706e+06	4.28001e+06	4.48723e+06	4.25549e+06	4.48699e+06	4.41998e+06	4.26341e+06	4.23229e+06	3.96052e+06	4.16594e+06	3.96687e+06	GO:0140603, GO:0016021, GO:0120029, GO:0005215, GO:0008553, GO:0005524, GO:0000166	atr:18429448||http://www.genome.jp/dbget-bin/www_bget?atr:18429448	Oxidative phosphorylation
B7FLG2	Pyruvate kinase		Pyruvate kinase OS=Medicago truncatula OX=3880 PE=2 SV=1	0	110.084	34	17	61	7	500	53.9	7.8	173.84	11	1	2.99503e+07	6.06636e+07	4.3043e+07	4.39337e+07	3.54484e+07	3.47399e+07	3.56915e+07	3.56835e+07	2.99496e+07	3.51407e+07	3.53222e+07	3.31716e+07	5.54295e+07	5.77526e+07	5.65096e+07	2.89662e+07	3.52878e+07	3.11627e+07	3.39676e+07	3.21607e+07	3.3621e+07	3.38136e+07	3.51271e+07	3.02592e+07	3.25638e+07	3.16493e+07	3.2468e+07	5.49824e+07	5.46402e+07	5.3293e+07	GO:0030955, GO:0003824, GO:0006096, GO:0000287, GO:0004743	atr:18425196||http://www.genome.jp/dbget-bin/www_bget?atr:18425196	Purine metabolism
A0A072UYZ3	Vesicle-fusing ATPase	MTR_4g088885	Vesicle-fusing ATPase OS=Medicago truncatula OX=3880 GN=MTR_4g088885 PE=3 SV=1	0	110.083	21	15	70	15	752	82.7	6.13	186.58	0	1	2.47029e+07	2.71358e+07	2.67072e+07	2.72567e+07	2.60967e+07	2.74177e+07	2.65491e+07	2.60492e+07	2.61285e+07	2.51592e+07	2.66184e+07	2.66063e+07	2.70752e+07	2.86375e+07	2.76862e+07	2.57945e+07	2.76058e+07	2.80889e+07	2.80176e+07	2.60877e+07	2.76319e+07	2.63169e+07	2.5804e+07	2.93896e+07	2.56371e+07	2.86974e+07	2.84185e+07	2.31312e+07	2.35864e+07	2.35206e+07	GO:0016887, GO:0005524, GO:0035494	atr:18448924||http://www.genome.jp/dbget-bin/www_bget?atr:18448924	---
A2Q5W0	Tubulin alpha chain	aTUB	Tubulin alpha chain OS=Medicago truncatula OX=3880 GN=aTUB PE=3 SV=1	0	110.048	34	13	113	2	451	49.8	5.1	295.92	0	1	2.75247e+06	2.75387e+06	2.78408e+06	2.53067e+06	2.98508e+06	3.34059e+06	2.64322e+06	3.09034e+06	2.20406e+06	2.60833e+06	2.09431e+06	2.44059e+06	5.56775e+06	5.70489e+06	5.00779e+06	2.57074e+06	3.03079e+06	2.8653e+06	2.69768e+06	3.17299e+06	3.59475e+06	2.74775e+06	2.95893e+06	3.57018e+06	2.73814e+06	3.13348e+06	3.50855e+06	4.95781e+06	4.9502e+06	4.61761e+06	GO:0003924, GO:0005874, GO:0005525, GO:0005200, GO:0007017	atr:18448826||http://www.genome.jp/dbget-bin/www_bget?atr:18448826	Phagosome
G7INT9	Chlorophyll a-b binding protein, chloroplastic	11430346	Chlorophyll a-b binding protein, chloroplastic OS=Medicago truncatula OX=3880 GN=11430346 PE=3 SV=1	0	109.989	23	4	112	4	261	27.7	6.6	416.15	0	1	7.0791e+07	8.29032e+07	8.38213e+07	8.82305e+07	7.39474e+07	7.88058e+07	7.78957e+07	7.58344e+07	9.86505e+07	8.3531e+07	9.47648e+07	9.34208e+07	6.21187e+07	6.30713e+07	6.20477e+07	8.11033e+07	8.42766e+07	8.64597e+07	9.64929e+07	8.17621e+07	8.62503e+07	8.32961e+07	8.2809e+07	1.05289e+08	8.25381e+07	1.00558e+08	1.00496e+08	6.08351e+07	6.01142e+07	6.05938e+07	GO:0016020, GO:0009765	atr:18423121||http://www.genome.jp/dbget-bin/www_bget?atr:18423121	Photosynthesis - antenna proteins
A0A072TPE4	26S proteasome non-ATPase regulatory subunit 6	MTR_8g046560	26S proteasome non-ATPase regulatory subunit 6 OS=Medicago truncatula OX=3880 GN=MTR_8g046560 PE=3 SV=1	0	109.754	19	11	171	1	523	57.7	5.95	465.58	2	1	2.39491e+07	2.12216e+07	2.2965e+07	1.84055e+07	1.98816e+07	2.07313e+07	1.94447e+07	1.78029e+07	1.28999e+07	1.86336e+07	1.41587e+07	1.51305e+07	2.73055e+07	2.89302e+07	2.65903e+07	2.21421e+07	1.87498e+07	2.05321e+07	1.64688e+07	1.99226e+07	2.06586e+07	1.70865e+07	1.78093e+07	9.70915e+06	1.70366e+07	1.11303e+07	1.13548e+07	2.70545e+07	2.80205e+07	2.54777e+07	GO:0051287, GO:0016620	atr:18433636||http://www.genome.jp/dbget-bin/www_bget?atr:18433636	Proteasome
G7ILW0	Serine hydroxymethyltransferase	11445860	Serine hydroxymethyltransferase OS=Medicago truncatula OX=3880 GN=11445860 PE=1 SV=1	0	109.63	34	14	60	14	533	57.6	7.47	185.47	0	1	3.71765e+07	4.1223e+07	4.00607e+07	4.33484e+07	4.14395e+07	4.27737e+07	3.97655e+07	3.95739e+07	3.37529e+07	3.91729e+07	3.50279e+07	3.4238e+07	3.85314e+07	3.90356e+07	3.93434e+07	3.98873e+07	4.12413e+07	4.01721e+07	4.35797e+07	4.37523e+07	4.4762e+07	4.30917e+07	4.38117e+07	3.26478e+07	4.17607e+07	3.41547e+07	3.31091e+07	3.48804e+07	3.5168e+07	3.49878e+07	GO:0019264, GO:0004372, GO:0003824, GO:0030170, GO:0035999	atr:18441154||http://www.genome.jp/dbget-bin/www_bget?atr:18441154	Cyanoamino acid metabolism
G7LH36	Aspartokinase	11410334	Aspartokinase OS=Medicago truncatula OX=3880 GN=11410334 PE=3 SV=2	0	109.569	19	19	85	14	916	100.5	7.4	222.91	5	1	4.91641e+07	5.16845e+07	5.07237e+07	5.61607e+07	5.62369e+07	5.9825e+07	5.86229e+07	5.70413e+07	4.16966e+07	5.52946e+07	4.38844e+07	4.28766e+07	6.46402e+07	6.69728e+07	6.41348e+07	5.31233e+07	5.35573e+07	5.30491e+07	5.6935e+07	6.08765e+07	6.19532e+07	6.00345e+07	6.07841e+07	4.11368e+07	5.90883e+07	4.32978e+07	4.2169e+07	5.92234e+07	6.07342e+07	5.8673e+07	GO:0009067, GO:0006520, GO:0016491, GO:0008652, GO:0004072, GO:0050661, GO:0004412	atr:18429456||http://www.genome.jp/dbget-bin/www_bget?atr:18429456	Cysteine and methionine metabolism
A0A072VQ38	Ferredoxin reductase-like NAD(P) binding domain protein	11445499	Ferredoxin reductase-like NAD(P) binding domain protein OS=Medicago truncatula OX=3880 GN=11445499 PE=4 SV=1	0	109.475	30	8	48	8	287	31.4	8.27	168.08	0	1	2.50006e+07	2.43182e+07	2.50953e+07	2.58345e+07	2.74225e+07	2.76967e+07	2.56106e+07	2.55524e+07	2.67579e+07	2.43995e+07	2.65279e+07	2.66421e+07	2.92062e+07	2.89332e+07	2.95158e+07	2.37717e+07	2.29832e+07	2.38585e+07	2.48838e+07	2.59993e+07	2.70652e+07	2.41291e+07	2.42996e+07	2.19711e+07	2.37734e+07	2.20258e+07	2.24714e+07	3.23139e+07	2.78856e+07	3.05651e+07	GO:0016491	atr:18433795||http://www.genome.jp/dbget-bin/www_bget?atr:18433795	---
A0A072V6Z3	DEAD-box ATP-dependent RNA helicase	25488222	DEAD-box ATP-dependent RNA helicase OS=Medicago truncatula OX=3880 GN=25488222 PE=4 SV=1	0	109.456	36	16	65	14	406	45.9	6.37	193.1	0	1	4.26464e+07	3.97242e+07	4.13192e+07	4.03251e+07	4.29439e+07	4.39329e+07	4.00297e+07	4.30666e+07	3.5694e+07	4.01754e+07	3.75672e+07	3.48193e+07	4.20914e+07	4.41419e+07	4.29551e+07	4.59751e+07	4.05365e+07	4.29142e+07	3.99378e+07	4.47165e+07	4.34778e+07	4.35928e+07	4.51591e+07	3.57203e+07	4.30769e+07	3.55036e+07	3.5311e+07	3.26921e+07	3.35117e+07	3.32536e+07	GO:0003676, GO:0003724, GO:0005524	atr:18437609||http://www.genome.jp/dbget-bin/www_bget?atr:18437609	mRNA surveillance pathway
G7L831	CCT-alpha	11418019	CCT-alpha OS=Medicago truncatula OX=3880 GN=11418019 PE=3 SV=1	0	109.097	34	17	90	17	544	58.8	6.16	204.24	0	1	3.84868e+07	3.74754e+07	3.75973e+07	3.89704e+07	3.97631e+07	3.96608e+07	4.08306e+07	4.14893e+07	4.39635e+07	4.19089e+07	4.22954e+07	4.33217e+07	4.05143e+07	4.21368e+07	4.10829e+07	4.24831e+07	4.1663e+07	4.24201e+07	4.03133e+07	4.32334e+07	4.34504e+07	4.54715e+07	4.53921e+07	4.40847e+07	4.45629e+07	4.3285e+07	4.32656e+07	3.84472e+07	3.89062e+07	3.84431e+07	GO:0016887, GO:0005524, GO:0051082, GO:0006457	atr:18428834||http://www.genome.jp/dbget-bin/www_bget?atr:18428834	---
A0A072TJH7	Photosystem II protein D1	MTR_0002s0380	Photosystem II protein D1 OS=Medicago truncatula OX=3880 GN=MTR_0002s0380 PE=3 SV=1	0	109.071	21	6	297	1	353	38.9	5.36	853.51	0	1	337895	309746	263770	356680	403611	322145	547032	515910	332112	526705	359232	329464	265293	273593	254963	363582	259537	218559	283265	554253	441821	594020	602145	313159	586414	303337	294652	217398	229523	226021	GO:0019684, GO:0009055, GO:0009772, GO:0045156	atr:2546591|psbA, AmtrCp001|http://www.genome.jp/dbget-bin/www_bget?atr:2546591	Photosynthesis
A0A072TYE4	Putative tripeptidyl-peptidase II	25500620	Putative tripeptidyl-peptidase II OS=Medicago truncatula OX=3880 GN=25500620 PE=3 SV=1	0	107.447	14	8	74	7	762	82.4	7.21	274.19	2	1	3.51179e+07	3.1197e+07	3.43225e+07	2.33518e+07	2.32417e+07	2.21507e+07	2.1629e+07	2.11304e+07	2.76118e+07	2.1989e+07	2.71521e+07	2.66267e+07	2.10065e+07	2.15426e+07	2.1006e+07	3.76342e+07	3.0459e+07	3.47363e+07	2.26099e+07	2.37183e+07	2.28446e+07	2.26341e+07	2.18879e+07	2.58868e+07	2.24934e+07	2.50756e+07	2.51977e+07	1.96478e+07	2.01587e+07	1.94992e+07	GO:0004252, GO:0008236, GO:0006508	atr:18436822||http://www.genome.jp/dbget-bin/www_bget?atr:18436822	---
A0A072UBU6	Phosphoglucan, water dikinase	25497038	Phosphoglucan, water dikinase OS=Medicago truncatula OX=3880 GN=25497038 PE=3 SV=1	0	107.397	21	26	77	26	1202	132.6	6.19	200.62	0	1	3.58218e+07	3.32549e+07	3.20823e+07	3.85304e+07	4.13891e+07	4.15818e+07	4.02715e+07	4.08901e+07	3.65376e+07	3.84959e+07	3.78061e+07	3.74674e+07	4.87424e+07	4.19801e+07	4.66232e+07	3.29343e+07	3.255e+07	3.27661e+07	3.79609e+07	3.86878e+07	4.09817e+07	3.9008e+07	3.96682e+07	3.76102e+07	3.88912e+07	3.75551e+07	3.82956e+07	5.33225e+07	4.99246e+07	5.13346e+07	GO:0016310, GO:0016301, GO:2001070, GO:0005524, GO:0030246	atr:18434984||http://www.genome.jp/dbget-bin/www_bget?atr:18434984	---
A0A396GNE2	ADP/ATP translocase	MtrunA17_Chr8g0352031	ADP/ATP translocase OS=Medicago truncatula OX=3880 GN=MtrunA17_Chr8g0352031 PE=3 SV=1	0	107.342	29	12	156	1	365	39.5	9.79	409.9	17	1	1.92836e+08	1.96322e+08	1.92455e+08	2.08642e+08	1.96613e+08	2.07005e+08	2.26001e+08	2.30423e+08	2.18927e+08	2.13473e+08	2.15233e+08	2.24028e+08	2.24963e+08	2.18449e+08	2.29632e+08	2.09848e+08	1.8095e+08	1.90503e+08	1.83412e+08	1.99112e+08	2.11338e+08	2.2032e+08	2.37594e+08	1.91756e+08	2.27945e+08	1.82972e+08	1.86999e+08	1.86266e+08	1.72816e+08	1.77513e+08	GO:1990544, GO:0140021, GO:0005471, GO:0055085, GO:0005743	atr:18445032||http://www.genome.jp/dbget-bin/www_bget?atr:18445032	---
G7I5U3	Peptide N-acetyl-beta-D-glucosaminyl asparaginase amidase A	11419220	Peptide N-acetyl-beta-D-glucosaminyl asparaginase amidase A OS=Medicago truncatula OX=3880 GN=11419220 PE=4 SV=2	0	107.261	18	12	113	8	607	68.9	7.77	324.27	6	1	5.73075e+07	5.39988e+07	5.90668e+07	4.07974e+07	4.41678e+07	4.20683e+07	4.28462e+07	4.18531e+07	5.38613e+07	4.16611e+07	5.1207e+07	5.14657e+07	3.38962e+07	3.47126e+07	3.41884e+07	5.95757e+07	5.84314e+07	6.36053e+07	4.26041e+07	4.4659e+07	4.38849e+07	4.4099e+07	4.2352e+07	5.76786e+07	4.43381e+07	5.47002e+07	5.46456e+07	3.02132e+07	3.10109e+07	3.10788e+07	---	atr:18442123||http://www.genome.jp/dbget-bin/www_bget?atr:18442123	---
G7IAM4	Tripeptidyl-peptidase II	11429200	Tripeptidyl-peptidase II OS=Medicago truncatula OX=3880 GN=11429200 PE=3 SV=2	0	107.25	15	19	66	16	1369	151.6	6.39	176.72	3	1	4.98931e+06	4.74979e+06	4.60336e+06	5.38416e+06	5.25321e+06	5.55662e+06	5.48873e+06	5.80648e+06	5.33245e+06	5.78135e+06	5.44415e+06	5.46482e+06	1.28742e+07	1.0116e+07	1.13844e+07	6.65761e+06	5.34676e+06	5.73662e+06	5.26506e+06	5.47422e+06	5.49063e+06	5.63624e+06	5.7407e+06	5.36413e+06	5.76493e+06	5.47361e+06	5.46985e+06	8.46139e+06	7.85745e+06	8.6458e+06	GO:0008236, GO:0004252, GO:0008240, GO:0006508	atr:18423030||http://www.genome.jp/dbget-bin/www_bget?atr:18423030	---
I3SK73	Perchloric acid soluble translation inhibitor-like protein	25488952	Perchloric acid soluble translation inhibitor-like protein OS=Medicago truncatula OX=3880 GN=25488952 PE=2 SV=1	0	107.1	55	10	115	7	188	20	8.82	351.2	5	1	2.79491e+08	3.06491e+08	3.31029e+08	2.44577e+08	2.26904e+08	2.32621e+08	1.90626e+08	1.94152e+08	1.42356e+08	1.77763e+08	1.52385e+08	1.40861e+08	1.04667e+08	1.0866e+08	1.12114e+08	2.89974e+08	2.72346e+08	3.09414e+08	2.20642e+08	2.42818e+08	2.44888e+08	2.1417e+08	2.20187e+08	1.36506e+08	2.05144e+08	1.44164e+08	1.35537e+08	1.14068e+08	1.16695e+08	1.18235e+08	---	atr:18444822||http://www.genome.jp/dbget-bin/www_bget?atr:18444822	---
A0A396IE09	Putative Rhodanese-like domain-containing protein	MtrunA17_Chr4g0062121	Putative Rhodanese-like domain-containing protein OS=Medicago truncatula OX=3880 GN=MtrunA17_Chr4g0062121 PE=4 SV=1	0	106.885	29	11	68	11	392	41.7	9.51	231.54	0	1	3.64739e+07	3.75135e+07	3.82835e+07	4.62258e+07	4.75228e+07	5.21406e+07	4.58719e+07	4.71712e+07	4.2536e+07	4.2105e+07	4.20007e+07	4.27924e+07	5.02531e+07	4.40569e+07	4.7174e+07	3.78494e+07	4.04512e+07	4.04299e+07	4.80204e+07	4.75395e+07	5.24731e+07	4.40448e+07	4.40178e+07	4.86842e+07	4.02444e+07	4.75289e+07	4.71405e+07	5.34405e+07	4.63415e+07	5.06009e+07	GO:0009704, GO:0090333, GO:0071277	atr:18448108||http://www.genome.jp/dbget-bin/www_bget?atr:18448108	---
I3S041	Peroxidase		Peroxidase OS=Medicago truncatula OX=3880 PE=2 SV=1	0	106.812	34	10	94	5	319	34.8	7.14	236.34	0	1	4.08291e+07	3.18719e+07	3.77093e+07	2.35392e+07	2.92038e+07	2.71266e+07	2.7061e+07	2.64992e+07	2.59986e+07	2.66436e+07	2.47599e+07	2.46172e+07	2.11219e+07	2.22718e+07	2.17285e+07	4.45194e+07	3.79626e+07	4.36407e+07	2.72471e+07	3.05822e+07	2.97001e+07	2.67148e+07	2.84034e+07	2.78327e+07	2.68153e+07	2.71028e+07	2.6831e+07	1.89096e+07	1.887e+07	1.93164e+07	GO:0006979, GO:0004601, GO:0020037, GO:0042744	atr:18432274||http://www.genome.jp/dbget-bin/www_bget?atr:18432274	Phenylpropanoid biosynthesis
B7FHR0	60S ribosomal L4-like protein	11406297	60S ribosomal L4-like protein OS=Medicago truncatula OX=3880 GN=11406297 PE=2 SV=1	0	106.545	36	13	71	1	408	44.9	10.4	204.05	0	1	1.26633e+06	910274	867152	931484	1.16198e+06	1.16561e+06	1.18773e+06	1.28912e+06	993330	1.27445e+06	1.02623e+06	984156	1.76318e+06	1.76876e+06	1.60079e+06	950623	731004	784371	878930	856955	956170	840411	923233	938387	1.00698e+06	882609	912902	1.85764e+06	1.96056e+06	1.8057e+06	GO:0005840, GO:0003735, GO:0006412	atr:18428056||http://www.genome.jp/dbget-bin/www_bget?atr:18428056	Ribosome
G7IEZ6	Chalcone-flavonone isomerase family protein	11440740	Chalcone-flavonone isomerase family protein OS=Medicago truncatula OX=3880 GN=11440740 PE=2 SV=1	0	106.478	42	9	76	9	222	23.8	5.47	239.25	0	1	5.659e+07	5.85112e+07	5.82908e+07	6.62536e+07	6.83978e+07	7.15358e+07	7.01734e+07	6.82869e+07	6.64288e+07	6.92103e+07	6.58047e+07	6.52949e+07	7.13835e+07	7.40723e+07	6.98436e+07	5.76844e+07	5.97895e+07	5.99775e+07	6.68125e+07	6.80754e+07	7.10567e+07	6.7418e+07	6.83829e+07	6.02676e+07	6.8688e+07	6.18375e+07	6.31641e+07	8.408e+07	8.53737e+07	8.26371e+07	GO:0016872, GO:0009813, GO:0045430	atr:18440481||http://www.genome.jp/dbget-bin/www_bget?atr:18440481	Flavonoid biosynthesis
G7L4U3	Amylomaltase	MTR_7g088740	Amylomaltase OS=Medicago truncatula OX=3880 GN=MTR_7g088740 PE=3 SV=2	0	106.079	18	16	92	16	981	113	5.83	222.15	0	1	3.20486e+07	3.53247e+07	3.61436e+07	4.10662e+07	3.87921e+07	4.12107e+07	4.04357e+07	4.29322e+07	4.05256e+07	4.02446e+07	3.94172e+07	3.99467e+07	4.0217e+07	4.20076e+07	4.04365e+07	3.32895e+07	3.37707e+07	3.38234e+07	3.83496e+07	3.85829e+07	4.05313e+07	4.08185e+07	3.99042e+07	3.7035e+07	4.06778e+07	3.66207e+07	3.74367e+07	3.90179e+07	3.9712e+07	3.87587e+07	GO:2001070, GO:0005975, GO:0030246, GO:0004134	atr:18442847||http://www.genome.jp/dbget-bin/www_bget?atr:18442847	Starch and sucrose metabolism
A0A072UMJ2	Multi-copper oxidase-like protein	25492860	Multi-copper oxidase-like protein OS=Medicago truncatula OX=3880 GN=25492860 PE=3 SV=1	0	105.788	22	12	98	9	543	61	8.84	256.57	4	1	7.48722e+07	6.69615e+07	7.55162e+07	3.85157e+07	3.98667e+07	3.49751e+07	3.48597e+07	3.46696e+07	4.28114e+07	3.4847e+07	4.32189e+07	4.20459e+07	3.10916e+07	3.10797e+07	3.20917e+07	7.54852e+07	6.85127e+07	7.81749e+07	3.73768e+07	4.05277e+07	3.60276e+07	3.60647e+07	3.44647e+07	4.34763e+07	3.62516e+07	4.28722e+07	4.24808e+07	3.06929e+07	3.12453e+07	3.14993e+07	GO:0005507, GO:0016491	atr:18445747||http://www.genome.jp/dbget-bin/www_bget?atr:18445747	---
A0A396HEC4	Alpha-1,4 glucan phosphorylase	MtrunA17_Chr6g0454411	Alpha-1,4 glucan phosphorylase OS=Medicago truncatula OX=3880 GN=MtrunA17_Chr6g0454411 PE=3 SV=1	0	105.741	20	18	55	1	977	110.5	5.68	157.53	18	1	2.2023e+07	2.40595e+07	2.4345e+07	2.45687e+07	2.27641e+07	2.38984e+07	2.24296e+07	2.22963e+07	2.34975e+07	2.24689e+07	2.41241e+07	2.36611e+07	2.71855e+07	2.78385e+07	2.71946e+07	2.13344e+07	2.33322e+07	2.36095e+07	2.28789e+07	2.17389e+07	2.3415e+07	2.25748e+07	2.1101e+07	2.49175e+07	2.31298e+07	2.39607e+07	2.43821e+07	2.81363e+07	2.49118e+07	2.64405e+07	GO:0005975, GO:0008184, GO:0030170, GO:0004645	atr:18427974||http://www.genome.jp/dbget-bin/www_bget?atr:18427974	Starch and sucrose metabolism
G7JLV1	Elongation factor 1-alpha	11414537	Elongation factor 1-alpha OS=Medicago truncatula OX=3880 GN=11414537 PE=3 SV=1	0	105.541	36	13	171	4	447	49.4	9.07	459.56	0	1	1.85272e+07	1.16499e+07	1.40359e+07	8.66827e+06	1.16466e+07	1.12215e+07	1.20629e+07	1.25134e+07	6.20839e+06	1.17219e+07	6.19475e+06	6.2222e+06	9.05948e+06	9.691e+06	8.69535e+06	2.83317e+07	1.38859e+07	1.69633e+07	7.42572e+06	1.08842e+07	9.92748e+06	1.07079e+07	1.12016e+07	5.99479e+06	1.13755e+07	5.75007e+06	6.04777e+06	7.61945e+06	7.69234e+06	7.56106e+06	GO:0005525, GO:0006414, GO:0003746, GO:0003924	atr:18436151||http://www.genome.jp/dbget-bin/www_bget?atr:18436151	RNA transport
G7J0Q8	Cinnamoyl-CoA reductase-like protein	11410793	Cinnamoyl-CoA reductase-like protein OS=Medicago truncatula OX=3880 GN=11410793 PE=4 SV=1	0	105.393	43	13	92	13	319	34.8	5.88	286.55	0	1	5.19227e+07	4.58631e+07	4.68892e+07	5.09818e+07	6.03577e+07	6.0375e+07	4.97056e+07	5.36769e+07	4.26147e+07	4.8224e+07	4.34431e+07	4.42549e+07	6.36556e+07	6.35427e+07	6.2425e+07	5.08773e+07	4.59552e+07	4.62061e+07	5.23148e+07	6.04794e+07	6.12194e+07	5.1199e+07	5.58675e+07	5.01943e+07	4.99799e+07	4.73159e+07	4.93907e+07	6.2933e+07	6.50202e+07	6.24503e+07	GO:0003824	atr:18437141||http://www.genome.jp/dbget-bin/www_bget?atr:18437141	---
A0A072U6L4	Diadenosine tetraphosphate synthetase	25499807	Diadenosine tetraphosphate synthetase OS=Medicago truncatula OX=3880 GN=25499807 PE=3 SV=1	0	105.191	25	19	94	19	686	77	6.55	224.71	0	1	6.74812e+07	6.12469e+07	6.45768e+07	7.09097e+07	8.52078e+07	8.62831e+07	8.31847e+07	8.11975e+07	6.78439e+07	7.972e+07	6.66879e+07	6.73288e+07	7.6651e+07	8.07922e+07	7.59749e+07	6.61902e+07	5.63246e+07	5.79453e+07	6.51334e+07	8.30074e+07	8.60584e+07	7.41737e+07	7.92495e+07	6.49386e+07	7.40369e+07	6.32053e+07	6.37142e+07	8.08551e+07	8.28127e+07	8.07274e+07	GO:0006418, GO:0005737, GO:0006426, GO:0004820, GO:0000166, GO:0004812, GO:0005524	atr:18445351||http://www.genome.jp/dbget-bin/www_bget?atr:18445351	Aminoacyl-tRNA biosynthesis
G7L0M8	Endoplasmic reticulum [ER]-type calcium ATPase, putative	MTR_7g100110	Endoplasmic reticulum [ER]-type calcium ATPase, putative OS=Medicago truncatula OX=3880 GN=MTR_7g100110 PE=4 SV=2	0	105.178	17	16	49	15	1072	117.7	5.4	156.47	1	1	9.25267e+06	7.65173e+06	7.65115e+06	8.58225e+06	9.37502e+06	9.7198e+06	1.02834e+07	1.06728e+07	8.95029e+06	1.07356e+07	8.8867e+06	8.93234e+06	8.46321e+06	8.86127e+06	8.28506e+06	9.56104e+06	8.43986e+06	8.67472e+06	9.23665e+06	9.4139e+06	9.79879e+06	1.02482e+07	1.04002e+07	9.23292e+06	1.00858e+07	9.37923e+06	9.24642e+06	9.48379e+06	9.63263e+06	9.56407e+06	GO:0000166, GO:0005524, GO:0005215, GO:0016021, GO:0140603	atr:18440473||http://www.genome.jp/dbget-bin/www_bget?atr:18440473	---
G7J9I2	Aldo/keto reductase family oxidoreductase	11432729	Aldo/keto reductase family oxidoreductase OS=Medicago truncatula OX=3880 GN=11432729 PE=4 SV=1	0	105.101	38	13	75	12	315	35.1	5.96	228.53	1	1	4.84098e+07	4.91922e+07	5.12178e+07	5.46832e+07	5.58528e+07	5.91133e+07	5.37438e+07	5.55981e+07	4.21463e+07	5.2273e+07	4.34133e+07	4.22596e+07	4.65679e+07	4.96113e+07	4.71872e+07	4.78045e+07	4.79428e+07	4.87996e+07	5.13936e+07	5.47259e+07	5.81219e+07	5.72932e+07	5.65222e+07	4.42483e+07	5.39032e+07	4.28607e+07	4.28883e+07	4.59063e+07	4.66777e+07	4.54335e+07	GO:0016616, GO:0047834, GO:0016491	atr:18439246||http://www.genome.jp/dbget-bin/www_bget?atr:18439246	---
A0A072UX22	NAD-dependent epimerase/dehydratase family protein	25492706	NAD-dependent epimerase/dehydratase family protein OS=Medicago truncatula OX=3880 GN=25492706 PE=4 SV=1	0	104.783	17	9	54	9	641	68	5.67	187.77	0	1	1.42739e+07	1.46273e+07	1.53902e+07	1.31161e+07	1.34303e+07	1.33399e+07	1.38685e+07	1.33427e+07	1.51423e+07	1.40052e+07	1.47135e+07	1.49733e+07	2.32118e+07	1.71435e+07	2.04296e+07	1.35728e+07	1.28904e+07	1.2925e+07	1.32478e+07	1.43782e+07	1.47305e+07	1.53453e+07	1.4641e+07	1.55322e+07	1.56645e+07	1.46664e+07	1.47223e+07	2.1352e+07	1.65425e+07	1.97801e+07	---	atr:18445957||http://www.genome.jp/dbget-bin/www_bget?atr:18445957	---
Q9XG65	Sucrose synthase	sucS1	Sucrose synthase OS=Medicago truncatula OX=3880 GN=sucS1 PE=3 SV=1	0	104.469	25	20	111	16	805	92.3	6.25	266.12	0	1	3.50923e+07	3.44155e+07	3.62955e+07	3.28119e+07	3.2522e+07	3.3519e+07	3.38926e+07	3.40921e+07	3.13648e+07	3.30005e+07	3.23192e+07	3.26035e+07	3.16889e+07	3.217e+07	3.15845e+07	3.50933e+07	3.60917e+07	3.68538e+07	3.35587e+07	3.24593e+07	3.38485e+07	3.24628e+07	3.3116e+07	3.12863e+07	3.26399e+07	3.12064e+07	3.13053e+07	2.96499e+07	3.03946e+07	3.00681e+07	GO:0016757, GO:0005985, GO:0016157	atr:18428723||http://www.genome.jp/dbget-bin/www_bget?atr:18428723	Starch and sucrose metabolism
A0A396HXC5	E1 ubiquitin-activating enzyme	MtrunA17_Chr5g0431151	E1 ubiquitin-activating enzyme OS=Medicago truncatula OX=3880 GN=MtrunA17_Chr5g0431151 PE=3 SV=1	0	104.365	18	19	60	19	1084	120.4	5.38	187.91	0	1	3.36137e+07	3.17411e+07	3.20453e+07	3.35003e+07	3.54227e+07	3.51697e+07	3.4445e+07	3.49131e+07	3.18183e+07	3.48508e+07	3.18e+07	3.20063e+07	3.86157e+07	3.93621e+07	3.77272e+07	3.78514e+07	3.51363e+07	3.65281e+07	3.65376e+07	3.99107e+07	3.975e+07	3.69244e+07	3.77888e+07	3.65505e+07	3.73853e+07	3.48519e+07	3.49045e+07	3.10156e+07	3.11706e+07	3.05129e+07	GO:0008641, GO:0006464	atr:18437136||http://www.genome.jp/dbget-bin/www_bget?atr:18437136	Ubiquitin mediated proteolysis
A0A396IQH9	Putative isopentenyl-diphosphate Delta-isomerase	MtrunA17_Chr3g0093141	Putative isopentenyl-diphosphate Delta-isomerase OS=Medicago truncatula OX=3880 GN=MtrunA17_Chr3g0093141 PE=4 SV=1	0	104.364	23	18	73	18	769	86.7	5.11	220.07	0	1	7.91464e+07	7.33493e+07	8.67133e+07	2.6315e+07	3.0195e+07	2.16763e+07	2.11053e+07	2.09106e+07	2.33758e+07	2.13497e+07	2.49964e+07	2.35424e+07	2.71433e+07	2.85343e+07	2.7588e+07	6.64811e+07	6.16788e+07	7.17706e+07	2.64878e+07	3.12083e+07	2.58309e+07	2.48401e+07	2.54797e+07	2.69466e+07	2.62945e+07	2.68838e+07	2.65276e+07	2.38662e+07	2.42004e+07	2.40612e+07	---	atr:18443657||http://www.genome.jp/dbget-bin/www_bget?atr:18443657	---
A0A072U2J9	Cysteine synthase	11436945	Cysteine synthase OS=Medicago truncatula OX=3880 GN=11436945 PE=3 SV=1	0	103.805	42	11	85	11	320	34.5	5.4	236.18	0	1	3.08456e+07	2.47538e+07	2.59426e+07	2.55239e+07	2.77553e+07	2.7522e+07	2.71592e+07	2.68229e+07	2.18995e+07	2.5252e+07	2.24207e+07	2.21823e+07	3.14152e+07	3.26273e+07	3.16183e+07	2.87932e+07	2.33039e+07	2.4206e+07	2.50287e+07	2.84958e+07	3.01631e+07	2.86071e+07	3.01592e+07	2.07495e+07	2.83244e+07	2.0653e+07	2.06619e+07	2.91148e+07	3.02144e+07	2.92599e+07	GO:0005739, GO:0019499, GO:0004124, GO:0006535, GO:0050017	atr:18422839||http://www.genome.jp/dbget-bin/www_bget?atr:18422839	Cyanoamino acid metabolism
B7FK04	Superoxide dismutase [Cu-Zn]		Superoxide dismutase [Cu-Zn] OS=Medicago truncatula OX=3880 PE=2 SV=1	0	103.694	34	6	44	6	206	21.2	6.58	186.54	0	1	5.24225e+07	3.41878e+07	4.14168e+07	1.22842e+07	1.58262e+07	1.14848e+07	1.41389e+07	1.33952e+07	9.74607e+06	1.36668e+07	1.03542e+07	1.12759e+07	3.26477e+07	3.51554e+07	3.23706e+07	4.51056e+07	4.03675e+07	4.56549e+07	1.84564e+07	2.06023e+07	1.70968e+07	1.63739e+07	1.60301e+07	1.67465e+07	1.7323e+07	1.86502e+07	1.81675e+07	3.60247e+07	3.27671e+07	3.39941e+07	GO:0046872, GO:0006801	atr:18428583||http://www.genome.jp/dbget-bin/www_bget?atr:18428583	Peroxisome
G7LIZ7	Lipoxygenase	11422014	Lipoxygenase OS=Medicago truncatula OX=3880 GN=11422014 PE=3 SV=2	0	103.691	21	19	115	7	864	96.9	6.21	333.85	1	1	5.82437e+06	6.55314e+06	7.07847e+06	5.12129e+06	5.13837e+06	5.06622e+06	5.0727e+06	5.25217e+06	4.49491e+06	4.98586e+06	4.86385e+06	4.78096e+06	1.12732e+07	7.5233e+06	9.61105e+06	7.82231e+06	7.46229e+06	8.09247e+06	5.06526e+06	5.11257e+06	5.21364e+06	4.97081e+06	5.16974e+06	4.95285e+06	5.37206e+06	5.03383e+06	5.19653e+06	9.94959e+06	5.96371e+06	8.20001e+06	GO:0016702, GO:0046872, GO:0016491, GO:0005515	atr:18439893||http://www.genome.jp/dbget-bin/www_bget?atr:18439893	---
G7JFL4	ATP phosphoribosyltransferase	11438625	ATP phosphoribosyltransferase OS=Medicago truncatula OX=3880 GN=11438625 PE=1 SV=1	0	103.59	26	8	61	2	373	40.9	6.55	156.94	8	1	1.70713e+07	1.10183e+07	1.16863e+07	8.97113e+06	1.14708e+07	1.11527e+07	1.20891e+07	1.33006e+07	9.57305e+06	1.27925e+07	1.00452e+07	9.38941e+06	9.23257e+06	9.53545e+06	9.06266e+06	1.87227e+07	1.20663e+07	1.33191e+07	9.45255e+06	1.2138e+07	1.16083e+07	1.3197e+07	1.29337e+07	1.09447e+07	1.28175e+07	1.02678e+07	1.04656e+07	1.01385e+07	1.02576e+07	9.93228e+06	GO:0003879, GO:0000105, GO:0005737, GO:0000287	atr:18424105||http://www.genome.jp/dbget-bin/www_bget?atr:18424105	Histidine metabolism
A0A396JDT6	Putative nepenthesin	MtrunA17_Chr2g0310821	Putative nepenthesin OS=Medicago truncatula OX=3880 GN=MtrunA17_Chr2g0310821 PE=3 SV=1	0	102.992	18	8	89	7	445	49	6.23	273.11	1	1	2.27917e+08	1.16126e+08	1.49056e+08	9.29606e+07	1.22735e+08	1.13339e+08	1.22764e+08	1.31427e+08	9.82822e+07	1.22342e+08	9.452e+07	9.35393e+07	5.02987e+07	5.18664e+07	5.04205e+07	2.2216e+08	1.40359e+08	1.64237e+08	1.04268e+08	1.39196e+08	1.30871e+08	1.3629e+08	1.40207e+08	1.04122e+08	1.37764e+08	9.74441e+07	9.73137e+07	5.18011e+07	5.23145e+07	5.19356e+07	GO:0006508, GO:0004190	atr:18445218||http://www.genome.jp/dbget-bin/www_bget?atr:18445218	---
G7IG01	(1->3)-beta-glucan endohydrolase	11412497	(1->3)-beta-glucan endohydrolase OS=Medicago truncatula OX=3880 GN=11412497 PE=3 SV=1	0	102.671	27	7	77	3	335	37.3	8.53	265.72	0	1	3.94042e+07	3.3645e+07	3.98568e+07	1.16649e+07	1.31891e+07	9.11047e+06	8.60844e+06	8.23425e+06	1.84467e+07	8.73637e+06	1.82909e+07	1.81749e+07	1.6601e+07	1.69614e+07	1.69706e+07	3.87947e+07	3.67238e+07	4.28979e+07	1.17312e+07	1.33754e+07	9.1524e+06	8.05663e+06	6.98785e+06	1.69358e+07	8.1575e+06	1.60707e+07	1.63358e+07	1.51931e+07	1.59848e+07	1.55461e+07	GO:0004553, GO:0005975	atr:18433300||http://www.genome.jp/dbget-bin/www_bget?atr:18433300	---
G7IUE0	LRR receptor-like kinase family protein	11431420	LRR receptor-like kinase family protein OS=Medicago truncatula OX=3880 GN=11431420 PE=4 SV=1	0	102.15	43	17	83	17	375	40.8	8.57	243.57	0	1	1.08374e+08	8.1857e+07	9.38176e+07	4.12382e+07	4.68549e+07	3.95934e+07	4.19121e+07	4.2114e+07	4.29311e+07	4.30669e+07	4.28657e+07	4.44731e+07	5.19983e+07	5.49986e+07	5.17428e+07	1.14917e+08	9.19259e+07	1.01822e+08	4.48397e+07	4.90097e+07	4.34376e+07	4.63712e+07	4.40502e+07	4.63961e+07	4.6452e+07	4.62678e+07	4.62054e+07	5.0375e+07	5.21676e+07	5.0848e+07	GO:0005515	atr:18439913||http://www.genome.jp/dbget-bin/www_bget?atr:18439913	---
G7IPJ9	Phospho-2-dehydro-3-deoxyheptonate aldolase	11418834	Phospho-2-dehydro-3-deoxyheptonate aldolase OS=Medicago truncatula OX=3880 GN=11418834 PE=3 SV=1	0	101.998	28	12	83	8	510	56.6	7.84	234.33	0	1	1.30562e+07	1.19499e+07	1.25552e+07	1.04634e+07	1.05122e+07	1.00731e+07	1.05731e+07	1.05197e+07	1.04151e+07	1.05636e+07	1.08313e+07	1.05183e+07	1.64111e+07	1.68728e+07	1.63421e+07	1.39875e+07	1.29808e+07	1.28945e+07	1.12766e+07	1.06552e+07	1.13798e+07	1.13657e+07	1.15571e+07	1.06939e+07	1.08075e+07	1.09283e+07	1.09161e+07	1.32524e+07	1.36434e+07	1.3346e+07	GO:0003824, GO:0003849, GO:0009073	atr:18423389||http://www.genome.jp/dbget-bin/www_bget?atr:18423389	Phenylalanine, tyrosine and tryptophan biosynthesis
B7FIZ5	Chlorophyll a-b binding protein, chloroplastic	11422473	Chlorophyll a-b binding protein, chloroplastic OS=Medicago truncatula OX=3880 GN=11422473 PE=2 SV=1	0	101.647	38	11	141	11	289	31.5	6.57	370.58	0	1	1.9452e+08	3.62401e+08	3.02285e+08	4.63129e+08	2.58983e+08	3.09196e+08	3.06999e+08	3.01281e+08	5.13901e+08	3.27197e+08	5.4878e+08	5.02427e+08	3.56786e+08	3.6812e+08	3.67221e+08	1.76898e+08	3.72203e+08	3.14055e+08	4.99831e+08	2.67306e+08	3.22252e+08	3.15355e+08	2.93298e+08	5.42041e+08	3.14966e+08	5.7816e+08	5.37965e+08	3.62381e+08	3.72243e+08	3.86866e+08	GO:0016020, GO:0009765	atr:18437933||http://www.genome.jp/dbget-bin/www_bget?atr:18437933	Photosynthesis - antenna proteins
G7JUY1	ATP synthase subunit alpha	MTR_4g079170	ATP synthase subunit alpha OS=Medicago truncatula OX=3880 GN=MTR_4g079170 PE=3 SV=1	0	101.19	26	4	120	3	147	15.9	4.94	384.38	0	1	1.78344e+08	2.19371e+08	2.34084e+08	2.87843e+08	2.61008e+08	3.0698e+08	2.16833e+08	2.24043e+08	1.05461e+08	2.00805e+08	1.22121e+08	1.21614e+08	3.21988e+08	3.41257e+08	3.23562e+08	1.73537e+08	2.06336e+08	2.11872e+08	2.69446e+08	2.64172e+08	2.98099e+08	2.2751e+08	2.22492e+08	1.11106e+08	2.01281e+08	1.31135e+08	1.33118e+08	3.33667e+08	3.48333e+08	3.34734e+08	GO:1902600, GO:0046034	None	---
I3ST27	Germin-like protein	25486501	Germin-like protein OS=Medicago truncatula OX=3880 GN=25486501 PE=2 SV=1	0	101.086	31	3	134	3	210	21.7	7.02	519.51	0	1	2.08201e+08	1.92241e+08	2.02339e+08	1.64607e+08	1.77908e+08	1.7377e+08	1.83843e+08	1.76579e+08	3.40949e+08	1.2613e+08	4.23971e+08	1.3881e+08	6.49877e+07	6.25895e+07	6.6491e+07	2.33734e+08	1.74919e+08	1.82405e+08	1.49131e+08	1.82282e+08	1.79313e+08	2.02056e+08	2.01944e+08	3.40072e+08	1.96947e+08	2.93678e+08	2.86403e+08	4.94981e+07	4.84839e+07	4.90243e+07	GO:0030145	atr:18439437||http://www.genome.jp/dbget-bin/www_bget?atr:18439437	---
A0A396J4A8	Putative Heat shock protein 70 family	MtrunA17_Chr2g0284681	Putative Heat shock protein 70 family OS=Medicago truncatula OX=3880 GN=MtrunA17_Chr2g0284681 PE=3 SV=1	0	100.962	16	9	46	8	603	68.3	7.64	156.02	0	1	1.60904e+07	1.62509e+07	1.70127e+07	1.47497e+07	1.5834e+07	1.55892e+07	1.76678e+07	1.6863e+07	1.38228e+07	1.67047e+07	1.32561e+07	1.33523e+07	1.19543e+07	1.19327e+07	1.15573e+07	1.4785e+07	1.53758e+07	1.61596e+07	1.53618e+07	1.68965e+07	1.83044e+07	1.93241e+07	1.87635e+07	1.74481e+07	1.74639e+07	1.522e+07	1.40959e+07	1.10172e+07	1.11056e+07	1.13853e+07	GO:0005524, GO:0016887	atr:18421799||http://www.genome.jp/dbget-bin/www_bget?atr:18421799	Endocytosis
A0A072VPZ8	Cinnamyl alcohol dehydrogenase-like protein	25485411	Cinnamyl alcohol dehydrogenase-like protein OS=Medicago truncatula OX=3880 GN=25485411 PE=3 SV=1	0	100.942	27	9	47	9	358	38.9	5.83	187.87	0	1	4.29296e+07	4.92834e+07	4.46587e+07	3.93262e+07	3.64319e+07	3.5072e+07	3.27757e+07	3.30643e+07	3.66324e+07	3.24242e+07	3.86605e+07	3.8233e+07	3.83863e+07	3.96349e+07	3.89199e+07	4.24955e+07	4.58649e+07	4.39043e+07	3.91785e+07	3.71104e+07	3.79486e+07	3.61195e+07	3.55628e+07	3.54088e+07	3.53054e+07	3.70211e+07	3.6653e+07	3.90981e+07	4.02292e+07	3.95639e+07	GO:0008270, GO:0016491	atr:18436972||http://www.genome.jp/dbget-bin/www_bget?atr:18436972	Phenylpropanoid biosynthesis
G7KKB4	Succinate--CoA ligase [ADP-forming] subunit alpha, mitochondrial	11414653	Succinate--CoA ligase [ADP-forming] subunit alpha, mitochondrial OS=Medicago truncatula OX=3880 GN=11414653 PE=3 SV=1	0	100.847	32	7	79	7	323	33.8	8.41	245.18	0	1	3.8088e+07	3.92827e+07	3.83546e+07	3.5581e+07	3.00754e+07	2.9096e+07	2.94781e+07	2.90592e+07	3.24651e+07	3.20201e+07	3.41083e+07	3.4107e+07	4.82146e+07	4.47085e+07	4.83111e+07	3.95595e+07	4.26221e+07	3.98348e+07	3.96796e+07	2.91307e+07	3.03518e+07	2.97776e+07	2.94576e+07	3.37595e+07	3.24268e+07	3.75379e+07	3.65193e+07	5.19217e+07	4.24633e+07	4.87528e+07	GO:0003824	atr:18437566||http://www.genome.jp/dbget-bin/www_bget?atr:18437566	Propanoate metabolism
G7KWE8	Fungal proteinase A, aspartic proteinase superfamily protein	11432055	Fungal proteinase A, aspartic proteinase superfamily protein OS=Medicago truncatula OX=3880 GN=11432055 PE=3 SV=1	0	100.728	21	10	115	10	504	55.2	6.46	348.03	0	1	9.87353e+07	1.149e+08	1.24462e+08	8.66029e+07	7.9576e+07	8.40762e+07	7.77205e+07	7.57174e+07	1.52842e+08	7.52971e+07	1.45327e+08	1.26512e+08	4.79851e+07	4.87033e+07	4.73399e+07	1.00987e+08	1.10007e+08	1.23323e+08	8.68144e+07	8.87628e+07	9.12026e+07	7.86795e+07	7.64831e+07	1.50285e+08	7.46936e+07	1.41486e+08	1.23177e+08	4.62578e+07	4.44479e+07	4.73055e+07	GO:0004190, GO:0006629, GO:0006508	atr:18430140||http://www.genome.jp/dbget-bin/www_bget?atr:18430140	---
G7IBQ7	Protein translocase subunit SecA	MTR_1g086050	Protein translocase subunit SecA OS=Medicago truncatula OX=3880 GN=MTR_1g086050 PE=3 SV=1	0	100.62	22	22	85	22	1011	114.2	7.31	209.24	0	1	4.67248e+07	3.8308e+07	3.71539e+07	3.85986e+07	4.57921e+07	4.3647e+07	4.5467e+07	4.55396e+07	3.75788e+07	4.51202e+07	3.80816e+07	3.79681e+07	4.40004e+07	4.61704e+07	4.38219e+07	4.20021e+07	3.82433e+07	3.63518e+07	3.88845e+07	4.29424e+07	4.27419e+07	4.438e+07	4.31754e+07	4.25106e+07	4.32796e+07	4.34777e+07	4.19839e+07	4.54938e+07	4.49633e+07	4.5175e+07	GO:0006605, GO:0017038, GO:0006886, GO:0016020, GO:0005524	atr:18430134||http://www.genome.jp/dbget-bin/www_bget?atr:18430134	Protein export
A0A072UQV2	KDEL-tailed cysteine endopeptidase CEP1	25493676	KDEL-tailed cysteine endopeptidase CEP1 OS=Medicago truncatula OX=3880 GN=25493676 PE=3 SV=1	0	100.552	15	6	55	6	360	40.2	6.9	173.03	0	1	7.28405e+07	6.81608e+07	7.12388e+07	3.70697e+07	4.33682e+07	3.95546e+07	4.08187e+07	3.87131e+07	8.08514e+07	3.88801e+07	8.29446e+07	6.36814e+07	2.35846e+07	2.40326e+07	2.33259e+07	7.93975e+07	6.80633e+07	7.35808e+07	3.81868e+07	4.72195e+07	4.34749e+07	4.21089e+07	4.10346e+07	8.16421e+07	4.39198e+07	7.2798e+07	7.33371e+07	2.08593e+07	2.1391e+07	2.07986e+07	GO:0006508, GO:0008234	atr:18441929||http://www.genome.jp/dbget-bin/www_bget?atr:18441929	---
A0A072V4J6	Fungal proteinase A, aspartic proteinase superfamily protein	MTR_2g023910	Fungal proteinase A, aspartic proteinase superfamily protein OS=Medicago truncatula OX=3880 GN=MTR_2g023910 PE=3 SV=1	0	100.518	21	10	88	10	510	55	6.44	276.82	0	1	9.80944e+07	1.02848e+08	1.11426e+08	6.47529e+07	6.35999e+07	6.15116e+07	6.25054e+07	5.96238e+07	9.16906e+07	5.77641e+07	8.62834e+07	8.80613e+07	4.57454e+07	4.79984e+07	4.79473e+07	9.94992e+07	9.887e+07	1.06787e+08	5.97144e+07	6.80986e+07	6.48281e+07	6.1879e+07	6.11558e+07	8.01265e+07	6.10079e+07	7.45117e+07	7.36357e+07	3.88167e+07	3.85923e+07	3.98087e+07	GO:0004190, GO:0006508, GO:0006629	atr:18430140||http://www.genome.jp/dbget-bin/www_bget?atr:18430140	---
G7IYM7	AICAR transformylase	11429175	AICAR transformylase OS=Medicago truncatula OX=3880 GN=11429175 PE=3 SV=1	0	100.437	26	12	73	2	594	64.5	6.8	197.5	0	1	1.94981e+06	2.08369e+06	2.07002e+06	2.49932e+06	2.24993e+06	2.54676e+06	2.32543e+06	2.18483e+06	2.08117e+06	2.06518e+06	2.08639e+06	2.03309e+06	2.25815e+06	2.35636e+06	2.29224e+06	2.03776e+06	2.27772e+06	2.23523e+06	2.72496e+06	2.61515e+06	2.83808e+06	2.13973e+06	2.14408e+06	2.2339e+06	2.04789e+06	2.24639e+06	2.13016e+06	2.34692e+06	2.4199e+06	2.36886e+06	GO:0003824, GO:0006164, GO:0003937, GO:0004643	atr:18445033||http://www.genome.jp/dbget-bin/www_bget?atr:18445033	One carbon pool by folate
A0A072VGH7	CCT-theta	25482483	CCT-theta OS=Medicago truncatula OX=3880 GN=25482483 PE=3 SV=1	0	100.282	32	15	55	5	543	58.5	5.41	153.4	0	1	4.73629e+06	4.80997e+06	4.707e+06	4.5067e+06	3.97719e+06	4.01925e+06	4.42526e+06	4.15819e+06	4.31724e+06	4.30851e+06	4.60836e+06	4.35644e+06	4.74926e+06	4.82428e+06	4.68025e+06	4.21264e+06	4.65017e+06	4.41576e+06	4.23343e+06	3.92941e+06	3.92901e+06	4.17638e+06	4.16816e+06	4.26821e+06	4.37134e+06	4.47014e+06	4.48696e+06	5.7737e+06	4.55314e+06	5.29477e+06	GO:0006457, GO:0005524, GO:0051082, GO:0016887	atr:18421451||http://www.genome.jp/dbget-bin/www_bget?atr:18421451	---
Q2HVI3	60S ribosomal protein L7	11440629	60S ribosomal protein L7 OS=Medicago truncatula OX=3880 GN=11440629 PE=3 SV=1	0	100.28	48	14	81	1	244	28.5	9.89	214.72	0	1	2.35227e+06	3.23949e+06	3.38564e+06	2.635e+06	2.1308e+06	2.64487e+06	2.05964e+06	1.87772e+06	2.26158e+06	1.56712e+06	2.34169e+06	2.31027e+06	1.0233e+07	1.05198e+07	9.86639e+06	2.36488e+06	3.01808e+06	3.73765e+06	2.6949e+06	2.14666e+06	2.49236e+06	1.81594e+06	1.62052e+06	2.4165e+06	2.03713e+06	2.78952e+06	2.74461e+06	1.05385e+07	1.06966e+07	1.02136e+07	GO:0022625, GO:0003735, GO:0000463	atr:18447580||http://www.genome.jp/dbget-bin/www_bget?atr:18447580	Ribosome
A0A072VPV6	60S ribosomal protein L7	MTR_1g022385	60S ribosomal protein L7 OS=Medicago truncatula OX=3880 GN=MTR_1g022385 PE=3 SV=1	0	100.224	43	14	83	1	275	32.3	9.83	223.05	17	1	4.32065e+07	3.69346e+07	3.97058e+07	3.575e+07	3.9881e+07	4.18852e+07	4.4111e+07	4.55631e+07	3.66804e+07	4.22982e+07	3.52542e+07	3.78545e+07	6.51967e+07	6.59312e+07	6.38416e+07	4.73046e+07	3.95419e+07	4.29592e+07	3.78738e+07	4.32356e+07	4.55004e+07	4.42988e+07	4.32962e+07	4.19136e+07	4.47875e+07	3.82771e+07	4.0863e+07	6.1458e+07	5.74072e+07	5.91528e+07	GO:0022625, GO:0000463, GO:0003735	atr:18447580||http://www.genome.jp/dbget-bin/www_bget?atr:18447580	Ribosome
A0A396GDW4	Putative proteasome endopeptidase complex	MtrunA17_Chr8g0345461	Putative proteasome endopeptidase complex OS=Medicago truncatula OX=3880 GN=MtrunA17_Chr8g0345461 PE=3 SV=1	0	100.107	48	19	100	2	426	47.7	6.47	259.29	19	1	2.9775e+07	2.97206e+07	2.90963e+07	3.2295e+07	3.1266e+07	3.28281e+07	3.28089e+07	3.32331e+07	3.44107e+07	3.45555e+07	3.3373e+07	3.3858e+07	4.20167e+07	4.08476e+07	4.02817e+07	3.23456e+07	3.13388e+07	3.30646e+07	3.30993e+07	3.48224e+07	3.6895e+07	3.66974e+07	3.68073e+07	3.87158e+07	3.59192e+07	3.60683e+07	3.71082e+07	3.23449e+07	3.25371e+07	3.22694e+07	GO:0005524, GO:0030163, GO:0016887, GO:0036402, GO:0005737	atr:18427470||http://www.genome.jp/dbget-bin/www_bget?atr:18427470	Proteasome
G7JQL0	(1->3)-beta-glucan endohydrolase	11445454	(1->3)-beta-glucan endohydrolase OS=Medicago truncatula OX=3880 GN=11445454 PE=3 SV=1	0	100.063	32	9	115	7	329	36.2	6.6	356.05	3	1	2.4147e+08	2.60216e+08	2.98621e+08	1.27804e+08	1.40539e+08	1.23928e+08	1.13305e+08	1.06015e+08	1.35838e+08	1.08858e+08	1.36292e+08	1.31038e+08	1.1326e+08	1.18137e+08	1.14986e+08	2.56047e+08	2.77248e+08	3.12599e+08	1.30021e+08	1.37365e+08	1.19153e+08	1.05252e+08	9.51117e+07	1.39515e+08	9.76549e+07	1.33848e+08	1.34182e+08	9.47753e+07	9.9924e+07	9.89757e+07	GO:0005975, GO:0004553	atr:18433300||http://www.genome.jp/dbget-bin/www_bget?atr:18433300	---
B7FKU9	Methenyltetrahydrofolate cyclohydrolase	11435275	Methenyltetrahydrofolate cyclohydrolase OS=Medicago truncatula OX=3880 GN=11435275 PE=2 SV=1	0	100.044	47	11	57	11	293	31.5	7.53	213.75	0	1	2.93708e+07	2.57253e+07	2.6133e+07	2.82147e+07	3.1761e+07	3.1099e+07	3.07971e+07	3.11053e+07	2.58887e+07	3.09769e+07	2.69192e+07	2.70845e+07	4.69934e+07	3.80263e+07	4.304e+07	3.10438e+07	2.78878e+07	2.81907e+07	2.56482e+07	2.69841e+07	2.72363e+07	2.71314e+07	2.73807e+07	2.65589e+07	2.7975e+07	2.71264e+07	2.75447e+07	4.90997e+07	4.12659e+07	4.47479e+07	GO:0004488, GO:0003824	atr:18430281||http://www.genome.jp/dbget-bin/www_bget?atr:18430281	---
A0A396IFS9	Malate dehydrogenase	MtrunA17_Chr4g0060781	Malate dehydrogenase OS=Medicago truncatula OX=3880 GN=MtrunA17_Chr4g0060781 PE=3 SV=1	0	99.907	35	11	62	11	408	43.1	7.68	209.37	0	1	3.5484e+07	3.55738e+07	3.79298e+07	2.96593e+07	2.6883e+07	2.72609e+07	2.62988e+07	2.78548e+07	2.46362e+07	2.61325e+07	2.76515e+07	2.62554e+07	6.04861e+07	5.93965e+07	5.82208e+07	4.08884e+07	3.53675e+07	3.74471e+07	2.81548e+07	2.89903e+07	2.83419e+07	2.86187e+07	2.92257e+07	2.92639e+07	2.84272e+07	3.51999e+07	3.22837e+07	4.88207e+07	4.9484e+07	4.83191e+07	GO:0005975, GO:0016491, GO:0006099, GO:0030060, GO:0003824, GO:0016616	atr:18422244||http://www.genome.jp/dbget-bin/www_bget?atr:18422244	Citrate cycle (TCA cycle)
B7FJJ4	Pyruvate dehydrogenase E1 component subunit beta	11442185	Pyruvate dehydrogenase E1 component subunit beta OS=Medicago truncatula OX=3880 GN=11442185 PE=2 SV=1	0	99.851	34	10	74	10	361	38.9	6.11	214.53	0	1	3.31687e+07	2.69487e+07	2.78906e+07	3.0669e+07	3.27867e+07	3.40325e+07	3.62768e+07	3.4562e+07	2.65519e+07	3.58173e+07	2.52781e+07	2.66527e+07	2.80261e+07	2.91426e+07	2.76848e+07	3.24308e+07	2.80125e+07	2.86716e+07	2.95796e+07	3.27152e+07	3.41361e+07	3.4343e+07	3.25133e+07	2.7797e+07	3.31163e+07	2.66953e+07	2.70645e+07	2.75853e+07	2.88335e+07	2.78957e+07	GO:0003824, GO:0004739, GO:0006086	atr:18434431||http://www.genome.jp/dbget-bin/www_bget?atr:18434431	Citrate cycle (TCA cycle)
G7J914	Caffeic acid O-methyltransferase	11421675	Caffeic acid O-methyltransferase OS=Medicago truncatula OX=3880 GN=11421675 PE=3 SV=1	0	99.325	36	13	77	13	365	39.9	6.05	247.22	0	1	4.95063e+07	4.35406e+07	4.59213e+07	4.08732e+07	4.57223e+07	4.46103e+07	4.29972e+07	4.48021e+07	3.24391e+07	4.25943e+07	3.36996e+07	3.37398e+07	4.25807e+07	4.30325e+07	4.21967e+07	5.10195e+07	4.30754e+07	4.58068e+07	4.08286e+07	4.68486e+07	4.65397e+07	4.52405e+07	4.74857e+07	3.62125e+07	4.43195e+07	3.62096e+07	3.5604e+07	3.99142e+07	4.03355e+07	4.06702e+07	GO:0008171, GO:0008168, GO:0046983	atr:18424568||http://www.genome.jp/dbget-bin/www_bget?atr:18424568	Phenylpropanoid biosynthesis
I3SJX2	Uncharacterized protein		Uncharacterized protein OS=Medicago truncatula OX=3880 PE=2 SV=1	0	99.224	35	8	66	8	273	28.6	9.67	191.35	0	1	2.87196e+07	2.92968e+07	2.9586e+07	3.12465e+07	2.87621e+07	3.06459e+07	2.94468e+07	2.94538e+07	2.8326e+07	2.8035e+07	2.94097e+07	3.02705e+07	6.65248e+07	4.20775e+07	6.31743e+07	2.58305e+07	2.72981e+07	2.74737e+07	2.97367e+07	2.7693e+07	3.06306e+07	2.908e+07	2.87372e+07	3.0304e+07	2.7465e+07	3.02373e+07	3.15033e+07	6.47255e+07	5.37466e+07	6.09339e+07	GO:0005506, GO:0005515	atr:18443924||http://www.genome.jp/dbget-bin/www_bget?atr:18443924	---
A6XJ27	Thioredoxin reductase		Thioredoxin reductase OS=Medicago truncatula OX=3880 PE=2 SV=1	0	99.051	28	11	46	11	514	56.3	7.25	164.16	0	1	1.9638e+07	2.02341e+07	1.94446e+07	2.34449e+07	2.3473e+07	2.40057e+07	2.45117e+07	2.61966e+07	2.2384e+07	2.50219e+07	2.29167e+07	2.32745e+07	3.55095e+07	3.54062e+07	3.44889e+07	2.44459e+07	2.35519e+07	2.38266e+07	2.35472e+07	2.38833e+07	2.46596e+07	2.6165e+07	2.56634e+07	2.52665e+07	2.54164e+07	2.49792e+07	2.54306e+07	3.00668e+07	3.09477e+07	2.97881e+07	GO:0004791, GO:0019430, GO:0016491, GO:0005737	atr:18428325||http://www.genome.jp/dbget-bin/www_bget?atr:18428325	Selenocompound metabolism
A0A072VDE6	26S proteasome regulatory particle triple-A ATPase protein	25490224	26S proteasome regulatory particle triple-A ATPase protein OS=Medicago truncatula OX=3880 GN=25490224 PE=3 SV=1	0	98.668	36	14	104	13	399	44.7	8.19	294.43	0	1	5.10094e+07	5.10368e+07	5.27655e+07	5.07997e+07	5.25462e+07	5.42581e+07	5.43056e+07	5.40265e+07	4.16872e+07	5.24536e+07	4.28223e+07	4.21447e+07	4.60116e+07	4.71374e+07	4.5666e+07	5.07409e+07	5.11672e+07	5.24637e+07	5.21375e+07	5.45674e+07	5.57076e+07	5.19141e+07	5.38145e+07	4.23577e+07	5.1691e+07	4.27851e+07	4.23479e+07	4.71339e+07	4.79376e+07	4.84357e+07	GO:0016887, GO:0030163, GO:0005524, GO:0005737, GO:0036402	atr:18430632||http://www.genome.jp/dbget-bin/www_bget?atr:18430632	Proteasome
A0A072U332	1,4-alpha-glucan branching enzyme	11427173	1,4-alpha-glucan branching enzyme OS=Medicago truncatula OX=3880 GN=11427173 PE=3 SV=1	0	98.463	26	21	107	21	874	99.7	5.73	231.66	0	1	2.80355e+07	2.38995e+07	2.40784e+07	2.80424e+07	2.79127e+07	2.85055e+07	3.29923e+07	2.90169e+07	2.55688e+07	3.31989e+07	2.57246e+07	2.51345e+07	2.06026e+07	2.10378e+07	2.05876e+07	3.00996e+07	2.67154e+07	2.62929e+07	3.03883e+07	2.87886e+07	2.98803e+07	3.15938e+07	2.97868e+07	2.53281e+07	3.01412e+07	2.60498e+07	2.53482e+07	2.30391e+07	2.38724e+07	2.34959e+07	GO:0005975, GO:0005978, GO:0003824, GO:0003844, GO:0043169, GO:0004553	atr:18441379||http://www.genome.jp/dbget-bin/www_bget?atr:18441379	Starch and sucrose metabolism
B7FLW6	CCT-theta		CCT-theta OS=Medicago truncatula OX=3880 PE=2 SV=1	0	98.248	34	16	50	6	540	58.2	5.4	139.88	11	1	2.43771e+07	2.40041e+07	2.34633e+07	2.43864e+07	2.61423e+07	2.63304e+07	2.57753e+07	2.4509e+07	2.4336e+07	2.5137e+07	2.43682e+07	2.55657e+07	2.87311e+07	2.69411e+07	2.79817e+07	2.62189e+07	2.74854e+07	2.76342e+07	2.67143e+07	2.67522e+07	2.74087e+07	2.64721e+07	2.55553e+07	2.71507e+07	2.70409e+07	2.77007e+07	2.91968e+07	2.80055e+07	2.76526e+07	2.79113e+07	GO:0016887, GO:0005524, GO:0051082, GO:0006457	atr:18421451||http://www.genome.jp/dbget-bin/www_bget?atr:18421451	---
G7L571	UDP-glucose 6-dehydrogenase	11415271	UDP-glucose 6-dehydrogenase OS=Medicago truncatula OX=3880 GN=11415271 PE=3 SV=1	0	97.897	24	12	43	9	480	52.9	5.99	141.23	3	1	2.84175e+07	3.03283e+07	3.06604e+07	3.02595e+07	2.94106e+07	2.98342e+07	2.93515e+07	2.86736e+07	2.7399e+07	2.85009e+07	2.78944e+07	2.81627e+07	4.2888e+07	4.09835e+07	4.33229e+07	2.83905e+07	3.49007e+07	3.46313e+07	3.35957e+07	2.90977e+07	3.02437e+07	2.95441e+07	2.92801e+07	3.10007e+07	2.93954e+07	3.14624e+07	3.10375e+07	4.25907e+07	4.24911e+07	4.28612e+07	GO:0016616, GO:0051287, GO:0003979	atr:18427956||http://www.genome.jp/dbget-bin/www_bget?atr:18427956	Pentose and glucuronate interconversions
I3SHU4	Glyoxylate/succinic semialdehyde reductase	25500766	Glyoxylate/succinic semialdehyde reductase OS=Medicago truncatula OX=3880 GN=25500766 PE=2 SV=1	0	97.738	37	8	42	8	284	30	6.57	136.08	0	1	1.66835e+07	1.601e+07	1.66782e+07	1.57802e+07	1.63547e+07	1.71939e+07	1.61294e+07	1.70106e+07	1.20793e+07	1.58883e+07	1.31227e+07	1.31157e+07	2.86625e+07	1.75565e+07	2.47303e+07	1.83202e+07	1.98806e+07	2.03087e+07	1.8769e+07	1.75578e+07	1.83613e+07	1.62191e+07	1.67023e+07	1.58469e+07	1.54962e+07	1.65071e+07	1.62162e+07	2.56884e+07	1.96869e+07	2.36214e+07	GO:0016491, GO:0051287, GO:0050661	atr:18439504||http://www.genome.jp/dbget-bin/www_bget?atr:18439504	Butanoate metabolism
B7FMW0	40S ribosomal protein S8	25498194	40S ribosomal protein S8 OS=Medicago truncatula OX=3880 GN=25498194 PE=2 SV=1	0	97.695	36	9	63	6	217	24.7	10.37	235.59	3	1	3.65426e+07	3.7239e+07	3.99756e+07	3.69574e+07	3.69987e+07	3.93984e+07	3.4884e+07	3.50785e+07	3.35498e+07	3.25839e+07	3.22455e+07	3.06318e+07	4.8545e+07	4.61513e+07	4.67595e+07	3.80091e+07	3.54865e+07	3.90382e+07	3.57554e+07	3.90563e+07	4.06057e+07	3.47562e+07	3.56499e+07	3.1154e+07	3.41142e+07	3.18544e+07	3.15587e+07	5.04833e+07	4.23703e+07	4.73219e+07	GO:0003735, GO:0005840, GO:0006412	atr:18426597||http://www.genome.jp/dbget-bin/www_bget?atr:18426597	Ribosome
Q4ZGM9	13-hydroperoxide lyase	HPL3	13-hydroperoxide lyase OS=Medicago truncatula OX=3880 GN=HPL3 PE=2 SV=1	0	97.575	27	12	39	12	480	53.7	8.15	115.63	0	1	1.12212e+07	1.18512e+07	1.21941e+07	1.23152e+07	1.25304e+07	1.2792e+07	1.23625e+07	1.21484e+07	1.59649e+07	1.22593e+07	1.62597e+07	1.58375e+07	2.01102e+07	2.01722e+07	1.91554e+07	1.22002e+07	1.39578e+07	1.35249e+07	1.52641e+07	1.40425e+07	1.47933e+07	1.40856e+07	1.38471e+07	1.52167e+07	1.41592e+07	1.56702e+07	1.56447e+07	1.97161e+07	1.94659e+07	1.98449e+07	GO:0020037, GO:0004497, GO:0016705, GO:0005506	atr:18433664||http://www.genome.jp/dbget-bin/www_bget?atr:18433664	alpha-Linolenic acid metabolism
Q2HTY1	NADH:ubiquinone reductase (non-electrogenic)	11425374	NADH:ubiquinone reductase (non-electrogenic) OS=Medicago truncatula OX=3880 GN=11425374 PE=3 SV=1	0	97.543	26	15	58	11	578	65.4	8.02	172.02	4	1	3.17441e+07	2.93584e+07	3.22294e+07	2.69682e+07	2.91045e+07	2.89423e+07	2.44252e+07	2.40116e+07	2.85322e+07	2.39836e+07	2.72048e+07	2.75997e+07	2.27732e+07	2.37047e+07	2.2256e+07	2.71473e+07	2.53369e+07	2.71936e+07	2.6488e+07	2.85444e+07	2.93482e+07	2.79232e+07	2.79731e+07	2.8778e+07	2.78432e+07	2.82984e+07	2.83752e+07	2.6982e+07	2.75106e+07	2.65785e+07	GO:0016491, GO:0006116, GO:0005509, GO:0003954	atr:18431648||http://www.genome.jp/dbget-bin/www_bget?atr:18431648	---
G7I5V9	Papain family cysteine protease	11414263	Papain family cysteine protease OS=Medicago truncatula OX=3880 GN=11414263 PE=3 SV=1	0	97.023	30	10	152	8	364	39.9	7.01	385.83	2	1	5.99439e+08	4.34347e+08	4.2989e+08	3.06575e+08	4.32167e+08	3.85711e+08	9.11571e+08	5.07584e+08	7.518e+09	1.24123e+09	6.22897e+09	6.54345e+09	2.7957e+08	2.39907e+08	1.78024e+08	6.95507e+08	5.6357e+08	5.84661e+08	3.97939e+08	5.16669e+08	4.995e+08	9.67077e+08	5.4969e+08	7.8542e+09	1.02756e+09	6.57181e+09	6.57858e+09	3.20537e+08	2.70785e+08	2.14438e+08	GO:0006508, GO:0008234	atr:18424130||http://www.genome.jp/dbget-bin/www_bget?atr:18424130	---
A0A072ULI6	Putative UDP-glucuronate decarboxylase	25492333	Putative UDP-glucuronate decarboxylase OS=Medicago truncatula OX=3880 GN=25492333 PE=4 SV=1	0	97.014	37	15	61	14	390	43.8	6.04	190.05	1	1	2.55887e+07	2.71896e+07	2.77999e+07	2.72795e+07	2.55964e+07	2.66443e+07	2.53115e+07	2.45566e+07	2.74428e+07	2.53805e+07	2.76118e+07	2.78584e+07	4.61439e+07	4.50557e+07	4.70466e+07	2.5291e+07	2.58334e+07	2.68728e+07	2.44988e+07	2.48889e+07	2.61334e+07	2.25754e+07	2.23557e+07	2.22235e+07	2.26231e+07	2.33762e+07	2.43612e+07	4.86783e+07	4.91276e+07	4.76267e+07	GO:0003824	atr:18441496||http://www.genome.jp/dbget-bin/www_bget?atr:18441496	Amino sugar and nucleotide sugar metabolism
G7JCT4	Putative tripeptidyl-peptidase II	11410429	Putative tripeptidyl-peptidase II OS=Medicago truncatula OX=3880 GN=11410429 PE=3 SV=1	0	96.974	22	14	51	13	757	79.8	6.87	178.84	1	1	2.43143e+07	2.01542e+07	2.22043e+07	1.52985e+07	1.63001e+07	1.53262e+07	1.67915e+07	1.66637e+07	2.07752e+07	1.70577e+07	1.99951e+07	2.08929e+07	1.55452e+07	1.61042e+07	1.55413e+07	2.15277e+07	2.09449e+07	2.14934e+07	1.64042e+07	1.64982e+07	1.6474e+07	1.714e+07	1.68321e+07	2.39521e+07	1.81026e+07	2.31264e+07	2.29718e+07	1.79234e+07	1.78587e+07	1.80199e+07	GO:0006508, GO:0004252, GO:0008236	atr:18431819||http://www.genome.jp/dbget-bin/www_bget?atr:18431819	---
B7FH62	Plastocyanin		Plastocyanin OS=Medicago truncatula OX=3880 PE=2 SV=1	0	96.662	39	3	40	3	167	17.1	5.16	180.18	0	1	8.59932e+06	8.98861e+06	9.04131e+06	9.44812e+06	8.3869e+06	8.86649e+06	8.53147e+06	8.08773e+06	1.0513e+07	8.83855e+06	1.09694e+07	1.10118e+07	2.31531e+07	2.08621e+07	2.17308e+07	9.19784e+06	1.15771e+07	1.13032e+07	1.28547e+07	1.03415e+07	1.0946e+07	9.88448e+06	9.42709e+06	1.47239e+07	1.06186e+07	1.45636e+07	1.46737e+07	2.37972e+07	1.64608e+07	2.20523e+07	GO:0005507, GO:0009055	atr:18424174||http://www.genome.jp/dbget-bin/www_bget?atr:18424174	Photosynthesis
A0A396JT05	Carboxypeptidase	MtrunA17_Chr1g0199171	Carboxypeptidase OS=Medicago truncatula OX=3880 GN=MtrunA17_Chr1g0199171 PE=3 SV=1	0	96.634	20	9	78	8	502	56.1	5.31	185.77	0	1	3.63605e+07	3.21479e+07	3.39685e+07	2.92743e+07	3.12635e+07	2.98611e+07	3.3442e+07	3.10587e+07	3.59203e+07	3.37566e+07	3.32062e+07	3.39838e+07	2.72017e+07	2.77491e+07	2.7299e+07	4.1191e+07	3.48175e+07	3.86623e+07	2.98036e+07	3.41645e+07	3.41408e+07	3.13161e+07	3.17193e+07	2.90233e+07	3.105e+07	2.85008e+07	2.87227e+07	2.61231e+07	2.69799e+07	2.61892e+07	GO:0004185, GO:0006508	atr:18441094||http://www.genome.jp/dbget-bin/www_bget?atr:18441094	---
A0A072TUR1	6-phosphogluconate dehydrogenase, decarboxylating	25502143	6-phosphogluconate dehydrogenase, decarboxylating OS=Medicago truncatula OX=3880 GN=25502143 PE=3 SV=1	0	96.564	42	19	57	16	495	53.8	6	159.03	0	1	2.61358e+07	2.77508e+07	2.71711e+07	2.38309e+07	2.33705e+07	2.35094e+07	2.36816e+07	2.43789e+07	4.33468e+07	2.58043e+07	4.53084e+07	4.0781e+07	3.25474e+07	3.33717e+07	3.11552e+07	2.51277e+07	2.50913e+07	2.48005e+07	2.9962e+07	2.95607e+07	3.12102e+07	3.09686e+07	3.11682e+07	2.71523e+07	3.05554e+07	2.79166e+07	2.77293e+07	4.20114e+07	3.51041e+07	3.8979e+07	GO:0004616, GO:0006098, GO:0016491, GO:0050661	atr:18446226||http://www.genome.jp/dbget-bin/www_bget?atr:18446226	Glutathione metabolism
Q7X9B3	9/13 hydroperoxide lyase	hpl1	9/13 hydroperoxide lyase OS=Medicago truncatula OX=3880 GN=hpl1 PE=2 SV=1	0	96.478	29	13	96	10	482	53.9	6.61	286.77	6	1	3.90476e+07	4.25262e+07	4.26315e+07	4.08823e+07	3.80938e+07	3.96144e+07	3.89637e+07	3.83673e+07	3.90117e+07	3.73596e+07	3.92626e+07	3.94431e+07	3.55248e+07	3.70038e+07	3.54291e+07	3.88909e+07	4.31825e+07	4.26338e+07	4.06397e+07	3.85463e+07	4.07062e+07	3.91514e+07	3.83721e+07	4.17958e+07	3.86655e+07	4.09607e+07	4.07159e+07	3.42901e+07	3.49087e+07	3.43172e+07	GO:0004497, GO:0016705, GO:0005506, GO:0020037	atr:18446004||http://www.genome.jp/dbget-bin/www_bget?atr:18446004	alpha-Linolenic acid metabolism
A0A072VIH3	3-ketoacyl-CoA thiolase 2, peroxisomal-like protein	25483109	3-ketoacyl-CoA thiolase 2, peroxisomal-like protein OS=Medicago truncatula OX=3880 GN=25483109 PE=3 SV=1	0	96.45	32	13	47	12	462	48.3	7.99	129.22	1	1	2.62111e+07	2.30332e+07	2.39323e+07	2.29188e+07	2.62914e+07	2.64885e+07	2.85502e+07	2.98741e+07	2.11239e+07	2.88131e+07	2.10348e+07	2.15684e+07	3.44977e+07	3.26934e+07	3.2737e+07	2.6926e+07	2.0997e+07	2.09323e+07	2.20581e+07	2.67482e+07	2.52381e+07	3.07308e+07	3.41087e+07	1.97865e+07	3.18456e+07	2.04619e+07	2.02395e+07	3.68756e+07	3.34156e+07	3.48646e+07	GO:0016747, GO:0016746	atr:18444168||http://www.genome.jp/dbget-bin/www_bget?atr:18444168	Biosynthesis of unsaturated fatty acids
G7INA7	ABA-responsive protein	11438695	ABA-responsive protein OS=Medicago truncatula OX=3880 GN=11438695 PE=2 SV=1	0	96.42	48	10	99	6	157	16.6	5.07	264.19	5	1	1.0133e+08	9.44255e+07	1.0726e+08	5.93085e+07	7.18785e+07	6.21515e+07	6.84469e+07	7.38084e+07	4.41269e+07	6.53097e+07	4.67067e+07	4.95827e+07	1.30225e+08	1.3521e+08	1.27121e+08	1.04235e+08	1.03075e+08	1.14014e+08	5.72015e+07	6.80919e+07	6.02057e+07	6.1141e+07	6.67375e+07	3.82134e+07	5.80997e+07	4.1733e+07	4.30875e+07	1.34965e+08	1.42448e+08	1.33843e+08	GO:0006952, GO:0004864, GO:0010427, GO:0009738, GO:0038023	atr:18431342||http://www.genome.jp/dbget-bin/www_bget?atr:18431342	---
G7J0E0	PSI-G	MTR_3g010000	PSI-G OS=Medicago truncatula OX=3880 GN=MTR_3g010000 PE=3 SV=2	0	95.824	23	5	84	5	150	16.6	9.7	299.36	0	1	5.74906e+07	7.41075e+07	7.19187e+07	8.07672e+07	6.47784e+07	7.28992e+07	9.33537e+07	9.96434e+07	8.33824e+07	9.04499e+07	8.4908e+07	8.37876e+07	1.14514e+08	1.1957e+08	1.12082e+08	5.21892e+07	5.04866e+07	5.08595e+07	6.17271e+07	7.04231e+07	7.5105e+07	7.65101e+07	7.62825e+07	6.37958e+07	7.49228e+07	6.27015e+07	6.56083e+07	1.05493e+08	1.05799e+08	1.02114e+08	GO:0016020, GO:0009522, GO:0015979	atr:18447403||http://www.genome.jp/dbget-bin/www_bget?atr:18447403	Photosynthesis
Q2HRK7	Protease-associated PA; Proteinase inhibitor I9, subtilisin propeptide	MtrDRAFT_AC158501g3v2	Protease-associated PA; Proteinase inhibitor I9, subtilisin propeptide OS=Medicago truncatula OX=3880 GN=MtrDRAFT_AC158501g3v2 PE=3 SV=1	0	95.821	18	12	53	12	765	81.7	7.52	165.94	0	1	6.07667e+07	4.40491e+07	5.02996e+07	3.11277e+07	4.1232e+07	3.67736e+07	3.73416e+07	3.92498e+07	3.52326e+07	3.80366e+07	3.51408e+07	3.48273e+07	3.15069e+07	3.18501e+07	3.11544e+07	6.72785e+07	4.93316e+07	5.78952e+07	3.27468e+07	3.99815e+07	3.76236e+07	3.34674e+07	3.40426e+07	3.88981e+07	3.28716e+07	3.69313e+07	3.72396e+07	3.10023e+07	3.13255e+07	3.10048e+07	GO:0004252, GO:0008236, GO:0006508	atr:18431819||http://www.genome.jp/dbget-bin/www_bget?atr:18431819	---
G7JXL1	Diaminopimelate decarboxylase	11429414	Diaminopimelate decarboxylase OS=Medicago truncatula OX=3880 GN=11429414 PE=3 SV=1	0	95.329	22	8	61	8	483	53.2	7.03	180.28	0	1	2.42954e+07	2.19326e+07	2.36936e+07	1.74911e+07	1.87005e+07	1.82553e+07	1.76551e+07	1.75075e+07	1.4922e+07	1.74682e+07	1.54663e+07	1.51316e+07	1.73978e+07	1.76642e+07	1.77075e+07	2.46058e+07	2.18816e+07	2.41012e+07	1.94014e+07	2.08489e+07	2.0631e+07	1.96317e+07	2.03717e+07	1.65344e+07	1.88057e+07	1.63666e+07	1.59428e+07	1.61524e+07	1.63335e+07	1.6093e+07	GO:0003824, GO:0008836, GO:0009089	atr:18437261||http://www.genome.jp/dbget-bin/www_bget?atr:18437261	Biosynthesis of amino acids
B7FGZ8	Proteasome subunit beta	11432004	Proteasome subunit beta OS=Medicago truncatula OX=3880 GN=11432004 PE=2 SV=1	0	95.148	47	11	59	11	232	24.9	5.55	187.08	0	1	2.53427e+07	2.45096e+07	2.5151e+07	2.02138e+07	1.98224e+07	1.88077e+07	1.89323e+07	1.85892e+07	1.61958e+07	1.81167e+07	1.7447e+07	1.73444e+07	2.95783e+07	2.97705e+07	2.90422e+07	2.26694e+07	2.28434e+07	2.34039e+07	1.85419e+07	1.82247e+07	1.82728e+07	1.81371e+07	1.79007e+07	2.52869e+07	1.94753e+07	2.47047e+07	2.49987e+07	2.50918e+07	2.1477e+07	2.38189e+07	GO:0005839, GO:0004298, GO:0051603	atr:18440757||http://www.genome.jp/dbget-bin/www_bget?atr:18440757	Proteasome
A0A396JVV7	Uncharacterized protein	MtrunA17_Chr1g0187281	Uncharacterized protein OS=Medicago truncatula OX=3880 GN=MtrunA17_Chr1g0187281 PE=4 SV=1	0	95.123	47	9	59	9	440	34	10.64	202.85	0	1	3.56213e+07	2.88198e+07	2.96501e+07	3.88266e+07	5.281e+07	5.25678e+07	5.1171e+07	5.2575e+07	3.09498e+07	4.81871e+07	2.9584e+07	3.00977e+07	2.18365e+07	2.23405e+07	2.2006e+07	3.45404e+07	3.0066e+07	3.1343e+07	3.91345e+07	5.07008e+07	5.10685e+07	4.81309e+07	4.98014e+07	3.36744e+07	4.80459e+07	3.07555e+07	3.17897e+07	2.39919e+07	2.41729e+07	2.37692e+07	---	None	---
A0A072TZA9	Putative 2-methylene-furan-3-one reductase	MTR_7g034395	Putative 2-methylene-furan-3-one reductase OS=Medicago truncatula OX=3880 GN=MTR_7g034395 PE=3 SV=1	0	95.09	52	14	51	12	317	33.9	5.73	149.3	0	1	1.21611e+07	1.14875e+07	1.16084e+07	1.22391e+07	1.36265e+07	1.32612e+07	1.27985e+07	1.2905e+07	9.83615e+06	1.25751e+07	1.03247e+07	1.03156e+07	2.09956e+07	2.13911e+07	2.07142e+07	1.34827e+07	1.18071e+07	1.24217e+07	1.06146e+07	1.28308e+07	1.16995e+07	1.30684e+07	1.36408e+07	1.72997e+07	1.32492e+07	1.64912e+07	1.70917e+07	1.96265e+07	2.00437e+07	1.92338e+07	GO:0008270, GO:0016491, GO:0016628	atr:18434846||http://www.genome.jp/dbget-bin/www_bget?atr:18434846	---
A0A396J799	Putative aminopeptidase	MtrunA17_Chr2g0305841	Putative aminopeptidase OS=Medicago truncatula OX=3880 GN=MtrunA17_Chr2g0305841 PE=3 SV=1	0	94.931	22	11	56	9	583	61.3	7.61	162.3	0	1	2.54175e+07	2.70856e+07	2.6638e+07	2.0535e+07	2.05085e+07	1.90112e+07	2.13064e+07	2.14561e+07	2.19117e+07	2.1802e+07	2.28403e+07	2.16266e+07	2.35308e+07	1.72979e+07	2.34929e+07	2.4092e+07	2.70761e+07	2.74692e+07	1.95278e+07	1.90393e+07	1.78332e+07	2.05404e+07	2.05633e+07	2.27314e+07	2.04488e+07	2.35798e+07	2.23181e+07	2.61003e+07	1.88165e+07	2.41017e+07	GO:0019538, GO:0030145, GO:0006508, GO:0070006, GO:0005737	atr:18447069||http://www.genome.jp/dbget-bin/www_bget?atr:18447069	Glutathione metabolism
G7JQK3	Beta-adaptin-like protein	11443257	Beta-adaptin-like protein OS=Medicago truncatula OX=3880 GN=11443257 PE=3 SV=1	0	94.832	22	21	64	21	896	99.5	5.08	171.25	0	1	2.3627e+07	2.65843e+07	2.49208e+07	2.70074e+07	2.24083e+07	2.35481e+07	2.18361e+07	2.23717e+07	2.60474e+07	2.24095e+07	2.72221e+07	2.61888e+07	2.49587e+07	2.58745e+07	2.59088e+07	2.33398e+07	2.56427e+07	2.3401e+07	2.82486e+07	2.54053e+07	2.5403e+07	2.50385e+07	2.49297e+07	2.44057e+07	2.48115e+07	2.63851e+07	2.54929e+07	3.182e+07	3.1517e+07	3.34622e+07	GO:0016192, GO:0015031, GO:0030276, GO:0030117, GO:0006886, GO:0030131	atr:18428601||http://www.genome.jp/dbget-bin/www_bget?atr:18428601	---
G7KRQ8	Putative UDP-sulfoquinovose synthase	11416129	Putative UDP-sulfoquinovose synthase OS=Medicago truncatula OX=3880 GN=11416129 PE=4 SV=1	0	94.764	32	13	72	13	477	53.2	7.27	219.6	0	1	2.0436e+07	2.31618e+07	2.32429e+07	2.58863e+07	2.24052e+07	2.45369e+07	2.32308e+07	2.3869e+07	2.23382e+07	2.25348e+07	2.24242e+07	2.24193e+07	2.54379e+07	2.62368e+07	2.51335e+07	2.31923e+07	2.30157e+07	2.4119e+07	2.2052e+07	2.21374e+07	2.2875e+07	2.23427e+07	2.29951e+07	2.09048e+07	2.18209e+07	2.1179e+07	2.08201e+07	2.65813e+07	2.6977e+07	2.63606e+07	GO:0003824	atr:18427061||http://www.genome.jp/dbget-bin/www_bget?atr:18427061	Glycerolipid metabolism
G7JZK0	Asparagine synthetase [glutamine-hydrolyzing]	11426313	Asparagine synthetase [glutamine-hydrolyzing] OS=Medicago truncatula OX=3880 GN=11426313 PE=4 SV=1	0	94.605	29	17	60	11	584	65.8	6.39	168.11	7	1	4.26161e+07	3.72493e+07	3.80909e+07	3.83496e+07	4.0454e+07	4.01095e+07	3.6266e+07	3.54381e+07	4.36096e+07	3.6751e+07	4.24847e+07	4.26997e+07	3.61837e+07	3.68765e+07	3.56171e+07	4.12946e+07	3.64021e+07	3.67813e+07	3.84371e+07	4.16059e+07	4.42421e+07	3.61863e+07	3.61232e+07	3.77384e+07	3.6972e+07	3.74894e+07	3.75427e+07	3.52042e+07	3.40331e+07	3.54536e+07	GO:0004066, GO:0006529	atr:18433448||http://www.genome.jp/dbget-bin/www_bget?atr:18433448	Alanine, aspartate and glutamate metabolism
G7JYH3	HECT-type E3 ubiquitin transferase	11442326	HECT-type E3 ubiquitin transferase OS=Medicago truncatula OX=3880 GN=11442326 PE=4 SV=1	0	94.49	7	23	49	16	3655	401.9	5.21	119.06	7	1	1.2168e+07	1.17484e+07	1.19245e+07	1.28879e+07	1.37101e+07	1.38049e+07	1.39597e+07	1.32814e+07	1.72661e+07	1.37005e+07	1.54941e+07	1.61991e+07	9.72396e+06	1.00124e+07	9.71814e+06	1.2579e+07	1.21259e+07	1.23557e+07	1.31651e+07	1.3716e+07	1.42412e+07	1.3909e+07	1.35975e+07	1.75218e+07	1.43688e+07	1.60182e+07	1.6234e+07	1.05545e+07	1.10162e+07	1.08927e+07	GO:0005515, GO:0004842	atr:18442602||http://www.genome.jp/dbget-bin/www_bget?atr:18442602	Ubiquitin mediated proteolysis
G7LF14	Eukaryotic aspartyl protease family protein	11438564	Eukaryotic aspartyl protease family protein OS=Medicago truncatula OX=3880 GN=11438564 PE=4 SV=1	0	94.269	20	8	47	8	435	47.8	7.52	173.01	0	1	5.72605e+07	4.68797e+07	5.23194e+07	3.42975e+07	4.07759e+07	3.82712e+07	3.79951e+07	3.73727e+07	5.76057e+07	3.58028e+07	5.28505e+07	5.00341e+07	2.03679e+07	2.0182e+07	2.02161e+07	5.54048e+07	4.49879e+07	4.87872e+07	3.66747e+07	4.32604e+07	4.1456e+07	4.40947e+07	4.30548e+07	5.67533e+07	4.1624e+07	5.26459e+07	4.53024e+07	2.25525e+07	2.22476e+07	2.23356e+07	GO:0004190, GO:0006508	atr:18446520||http://www.genome.jp/dbget-bin/www_bget?atr:18446520	---
A0A072UAE2	Peroxidase	25496290	Peroxidase OS=Medicago truncatula OX=3880 GN=25496290 PE=3 SV=1	0	94.254	28	10	119	10	352	38.2	8.27	329.41	0	1	1.27167e+08	1.35894e+08	1.54201e+08	4.63472e+07	5.0553e+07	3.79503e+07	5.21773e+07	4.3298e+07	1.2658e+08	5.99668e+07	1.06479e+08	1.15227e+08	3.43922e+07	3.60057e+07	3.59963e+07	1.5045e+08	1.68054e+08	1.90036e+08	6.25877e+07	7.32095e+07	5.8581e+07	6.02401e+07	5.81165e+07	8.32466e+07	6.08704e+07	8.20828e+07	7.74382e+07	4.48966e+07	4.55415e+07	4.7695e+07	GO:0020037, GO:0042744, GO:0006979, GO:0004601	atr:18436837||http://www.genome.jp/dbget-bin/www_bget?atr:18436837	Phenylpropanoid biosynthesis
A0A072U545	50S ribosomal protein L7/L12	25495155	50S ribosomal protein L7/L12 OS=Medicago truncatula OX=3880 GN=25495155 PE=3 SV=1	0	94.064	43	11	80	11	181	19.1	6.89	231.7	0	1	3.429e+07	3.20785e+07	3.20342e+07	3.68178e+07	4.25657e+07	4.32331e+07	3.99687e+07	4.09898e+07	2.81479e+07	4.30182e+07	3.63383e+07	4.10631e+07	2.05111e+08	1.13676e+08	1.63166e+08	3.04432e+07	3.25393e+07	3.19621e+07	3.46837e+07	3.62339e+07	3.68166e+07	3.33657e+07	3.49578e+07	2.97471e+07	3.68608e+07	3.81872e+07	4.14932e+07	1.8273e+08	1.56439e+08	1.72935e+08	GO:0005840, GO:0003735, GO:0006412	atr:18443613||http://www.genome.jp/dbget-bin/www_bget?atr:18443613	Ribosome
G7IJ55	Putative RNA helicase	11423909	Putative RNA helicase OS=Medicago truncatula OX=3880 GN=11423909 PE=4 SV=2	0	93.997	11	24	81	23	2188	248.1	5.77	199.3	2	1	3.03994e+07	3.2989e+07	3.40656e+07	3.33991e+07	3.20678e+07	3.26834e+07	3.16585e+07	3.20319e+07	3.51292e+07	3.21551e+07	3.62173e+07	3.22222e+07	3.13805e+07	3.19605e+07	3.09553e+07	3.12582e+07	3.37949e+07	3.34624e+07	3.44967e+07	3.28369e+07	3.31255e+07	3.30731e+07	3.28886e+07	3.43078e+07	3.44522e+07	3.68003e+07	3.54225e+07	3.52704e+07	3.30962e+07	3.44719e+07	GO:0005524, GO:0003676	atr:18439704||http://www.genome.jp/dbget-bin/www_bget?atr:18439704	Spliceosome
A0A072VAY5	AP-2 complex subunit alpha	25487490	AP-2 complex subunit alpha OS=Medicago truncatula OX=3880 GN=25487490 PE=3 SV=1	0	93.79	19	18	48	18	1026	114.4	6.3	131.39	0	1	2.78644e+07	2.61746e+07	2.75953e+07	2.75726e+07	2.88465e+07	2.9776e+07	2.81888e+07	2.8231e+07	2.71315e+07	2.7291e+07	2.63968e+07	2.70574e+07	2.94817e+07	3.03546e+07	2.90976e+07	2.90993e+07	2.81126e+07	2.86473e+07	2.85651e+07	2.98412e+07	3.07443e+07	2.86974e+07	2.76174e+07	2.9515e+07	2.80657e+07	2.93097e+07	2.89769e+07	2.65157e+07	2.6885e+07	2.66021e+07	GO:0015031, GO:0030122, GO:0072583, GO:0016192, GO:0035615, GO:0030131, GO:0030117, GO:0006886	atr:18441470||http://www.genome.jp/dbget-bin/www_bget?atr:18441470	Endocytosis
G7JLG0	Citrulline--aspartate ligase	11426372	Citrulline--aspartate ligase OS=Medicago truncatula OX=3880 GN=11426372 PE=3 SV=1	0	93.729	31	16	109	4	478	52.4	7.18	297.77	14	1	6.29269e+07	6.22079e+07	6.38014e+07	7.88655e+07	8.15851e+07	8.79998e+07	7.36281e+07	7.50393e+07	5.57584e+07	6.92872e+07	5.54888e+07	5.5008e+07	5.90099e+07	6.24087e+07	6.07452e+07	6.59082e+07	6.01316e+07	6.2081e+07	7.60592e+07	8.40103e+07	8.74839e+07	7.33352e+07	7.63531e+07	5.68067e+07	7.14055e+07	5.63249e+07	5.67256e+07	6.41388e+07	6.55314e+07	6.58556e+07	GO:0005524, GO:0006526, GO:0004055	atr:18427602||http://www.genome.jp/dbget-bin/www_bget?atr:18427602	Arginine biosynthesis
G7IMZ2	Disease-resistance response protein	11420052	Disease-resistance response protein OS=Medicago truncatula OX=3880 GN=11420052 PE=2 SV=1	0	93.477	46	8	142	8	157	17.2	5.19	414.53	0	1	5.75173e+07	7.31542e+07	6.87455e+07	9.54088e+07	8.23331e+07	9.13598e+07	7.75442e+07	8.19253e+07	7.14176e+07	7.31375e+07	7.42359e+07	6.79419e+07	6.71965e+07	6.31952e+07	6.5764e+07	6.32731e+07	6.90758e+07	6.89959e+07	8.53287e+07	8.28094e+07	9.10924e+07	7.73046e+07	7.77683e+07	6.74775e+07	7.30803e+07	6.76947e+07	6.59216e+07	6.07426e+07	5.73849e+07	6.03195e+07	GO:0009738, GO:0038023, GO:0006952, GO:0010427, GO:0004864	atr:18431334||http://www.genome.jp/dbget-bin/www_bget?atr:18431334	---
G7K558	Insulinase (Peptidase family M16)	11426038	Insulinase (Peptidase family M16) OS=Medicago truncatula OX=3880 GN=11426038 PE=4 SV=2	0	93.465	16	19	49	19	1258	140	6.55	112.96	0	1	1.66251e+07	1.76892e+07	1.76735e+07	2.00055e+07	1.94298e+07	1.99831e+07	1.98936e+07	2.00556e+07	2.0036e+07	1.97778e+07	1.93823e+07	1.96941e+07	1.82583e+07	1.91128e+07	1.84916e+07	1.72036e+07	1.83931e+07	1.81687e+07	2.1543e+07	2.07096e+07	2.16056e+07	2.1371e+07	2.0674e+07	2.24613e+07	2.16128e+07	2.18221e+07	2.18641e+07	1.80021e+07	1.80418e+07	1.80186e+07	GO:0046872	atr:18439648||http://www.genome.jp/dbget-bin/www_bget?atr:18439648	---
I3TAJ1	Putative glutathione transferase	MtrunA17_Chr2g0312771	Putative glutathione transferase OS=Medicago truncatula OX=3880 GN=MtrunA17_Chr2g0312771 PE=2 SV=1	0	93.185	42	14	69	1	219	25.5	6.8	211.97	16	1	2.48039e+07	2.94904e+07	2.86591e+07	3.93914e+07	3.68083e+07	4.10361e+07	3.53591e+07	3.57836e+07	3.1881e+07	3.45455e+07	3.28193e+07	3.4326e+07	6.97119e+07	5.70645e+07	6.27934e+07	2.41223e+07	2.89901e+07	2.78192e+07	3.81196e+07	3.45115e+07	3.9496e+07	3.39319e+07	3.34386e+07	3.12974e+07	3.23998e+07	3.17898e+07	3.36407e+07	7.99952e+07	6.57347e+07	7.19143e+07	GO:0006749, GO:0004364, GO:0005515	atr:18424727||http://www.genome.jp/dbget-bin/www_bget?atr:18424727	Glutathione metabolism
G7JQL4	(1->3)-beta-glucan endohydrolase	11440651	(1->3)-beta-glucan endohydrolase OS=Medicago truncatula OX=3880 GN=11440651 PE=3 SV=1	0	92.816	24	6	78	4	329	36	4.89	291.38	2	1	1.41818e+08	1.3438e+08	1.67788e+08	6.69801e+07	6.83665e+07	6.9369e+07	4.98942e+07	4.59539e+07	5.53001e+07	4.56018e+07	5.39625e+07	5.30228e+07	4.39403e+07	4.22656e+07	4.4354e+07	1.44415e+08	1.32424e+08	1.69317e+08	6.58965e+07	7.56582e+07	7.07134e+07	5.48909e+07	5.2493e+07	6.68049e+07	4.82941e+07	6.01101e+07	6.0537e+07	3.9969e+07	4.0878e+07	4.12182e+07	GO:0004553, GO:0005975	atr:18433300||http://www.genome.jp/dbget-bin/www_bget?atr:18433300	---
A0A072V3L0	Cullin-associated NEDD8-dissociated protein	25494369	Cullin-associated NEDD8-dissociated protein OS=Medicago truncatula OX=3880 GN=25494369 PE=3 SV=1	0	92.74	20	26	93	26	1218	134.3	6	248.28	0	1	4.22931e+07	4.21406e+07	4.33135e+07	4.40687e+07	4.45524e+07	4.54198e+07	4.65981e+07	4.71329e+07	4.44363e+07	4.5642e+07	4.45014e+07	4.40008e+07	4.31289e+07	4.45478e+07	4.29711e+07	4.52075e+07	4.4612e+07	4.53311e+07	4.54448e+07	4.57921e+07	4.78959e+07	4.72273e+07	4.62243e+07	4.9967e+07	4.68095e+07	4.73739e+07	4.80551e+07	3.87073e+07	3.90203e+07	3.87652e+07	GO:0010265	atr:18427798||http://www.genome.jp/dbget-bin/www_bget?atr:18427798	---
G7IKV9	Obg-like ATPase 1	11412443	Obg-like ATPase 1 OS=Medicago truncatula OX=3880 GN=11412443 PE=3 SV=1	0	92.462	41	15	49	15	394	44.3	6.99	137.06	0	1	1.89233e+07	1.9611e+07	1.99534e+07	1.83143e+07	1.88217e+07	1.92961e+07	1.96318e+07	1.97255e+07	1.67907e+07	1.85143e+07	1.72539e+07	1.72609e+07	2.42937e+07	2.4905e+07	2.41634e+07	1.99124e+07	2.23765e+07	2.11238e+07	1.94573e+07	1.95241e+07	1.94566e+07	1.95848e+07	1.99114e+07	1.89792e+07	1.90409e+07	2.04071e+07	1.92377e+07	2.44445e+07	2.44153e+07	2.4546e+07	GO:0005525	atr:18435899||http://www.genome.jp/dbget-bin/www_bget?atr:18435899	---
A0A072URQ0	Glycerophosphodiester phosphodiesterase	25493892	Glycerophosphodiester phosphodiesterase OS=Medicago truncatula OX=3880 GN=25493892 PE=4 SV=1	0	92.404	25	9	115	9	391	45.2	6.07	294.87	0	1	9.54041e+07	8.33099e+07	8.76808e+07	5.33606e+07	5.40867e+07	4.8509e+07	4.96488e+07	5.09363e+07	4.54386e+07	4.59502e+07	4.56319e+07	4.59788e+07	3.51227e+07	3.6442e+07	3.61896e+07	9.45919e+07	8.53973e+07	9.02908e+07	4.92559e+07	5.39831e+07	4.92906e+07	4.52017e+07	4.77826e+07	4.50227e+07	4.66662e+07	4.62013e+07	4.47921e+07	3.46661e+07	3.44707e+07	3.4497e+07	GO:0006629, GO:0008081	atr:18435764||http://www.genome.jp/dbget-bin/www_bget?atr:18435764	Glycerophospholipid metabolism
B7FJ05	Cathepsin B-like cysteine protease	11436390	Cathepsin B-like cysteine protease OS=Medicago truncatula OX=3880 GN=11436390 PE=2 SV=1	0	92.381	27	6	53	6	359	39.7	6.46	166.67	0	1	2.90245e+07	2.50882e+07	2.72585e+07	1.62701e+07	1.68859e+07	1.5491e+07	1.4555e+07	1.47582e+07	1.62283e+07	1.45169e+07	1.67384e+07	1.62068e+07	1.30444e+07	1.36652e+07	1.34434e+07	2.53304e+07	2.42371e+07	2.44113e+07	1.83184e+07	1.7138e+07	1.71136e+07	1.81867e+07	1.7826e+07	1.84211e+07	1.93157e+07	1.88532e+07	1.85592e+07	1.70486e+07	1.74159e+07	1.76282e+07	GO:0050790, GO:0004197, GO:0008234, GO:0006508	atr:18430031||http://www.genome.jp/dbget-bin/www_bget?atr:18430031	---
A0A072VCX2	Aspartate aminotransferase	25490097	Aspartate aminotransferase OS=Medicago truncatula OX=3880 GN=25490097 PE=3 SV=1	0	92.332	36	14	60	13	458	50.2	8.44	172.7	0	1	3.71449e+07	3.68872e+07	3.94491e+07	4.04238e+07	4.30507e+07	4.38141e+07	3.72671e+07	3.91941e+07	2.59549e+07	3.45247e+07	2.75417e+07	2.65837e+07	3.07988e+07	3.14705e+07	3.1183e+07	3.38598e+07	3.51625e+07	3.58981e+07	3.85491e+07	4.10185e+07	4.16541e+07	3.60093e+07	3.68385e+07	3.14652e+07	3.4811e+07	3.07621e+07	3.07234e+07	3.31711e+07	3.33829e+07	3.29382e+07	GO:0006520, GO:0009058, GO:0030170, GO:0003824, GO:0008483	atr:18426621||http://www.genome.jp/dbget-bin/www_bget?atr:18426621	Phenylalanine, tyrosine and tryptophan biosynthesis
A0A7H1KPC7	Ribosomal protein L2	MtrunA17_Chr3g0094621.2	Ribosomal protein L2 OS=Medicago truncatula OX=3880 GN=MtrunA17_Chr3g0094621.2 PE=3 SV=1	0	92.257	44	10	96	5	263	28.8	10.87	250.72	5	1	2.88398e+07	3.03119e+07	2.75094e+07	3.54859e+07	3.3676e+07	3.54504e+07	4.65566e+07	4.93235e+07	3.34479e+07	4.8837e+07	3.4457e+07	3.50702e+07	5.38019e+07	5.63839e+07	5.25716e+07	2.49626e+07	2.57804e+07	2.37265e+07	3.01513e+07	3.08243e+07	3.24581e+07	3.91472e+07	4.00114e+07	2.89647e+07	3.9781e+07	3.07595e+07	3.0732e+07	6.19357e+07	4.76264e+07	5.5491e+07	GO:0016740, GO:0005840, GO:0006412, GO:0003723, GO:0003735, GO:0015934	atr:2546594|rpl2, AmtrCp095|http://www.genome.jp/dbget-bin/www_bget?atr:2546594	Ribosome
G7LE33	40S ribosomal protein S12	11436771	40S ribosomal protein S12 OS=Medicago truncatula OX=3880 GN=11436771 PE=2 SV=1	0	92.055	57	7	43	3	143	15.2	5.78	154.28	0	1	1.04982e+07	7.77742e+06	7.75881e+06	6.88822e+06	1.03682e+07	9.47498e+06	9.99916e+06	9.83489e+06	8.20214e+06	1.01769e+07	7.90247e+06	8.26661e+06	9.17526e+06	9.40195e+06	8.90248e+06	1.20767e+07	6.16627e+06	6.26006e+06	4.81712e+06	1.14642e+07	9.61546e+06	1.13756e+07	1.211e+07	5.33608e+06	1.07801e+07	5.13106e+06	5.12232e+06	5.6372e+06	5.67231e+06	5.48269e+06	GO:0003735, GO:0005840, GO:0006412	atr:18435934||http://www.genome.jp/dbget-bin/www_bget?atr:18435934	Ribosome
G7K3P1	40S ribosomal protein S3a	11443151	40S ribosomal protein S3a OS=Medicago truncatula OX=3880 GN=11443151 PE=3 SV=1	0	92.04	41	14	99	3	261	29.8	9.86	280.27	14	1	8.06829e+07	8.22689e+07	8.53685e+07	8.47019e+07	9.03448e+07	9.28813e+07	8.6493e+07	9.05545e+07	7.19867e+07	8.17552e+07	7.39069e+07	7.50185e+07	1.31867e+08	1.37734e+08	1.27977e+08	8.92859e+07	8.39651e+07	8.4601e+07	8.59113e+07	9.01678e+07	9.36671e+07	9.17663e+07	8.94658e+07	7.97293e+07	9.04864e+07	8.16411e+07	8.18559e+07	1.28895e+08	1.31322e+08	1.26134e+08	GO:0003735, GO:0005840, GO:0006412	atr:18438511||http://www.genome.jp/dbget-bin/www_bget?atr:18438511	Ribosome
G7K2D0	Photosystem I reaction center subunit II	11438662	Photosystem I reaction center subunit II OS=Medicago truncatula OX=3880 GN=11438662 PE=2 SV=1	0	91.895	29	6	111	6	209	23	9.57	343.71	0	1	6.52978e+07	7.27992e+07	7.09247e+07	8.43628e+07	8.07664e+07	8.67326e+07	9.079e+07	8.81883e+07	7.76717e+07	8.98493e+07	8.20782e+07	8.44102e+07	2.07631e+08	2.08296e+08	1.99913e+08	6.19665e+07	6.94425e+07	6.88295e+07	8.54387e+07	8.45961e+07	9.30676e+07	9.08572e+07	9.02938e+07	7.25646e+07	8.93607e+07	7.81595e+07	8.24168e+07	2.00239e+08	1.85553e+08	1.87525e+08	GO:0015979, GO:0009538, GO:0009522	atr:18428887||http://www.genome.jp/dbget-bin/www_bget?atr:18428887	Photosynthesis
I3SLE4	Ribosomal_L18_c domain-containing protein		Ribosomal_L18_c domain-containing protein OS=Medicago truncatula OX=3880 PE=2 SV=1	0	91.876	27	11	62	2	302	34.6	9.04	217.42	9	1	2.10552e+07	2.00402e+07	2.0631e+07	1.93716e+07	2.04037e+07	2.06182e+07	1.95757e+07	1.99242e+07	1.7139e+07	1.81558e+07	1.80775e+07	1.866e+07	4.20686e+07	3.8816e+07	4.0047e+07	1.98864e+07	1.94274e+07	2.0147e+07	2.00506e+07	2.15978e+07	2.25047e+07	2.05945e+07	2.07697e+07	1.86226e+07	2.01729e+07	1.93007e+07	1.96234e+07	4.00423e+07	3.22994e+07	3.92199e+07	GO:0005840, GO:0008097, GO:0003735, GO:0006412	atr:18448669||http://www.genome.jp/dbget-bin/www_bget?atr:18448669	Ribosome
G7JG50	Coatomer subunit gamma	11413931	Coatomer subunit gamma OS=Medicago truncatula OX=3880 GN=11413931 PE=3 SV=1	0	91.817	21	19	88	11	885	98.2	5.21	230.58	8	1	5.30321e+07	4.74993e+07	4.8748e+07	5.17953e+07	5.24549e+07	5.20941e+07	5.71244e+07	5.84254e+07	4.99796e+07	5.77864e+07	4.78519e+07	4.87329e+07	4.17776e+07	4.23541e+07	4.18458e+07	5.54345e+07	4.82887e+07	5.02997e+07	4.81508e+07	5.14855e+07	5.29296e+07	5.61877e+07	5.71697e+07	4.93291e+07	5.70224e+07	4.80119e+07	4.78523e+07	3.95753e+07	4.04019e+07	4.04715e+07	GO:0006886, GO:0016192, GO:0030126, GO:0030117, GO:0005198	atr:18445844||http://www.genome.jp/dbget-bin/www_bget?atr:18445844	---
G7L1X0	GDP-D-mannose-3,5-epimerase	11429807	GDP-D-mannose-3,5-epimerase OS=Medicago truncatula OX=3880 GN=11429807 PE=4 SV=1	0	91.74	38	14	60	8	411	46.4	6.47	188.2	0	1	2.28456e+07	2.37385e+07	2.44947e+07	2.32829e+07	2.2e+07	2.32793e+07	2.06896e+07	2.01458e+07	2.35282e+07	2.10126e+07	2.27122e+07	2.31737e+07	2.51812e+07	2.57557e+07	2.50374e+07	2.21244e+07	2.23524e+07	2.37762e+07	2.10127e+07	2.04166e+07	2.18378e+07	2.20169e+07	2.03319e+07	2.56691e+07	2.2728e+07	2.39767e+07	2.46186e+07	2.50091e+07	2.45358e+07	2.41037e+07	GO:0047918, GO:0051287, GO:0003824	atr:18429544||http://www.genome.jp/dbget-bin/www_bget?atr:18429544	Ascorbate and aldarate metabolism
B7FLG1	Peptidase A1 domain-containing protein		Peptidase A1 domain-containing protein OS=Medicago truncatula OX=3880 PE=2 SV=1	0	91.638	27	11	98	11	452	48.6	8.81	273.29	0	1	2.36019e+08	1.89828e+08	2.04331e+08	1.27887e+08	1.60771e+08	1.49107e+08	1.48957e+08	1.49561e+08	2.02017e+08	1.51441e+08	1.86884e+08	1.89584e+08	9.83124e+07	1.02934e+08	9.93877e+07	2.10239e+08	1.68626e+08	1.83514e+08	1.20643e+08	1.61686e+08	1.53427e+08	1.53031e+08	1.48408e+08	1.90545e+08	1.53578e+08	1.73907e+08	1.74832e+08	9.84492e+07	9.91188e+07	9.75411e+07	GO:0004190, GO:0006508	atr:18447393||http://www.genome.jp/dbget-bin/www_bget?atr:18447393	---
G7LGQ4	Putative Acid phosphatase	11431124	Putative Acid phosphatase OS=Medicago truncatula OX=3880 GN=11431124 PE=2 SV=1	0	91.566	38	12	150	12	261	29.9	7.09	399.23	0	1	5.8368e+08	5.54243e+08	6.58986e+08	3.59356e+08	3.76123e+08	3.7522e+08	2.68984e+08	2.79051e+08	3.84852e+08	2.61989e+08	3.59167e+08	3.60304e+08	1.6432e+08	1.69514e+08	1.75085e+08	6.51505e+08	5.61385e+08	6.66725e+08	3.55866e+08	3.93361e+08	3.86775e+08	3.20333e+08	3.02863e+08	4.22639e+08	3.05325e+08	3.77159e+08	3.86196e+08	1.57677e+08	1.59828e+08	1.61285e+08	GO:0003993	atr:18443489||http://www.genome.jp/dbget-bin/www_bget?atr:18443489	---
G7KYP4	Beta-mannosidase	11430551	Beta-mannosidase OS=Medicago truncatula OX=3880 GN=11430551 PE=3 SV=1	0	91.362	14	14	81	8	966	109.7	5.55	232.01	0	1	4.34937e+07	3.47803e+07	4.12457e+07	2.29767e+07	2.25638e+07	2.07e+07	2.14708e+07	2.06564e+07	2.70941e+07	2.04482e+07	2.67159e+07	2.62241e+07	2.32675e+07	2.38545e+07	2.35499e+07	4.88883e+07	3.48337e+07	4.17298e+07	2.16618e+07	2.45777e+07	2.29188e+07	2.34867e+07	2.40769e+07	2.6419e+07	2.24787e+07	2.514e+07	2.49044e+07	1.99145e+07	2.02661e+07	2.01627e+07	GO:0005975, GO:0033947, GO:0004553	atr:18440882||http://www.genome.jp/dbget-bin/www_bget?atr:18440882	---
A0A072VEV1	ABC-type xenobiotic transporter	11441852	ABC-type xenobiotic transporter OS=Medicago truncatula OX=3880 GN=11441852 PE=3 SV=1	0	91.224	16	20	64	18	1382	154.2	7.03	145.46	2	1	1.86307e+07	1.83552e+07	1.7172e+07	2.20581e+07	2.4536e+07	2.43065e+07	2.54591e+07	2.6312e+07	2.23939e+07	2.54473e+07	2.26343e+07	2.22381e+07	2.30807e+07	2.37389e+07	2.31528e+07	1.97959e+07	1.94083e+07	1.88505e+07	2.25234e+07	2.47199e+07	2.59261e+07	2.69797e+07	2.74643e+07	2.42696e+07	2.69707e+07	2.40521e+07	2.39504e+07	2.14372e+07	2.20401e+07	2.17039e+07	GO:0140359, GO:0055085, GO:0016021, GO:0005524	atr:18427186||http://www.genome.jp/dbget-bin/www_bget?atr:18427186	---
A0A072UZK8	Rhodanese/cell cycle control phosphatase superfamily protein	MTR_3g084030	Rhodanese/cell cycle control phosphatase superfamily protein OS=Medicago truncatula OX=3880 GN=MTR_3g084030 PE=4 SV=1	0	90.979	11	14	70	14	1350	148.1	9	202.42	0	1	3.38732e+07	3.68901e+07	3.69153e+07	4.04133e+07	3.82948e+07	4.02235e+07	3.92325e+07	3.81614e+07	4.45155e+07	3.93112e+07	4.20966e+07	4.2944e+07	2.84651e+07	3.01873e+07	2.9151e+07	3.44769e+07	3.73463e+07	3.70966e+07	4.08225e+07	3.78833e+07	4.17115e+07	3.83015e+07	3.79264e+07	4.62576e+07	3.86222e+07	4.43118e+07	4.4637e+07	3.13409e+07	3.2702e+07	3.20405e+07	GO:0009704, GO:0090333, GO:0071277	atr:18448667||http://www.genome.jp/dbget-bin/www_bget?atr:18448667	---
A0A072TYP7	Peptidylprolyl isomerase	25498196	Peptidylprolyl isomerase OS=Medicago truncatula OX=3880 GN=25498196 PE=4 SV=1	0	90.964	26	16	62	16	544	61.3	5.16	162.73	0	1	1.16445e+07	1.18615e+07	1.16526e+07	1.41409e+07	1.28403e+07	1.39427e+07	1.29502e+07	1.36097e+07	1.24187e+07	1.32556e+07	1.34746e+07	1.40169e+07	3.6982e+07	3.17798e+07	3.33916e+07	1.39222e+07	1.24679e+07	1.26428e+07	1.35529e+07	1.39912e+07	1.44242e+07	1.3505e+07	1.34596e+07	1.47844e+07	1.32009e+07	1.46999e+07	1.52147e+07	2.93647e+07	3.02935e+07	2.889e+07	GO:0005515, GO:0003755	atr:18430712||http://www.genome.jp/dbget-bin/www_bget?atr:18430712	---
I3TAS1	Glutathione reductase	25495943	Glutathione reductase OS=Medicago truncatula OX=3880 GN=25495943 PE=2 SV=1	0	90.525	27	13	48	13	498	53.8	6.74	139.24	0	1	4.06399e+07	3.4908e+07	3.60516e+07	3.06016e+07	3.47243e+07	3.41901e+07	3.47941e+07	3.48115e+07	3.1179e+07	3.19259e+07	3.13848e+07	3.16127e+07	6.3394e+07	6.57409e+07	6.22914e+07	4.36686e+07	3.94439e+07	3.89816e+07	3.47178e+07	3.65283e+07	3.57474e+07	3.80834e+07	3.70661e+07	3.98223e+07	3.96619e+07	3.91939e+07	3.883e+07	6.33167e+07	5.98817e+07	5.97589e+07	GO:0050661, GO:0045454, GO:0006749, GO:0050660, GO:0016491, GO:0004362, GO:0016668	atr:18447241||http://www.genome.jp/dbget-bin/www_bget?atr:18447241	Glutathione metabolism
A0A396I1B9	Putative RNA helicase	MtrunA17_Chr4g0003441	Putative RNA helicase OS=Medicago truncatula OX=3880 GN=MtrunA17_Chr4g0003441 PE=4 SV=1	0	90.498	32	13	67	5	488	55.2	5.76	225.08	10	1	3.44205e+07	3.30149e+07	3.42843e+07	3.56083e+07	3.70808e+07	3.84865e+07	3.88894e+07	3.88097e+07	3.18925e+07	3.78641e+07	3.13051e+07	3.16809e+07	2.86497e+07	2.95845e+07	2.88448e+07	3.70059e+07	3.4918e+07	3.69602e+07	3.52043e+07	3.6606e+07	3.78263e+07	3.61992e+07	3.76914e+07	3.22658e+07	3.59058e+07	3.13179e+07	3.18573e+07	3.10535e+07	3.15439e+07	3.12104e+07	GO:0003676, GO:0003724, GO:0005524	atr:18443738||http://www.genome.jp/dbget-bin/www_bget?atr:18443738	mRNA surveillance pathway
A0A072U1I8	Glutamate dehydrogenase	MTR_7g085630	Glutamate dehydrogenase OS=Medicago truncatula OX=3880 GN=MTR_7g085630 PE=3 SV=1	0	90.457	23	9	32	4	492	53.9	7.93	124.49	0	1	1.15288e+07	7.78898e+06	9.57336e+06	2.98318e+06	3.55792e+06	2.57389e+06	2.73685e+06	2.91383e+06	2.44873e+06	2.77791e+06	2.69088e+06	2.61787e+06	3.02927e+06	3.18222e+06	3.1371e+06	9.82159e+06	7.06493e+06	7.44474e+06	4.2357e+06	4.12186e+06	3.56298e+06	3.83796e+06	4.01884e+06	4.04525e+06	4.23645e+06	4.4261e+06	4.25431e+06	3.89789e+06	4.01702e+06	4.06747e+06	GO:0016639, GO:0006520, GO:0016491	atr:18421426||http://www.genome.jp/dbget-bin/www_bget?atr:18421426	Nitrogen metabolism
G7KTM5	Carbohydrate-binding-like fold protein	11434792	Carbohydrate-binding-like fold protein OS=Medicago truncatula OX=3880 GN=11434792 PE=4 SV=2	0	90.449	16	17	44	17	1196	130.4	6.06	115.53	0	1	1.28425e+07	1.23887e+07	1.26298e+07	1.4637e+07	1.57716e+07	1.61644e+07	1.71646e+07	1.81388e+07	1.33874e+07	1.72051e+07	1.29775e+07	1.32706e+07	1.33517e+07	1.38548e+07	1.32596e+07	1.43044e+07	1.20305e+07	1.23906e+07	1.34858e+07	1.71786e+07	1.69049e+07	1.69279e+07	1.66661e+07	1.34713e+07	1.71032e+07	1.27228e+07	1.28938e+07	1.14657e+07	1.18881e+07	1.14171e+07	GO:0030246	atr:18431244||http://www.genome.jp/dbget-bin/www_bget?atr:18431244	---
G7KEN2	Chlorophyll a-b binding protein, chloroplastic	11434875	Chlorophyll a-b binding protein, chloroplastic OS=Medicago truncatula OX=3880 GN=11434875 PE=3 SV=1	0	90.287	33	7	680	3	265	28.7	5.44	1924.27	0	1	2.1919e+08	2.73025e+08	2.86746e+08	3.258e+08	3.12241e+08	3.42807e+08	1.62312e+08	1.60072e+08	3.72789e+08	1.73726e+08	3.51024e+08	3.68537e+08	3.51174e+08	3.68978e+08	3.43843e+08	2.33188e+08	2.82554e+08	3.04799e+08	3.26425e+08	3.25491e+08	3.74761e+08	1.70034e+08	1.74883e+08	4.10332e+08	1.73219e+08	3.72961e+08	3.82362e+08	3.60196e+08	3.46982e+08	3.34706e+08	GO:0016020, GO:0009765	atr:18427642||http://www.genome.jp/dbget-bin/www_bget?atr:18427642	Photosynthesis - antenna proteins
G7J5N1	Putative alcohol dehydrogenase	11411514	Putative alcohol dehydrogenase OS=Medicago truncatula OX=3880 GN=11411514 PE=3 SV=2	0	89.923	34	11	65	3	381	41.2	6.15	174.16	0	1	3.34472e+06	3.12842e+06	2.97276e+06	2.97929e+06	3.12987e+06	3.28763e+06	3.37078e+06	3.31684e+06	2.65826e+06	3.18931e+06	2.76627e+06	2.78954e+06	2.89835e+06	2.89734e+06	2.78872e+06	3.36025e+06	3.19595e+06	3.14721e+06	3.29344e+06	3.23296e+06	3.44915e+06	3.45377e+06	3.49792e+06	3.58225e+06	3.42843e+06	3.62636e+06	3.6039e+06	2.79052e+06	2.96507e+06	2.92167e+06	GO:0016491, GO:0008270	atr:18448318||http://www.genome.jp/dbget-bin/www_bget?atr:18448318	Tyrosine metabolism
I3S4Q3	Glyoxalase I		Glyoxalase I OS=Medicago truncatula OX=3880 PE=2 SV=1	0	89.662	30	8	73	4	281	31.5	5.19	274.35	6	1	3.44705e+08	3.80203e+08	4.83113e+08	7.19267e+07	1.17763e+08	7.57937e+07	6.41921e+07	6.62194e+07	5.28793e+07	6.16373e+07	6.30025e+07	5.7426e+07	9.32832e+07	8.77829e+07	9.18066e+07	3.41974e+08	3.00941e+08	3.74347e+08	9.53565e+07	1.23907e+08	9.08122e+07	8.58808e+07	8.336e+07	6.65156e+07	8.45866e+07	7.00987e+07	6.65015e+07	8.04558e+07	8.23803e+07	8.35484e+07	GO:0004462, GO:0046872	atr:18445735||http://www.genome.jp/dbget-bin/www_bget?atr:18445735	Metabolic pathways
G7LBA5	60S ribosomal L6-like protein	MTR_8g091910	60S ribosomal L6-like protein OS=Medicago truncatula OX=3880 GN=MTR_8g091910 PE=3 SV=1	0	89.642	49	12	35	5	219	24.4	10.08	111.49	0	1	1.05253e+07	1.17821e+07	1.18228e+07	1.04911e+07	9.73963e+06	1.04492e+07	9.45837e+06	9.21882e+06	1.34222e+07	9.41801e+06	1.30188e+07	1.39443e+07	2.77852e+07	2.23425e+07	2.48284e+07	1.40728e+07	1.37096e+07	1.47194e+07	1.0725e+07	1.01813e+07	1.06682e+07	1.00862e+07	1.00938e+07	1.10346e+07	9.64498e+06	1.13639e+07	1.15838e+07	2.77863e+07	2.02205e+07	2.49902e+07	GO:0005840, GO:0003735, GO:0006412	atr:18439865||http://www.genome.jp/dbget-bin/www_bget?atr:18439865	Ribosome
G7J9A2	NAD-dependent epimerase/dehydratase family protein	11418459	NAD-dependent epimerase/dehydratase family protein OS=Medicago truncatula OX=3880 GN=11418459 PE=4 SV=2	0	89.273	36	14	78	14	393	43.8	8.85	222.75	0	1	3.07428e+07	3.1666e+07	3.27419e+07	3.80867e+07	3.94304e+07	4.0981e+07	3.79489e+07	4.08801e+07	3.28094e+07	3.66619e+07	3.2781e+07	3.37961e+07	4.28406e+07	4.56852e+07	4.21378e+07	3.36001e+07	3.7136e+07	3.6003e+07	3.75881e+07	3.62093e+07	3.79887e+07	3.53942e+07	3.59799e+07	3.60847e+07	3.59553e+07	3.69063e+07	3.65119e+07	4.95043e+07	4.56891e+07	4.69724e+07	---	atr:18424294||http://www.genome.jp/dbget-bin/www_bget?atr:18424294	---
A0A072U103	Acetyl-CoA carboxytransferase	MTR_7g066870	Acetyl-CoA carboxytransferase OS=Medicago truncatula OX=3880 GN=MTR_7g066870 PE=3 SV=1	0	89.256	19	16	59	16	860	95.4	9.35	161.24	0	1	1.40373e+07	1.35724e+07	1.28106e+07	1.34384e+07	1.44363e+07	1.36041e+07	1.47588e+07	1.45682e+07	1.43765e+07	1.47012e+07	1.4703e+07	1.4791e+07	2.19812e+07	2.27263e+07	2.17987e+07	1.26537e+07	1.30347e+07	1.29701e+07	1.38575e+07	1.42606e+07	1.39153e+07	1.37911e+07	1.43203e+07	1.21851e+07	1.42472e+07	1.2676e+07	1.28152e+07	2.33407e+07	2.43133e+07	2.30802e+07	GO:0009317, GO:0016874, GO:0003989, GO:0006633	atr:18437818||http://www.genome.jp/dbget-bin/www_bget?atr:18437818	Propanoate metabolism
B7FHD5	Putative pentapeptide	25491136	Putative pentapeptide OS=Medicago truncatula OX=3880 GN=25491136 PE=2 SV=1	0	89.211	38	8	79	8	240	25.6	7.9	199.57	0	1	3.67626e+07	3.69435e+07	3.67031e+07	3.87564e+07	3.60225e+07	3.68185e+07	3.86809e+07	3.9288e+07	3.65328e+07	4.08812e+07	3.68366e+07	3.67309e+07	4.69698e+07	4.85529e+07	4.6863e+07	3.39461e+07	3.8028e+07	3.73093e+07	3.90606e+07	3.57806e+07	3.80431e+07	3.87165e+07	3.91409e+07	3.66298e+07	3.97266e+07	3.5981e+07	3.6989e+07	5.49779e+07	4.8625e+07	5.25168e+07	---	atr:18423091||http://www.genome.jp/dbget-bin/www_bget?atr:18423091	---
B7FJC3	60S ribosomal protein L18a	11426758	60S ribosomal protein L18a OS=Medicago truncatula OX=3880 GN=11426758 PE=2 SV=1	0	89.206	44	8	97	8	178	21.3	10.3	267.16	0	1	2.12432e+07	1.9988e+07	2.03612e+07	2.09627e+07	2.14455e+07	2.1503e+07	2.18782e+07	2.23732e+07	1.85027e+07	2.13779e+07	1.9792e+07	1.93455e+07	3.72305e+07	3.88399e+07	3.68069e+07	7.82327e+06	8.94602e+06	8.54008e+06	9.0886e+06	9.17539e+06	9.35627e+06	9.53052e+06	9.76638e+06	8.05617e+06	9.93662e+06	9.97427e+06	1.08477e+07	5.16376e+07	4.81035e+07	4.84094e+07	GO:0003735, GO:0005840, GO:0006412	atr:18431451||http://www.genome.jp/dbget-bin/www_bget?atr:18431451	Ribosome
G7I6Q7	3-isopropylmalate dehydratase	11434985	3-isopropylmalate dehydratase OS=Medicago truncatula OX=3880 GN=11434985 PE=4 SV=1	0	89.168	26	13	69	13	505	55	7.23	195.64	0	1	1.90336e+07	1.85704e+07	1.82754e+07	2.41626e+07	2.29422e+07	2.42227e+07	2.42832e+07	2.4408e+07	2.15334e+07	2.36379e+07	2.15059e+07	2.0978e+07	1.97107e+07	2.06078e+07	1.98824e+07	1.66066e+07	2.21223e+07	2.03863e+07	2.52534e+07	2.20227e+07	2.42497e+07	2.32942e+07	2.27849e+07	2.13674e+07	2.17509e+07	2.20938e+07	2.16305e+07	2.45648e+07	2.43126e+07	2.43486e+07	GO:0003861, GO:0008652, GO:0051539, GO:0016836	atr:18444053||http://www.genome.jp/dbget-bin/www_bget?atr:18444053	C5-Branched dibasic acid metabolism
A0A072V371	Subtilisin-like serine protease	25489941	Subtilisin-like serine protease OS=Medicago truncatula OX=3880 GN=25489941 PE=3 SV=1	0	89.047	16	12	39	12	757	80.6	8.02	128.65	0	1	2.71921e+07	2.59712e+07	2.89975e+07	1.76492e+07	1.95877e+07	1.83003e+07	1.8643e+07	1.78875e+07	2.55605e+07	1.8668e+07	2.41837e+07	2.38369e+07	1.32378e+07	1.35858e+07	1.30374e+07	2.49651e+07	2.60756e+07	2.89307e+07	1.77976e+07	2.01128e+07	1.89625e+07	1.84705e+07	1.80427e+07	3.31459e+07	1.7835e+07	2.98212e+07	2.99579e+07	1.17869e+07	1.13345e+07	1.10351e+07	GO:0008236, GO:0004252, GO:0006508	atr:18431819||http://www.genome.jp/dbget-bin/www_bget?atr:18431819	---
G7KGI9	Cinnamyl alcohol dehydrogenase family protein	11411933	Cinnamyl alcohol dehydrogenase family protein OS=Medicago truncatula OX=3880 GN=11411933 PE=3 SV=1	0	88.925	40	11	34	9	363	39	7.74	122.36	3	1	1.18172e+07	1.30027e+07	1.26829e+07	1.2734e+07	1.21132e+07	1.27213e+07	1.15923e+07	1.24154e+07	1.1003e+07	1.1758e+07	1.14077e+07	1.13349e+07	1.4528e+07	1.5195e+07	1.46475e+07	1.11413e+07	1.30305e+07	1.23846e+07	1.38944e+07	1.26742e+07	1.34337e+07	1.26498e+07	1.26372e+07	1.29542e+07	1.21006e+07	1.31638e+07	1.31201e+07	1.81078e+07	1.61503e+07	1.72019e+07	GO:0008270, GO:0016491	atr:105421195||http://www.genome.jp/dbget-bin/www_bget?atr:105421195	Biosynthesis of secondary metabolites
G7LHC6	Tubulin beta chain	11438618	Tubulin beta chain OS=Medicago truncatula OX=3880 GN=11438618 PE=3 SV=1	0	88.838	22	10	65	2	445	49.9	4.94	189.72	0	1	1.01317e+07	9.7112e+06	9.87308e+06	9.85082e+06	1.01806e+07	9.8706e+06	9.65927e+06	9.95135e+06	1.25548e+07	9.97059e+06	1.20625e+07	1.23627e+07	7.53196e+06	7.73579e+06	7.37562e+06	1.10325e+07	9.97151e+06	1.06544e+07	9.13186e+06	1.07746e+07	1.15209e+07	1.1075e+07	1.21105e+07	8.30925e+06	9.83858e+06	8.01095e+06	7.91179e+06	6.7692e+06	7.17135e+06	6.88657e+06	GO:0005874, GO:0003924, GO:0005200, GO:0005525, GO:0007017	atr:18423034||http://www.genome.jp/dbget-bin/www_bget?atr:18423034	Phagosome
G7II78	Pre-mRNA-processing-splicing factor 8	11425902	Pre-mRNA-processing-splicing factor 8 OS=Medicago truncatula OX=3880 GN=11425902 PE=4 SV=2	0	88.589	10	22	54	22	2356	275.5	8.7	133.2	0	1	1.46761e+07	1.44362e+07	1.38334e+07	1.49096e+07	1.55341e+07	1.56654e+07	1.6205e+07	1.56105e+07	1.39752e+07	1.61302e+07	1.45487e+07	1.44544e+07	1.55863e+07	1.60581e+07	1.55641e+07	1.44499e+07	1.4669e+07	1.40763e+07	1.53897e+07	1.59102e+07	1.65779e+07	1.67431e+07	1.64386e+07	1.64998e+07	1.68447e+07	1.62485e+07	1.61741e+07	1.43767e+07	1.45087e+07	1.42293e+07	GO:0003723, GO:0005681, GO:0017070, GO:0000398, GO:0008237, GO:0070122, GO:0005515, GO:0030623	atr:18446319||http://www.genome.jp/dbget-bin/www_bget?atr:18446319	Spliceosome
A0A072UDN7	Arginyl-tRNA synthetase	25496992	Arginyl-tRNA synthetase OS=Medicago truncatula OX=3880 GN=25496992 PE=3 SV=1	0	88.556	19	12	55	8	659	74.4	7.21	172.16	0	1	1.05715e+07	1.15307e+07	1.12251e+07	1.38126e+07	1.412e+07	1.48657e+07	1.47208e+07	1.59144e+07	1.11942e+07	1.41152e+07	1.11743e+07	1.08951e+07	1.26842e+07	1.32261e+07	1.29403e+07	1.23833e+07	1.24617e+07	1.29899e+07	1.35759e+07	1.41848e+07	1.44378e+07	1.44812e+07	1.37216e+07	1.17822e+07	1.42626e+07	1.15548e+07	1.2067e+07	1.24299e+07	1.23093e+07	1.22717e+07	GO:0006420, GO:0000166, GO:0004812, GO:0005524, GO:0004814, GO:0006418, GO:0005737	atr:18443485||http://www.genome.jp/dbget-bin/www_bget?atr:18443485	Aminoacyl-tRNA biosynthesis
A0A396JD84	Putative START-like domain, Bet v I type allergen	MtrunA17_Chr2g0295061	Putative START-like domain, Bet v I type allergen OS=Medicago truncatula OX=3880 GN=MtrunA17_Chr2g0295061 PE=3 SV=1	0	88.542	32	7	56	2	233	25.5	6.79	199.16	5	1	3.28862e+07	3.83529e+07	3.97168e+07	4.50131e+07	4.18434e+07	4.43825e+07	3.92553e+07	4.0036e+07	4.61262e+07	3.81341e+07	4.49268e+07	4.44168e+07	4.42843e+07	3.89863e+07	4.09635e+07	3.72147e+07	4.07809e+07	4.50907e+07	3.82592e+07	3.85361e+07	4.10538e+07	3.63082e+07	3.3404e+07	3.52176e+07	3.57992e+07	3.40851e+07	3.35756e+07	3.88053e+07	4.02128e+07	3.81252e+07	GO:0004864, GO:0010427, GO:0006952, GO:0009738, GO:0038023	atr:18431342||http://www.genome.jp/dbget-bin/www_bget?atr:18431342	---
A0A396HG92	Putative tagatose-bisphosphate aldolase	MtrunA17_Chr6g0478521	Putative tagatose-bisphosphate aldolase OS=Medicago truncatula OX=3880 GN=MtrunA17_Chr6g0478521 PE=3 SV=1	0	88.502	13	17	48	17	1377	147.8	6.58	117.48	0	1	9.79006e+06	1.06555e+07	1.06912e+07	1.04685e+07	9.74331e+06	1.00768e+07	9.86807e+06	9.86635e+06	1.00299e+07	9.95442e+06	1.02424e+07	1.01418e+07	1.21754e+07	1.26391e+07	1.21619e+07	9.75624e+06	9.55614e+06	9.61169e+06	1.03788e+07	1.03295e+07	1.09493e+07	1.10688e+07	1.08358e+07	9.53401e+06	1.0685e+07	9.55179e+06	9.45817e+06	1.12517e+07	1.16082e+07	1.11527e+07	GO:0016832, GO:0016491, GO:0005975, GO:0008270, GO:0051287, GO:0050661, GO:0003824	atr:18428679||http://www.genome.jp/dbget-bin/www_bget?atr:18428679	---
B7FK19	14_3_3 domain-containing protein		14_3_3 domain-containing protein OS=Medicago truncatula OX=3880 PE=2 SV=1	0	88.407	43	11	67	10	252	28.3	4.79	224.27	0	1	1.82444e+07	1.88273e+07	1.83226e+07	2.16545e+07	2.10253e+07	2.26952e+07	2.20886e+07	2.12711e+07	2.19514e+07	2.20075e+07	2.12717e+07	2.17416e+07	3.0357e+07	2.56699e+07	2.83308e+07	1.85658e+07	2.05108e+07	2.01306e+07	2.21591e+07	2.16355e+07	2.32408e+07	2.2045e+07	2.20384e+07	2.30819e+07	2.16362e+07	2.21379e+07	2.27783e+07	2.71499e+07	2.46429e+07	2.53742e+07	---	atr:18431035||http://www.genome.jp/dbget-bin/www_bget?atr:18431035	---
G7JB35	DEAD-box ATP-dependent RNA helicase-like protein	11431965	DEAD-box ATP-dependent RNA helicase-like protein OS=Medicago truncatula OX=3880 GN=11431965 PE=4 SV=1	0	88.39	33	12	46	4	427	48.3	5.74	149.71	0	1	5.28386e+06	3.62345e+06	4.31906e+06	2.05964e+06	2.9439e+06	2.29209e+06	2.21634e+06	2.34675e+06	1.99559e+06	2.06456e+06	2.02812e+06	1.85389e+06	1.71015e+06	1.88541e+06	1.87276e+06	3.88845e+06	2.8768e+06	3.55083e+06	2.20904e+06	2.23263e+06	2.31303e+06	2.08436e+06	2.58945e+06	2.2218e+06	2.33316e+06	2.19488e+06	2.26191e+06	2.38582e+06	2.38043e+06	2.46186e+06	GO:0005524, GO:0003724, GO:0003676	atr:18443738||http://www.genome.jp/dbget-bin/www_bget?atr:18443738	mRNA surveillance pathway
G7I3B2	Chorismate synthase	11417820	Chorismate synthase OS=Medicago truncatula OX=3880 GN=11417820 PE=3 SV=2	0	88.258	28	14	55	14	436	47.5	8.27	146.48	0	1	1.7455e+07	1.62606e+07	1.64188e+07	1.74187e+07	1.81399e+07	1.82334e+07	1.92209e+07	1.85543e+07	1.68382e+07	1.95608e+07	1.66124e+07	1.71605e+07	2.60425e+07	2.7086e+07	2.57137e+07	1.70051e+07	1.72568e+07	1.67715e+07	1.70559e+07	1.78249e+07	1.84508e+07	1.82945e+07	1.83659e+07	1.72892e+07	1.95832e+07	1.73098e+07	1.78752e+07	2.69746e+07	2.79646e+07	2.65636e+07	GO:0009073, GO:0004107	atr:18444261||http://www.genome.jp/dbget-bin/www_bget?atr:18444261	Phenylalanine, tyrosine and tryptophan biosynthesis
A0A072TLC8	Carboxypeptidase	25479425	Carboxypeptidase OS=Medicago truncatula OX=3880 GN=25479425 PE=3 SV=1	0	87.978	22	12	82	12	493	55.5	7.59	249.51	0	1	2.41838e+08	1.7373e+08	2.1024e+08	9.75186e+07	1.24652e+08	1.09642e+08	1.12704e+08	1.13173e+08	1.08465e+08	1.09223e+08	1.01529e+08	1.01739e+08	4.8304e+07	4.91945e+07	4.96796e+07	2.20572e+08	1.75341e+08	1.9542e+08	1.0556e+08	1.22902e+08	1.15587e+08	1.16364e+08	1.18169e+08	1.20481e+08	1.16378e+08	1.11586e+08	1.13888e+08	5.66071e+07	5.7116e+07	5.70895e+07	GO:0004185, GO:0006508	atr:18442798||http://www.genome.jp/dbget-bin/www_bget?atr:18442798	---
I3SZ22	Putative bulb-type lectin domain-containing protein	MtrunA17_Chr2g0315841	Putative bulb-type lectin domain-containing protein OS=Medicago truncatula OX=3880 GN=MtrunA17_Chr2g0315841 PE=2 SV=1	0	87.943	24	10	66	10	436	49	6.44	205.19	0	1	7.1654e+07	5.62935e+07	6.81797e+07	3.65313e+07	4.28987e+07	3.94499e+07	3.88119e+07	3.73709e+07	5.71109e+07	3.86548e+07	5.26103e+07	5.32505e+07	3.12506e+07	3.1767e+07	3.07074e+07	6.85052e+07	6.40971e+07	7.41658e+07	3.73564e+07	4.45393e+07	4.2133e+07	4.00642e+07	3.75631e+07	7.27488e+07	3.72704e+07	6.24035e+07	6.0581e+07	2.97267e+07	3.0212e+07	2.97175e+07	---	atr:18429478||http://www.genome.jp/dbget-bin/www_bget?atr:18429478	---
A0A072UNM0	60S ribosomal protein L3B	25493328	60S ribosomal protein L3B OS=Medicago truncatula OX=3880 GN=25493328 PE=3 SV=1	0	87.903	36	16	144	7	389	44.5	10.18	407.28	0	1	1.93084e+07	1.27057e+07	1.53856e+07	7.05132e+06	8.79335e+06	7.08692e+06	8.3436e+06	7.74442e+06	7.03068e+06	7.9884e+06	7.01891e+06	6.97417e+06	9.15288e+06	9.74141e+06	9.21783e+06	1.31293e+07	1.13943e+07	1.23881e+07	9.16399e+06	9.91422e+06	9.47559e+06	9.78753e+06	9.48925e+06	1.03683e+07	9.70488e+06	9.83646e+06	1.03396e+07	9.7888e+06	1.00508e+07	9.89523e+06	GO:0005840, GO:0003735, GO:0006412	atr:18423839||http://www.genome.jp/dbget-bin/www_bget?atr:18423839	Ribosome
G7LEB3	Carboxypeptidase	11421994	Carboxypeptidase OS=Medicago truncatula OX=3880 GN=11421994 PE=2 SV=1	0	87.761	15	7	80	7	495	55.1	6	233.44	0	1	8.71051e+07	6.05859e+07	7.6449e+07	3.88312e+07	4.35641e+07	4.03746e+07	3.78594e+07	3.74512e+07	4.01397e+07	3.77272e+07	3.96427e+07	3.9703e+07	3.01575e+07	3.11553e+07	3.0314e+07	8.62497e+07	5.67317e+07	7.47588e+07	3.64791e+07	4.43378e+07	4.06451e+07	3.92159e+07	3.90591e+07	3.61353e+07	3.76429e+07	3.58063e+07	3.57892e+07	2.81229e+07	2.90237e+07	2.90652e+07	GO:0006508, GO:0004185	atr:18437197||http://www.genome.jp/dbget-bin/www_bget?atr:18437197	---
G7IDU4	Protein disulfide-isomerase	11412950	Protein disulfide-isomerase OS=Medicago truncatula OX=3880 GN=11412950 PE=3 SV=2	0	87.482	38	14	46	11	364	40.4	5.49	137.74	2	1	1.71547e+07	1.7453e+07	1.76193e+07	1.97444e+07	2.04773e+07	2.11137e+07	2.18555e+07	2.13027e+07	1.97479e+07	2.2227e+07	2.01054e+07	2.10118e+07	4.48768e+07	4.23994e+07	4.17789e+07	1.71138e+07	1.86248e+07	1.81643e+07	2.1561e+07	2.13864e+07	2.26723e+07	2.4405e+07	2.42737e+07	2.26636e+07	2.32141e+07	2.30595e+07	2.36857e+07	4.37581e+07	3.6693e+07	3.90841e+07	GO:0005783, GO:0003756	atr:18445105||http://www.genome.jp/dbget-bin/www_bget?atr:18445105	Protein processing in endoplasmic reticulum
A0A396JH34	Eukaryotic translation initiation factor 3 subunit C	MtrunA17_Chr1g0155771	Eukaryotic translation initiation factor 3 subunit C OS=Medicago truncatula OX=3880 GN=MtrunA17_Chr1g0155771 PE=3 SV=1	0	87.406	17	15	53	1	935	105	5.77	169.24	14	1	1.87552e+07	1.92919e+07	1.97297e+07	2.07692e+07	1.96307e+07	2.08628e+07	1.9556e+07	1.88666e+07	1.49727e+07	1.83817e+07	1.5554e+07	1.52694e+07	1.84997e+07	2.01266e+07	1.83754e+07	1.93171e+07	1.98174e+07	2.00625e+07	2.02099e+07	1.96055e+07	2.12831e+07	1.81003e+07	1.7922e+07	1.70867e+07	1.75638e+07	1.70031e+07	1.69014e+07	2.01827e+07	1.87363e+07	2.01811e+07	GO:0031369, GO:0003723, GO:0006413, GO:0003743, GO:0005852	atr:18435700||http://www.genome.jp/dbget-bin/www_bget?atr:18435700	RNA transport
B7FNA0	Uncharacterized protein		Uncharacterized protein OS=Medicago truncatula OX=3880 PE=2 SV=1	0	87.314	25	12	91	11	510	54.8	6.21	249.09	2	1	3.77791e+07	3.83917e+07	3.92156e+07	4.64568e+07	4.57308e+07	5.07887e+07	4.74977e+07	4.75944e+07	3.30035e+07	4.55151e+07	3.45809e+07	3.48337e+07	6.06228e+07	5.40019e+07	5.63323e+07	4.21885e+07	4.2363e+07	4.35462e+07	4.61368e+07	4.72174e+07	5.17357e+07	4.60104e+07	4.70204e+07	3.45307e+07	4.43517e+07	3.60919e+07	3.65977e+07	6.11627e+07	5.75469e+07	5.91302e+07	GO:0046872, GO:0006508, GO:0004222	atr:18443492||http://www.genome.jp/dbget-bin/www_bget?atr:18443492	---
G7KZW8	Aldose 1-epimerase	11427981	Aldose 1-epimerase OS=Medicago truncatula OX=3880 GN=11427981 PE=3 SV=1	0	87.25	26	9	79	9	362	39.7	9.48	235.64	0	1	9.72749e+07	7.07717e+07	7.90791e+07	4.95128e+07	5.91483e+07	5.06385e+07	5.00082e+07	5.35131e+07	3.90112e+07	4.75131e+07	4.00256e+07	3.78148e+07	2.98452e+07	3.14049e+07	3.13032e+07	1.07608e+08	6.57528e+07	7.70946e+07	4.37758e+07	5.91643e+07	5.15116e+07	5.2905e+07	5.51539e+07	3.79809e+07	5.09834e+07	3.8423e+07	3.64378e+07	2.21162e+07	2.31765e+07	2.37035e+07	GO:0003824, GO:0016853, GO:0019318, GO:0030246, GO:0005975	atr:18422407||http://www.genome.jp/dbget-bin/www_bget?atr:18422407	Galactose metabolism
B7FLW8	40S ribosomal protein S3a	25485157	40S ribosomal protein S3a OS=Medicago truncatula OX=3880 GN=25485157 PE=2 SV=1	0	87.205	52	14	91	3	261	29.7	9.82	226.65	0	1	894965	848357	886583	907328	991543	986886	1.24984e+06	1.15846e+06	1.40047e+06	1.14639e+06	1.29517e+06	1.34172e+06	868678	899021	852114	820604	800938	832173	856236	904071	847703	1.20674e+06	1.13051e+06	2.17107e+06	1.26497e+06	1.80168e+06	1.99624e+06	762843	763204	789733	GO:0005840, GO:0003735, GO:0006412	atr:18438511||http://www.genome.jp/dbget-bin/www_bget?atr:18438511	Ribosome
G7I8F2	Long-chain fatty acyl CoA ligase, putative	11409239	Long-chain fatty acyl CoA ligase, putative OS=Medicago truncatula OX=3880 GN=11409239 PE=4 SV=1	0	87.069	14	9	44	6	696	76.3	7.12	126.02	2	1	1.88897e+07	1.90245e+07	1.90503e+07	2.14521e+07	2.32575e+07	2.51794e+07	2.38532e+07	2.37881e+07	2.25103e+07	2.46199e+07	2.20271e+07	2.14562e+07	2.16041e+07	2.25321e+07	2.17047e+07	1.8343e+07	1.97709e+07	1.97213e+07	2.21887e+07	2.52194e+07	2.72028e+07	2.59165e+07	2.42839e+07	2.49323e+07	2.38082e+07	2.50442e+07	2.35035e+07	2.20086e+07	1.98798e+07	2.09766e+07	---	atr:18436747||http://www.genome.jp/dbget-bin/www_bget?atr:18436747	Fatty acid biosynthesis
A0A072TYM4	60S ribosomal protein L7a	25497747	60S ribosomal protein L7a OS=Medicago truncatula OX=3880 GN=25497747 PE=3 SV=1	0	87.069	52	18	90	7	260	29.5	10.27	253.67	0	1	1.98836e+07	2.27683e+07	2.14936e+07	2.06974e+07	1.89394e+07	2.00193e+07	1.80591e+07	1.73105e+07	2.71834e+07	1.85874e+07	2.77446e+07	2.67219e+07	3.47766e+07	3.03264e+07	3.17308e+07	1.80142e+07	2.02746e+07	1.98743e+07	1.86895e+07	1.77445e+07	1.79291e+07	1.71325e+07	1.76844e+07	2.00388e+07	1.74573e+07	2.00752e+07	2.0463e+07	4.16917e+07	3.30537e+07	4.03879e+07	GO:1990904, GO:0042254	atr:18434474||http://www.genome.jp/dbget-bin/www_bget?atr:18434474	Ribosome
A0A072V8I1	UDP-arabinopyranose mutase	25488435	UDP-arabinopyranose mutase OS=Medicago truncatula OX=3880 GN=25488435 PE=3 SV=1	0	87.013	27	11	87	6	359	41	5.96	254.03	0	1	2.88363e+07	1.99519e+07	2.23683e+07	1.46707e+07	1.66825e+07	1.66465e+07	1.8728e+07	1.80446e+07	2.15291e+07	1.87819e+07	2.03563e+07	2.02959e+07	1.21174e+07	1.23418e+07	1.22063e+07	3.50138e+07	2.27439e+07	2.61125e+07	1.30154e+07	1.5747e+07	1.49457e+07	1.66969e+07	1.59581e+07	2.3061e+07	1.71056e+07	2.04587e+07	2.06807e+07	1.09469e+07	1.09829e+07	1.13415e+07	GO:0016866, GO:0071669	atr:18446216||http://www.genome.jp/dbget-bin/www_bget?atr:18446216	Amino sugar and nucleotide sugar metabolism
G7K1D4	Carbonic anhydrase	11407419	Carbonic anhydrase OS=Medicago truncatula OX=3880 GN=11407419 PE=3 SV=1	0	86.883	33	8	35	7	278	30.4	6.54	111.74	0	1	9.65698e+06	1.14105e+07	1.04118e+07	1.40318e+07	1.39209e+07	1.47389e+07	1.16187e+07	1.18183e+07	1.15461e+07	1.23741e+07	1.2065e+07	1.22539e+07	1.95622e+07	1.87312e+07	1.92988e+07	1.10048e+07	1.15909e+07	1.11277e+07	1.22506e+07	1.1844e+07	1.22632e+07	1.18458e+07	1.22749e+07	1.28107e+07	1.18395e+07	1.30795e+07	1.3265e+07	2.09337e+07	1.97393e+07	2.1285e+07	GO:0008270, GO:0015976, GO:0004089	atr:18434862||http://www.genome.jp/dbget-bin/www_bget?atr:18434862	Nitrogen metabolism
A0A072TQ67	Malate dehydrogenase	25502524	Malate dehydrogenase OS=Medicago truncatula OX=3880 GN=25502524 PE=3 SV=1	0	86.858	29	7	35	6	343	35.8	8.47	123.47	1	1	2.24856e+07	3.27988e+07	3.07831e+07	4.9045e+07	3.39465e+07	4.27766e+07	3.72892e+07	3.92023e+07	2.72457e+07	3.45976e+07	3.14857e+07	3.05932e+07	8.02388e+07	5.95772e+07	7.05237e+07	2.43544e+07	2.33414e+07	2.31199e+07	2.91867e+07	3.31296e+07	3.26003e+07	3.28329e+07	3.26059e+07	2.56747e+07	3.33465e+07	2.71068e+07	2.76027e+07	7.22161e+07	7.23645e+07	7.13768e+07	GO:0003824, GO:0006099, GO:0006108, GO:0016615, GO:0016616, GO:0030060, GO:0005975, GO:0016491, GO:0019752	atr:18442196||http://www.genome.jp/dbget-bin/www_bget?atr:18442196	Citrate cycle (TCA cycle)
G7JKW2	MAR-binding filament-like protein, putative	11445122	MAR-binding filament-like protein, putative OS=Medicago truncatula OX=3880 GN=11445122 PE=4 SV=1	0	86.609	23	16	51	16	768	86.7	5.48	143.39	0	1	1.79744e+07	1.76972e+07	1.73742e+07	1.92128e+07	1.80235e+07	1.90611e+07	1.73938e+07	1.80083e+07	1.66026e+07	1.78429e+07	1.71865e+07	1.67985e+07	2.26567e+07	2.31362e+07	2.30842e+07	1.69838e+07	1.78283e+07	1.68241e+07	2.01577e+07	1.85952e+07	2.01755e+07	1.76426e+07	1.88188e+07	1.64169e+07	1.8603e+07	1.70632e+07	1.65939e+07	2.24335e+07	2.29769e+07	2.26391e+07	---	atr:18434210||http://www.genome.jp/dbget-bin/www_bget?atr:18434210	---
A0A072VHE7	Carboxypeptidase	25483270	Carboxypeptidase OS=Medicago truncatula OX=3880 GN=25483270 PE=3 SV=1	0	86.54	17	9	78	9	496	55.1	5.58	216.07	0	1	7.72919e+07	7.37052e+07	7.72712e+07	6.07964e+07	6.20978e+07	6.00852e+07	6.39363e+07	6.38425e+07	9.44994e+07	6.49753e+07	9.01366e+07	8.61967e+07	3.96424e+07	4.07001e+07	4.15461e+07	8.70043e+07	6.89709e+07	7.24262e+07	5.55731e+07	6.05466e+07	5.6514e+07	6.43916e+07	6.21878e+07	9.34703e+07	6.77684e+07	8.32015e+07	8.59875e+07	3.36936e+07	3.52132e+07	3.68128e+07	GO:0006508, GO:0004185	atr:18441094||http://www.genome.jp/dbget-bin/www_bget?atr:18441094	---
G7K6H8	Chromosome region maintenance protein 1/exportin	11435528	Chromosome region maintenance protein 1/exportin OS=Medicago truncatula OX=3880 GN=11435528 PE=3 SV=2	0	86.521	11	12	49	6	1078	123.8	5.71	124.75	11	1	7.94598e+06	1.00245e+07	9.72982e+06	1.11142e+07	9.56149e+06	1.02295e+07	9.79674e+06	9.72606e+06	1.12143e+07	1.03161e+07	1.15221e+07	1.16483e+07	1.07782e+07	1.11453e+07	1.0664e+07	7.95623e+06	8.61257e+06	8.34495e+06	1.00522e+07	9.04596e+06	9.70586e+06	1.01658e+07	9.94092e+06	1.18752e+07	1.173e+07	1.22331e+07	1.11582e+07	1.02388e+07	9.27398e+06	1.01348e+07	GO:0005049, GO:0006611, GO:0031267, GO:0006886	atr:18448035||http://www.genome.jp/dbget-bin/www_bget?atr:18448035	Ribosome biogenesis in eukaryotes
A0A396GJX8	Putative UDP-glucose 4,6-dehydratase	MtrunA17_Chr8g0359401	Putative UDP-glucose 4,6-dehydratase OS=Medicago truncatula OX=3880 GN=MtrunA17_Chr8g0359401 PE=4 SV=1	0	86.49	26	16	50	7	668	75	7.25	130.9	0	1	5.75904e+06	5.56185e+06	5.63132e+06	5.47287e+06	5.89965e+06	6.04668e+06	6.03005e+06	5.97297e+06	5.69959e+06	5.87816e+06	5.70224e+06	5.65715e+06	5.90339e+06	6.08773e+06	5.81248e+06	5.42934e+06	4.70908e+06	5.0309e+06	5.41269e+06	6.26309e+06	6.41961e+06	6.76483e+06	6.73106e+06	5.63189e+06	6.49729e+06	5.65126e+06	5.49073e+06	5.2808e+06	5.40974e+06	5.17533e+06	GO:0008460, GO:0009225	atr:18435387||http://www.genome.jp/dbget-bin/www_bget?atr:18435387	Amino sugar and nucleotide sugar metabolism
I3RZQ6	Proteasome subunit alpha type	25482164	Proteasome subunit alpha type OS=Medicago truncatula OX=3880 GN=25482164 PE=2 SV=1	0	86.465	40	11	49	7	284	30.9	5.27	139.83	4	1	2.03022e+07	2.06711e+07	2.168e+07	1.84363e+07	1.79545e+07	1.78198e+07	1.74374e+07	1.72093e+07	1.61698e+07	1.72861e+07	1.69058e+07	1.73915e+07	2.40815e+07	2.51925e+07	2.43514e+07	2.04623e+07	2.11371e+07	2.17203e+07	1.89107e+07	1.88892e+07	2.0115e+07	1.90165e+07	1.92909e+07	1.94722e+07	1.88167e+07	1.83136e+07	1.87985e+07	2.13766e+07	2.20514e+07	2.15495e+07	GO:0051603, GO:0006511, GO:0005839, GO:0019773	atr:18431353||http://www.genome.jp/dbget-bin/www_bget?atr:18431353	Proteasome
G7J5U6	26S proteasome non-ATPase regulatory subunit 3	11439915	26S proteasome non-ATPase regulatory subunit 3 OS=Medicago truncatula OX=3880 GN=11439915 PE=3 SV=1	0	86.426	35	15	57	5	490	55.7	8.57	157.41	11	1	2.39451e+07	2.45349e+07	2.4423e+07	2.48747e+07	2.45235e+07	2.51737e+07	2.55808e+07	2.53466e+07	2.71623e+07	2.49928e+07	2.74232e+07	2.71794e+07	2.65418e+07	2.71654e+07	2.64397e+07	2.4448e+07	2.47519e+07	2.5397e+07	2.54081e+07	2.34685e+07	2.48835e+07	2.33917e+07	2.35145e+07	2.70169e+07	2.41811e+07	2.6538e+07	2.67481e+07	2.5349e+07	2.58263e+07	2.53406e+07	GO:0000502, GO:0042176, GO:0030234	atr:18445313||http://www.genome.jp/dbget-bin/www_bget?atr:18445313	Proteasome
G7L1J6	Polynucleotide phosphorylase 1	11438450	Polynucleotide phosphorylase 1 OS=Medicago truncatula OX=3880 GN=11438450 PE=3 SV=2	0	86.386	24	19	59	19	926	100.8	6.27	167.03	0	1	2.01536e+07	1.88533e+07	1.90474e+07	2.18829e+07	2.38322e+07	2.46845e+07	2.54228e+07	2.67975e+07	1.92853e+07	2.52078e+07	1.98616e+07	1.98811e+07	3.41334e+07	3.55403e+07	3.38193e+07	2.16183e+07	2.0629e+07	2.0492e+07	2.43051e+07	2.63845e+07	2.74348e+07	2.75603e+07	2.78956e+07	2.19726e+07	2.71062e+07	2.22997e+07	2.21504e+07	3.2845e+07	3.41255e+07	3.28761e+07	GO:0006402, GO:0003723, GO:0003676, GO:0004654, GO:0006396	atr:18421647||http://www.genome.jp/dbget-bin/www_bget?atr:18421647	RNA degradation
A0A072V507	Lactoylglutathione lyase	25486173	Lactoylglutathione lyase OS=Medicago truncatula OX=3880 GN=25486173 PE=3 SV=1	0	86.33	27	7	49	6	287	32.1	5.59	165.74	2	1	7.42625e+07	6.17369e+07	7.42573e+07	1.95521e+07	2.29813e+07	1.68709e+07	1.65743e+07	1.6454e+07	1.6888e+07	1.66013e+07	1.83697e+07	1.81875e+07	2.3278e+07	2.42055e+07	2.34661e+07	5.68484e+07	5.75322e+07	7.00386e+07	1.78445e+07	2.72605e+07	2.10912e+07	2.45744e+07	2.57e+07	1.71947e+07	2.39642e+07	1.76856e+07	1.7025e+07	2.60483e+07	2.60894e+07	2.61261e+07	GO:0046872, GO:0004462	atr:18445735||http://www.genome.jp/dbget-bin/www_bget?atr:18445735	Metabolic pathways
G7JI82	Bacterial long-chain fatty acid CoA synthetase	11436555	Bacterial long-chain fatty acid CoA synthetase OS=Medicago truncatula OX=3880 GN=11436555 PE=4 SV=1	0	86.302	20	13	53	12	727	79.4	7.49	138.29	1	1	2.14379e+07	2.17251e+07	2.18709e+07	2.26801e+07	2.39835e+07	2.39489e+07	2.26495e+07	2.29042e+07	3.06565e+07	2.24038e+07	2.94363e+07	2.97472e+07	2.01294e+07	2.08672e+07	1.99631e+07	2.63402e+07	2.66798e+07	2.83798e+07	2.1966e+07	2.36761e+07	2.29395e+07	2.228e+07	2.19151e+07	3.56399e+07	2.17089e+07	3.3962e+07	3.26756e+07	1.77852e+07	1.81426e+07	1.77083e+07	---	atr:18447598||http://www.genome.jp/dbget-bin/www_bget?atr:18447598	Fatty acid biosynthesis
Q5QQ33	ADP-ribosylation factor	arf1	ADP-ribosylation factor OS=Medicago truncatula OX=3880 GN=arf1 PE=2 SV=1	0	86.133	34	5	72	1	181	20.7	6.95	237.85	0	1	8.69053e+06	1.09863e+07	1.047e+07	1.37047e+07	1.16633e+07	1.26045e+07	9.95007e+06	1.05173e+07	1.03294e+07	9.6958e+06	1.09822e+07	1.07449e+07	1.26656e+07	1.32119e+07	1.2841e+07	8.85951e+06	1.13845e+07	1.169e+07	1.26243e+07	9.85015e+06	1.15114e+07	9.72134e+06	9.16499e+06	1.10245e+07	8.88517e+06	1.1168e+07	1.09376e+07	1.27063e+07	1.28969e+07	1.26797e+07	GO:0003924, GO:0005525	atr:18430511||http://www.genome.jp/dbget-bin/www_bget?atr:18430511	Endocytosis
G7IUC4	ADP/ATP translocase	11432918	ADP/ATP translocase OS=Medicago truncatula OX=3880 GN=11432918 PE=3 SV=1	0	86.104	20	8	80	2	362	39.3	9.83	219.78	0	1	874749	756293	759658	718813	787654	803233	776822	717394	612874	808377	600575	677647	752019	752024	717934	756342	877081	802131	893773	842272	848345	830686	827471	871349	843601	903517	910963	868739	865899	903599	GO:0055085, GO:0140021, GO:0005471, GO:0005743, GO:1990544	atr:18445032||http://www.genome.jp/dbget-bin/www_bget?atr:18445032	---
G7J8L6	50S ribosomal protein L3P	11419287	50S ribosomal protein L3P OS=Medicago truncatula OX=3880 GN=11419287 PE=3 SV=1	0	85.948	42	9	56	9	272	29.5	10.54	157.23	0	1	1.01763e+07	1.15669e+07	1.04902e+07	1.12673e+07	9.99617e+06	1.00546e+07	1.15864e+07	1.09009e+07	1.36454e+07	1.28663e+07	1.40192e+07	1.41627e+07	2.82002e+07	2.016e+07	2.53687e+07	1.0551e+07	1.38272e+07	1.1466e+07	1.20626e+07	1.00871e+07	1.07961e+07	1.02663e+07	1.55752e+07	1.10817e+07	1.12254e+07	1.22521e+07	1.22704e+07	3.43877e+07	1.96017e+07	2.76302e+07	GO:0006412, GO:0003735, GO:0005840	atr:18431355||http://www.genome.jp/dbget-bin/www_bget?atr:18431355	Ribosome
G7KAG7	Putative L-ascorbate peroxidase	11437370	Putative L-ascorbate peroxidase OS=Medicago truncatula OX=3880 GN=11437370 PE=3 SV=1	0	85.909	42	16	108	15	353	38.9	8.09	262.46	1	1	1.05212e+08	1.42138e+08	1.25144e+08	1.82092e+08	1.11661e+08	1.19649e+08	1.25231e+08	1.21831e+08	1.27638e+08	1.20914e+08	1.49147e+08	1.39732e+08	1.74696e+08	1.8313e+08	1.83961e+08	1.08038e+08	1.17251e+08	1.17381e+08	1.18906e+08	1.137e+08	1.17511e+08	1.22048e+08	1.23395e+08	9.90936e+07	1.20009e+08	1.03393e+08	1.01001e+08	1.37131e+08	1.39542e+08	1.3675e+08	GO:0020037, GO:0034599, GO:0006979, GO:0004601	atr:18443982||http://www.genome.jp/dbget-bin/www_bget?atr:18443982	Ascorbate and aldarate metabolism
G7JJJ6	Non-specific lipid-transfer protein	11434678	Non-specific lipid-transfer protein OS=Medicago truncatula OX=3880 GN=11434678 PE=3 SV=1	0	85.797	43	6	171	3	117	11.8	9.07	478.34	6	1	9.45591e+07	9.39296e+07	9.1935e+07	1.20896e+08	1.28628e+08	1.30298e+08	1.34022e+08	1.43982e+08	1.33299e+08	1.37374e+08	1.24005e+08	1.26885e+08	5.7849e+07	5.70034e+07	5.72893e+07	7.96034e+07	1.07756e+08	9.88451e+07	1.52723e+08	1.34979e+08	1.44833e+08	1.56277e+08	1.44414e+08	1.66471e+08	1.57647e+08	1.52358e+08	1.47345e+08	5.51978e+07	5.59951e+07	6.08754e+07	GO:0008289, GO:0006869	atr:18432295||http://www.genome.jp/dbget-bin/www_bget?atr:18432295	---
G7K4Y9	Aldo/keto reductase family oxidoreductase	11419649	Aldo/keto reductase family oxidoreductase OS=Medicago truncatula OX=3880 GN=11419649 PE=2 SV=1	0	85.724	38	11	94	9	312	34.9	6.33	293.94	1	1	4.54383e+07	5.13537e+07	5.10339e+07	5.84377e+07	5.64176e+07	6.17324e+07	5.73509e+07	5.63756e+07	4.52823e+07	5.32114e+07	4.58062e+07	4.55947e+07	4.88813e+07	4.99733e+07	4.94373e+07	4.97239e+07	5.11255e+07	5.26895e+07	5.60567e+07	5.75742e+07	6.10145e+07	5.28342e+07	5.43478e+07	4.85591e+07	5.1403e+07	4.80896e+07	4.85471e+07	4.86538e+07	4.9851e+07	4.83381e+07	GO:0016491, GO:0016616, GO:0047834	atr:18439246||http://www.genome.jp/dbget-bin/www_bget?atr:18439246	---
G7L9H3	NAD-dependent isocitrate dehydrogenase	11442733	NAD-dependent isocitrate dehydrogenase OS=Medicago truncatula OX=3880 GN=11442733 PE=3 SV=1	0	85.578	30	10	57	6	367	39.7	6.62	189.1	5	1	3.89695e+07	3.66557e+07	3.87774e+07	3.71985e+07	4.23661e+07	4.23778e+07	4.19082e+07	4.06578e+07	3.45967e+07	3.87976e+07	3.43734e+07	3.45895e+07	3.44778e+07	3.60419e+07	3.37635e+07	3.60785e+07	3.48728e+07	3.81022e+07	3.67859e+07	4.29642e+07	4.40255e+07	4.16354e+07	4.56624e+07	3.51561e+07	3.90204e+07	3.33981e+07	3.3147e+07	3.14483e+07	3.18615e+07	3.16378e+07	GO:0006099, GO:0004449, GO:0016616	atr:18441411||http://www.genome.jp/dbget-bin/www_bget?atr:18441411	2-Oxocarboxylic acid metabolism
I3T063	60S ribosomal protein L7a	25492826	60S ribosomal protein L7a OS=Medicago truncatula OX=3880 GN=25492826 PE=2 SV=1	0	85.438	49	18	86	7	259	29.5	10.18	237.62	13	1	2.5853e+07	3.21758e+07	2.88637e+07	3.33581e+07	2.9831e+07	2.9704e+07	3.04339e+07	3.01363e+07	3.26008e+07	3.07279e+07	3.59399e+07	3.68358e+07	9.41911e+07	8.15335e+07	9.44052e+07	3.21757e+07	3.28229e+07	3.17042e+07	3.09672e+07	2.93929e+07	3.12842e+07	2.9001e+07	2.93827e+07	3.1557e+07	3.03228e+07	3.34732e+07	3.43155e+07	7.47119e+07	6.11966e+07	7.12819e+07	GO:1990904, GO:0042254	atr:18434474||http://www.genome.jp/dbget-bin/www_bget?atr:18434474	Ribosome
Q93YX8	Phosphoinositide phospholipase C	PLC1	Phosphoinositide phospholipase C OS=Medicago truncatula OX=3880 GN=PLC1 PE=4 SV=1	0	85.399	25	17	70	4	593	67.4	6.37	178.84	17	1	5.40355e+07	5.0705e+07	5.29565e+07	3.91687e+07	3.96489e+07	3.68286e+07	3.85692e+07	3.79137e+07	3.56064e+07	3.80309e+07	3.82058e+07	3.8752e+07	6.27862e+07	6.38063e+07	6.34186e+07	5.32166e+07	5.27204e+07	5.32193e+07	4.36497e+07	4.30604e+07	4.24069e+07	4.08811e+07	4.24129e+07	4.14645e+07	4.30566e+07	4.46142e+07	4.41235e+07	5.5152e+07	5.57057e+07	5.63194e+07	GO:0008081, GO:0006629, GO:0007165, GO:0004435, GO:0035556	atr:18433394||http://www.genome.jp/dbget-bin/www_bget?atr:18433394	AGE-RAGE signaling pathway in diabetic complications
Q1RU62	Histone H4	25492460	Histone H4 OS=Medicago truncatula OX=3880 GN=25492460 PE=2 SV=1	0	85.366	52	7	236	7	103	11.4	11.47	687.14	0	1	1.47494e+08	1.61224e+08	1.64668e+08	1.61862e+08	1.50501e+08	1.62624e+08	1.6376e+08	1.59923e+08	1.37542e+08	1.63325e+08	1.6149e+08	1.52204e+08	4.23929e+08	4.25447e+08	4.02692e+08	1.56882e+08	1.62856e+08	1.63214e+08	1.59765e+08	1.56124e+08	1.67518e+08	1.69297e+08	1.72444e+08	1.23179e+08	1.68871e+08	1.44493e+08	1.49528e+08	4.14896e+08	3.74214e+08	3.8254e+08	GO:0003677, GO:0046982, GO:0000786	atr:18443072||http://www.genome.jp/dbget-bin/www_bget?atr:18443072	---
A0A072U6Q1	Ribulose bisphosphate carboxylase small subunit	25497418	Ribulose bisphosphate carboxylase small subunit OS=Medicago truncatula OX=3880 GN=25497418 PE=3 SV=1	0	85.347	46	10	384	7	181	20.2	8.81	965.35	5	1	3.88317e+09	4.52764e+09	4.33613e+09	7.44078e+09	7.21021e+09	8.2177e+09	9.33803e+09	8.82784e+09	5.62887e+09	8.9062e+09	5.57608e+09	5.83336e+09	7.52483e+09	7.73458e+09	7.3002e+09	4.10041e+09	4.57229e+09	4.40554e+09	7.65726e+09	7.69197e+09	8.69044e+09	9.41037e+09	9.45206e+09	5.98027e+09	9.08247e+09	5.79527e+09	5.93905e+09	7.39981e+09	7.64063e+09	7.32243e+09	---	atr:18432099||http://www.genome.jp/dbget-bin/www_bget?atr:18432099	Glyoxylate and dicarboxylate metabolism
D7RIC7	Non-reducing end alpha-L-arabinofuranosidase	Araf1	Non-reducing end alpha-L-arabinofuranosidase OS=Medicago truncatula OX=3880 GN=Araf1 PE=2 SV=1	0	85.106	20	11	71	11	672	74	5.52	207.28	0	1	7.01586e+07	6.02287e+07	7.17273e+07	2.74236e+07	2.89998e+07	2.24036e+07	2.25954e+07	2.22328e+07	2.67981e+07	2.2372e+07	2.73523e+07	2.68675e+07	2.59409e+07	2.65634e+07	2.55588e+07	7.12005e+07	6.76475e+07	7.8861e+07	2.41133e+07	2.63223e+07	2.04231e+07	2.00011e+07	1.87632e+07	2.74118e+07	2.00301e+07	2.70395e+07	2.71689e+07	2.33899e+07	2.38474e+07	2.3314e+07	GO:0016798, GO:0046373, GO:0046556	atr:18426249||http://www.genome.jp/dbget-bin/www_bget?atr:18426249	Amino sugar and nucleotide sugar metabolism
A0A072W2M8	Beta-hexosaminidase	25485726	Beta-hexosaminidase OS=Medicago truncatula OX=3880 GN=25485726 PE=3 SV=1	0	85.059	26	14	62	12	536	60.9	8	171.18	2	1	7.07605e+07	5.46708e+07	6.07939e+07	3.71503e+07	4.23419e+07	3.89608e+07	4.21473e+07	4.2453e+07	4.42087e+07	4.21028e+07	4.1864e+07	4.22495e+07	2.39116e+07	2.42918e+07	2.38291e+07	6.77247e+07	5.51031e+07	6.13331e+07	3.84622e+07	4.24311e+07	4.15534e+07	4.25352e+07	4.21186e+07	4.89038e+07	4.43827e+07	4.54191e+07	4.59646e+07	2.58405e+07	2.67342e+07	2.73498e+07	GO:0004553, GO:0004563, GO:0005975	atr:18447517||http://www.genome.jp/dbget-bin/www_bget?atr:18447517	Glycosphingolipid biosynthesis - ganglio series
G8A2H2	Haloacid dehalogenase-like hydrolase	25489510	Haloacid dehalogenase-like hydrolase OS=Medicago truncatula OX=3880 GN=25489510 PE=4 SV=1	0	85.052	40	11	43	11	323	34.9	7.68	142.49	0	1	1.66845e+07	1.81478e+07	1.80616e+07	2.26493e+07	2.28789e+07	2.47146e+07	2.31874e+07	2.34115e+07	1.65128e+07	2.12648e+07	1.73937e+07	1.73758e+07	4.40917e+07	2.74776e+07	3.70024e+07	1.54063e+07	1.72575e+07	1.53645e+07	2.32103e+07	2.46735e+07	2.69173e+07	2.48978e+07	2.6982e+07	1.4737e+07	2.38577e+07	1.62528e+07	1.58647e+07	3.61337e+07	3.23438e+07	3.42086e+07	GO:0016787	atr:18441985||http://www.genome.jp/dbget-bin/www_bget?atr:18441985	---
I3T8L4	Pentose-5-phosphate 3-epimerase		Pentose-5-phosphate 3-epimerase OS=Medicago truncatula OX=3880 PE=2 SV=1	0	84.865	35	6	47	6	281	30	8.16	155.93	0	1	1.43512e+07	1.57726e+07	1.63775e+07	1.88944e+07	2.17396e+07	2.43722e+07	1.87125e+07	2.07454e+07	1.19017e+07	1.90065e+07	1.73038e+07	1.74781e+07	9.7284e+07	8.94648e+07	8.76897e+07	1.71662e+07	1.85136e+07	1.84327e+07	2.09624e+07	2.71856e+07	2.76668e+07	2.26546e+07	2.36261e+07	1.61782e+07	2.22162e+07	1.96071e+07	2.21099e+07	9.28611e+07	7.07455e+07	7.92954e+07	GO:0016857, GO:0003824, GO:0004750, GO:0006098, GO:0005975	atr:18431902||http://www.genome.jp/dbget-bin/www_bget?atr:18431902	Pentose and glucuronate interconversions
I3S4B7	Pectinesterase		Pectinesterase OS=Medicago truncatula OX=3880 PE=2 SV=1	0	84.844	18	9	61	7	554	60.5	8.81	168.22	0	1	3.00837e+07	3.30589e+07	3.34784e+07	3.97008e+07	4.34132e+07	4.55485e+07	3.93699e+07	4.08407e+07	3.37662e+07	3.73997e+07	3.24497e+07	3.16735e+07	3.90436e+07	4.08842e+07	3.84448e+07	4.04803e+07	3.7204e+07	3.89418e+07	3.6685e+07	4.00407e+07	4.24655e+07	4.31792e+07	4.02816e+07	3.95325e+07	4.39058e+07	3.79504e+07	3.74663e+07	3.24404e+07	3.37688e+07	3.2486e+07	GO:0030599, GO:0042545, GO:0004857	atr:18433421||http://www.genome.jp/dbget-bin/www_bget?atr:18433421	Pentose and glucuronate interconversions
A0A2Z2Z629	Putative tau class glutathione transferase GSTU47		Putative tau class glutathione transferase GSTU47 OS=Medicago truncatula OX=3880 PE=2 SV=1	0	84.784	38	12	55	1	219	25.5	6.93	178.25	0	1	146731	84326.6	81602.5	72032.8	81437.9	99662.5	94890.8	85791.9	58640.2	82212.1	66627.7	80210.6	190755	214802	202087	110182	85073.9	86618.6	99943.2	108531	114456	115913	118290	91362.9	100850	100566	102316	253153	262165	246266	GO:0005515, GO:0004364, GO:0006749	atr:18424727||http://www.genome.jp/dbget-bin/www_bget?atr:18424727	Glutathione metabolism
A0A072UJY1	ABC transporter family protein	25492406	ABC transporter family protein OS=Medicago truncatula OX=3880 GN=25492406 PE=4 SV=1	0	84.735	23	12	64	9	590	66	6.55	160.76	4	1	1.6865e+07	1.81035e+07	1.83472e+07	1.9658e+07	1.82573e+07	1.95911e+07	1.87722e+07	1.87327e+07	1.8969e+07	1.80953e+07	1.86509e+07	1.87277e+07	1.77647e+07	1.83581e+07	1.78321e+07	1.19606e+07	1.47735e+07	1.4726e+07	1.68494e+07	1.47259e+07	1.63922e+07	1.46318e+07	1.49953e+07	1.70644e+07	1.40642e+07	1.69145e+07	1.68641e+07	3.21019e+07	3.24618e+07	3.24776e+07	GO:0005524	atr:18426509||http://www.genome.jp/dbget-bin/www_bget?atr:18426509	---
G7LGQ5	Alpha-MPP	11431125	Alpha-MPP OS=Medicago truncatula OX=3880 GN=11431125 PE=3 SV=1	0	84.687	23	11	51	10	507	54.8	5.55	148.62	0	1	1.83192e+07	1.78508e+07	1.75969e+07	2.24894e+07	2.3323e+07	2.3683e+07	2.29364e+07	2.10337e+07	1.64443e+07	2.23651e+07	1.68342e+07	1.71969e+07	2.90181e+07	2.70145e+07	2.81128e+07	1.79421e+07	1.79768e+07	1.85747e+07	2.20832e+07	2.42948e+07	2.63867e+07	2.35484e+07	2.53346e+07	1.68602e+07	2.38993e+07	1.70189e+07	1.64596e+07	2.6063e+07	2.47002e+07	2.65418e+07	GO:0004222, GO:0006627, GO:0046872, GO:0006508	atr:18443492||http://www.genome.jp/dbget-bin/www_bget?atr:18443492	---
A0A072VF59	CDSP32 protein (Drought-induced stress protein of 32 kDa)	25482213	CDSP32 protein (Drought-induced stress protein of 32 kDa) OS=Medicago truncatula OX=3880 GN=25482213 PE=4 SV=1	0	84.369	42	11	64	11	298	33.7	6.68	133.05	0	1	7.94301e+07	5.51581e+07	6.05902e+07	4.23935e+07	5.35171e+07	4.9237e+07	4.82419e+07	5.15238e+07	3.71631e+07	4.72744e+07	3.77697e+07	3.67448e+07	4.82702e+07	5.04633e+07	4.94404e+07	7.61207e+07	5.84235e+07	6.57036e+07	4.99042e+07	6.23724e+07	6.04919e+07	5.14118e+07	5.36874e+07	4.21555e+07	4.95771e+07	4.07632e+07	4.23878e+07	4.55594e+07	4.88737e+07	4.67937e+07	GO:0016671	atr:18424182||http://www.genome.jp/dbget-bin/www_bget?atr:18424182	---
G7ITT4	Ribosomal protein	11412225	Ribosomal protein OS=Medicago truncatula OX=3880 GN=11412225 PE=2 SV=1	0	84.169	39	8	47	1	216	24.4	9.83	152.29	2	1	7.05341e+06	7.48228e+06	7.38134e+06	7.80623e+06	8.19437e+06	8.00951e+06	7.89131e+06	8.20268e+06	7.6722e+06	7.72427e+06	8.18499e+06	7.9186e+06	1.58621e+07	1.44422e+07	1.59176e+07	8.46678e+06	8.81381e+06	9.01379e+06	7.78563e+06	8.21757e+06	8.28508e+06	8.48803e+06	8.46582e+06	1.09138e+07	8.31905e+06	1.04979e+07	1.07006e+07	1.37379e+07	1.39635e+07	1.37723e+07	GO:0003735, GO:0003723, GO:0015934, GO:0006412	atr:18433281||http://www.genome.jp/dbget-bin/www_bget?atr:18433281	Ribosome
A0A072UUP2	Amine oxidase	25492054	Amine oxidase OS=Medicago truncatula OX=3880 GN=25492054 PE=3 SV=1	0	84.033	22	13	59	6	675	76.6	6.99	176.71	8	1	3.64741e+07	3.57344e+07	3.75684e+07	3.80666e+07	4.11422e+07	4.46974e+07	3.50092e+07	3.7587e+07	4.17455e+07	3.5273e+07	4.0227e+07	4.07294e+07	2.85511e+07	3.04834e+07	2.8849e+07	4.16024e+07	3.76638e+07	4.1897e+07	3.37919e+07	3.79617e+07	3.92707e+07	3.16829e+07	3.1524e+07	4.15073e+07	3.15092e+07	3.85958e+07	3.84635e+07	2.87633e+07	2.95074e+07	2.90475e+07	GO:0005507, GO:0048038, GO:0008131, GO:0009308	atr:18447660||http://www.genome.jp/dbget-bin/www_bget?atr:18447660	Tyrosine metabolism
A0A072U7V2	Glucose-6-phosphate 1-dehydrogenase	25495714	Glucose-6-phosphate 1-dehydrogenase OS=Medicago truncatula OX=3880 GN=25495714 PE=3 SV=1	0	83.914	34	17	100	12	518	59.3	7.09	239.14	5	1	2.86881e+07	2.97423e+07	3.07536e+07	3.22585e+07	3.20756e+07	3.37646e+07	3.85701e+07	3.4867e+07	3.04538e+07	4.38227e+07	2.82753e+07	2.85484e+07	2.92632e+07	3.04421e+07	2.84737e+07	2.86955e+07	3.11215e+07	3.22741e+07	3.33001e+07	3.3813e+07	3.51455e+07	3.44201e+07	3.43945e+07	2.92828e+07	3.30657e+07	2.7507e+07	2.82158e+07	3.00709e+07	3.08249e+07	2.96275e+07	GO:0006006, GO:0004345, GO:0016614, GO:0050661	atr:18441884||http://www.genome.jp/dbget-bin/www_bget?atr:18441884	Glutathione metabolism
G7JA48	RNA helicase	11427011	RNA helicase OS=Medicago truncatula OX=3880 GN=11427011 PE=4 SV=1	0	83.811	19	11	59	7	613	65.7	7.84	163.68	5	1	2.36138e+07	2.2875e+07	2.42488e+07	2.47579e+07	2.44973e+07	2.57909e+07	2.66692e+07	2.71626e+07	1.9379e+07	2.63236e+07	1.94611e+07	1.97014e+07	2.62323e+07	2.80812e+07	2.59282e+07	2.35652e+07	2.50637e+07	2.54681e+07	2.56545e+07	2.48101e+07	2.62156e+07	2.669e+07	2.64024e+07	2.169e+07	2.59193e+07	2.13419e+07	2.08815e+07	2.08901e+07	2.13493e+07	2.12736e+07	GO:0005524, GO:0003724, GO:0003676	atr:18432605||http://www.genome.jp/dbget-bin/www_bget?atr:18432605	---
G7KY60	Non-green plastid inner envelope membrane protein	11433138	Non-green plastid inner envelope membrane protein OS=Medicago truncatula OX=3880 GN=11433138 PE=2 SV=2	0	83.793	40	13	55	13	310	33.8	6.62	171.65	0	1	1.85313e+07	1.83382e+07	1.95332e+07	1.52672e+07	1.58895e+07	1.57712e+07	1.55916e+07	1.61072e+07	1.62504e+07	1.51117e+07	1.68589e+07	1.73152e+07	2.86004e+07	2.98347e+07	2.83932e+07	1.61367e+07	1.6496e+07	1.6709e+07	1.66391e+07	1.76276e+07	1.82503e+07	1.66217e+07	1.6691e+07	1.9136e+07	1.62193e+07	1.97982e+07	1.81875e+07	2.57905e+07	2.29043e+07	2.45138e+07	GO:0016020	atr:18432323||http://www.genome.jp/dbget-bin/www_bget?atr:18432323	---
A0A072TSJ2	1,4-alpha-D-glucan glucanohydrolase	25502785	1,4-alpha-D-glucan glucanohydrolase OS=Medicago truncatula OX=3880 GN=25502785 PE=4 SV=1	0	83.739	18	16	72	16	913	102.8	5.87	185.11	0	1	2.51839e+07	2.29756e+07	2.40325e+07	2.43691e+07	2.40602e+07	2.52635e+07	2.39236e+07	2.43671e+07	2.23209e+07	2.35178e+07	2.28268e+07	2.30216e+07	2.99167e+07	3.10091e+07	2.94601e+07	2.47133e+07	2.21046e+07	2.23171e+07	2.40166e+07	2.78962e+07	2.76842e+07	2.47141e+07	2.49633e+07	2.68274e+07	2.34217e+07	2.55762e+07	2.62285e+07	2.45199e+07	2.50352e+07	2.46053e+07	GO:0005975, GO:0005509, GO:0004556, GO:0003824	atr:18431946||http://www.genome.jp/dbget-bin/www_bget?atr:18431946	Starch and sucrose metabolism
B7FKX2	UDP-glucuronate decarboxylase	11420132	UDP-glucuronate decarboxylase OS=Medicago truncatula OX=3880 GN=11420132 PE=2 SV=1	0	83.732	32	10	45	5	351	39.6	7.21	135.9	4	1	2.62054e+07	2.2888e+07	2.42724e+07	1.76555e+07	2.1824e+07	2.12266e+07	2.46314e+07	2.47516e+07	2.08575e+07	2.5041e+07	1.99507e+07	2.0272e+07	2.74679e+07	1.82139e+07	2.33007e+07	2.46946e+07	2.15557e+07	2.21805e+07	2.10621e+07	2.31678e+07	2.26669e+07	2.43113e+07	2.33184e+07	2.25791e+07	2.48856e+07	2.20936e+07	2.23955e+07	2.61184e+07	2.1333e+07	2.49263e+07	GO:0042732, GO:0048040, GO:0070403	atr:18436004||http://www.genome.jp/dbget-bin/www_bget?atr:18436004	Amino sugar and nucleotide sugar metabolism
G7KYN5	CCT-beta	11421373	CCT-beta OS=Medicago truncatula OX=3880 GN=11421373 PE=3 SV=1	0	83.623	28	14	66	14	527	56.9	5.58	172.77	0	1	1.28994e+07	1.21188e+07	1.1895e+07	1.34847e+07	1.35175e+07	1.3753e+07	1.34522e+07	1.40885e+07	1.40039e+07	1.38163e+07	1.40854e+07	1.414e+07	1.54484e+07	1.61739e+07	1.53935e+07	1.47138e+07	1.3586e+07	1.3106e+07	1.51178e+07	1.51745e+07	1.52869e+07	1.5585e+07	1.57843e+07	1.59749e+07	1.59313e+07	1.57963e+07	1.57516e+07	1.42396e+07	1.43122e+07	1.45095e+07	GO:0005829, GO:0006457, GO:0005832, GO:0005524, GO:0051082, GO:0016887	atr:18437388||http://www.genome.jp/dbget-bin/www_bget?atr:18437388	---
G7IEX3	Putative EGF-like calcium-binding domain, PA domain, complement Clr-like EGF	11412722	Putative EGF-like calcium-binding domain, PA domain, complement Clr-like EGF OS=Medicago truncatula OX=3880 GN=11412722 PE=3 SV=2	0	83.595	25	14	76	9	632	69.5	5.55	207.89	5	1	2.04763e+07	1.687e+07	1.85179e+07	1.24721e+07	1.42807e+07	1.26122e+07	1.5288e+07	1.59902e+07	1.16733e+07	1.58501e+07	1.18807e+07	1.20782e+07	1.31848e+07	1.33733e+07	1.32165e+07	2.09552e+07	1.72373e+07	1.81264e+07	1.2701e+07	1.28577e+07	1.21276e+07	1.44623e+07	1.43739e+07	1.20964e+07	1.60822e+07	1.25751e+07	1.23063e+07	1.41379e+07	1.43302e+07	1.40413e+07	GO:0005509	atr:18439103||http://www.genome.jp/dbget-bin/www_bget?atr:18439103	---
G7J950	Eukaryotic translation initiation factor 3 subunit B	11429932	Eukaryotic translation initiation factor 3 subunit B OS=Medicago truncatula OX=3880 GN=11429932 PE=3 SV=2	0	83.557	20	15	39	15	716	82.1	5.12	117.34	0	1	2.63349e+07	2.95609e+07	2.76163e+07	3.27047e+07	2.99951e+07	3.12753e+07	3.23879e+07	3.16008e+07	2.82719e+07	3.12081e+07	2.98433e+07	2.96368e+07	4.29934e+07	3.10801e+07	3.99531e+07	2.67482e+07	2.82483e+07	2.79883e+07	2.96821e+07	3.01574e+07	3.13505e+07	3.17608e+07	3.17282e+07	2.64668e+07	3.0981e+07	2.73212e+07	2.74402e+07	4.06078e+07	3.40669e+07	3.76765e+07	GO:0005515, GO:0031369, GO:0003723, GO:0006413, GO:0003743, GO:0003676, GO:0005852	atr:18445785||http://www.genome.jp/dbget-bin/www_bget?atr:18445785	RNA transport
G7JD38	Xylose isomerase	11445818	Xylose isomerase OS=Medicago truncatula OX=3880 GN=11445818 PE=3 SV=2	0	83.009	24	11	57	11	480	54.2	6.44	194.33	0	1	2.14584e+07	2.21832e+07	2.21265e+07	2.22425e+07	2.35917e+07	2.46918e+07	2.35001e+07	2.45299e+07	2.3123e+07	2.32662e+07	2.38614e+07	2.45188e+07	4.97431e+07	4.99728e+07	4.83564e+07	2.60194e+07	2.82579e+07	2.8483e+07	2.29103e+07	2.41902e+07	2.56461e+07	2.42007e+07	2.34186e+07	2.47066e+07	2.33044e+07	2.51768e+07	2.59443e+07	4.74963e+07	3.99773e+07	4.38332e+07	GO:0005975, GO:0009045	atr:18435475||http://www.genome.jp/dbget-bin/www_bget?atr:18435475	Pentose and glucuronate interconversions
I3T0H2	ATP synthase F0 sector subunit C	atpH	ATP synthase F0 sector subunit C OS=Medicago truncatula OX=3880 GN=atpH PE=2 SV=1	0	82.991	62	3	101	3	81	8	4.44	268.52	0	1	4.33925e+08	7.48638e+08	7.72549e+08	8.50627e+08	6.07127e+08	7.14816e+08	6.51416e+08	5.95928e+08	9.62514e+08	6.63942e+08	8.78807e+08	8.70868e+08	4.10794e+08	4.39075e+08	4.50604e+08	4.32405e+08	6.48661e+08	6.7467e+08	8.33583e+08	5.80549e+08	7.45277e+08	5.89648e+08	5.88024e+08	8.64453e+08	5.59705e+08	7.61223e+08	7.97663e+08	3.76832e+08	4.05407e+08	3.92231e+08	GO:0015078, GO:0045263, GO:0015986, GO:0033177, GO:1902600	atr:2546500|atpH, AmtrCp009|http://www.genome.jp/dbget-bin/www_bget?atr:2546500	Photosynthesis
A0A072V0K8	Alpha-galactosidase	25489841	Alpha-galactosidase OS=Medicago truncatula OX=3880 GN=25489841 PE=3 SV=1	0	82.963	23	9	98	8	433	47.8	6.38	263.27	0	1	9.08978e+07	8.23508e+07	8.931e+07	6.81813e+07	7.07853e+07	6.9576e+07	6.94234e+07	6.9479e+07	8.06708e+07	6.42769e+07	7.66141e+07	7.70199e+07	3.54043e+07	3.40571e+07	3.59822e+07	9.86226e+07	6.92673e+07	7.83103e+07	5.59694e+07	7.24324e+07	6.8524e+07	6.90258e+07	6.56472e+07	7.64156e+07	6.11834e+07	6.84562e+07	6.84547e+07	2.03555e+07	2.01737e+07	2.03864e+07	GO:0005975, GO:0003824, GO:0004553	atr:18433558||http://www.genome.jp/dbget-bin/www_bget?atr:18433558	Glycosphingolipid biosynthesis - globo and isoglobo series
G7KEZ1	Isoflavone reductase	11410094	Isoflavone reductase OS=Medicago truncatula OX=3880 GN=11410094 PE=2 SV=1	0	82.878	38	15	70	13	318	35.4	5.58	201.18	2	1	6.43381e+07	6.53672e+07	6.81698e+07	8.42618e+07	8.78231e+07	9.65452e+07	8.75324e+07	8.88233e+07	7.7997e+07	8.05842e+07	7.564e+07	7.61425e+07	5.75606e+07	5.96316e+07	5.69884e+07	6.60242e+07	6.63252e+07	6.76535e+07	8.36355e+07	9.2024e+07	9.73305e+07	8.56388e+07	9.29258e+07	8.12997e+07	8.2509e+07	7.75479e+07	7.69413e+07	5.97719e+07	6.01087e+07	5.84999e+07	---	atr:18422627||http://www.genome.jp/dbget-bin/www_bget?atr:18422627	---
G7KX96	Alpha-mannosidase	11427062	Alpha-mannosidase OS=Medicago truncatula OX=3880 GN=11427062 PE=3 SV=1	0	82.703	14	13	92	8	1022	115.2	6	249.35	0	1	1.05371e+07	1.07088e+07	1.20611e+07	6.24682e+06	6.08716e+06	5.50331e+06	6.00047e+06	5.47668e+06	6.72766e+06	6.09013e+06	6.66333e+06	6.636e+06	5.86017e+06	6.18887e+06	6.02115e+06	9.25913e+06	9.19114e+06	9.8372e+06	5.86883e+06	6.31904e+06	5.84071e+06	5.84575e+06	5.74565e+06	7.93072e+06	6.01597e+06	7.75772e+06	7.26501e+06	5.15022e+06	5.19608e+06	5.04882e+06	GO:0006013, GO:0030246, GO:0005975, GO:0004559, GO:0003824	atr:18434345||http://www.genome.jp/dbget-bin/www_bget?atr:18434345	Other glycan degradation
G7IL50	Methionine S-methyltransferase	11434316	Methionine S-methyltransferase OS=Medicago truncatula OX=3880 GN=11434316 PE=3 SV=1	0	82.415	13	13	41	13	1092	121	5.8	130.99	0	1	1.44142e+07	1.41071e+07	1.45631e+07	1.56605e+07	1.52788e+07	1.60134e+07	1.55876e+07	1.54291e+07	1.52091e+07	1.53127e+07	1.53241e+07	1.49935e+07	1.43039e+07	1.4869e+07	1.44913e+07	1.44028e+07	1.37236e+07	1.42636e+07	1.54205e+07	1.62589e+07	1.71277e+07	1.62088e+07	1.60051e+07	1.51814e+07	1.58285e+07	1.46923e+07	1.46185e+07	1.19957e+07	1.20324e+07	1.21038e+07	GO:0008168, GO:0030170, GO:0003824, GO:0009058	atr:18427820||http://www.genome.jp/dbget-bin/www_bget?atr:18427820	Selenocompound metabolism
H0UST0	Delta-1-pyrroline-5-carboxylate synthase	P5CS2	Delta-1-pyrroline-5-carboxylate synthase OS=Medicago truncatula OX=3880 GN=P5CS2 PE=2 SV=1	0	82.205	22	15	66	8	717	78	7.42	180.36	0	1	1.43812e+07	1.32221e+07	1.41404e+07	1.39261e+07	1.63478e+07	1.63177e+07	1.66212e+07	1.68679e+07	1.09068e+07	1.67294e+07	1.11367e+07	1.12003e+07	1.84923e+07	1.66431e+07	1.69121e+07	1.66544e+07	1.34274e+07	1.42603e+07	1.48485e+07	1.80392e+07	1.7948e+07	1.86508e+07	1.91325e+07	1.31233e+07	1.86944e+07	1.27113e+07	1.29966e+07	1.31946e+07	1.3571e+07	1.29854e+07	GO:0016620, GO:0016491, GO:0003824, GO:0004350, GO:0006561, GO:0004349, GO:0005737	atr:18436293||http://www.genome.jp/dbget-bin/www_bget?atr:18436293	Arginine and proline metabolism
B7FI39	12-oxophytodienoate reductase-like protein	11444739	12-oxophytodienoate reductase-like protein OS=Medicago truncatula OX=3880 GN=11444739 PE=2 SV=1	0	82.062	33	11	43	7	371	41.2	6.37	121.8	4	1	7.91219e+06	9.6949e+06	9.02608e+06	1.02379e+07	8.74041e+06	8.56038e+06	8.08298e+06	7.75502e+06	8.31277e+06	8.00264e+06	9.00075e+06	8.71283e+06	1.00732e+07	1.02747e+07	1.0189e+07	7.62801e+06	8.39456e+06	8.32187e+06	8.52653e+06	8.41027e+06	8.64308e+06	6.96189e+06	6.8045e+06	7.19851e+06	6.50616e+06	7.30861e+06	7.2875e+06	9.68168e+06	8.75294e+06	9.64896e+06	GO:0010181, GO:0003824, GO:0016491	atr:18448470||http://www.genome.jp/dbget-bin/www_bget?atr:18448470	alpha-Linolenic acid metabolism
G7J648	5-methyltetrahydropteroyltriglutamate--homocysteine S-methyltransferase	11442193	5-methyltetrahydropteroyltriglutamate--homocysteine S-methyltransferase OS=Medicago truncatula OX=3880 GN=11442193 PE=3 SV=1	0	82.006	18	15	102	10	813	90.6	7.23	255.64	0	1	1.96548e+07	2.08701e+07	2.0509e+07	2.3949e+07	2.30898e+07	2.41329e+07	2.3165e+07	2.3395e+07	1.8285e+07	2.26124e+07	1.96998e+07	1.95474e+07	3.46549e+07	3.67971e+07	3.45092e+07	2.17858e+07	1.93212e+07	1.97126e+07	2.20459e+07	2.40834e+07	2.46558e+07	2.51116e+07	2.48536e+07	1.78401e+07	2.3648e+07	1.86173e+07	1.89744e+07	2.84831e+07	2.99477e+07	2.82338e+07	GO:0003871, GO:0008652, GO:0008270, GO:0009086	atr:18421537||http://www.genome.jp/dbget-bin/www_bget?atr:18421537	Selenocompound metabolism
B7FJZ6	Delta-aminolevulinic acid dehydratase		Delta-aminolevulinic acid dehydratase OS=Medicago truncatula OX=3880 PE=2 SV=1	0	81.991	19	6	70	6	413	45.3	6.28	167.1	0	1	6.75569e+06	5.57604e+06	5.60029e+06	6.17452e+06	7.50814e+06	7.13262e+06	7.39098e+06	7.55059e+06	6.1395e+06	7.29698e+06	6.26122e+06	6.28687e+06	9.17136e+06	9.74648e+06	9.04976e+06	7.17066e+06	5.93615e+06	6.13423e+06	5.26605e+06	6.69705e+06	6.33605e+06	7.35525e+06	6.96962e+06	5.63558e+06	7.56394e+06	5.53401e+06	5.71097e+06	9.36427e+06	9.80028e+06	9.06735e+06	GO:0003824, GO:0046872, GO:0004655, GO:0033014	atr:18434002||http://www.genome.jp/dbget-bin/www_bget?atr:18434002	Porphyrin and chlorophyll metabolism
A0A072VBW0	General regulatory factor 2	25487782	General regulatory factor 2 OS=Medicago truncatula OX=3880 GN=25487782 PE=3 SV=1	0	81.947	52	11	60	7	261	29.5	4.83	190.88	2	1	2.25251e+07	2.47254e+07	2.38265e+07	2.64792e+07	2.58398e+07	2.5361e+07	2.46348e+07	2.53267e+07	2.31049e+07	2.43958e+07	2.40177e+07	2.37957e+07	3.85563e+07	4.10978e+07	3.88692e+07	2.07145e+07	2.38334e+07	2.31001e+07	2.622e+07	2.54763e+07	2.60197e+07	2.51714e+07	2.5249e+07	2.4703e+07	2.36727e+07	2.47635e+07	2.48455e+07	3.97104e+07	3.43312e+07	3.65497e+07	---	atr:18442914||http://www.genome.jp/dbget-bin/www_bget?atr:18442914	---
G7LCZ9	Serine carboxypeptidase S28 family protein	MTR_8g076210	Serine carboxypeptidase S28 family protein OS=Medicago truncatula OX=3880 GN=MTR_8g076210 PE=3 SV=1	0	81.891	24	11	67	8	455	51	5.3	184.73	3	1	3.7767e+07	4.00234e+07	4.46271e+07	1.53608e+07	1.62663e+07	1.24838e+07	1.32547e+07	1.29152e+07	1.30036e+07	1.30045e+07	1.39333e+07	1.34403e+07	1.42833e+07	1.51932e+07	1.45685e+07	3.6004e+07	4.11968e+07	4.47921e+07	1.43398e+07	1.548e+07	1.2621e+07	1.30108e+07	1.33029e+07	1.34648e+07	1.33899e+07	1.38562e+07	1.37841e+07	1.35665e+07	1.41153e+07	1.37226e+07	GO:0008236, GO:0006508	atr:18444652||http://www.genome.jp/dbget-bin/www_bget?atr:18444652	---
A0A072VQY4	Quinolinate phosphoribosyltransferase [decarboxylating]	25482489	Quinolinate phosphoribosyltransferase [decarboxylating] OS=Medicago truncatula OX=3880 GN=25482489 PE=3 SV=1	0	81.731	31	10	28	10	374	41	7.24	73.66	0	1	2.88157e+07	2.17154e+07	2.39453e+07	1.89709e+07	2.24402e+07	2.19036e+07	2.25587e+07	2.19224e+07	1.79599e+07	2.28497e+07	1.70778e+07	1.72583e+07	2.08502e+07	2.19991e+07	2.05693e+07	3.34145e+07	1.95399e+07	2.11734e+07	1.55484e+07	1.83006e+07	1.81965e+07	2.45015e+07	2.27275e+07	2.3993e+07	2.61854e+07	1.99113e+07	2.11836e+07	1.73068e+07	1.81481e+07	1.76525e+07	GO:0003824, GO:0016763, GO:0009435, GO:0004514	atr:18445420||http://www.genome.jp/dbget-bin/www_bget?atr:18445420	Nicotinate and nicotinamide metabolism
G7KCQ5	Ubiquitinyl hydrolase 1	11432874	Ubiquitinyl hydrolase 1 OS=Medicago truncatula OX=3880 GN=11432874 PE=3 SV=1	0	81.599	15	18	88	5	1123	131.9	5.69	184.46	0	1	938327	958277	878243	1.07808e+06	998623	1.03794e+06	1.07146e+06	1.05032e+06	853787	1.04342e+06	916722	882194	1.41291e+06	1.55994e+06	1.37133e+06	1.13389e+06	1.00004e+06	1.02585e+06	1.04719e+06	1.16806e+06	1.13901e+06	1.22366e+06	1.3437e+06	1.09439e+06	1.25924e+06	1.12119e+06	1.07288e+06	1.14056e+06	1.19218e+06	1.15522e+06	GO:0005515, GO:0016579, GO:0004843, GO:0006511	atr:18421576||http://www.genome.jp/dbget-bin/www_bget?atr:18421576	---
B7FN18	ATP:AMP phosphotransferase	11407139	ATP:AMP phosphotransferase OS=Medicago truncatula OX=3880 GN=11407139 PE=2 SV=1	0	81.275	41	12	71	12	243	26.7	7.81	190.16	0	1	3.44869e+07	3.49065e+07	3.60136e+07	3.94059e+07	4.24007e+07	4.32644e+07	4.17713e+07	4.04925e+07	3.56716e+07	4.08083e+07	3.48992e+07	3.59869e+07	3.86197e+07	4.1161e+07	3.8822e+07	3.24719e+07	3.38707e+07	3.34468e+07	3.97494e+07	4.14087e+07	4.47883e+07	3.9894e+07	4.03995e+07	3.75504e+07	3.96209e+07	3.72039e+07	3.71534e+07	3.76016e+07	3.89228e+07	3.72715e+07	GO:0016776, GO:0005524, GO:0019205, GO:0006139, GO:0004017	atr:18435052||http://www.genome.jp/dbget-bin/www_bget?atr:18435052	Thiamine metabolism
G7L7K0	Lipoxygenase	11428623	Lipoxygenase OS=Medicago truncatula OX=3880 GN=11428623 PE=3 SV=1	0	81.149	8	9	127	3	868	97.3	6.81	329.78	0	1	2.81213e+07	2.23171e+07	2.43373e+07	1.74514e+07	1.85585e+07	1.8718e+07	1.66161e+07	1.83207e+07	1.6785e+07	1.64112e+07	1.7577e+07	1.69878e+07	2.7285e+07	2.85352e+07	2.81565e+07	3.19028e+07	2.26649e+07	2.63916e+07	1.57594e+07	1.86037e+07	1.76606e+07	1.43779e+07	1.55187e+07	1.40201e+07	1.47658e+07	1.45431e+07	1.44457e+07	2.35332e+07	2.49021e+07	2.41504e+07	GO:0005515, GO:0016491, GO:0046872, GO:0016702	atr:18439893||http://www.genome.jp/dbget-bin/www_bget?atr:18439893	---
G7JXE0	Acyl-coenzyme A oxidase	11435602	Acyl-coenzyme A oxidase OS=Medicago truncatula OX=3880 GN=11435602 PE=3 SV=1	0	80.858	23	14	63	13	664	74.4	7.36	166.98	1	1	1.54621e+07	1.66179e+07	1.60876e+07	1.90327e+07	1.82409e+07	1.87576e+07	1.9609e+07	1.96911e+07	1.77418e+07	1.91058e+07	1.80539e+07	1.75747e+07	2.13072e+07	2.22036e+07	2.15705e+07	1.74156e+07	1.7705e+07	1.8087e+07	1.90969e+07	1.83794e+07	1.9014e+07	1.88684e+07	1.91993e+07	1.70661e+07	1.90569e+07	1.75601e+07	1.71214e+07	2.03677e+07	2.12044e+07	2.07761e+07	GO:0050660, GO:0006635, GO:0003997, GO:0006631, GO:0005777, GO:0016627, GO:0071949	atr:18428210||http://www.genome.jp/dbget-bin/www_bget?atr:18428210	Biosynthesis of unsaturated fatty acids
I3T3T7	40S ribosomal protein S8	25500268	40S ribosomal protein S8 OS=Medicago truncatula OX=3880 GN=25500268 PE=2 SV=1	0	80.813	36	8	52	4	215	24.6	10.32	175.92	2	1	6.53932e+06	8.66932e+06	8.18198e+06	1.15052e+07	8.22762e+06	9.40185e+06	8.55344e+06	8.40183e+06	1.03238e+07	8.45239e+06	1.05263e+07	1.04702e+07	1.18105e+07	1.21368e+07	1.14292e+07	7.99706e+06	8.56081e+06	8.73648e+06	9.396e+06	8.78975e+06	9.58076e+06	8.78046e+06	8.99001e+06	9.14338e+06	8.62904e+06	8.87312e+06	9.21906e+06	1.19857e+07	1.27853e+07	1.2047e+07	GO:0006412, GO:0003735, GO:0005840	atr:18426597||http://www.genome.jp/dbget-bin/www_bget?atr:18426597	Ribosome
A0A396GQP6	Putative FAS1 domain-containing protein	MtrunA17_Chr8g0379611	Putative FAS1 domain-containing protein OS=Medicago truncatula OX=3880 GN=MtrunA17_Chr8g0379611 PE=3 SV=1	0	80.813	25	7	59	6	316	33.6	8.84	181.59	1	1	5.71221e+07	4.94352e+07	5.57388e+07	2.22395e+07	2.24395e+07	1.86337e+07	2.26732e+07	2.20846e+07	2.39774e+07	2.31197e+07	2.45028e+07	2.40745e+07	2.87487e+07	2.46548e+07	2.78228e+07	5.31874e+07	5.24546e+07	5.83154e+07	2.4203e+07	2.43518e+07	2.06027e+07	2.37323e+07	2.23241e+07	2.60116e+07	2.23827e+07	2.67593e+07	2.6631e+07	2.88609e+07	2.48576e+07	2.72204e+07	---	atr:18433492||http://www.genome.jp/dbget-bin/www_bget?atr:18433492	---
A0A072VIQ6	Ubiquitinyl hydrolase 1	11418867	Ubiquitinyl hydrolase 1 OS=Medicago truncatula OX=3880 GN=11418867 PE=3 SV=1	0	80.76	14	17	64	13	1118	130.9	5.88	139.14	0	1	8.70579e+06	8.91907e+06	8.98481e+06	8.95213e+06	9.11432e+06	9.21678e+06	9.4473e+06	9.60757e+06	8.92353e+06	9.36884e+06	8.42586e+06	8.88902e+06	6.90849e+06	7.17884e+06	7.07296e+06	8.6787e+06	9.01794e+06	9.04861e+06	9.63184e+06	9.06583e+06	9.54875e+06	8.93251e+06	9.30639e+06	9.65833e+06	9.40227e+06	9.83011e+06	9.75608e+06	8.82178e+06	8.94295e+06	8.88679e+06	GO:0004843, GO:0006511, GO:0005515, GO:0016579	atr:18421576||http://www.genome.jp/dbget-bin/www_bget?atr:18421576	---
G7JWM6	Citrulline--aspartate ligase	11414012	Citrulline--aspartate ligase OS=Medicago truncatula OX=3880 GN=11414012 PE=3 SV=1	0	80.733	31	16	79	4	480	53.1	6.89	210.83	0	1	2.59376e+06	2.36304e+06	2.4184e+06	2.56323e+06	2.89616e+06	2.90463e+06	2.62225e+06	2.65836e+06	2.21325e+06	2.5531e+06	2.13611e+06	2.09695e+06	1.77461e+06	1.82995e+06	1.77097e+06	2.32744e+06	2.05402e+06	2.09307e+06	2.45666e+06	2.60438e+06	2.68583e+06	2.88341e+06	2.85261e+06	1.77827e+06	2.86622e+06	1.9244e+06	1.97711e+06	2.31793e+06	2.23875e+06	2.18919e+06	GO:0005524, GO:0006526, GO:0004055	atr:18427602||http://www.genome.jp/dbget-bin/www_bget?atr:18427602	Arginine biosynthesis
A0A072TU53	DUF642 family protein	25479953	DUF642 family protein OS=Medicago truncatula OX=3880 GN=25479953 PE=4 SV=1	0	80.682	38	11	56	6	367	40.1	8.54	167.68	6	1	7.10496e+07	6.49647e+07	7.14095e+07	5.03717e+07	5.43374e+07	5.23285e+07	7.44894e+07	8.0565e+07	4.23204e+07	7.54913e+07	4.15362e+07	4.21205e+07	3.1879e+07	3.24887e+07	3.26366e+07	5.5922e+07	6.06657e+07	6.46478e+07	5.13516e+07	5.34073e+07	5.51432e+07	5.07509e+07	5.05358e+07	4.42326e+07	4.62147e+07	4.30615e+07	4.2497e+07	3.25209e+07	3.30945e+07	3.36315e+07	---	atr:18435220||http://www.genome.jp/dbget-bin/www_bget?atr:18435220	---
G7L9H1	Phosphoserine aminotransferase	11443166	Phosphoserine aminotransferase OS=Medicago truncatula OX=3880 GN=11443166 PE=3 SV=1	0	80.651	28	12	54	12	428	47.2	8.06	130.77	0	1	3.95324e+07	3.39633e+07	3.73681e+07	2.80293e+07	3.45744e+07	3.21687e+07	3.24385e+07	3.40868e+07	2.22303e+07	3.25707e+07	2.34527e+07	2.28416e+07	3.35215e+07	3.51901e+07	3.40782e+07	3.86077e+07	3.23163e+07	3.39823e+07	2.85416e+07	3.53748e+07	3.44459e+07	3.37799e+07	3.49952e+07	2.44e+07	3.34068e+07	2.4407e+07	2.45013e+07	3.0305e+07	3.08352e+07	3.04398e+07	GO:0006564, GO:0003824, GO:0004648	atr:18428557||http://www.genome.jp/dbget-bin/www_bget?atr:18428557	Vitamin B6 metabolism
A0A396J7H2	Putative nepenthesin	MtrunA17_Chr2g0287861	Putative nepenthesin OS=Medicago truncatula OX=3880 GN=MtrunA17_Chr2g0287861 PE=4 SV=1	0	80.648	24	9	26	5	431	46.5	8.19	99.88	4	1	2.95949e+07	2.33745e+07	2.68944e+07	1.3175e+07	1.56281e+07	1.31408e+07	1.39865e+07	1.38823e+07	1.75058e+07	1.40289e+07	1.65078e+07	1.67847e+07	1.10699e+07	1.12764e+07	1.12492e+07	3.29348e+07	3.08786e+07	3.50634e+07	1.39467e+07	1.53385e+07	1.23494e+07	1.27185e+07	1.28207e+07	1.53872e+07	1.25888e+07	1.55379e+07	1.48931e+07	1.20893e+07	1.22986e+07	1.22839e+07	GO:0004190, GO:0006508	atr:18440562||http://www.genome.jp/dbget-bin/www_bget?atr:18440562	---
B7FN11	GTP-binding nuclear protein	25490032	GTP-binding nuclear protein OS=Medicago truncatula OX=3880 GN=25490032 PE=2 SV=1	0	80.622	40	7	46	7	221	25.2	6.79	164.86	0	1	4.59792e+07	3.98824e+07	4.58976e+07	2.85021e+07	3.49336e+07	3.17964e+07	3.61393e+07	3.85739e+07	3.01562e+07	3.69086e+07	2.9946e+07	3.05947e+07	4.76625e+07	4.39619e+07	4.75398e+07	4.91962e+07	4.67598e+07	5.17354e+07	2.99246e+07	3.22635e+07	3.13398e+07	2.99216e+07	2.98473e+07	2.91129e+07	2.81826e+07	2.99753e+07	2.98838e+07	5.11119e+07	4.55381e+07	4.84924e+07	GO:0005525, GO:0003924, GO:0006913	atr:18422826||http://www.genome.jp/dbget-bin/www_bget?atr:18422826	Ribosome biogenesis in eukaryotes
[truncated: 4,510 more rows]
