# Supplementary material for: In-depth Proteomic Analysis of Alfalfa Silage Inoculated with Lactiplantibacillus plantarum Reveals Protein Transformation Mechanisms and Optimizes Dietary N Utilization
Source: Research Square preprint supplement (doi:10.21203/rs.3.rs-4190256/v1), 2024-04-11
Supplement: Supplementary file 2 [file 961e3cb1e323cd3f0c4dd3d8.xlsx]

## Sheet: Sheet1
Alignment ID	Metabolite name		PeptideRanker	Confirmed bioactivity	Rt(min)	Expreiment Mz	Adduct type	Reference m/z	m/z matched	MS/MS spectrum	CK-10	CK-11	CK-12	CK-7	CK-8	CK-9	FR-10	FR-11	FR-12	FR-7	FR-8	FR-9	LB-10	LB-11	LB-12	LB-7	LB-8	LB-9	LN-10	LN-11	LN-12	LN-7	LN-8	LN-9	P.value	Mean.CK	SD.CK	SE.CK	CV.CK	Mean.FR	SD.FR	SE.FR	CV.FR	Mean.LB	SD.LB	SE.LB	CV.LB	Mean.LN	SD.LN
POS7992	Val-Gly-Val	VGV	0.0758424		7.199	274.173	[M+H]+	274.176	True	55.05463:64006 68.52828:47934 69.07004:15700 70.06489:82831 72.08092:1563137 73.0838:44423 84.04411:44065 84.08066:42987 86.09628:411991 98.05955:41364 104.07012:19977 110.05923:52666 115.08502:80101 116.07014:56645 118.08491:244469 120.08018:40854 129.10101:878743 130.04947:39983 130.06354:26483 130.08464:72443 130.10434:56246 131.08807:15053 132.10045:77352 143.07898:77849 143.11697:38234 144.0…	4.7322e+07	6.56362e+07	6.26412e+07	4.48949e+07	5.03324e+07	5.56784e+07	1.51158e+08	1.33543e+08	1.21054e+08	1.06461e+08	1.03449e+08	1.6493e+08	2.87785e+08	3.3025e+08	2.59882e+08	2.72899e+08	2.44703e+08	2.91088e+08	3.18725e+08	3.12983e+08	2.96146e+08	3.35058e+08	2.98186e+08	2.87054e+08	7.50097e-15	5.44175e+07	8.39991e+06	3.42925e+06	15.436	1.30099e+08	2.45736e+07	1.00321e+07	18.8884	2.81101e+08	2.96726e+07	1.21138e+07	10.5558	3.08025e+08	1.75929e+07
POS13776	Ile-Ile-Arg	IIR	0.286486		7.027	401.282	[M+H]+	401.287	True	60.05593:292163 68.79704:27408 68.80029:24951 69.07008:67272 70.06501:655935 71.06853:60686 72.08041:320571 73.02818:18263 81.03289:20589 84.0807:79613 86.09638:2412092 87.09911:67841 96.04395:24581 108.044:18070 110.07011:168085 112.08541:140642 113.06979:27181 114.10194:52722 115.08508:125223 116.06913:416490 120.08025:63306 127.08549:122178 129.1011:97797 130.09555:121916 133.09521:54546 136.0…	7.34939e+06	1.12563e+07	7.62232e+06	746975	3.91337e+06	1.75478e+07	2.5431e+07	3.4728e+07	1.46029e+07	2.4217e+07	2.93923e+07	2.78764e+07	3.04652e+08	3.4413e+08	2.96953e+08	2.85974e+08	2.4572e+08	3.07488e+08	3.1625e+08	2.92716e+08	1.67056e+08	2.41823e+08	2.65358e+08	2.85509e+08	1.07034e-13	8.07269e+06	5.85841e+06	2.39169e+06	72.5708	2.60413e+07	6.70212e+06	2.73613e+06	25.7365	2.97486e+08	3.20611e+07	1.30889e+07	10.7773	2.61452e+08	5.2669e+07
POS2537	Gly-Ile-Lys	GIK	0.260246		2.951	159.111	[M+2H]+	159.113	True	55.05424:26610 55.93449:87478 56.04966:18430 57.03349:12201 60.04445:170574 60.64727:11484 69.03303:17592 69.07011:136881 70.02883:50788 70.06497:64175 70.31763:19529 71.04918:15287 72.08047:460259 72.93707:21123 74.05994:16220 75.05532:189124 84.08074:1585424 85.02821:47461 85.08401:80141 86.05997:15842 86.0964:1354154 87.04357:55320 87.05521:300382 87.09906:55556 88.03944:16776 92.86066:11894 9…	2.74085e+07	3.07847e+07	3.59693e+07	2.95208e+07	2.94934e+07	1.32589e+06	1.00592e+07	1.86021e+07	1.01617e+07	5.15989e+06	1.08559e+07	1.42545e+07	2.78909e+08	4.18687e+08	2.77503e+08	2.35094e+08	2.66317e+08	3.2982e+08	2.65757e+08	2.77154e+08	3.09192e+08	2.91437e+08	2.73319e+08	2.94729e+08	2.94211e-13	2.57504e+07	1.23069e+07	5.02428e+06	47.7931	1.15156e+07	4.52777e+06	1.84846e+06	39.3188	3.01055e+08	6.52187e+07	2.66254e+07	21.6634	2.85265e+08	1.60575e+07
POS3787	Ile-Leu-Lys	ILK	0.181064		7.009	187.142	[M+2H]+	187.144	True	55.05463:23553 56.04967:69057 57.05761:25256 58.06529:76929 68.04928:35387 69.07005:1129970 70.06498:722580 71.06851:21573 72.08092:225796 74.05995:92250 82.06512:37819 84.04432:129259 84.08066:1891172 85.08401:81854 86.05997:584328 86.09632:7937317 87.09901:356832 88.03867:31498 100.07477:170565 101.1062:76503 110.07048:117813 116.07023:133587 120.0802:28157 124.11133:28048 127.08543:84168 128.0…	3.91426e+07	3.68191e+07	4.63024e+07	3.78945e+07	4.21575e+07	5.79009e+07	8.08055e+07	1.44253e+08	6.19497e+07	1.11386e+08	1.19768e+08	1.24667e+08	2.99048e+08	3.38837e+08	3.5397e+08	3.30559e+08	3.24839e+08	2.91424e+08	3.38891e+08	2.89842e+08	1.99575e+08	2.44908e+08	3.41743e+08	2.47594e+08	8.66195e-12	4.33695e+07	7.89915e+06	3.22481e+06	18.2136	1.07138e+08	3.03239e+07	1.23797e+07	28.3036	3.23113e+08	2.38376e+07	9.73166e+06	7.37749	2.77092e+08	5.67032e+07
NEG8143	Leu-Pro-Ile	LPI	0.524012		7.752	340.218	[M-H]-	340.224	True	56.96007:1846 59.01131:2824 69.12712:2531 69.13039:4022 72.99026:3524 97.30405:1951 98.0208:2075 98.05855:2439 109.01352:10240 112.03722:2764 114.05286:36040 124.03733:2072 129.10056:32148 130.08429:184093 155.11603:21680 164.06818:17521 166.08418:13074 166.12059:9450 167.04228:2256 179.11629:3042 181.09465:6845 181.13159:19871 183.14597:232819 209.12689:34334 210.07391:36212 211.1407:4163 222.03…	2.83228e+06	3.26827e+06	3.71538e+06	793602	3.62844e+06	1.96627e+06	2808.77	848597	2808.77	2808.77	1.4647e+06	2808.77	4.43272e+07	4.75207e+07	4.08791e+07	4.42375e+07	4.28973e+07	5.2787e+07	3.79256e+07	4.31915e+07	3.80739e+07	5.68097e+07	3.09689e+07	3.74291e+07	1.02481e-13	2.70071e+06	1.13191e+06	462102	41.9118	387423	626886	255925	161.809	4.54414e+07	4.20139e+06	1.71521e+06	9.24571	4.07331e+07	8.78305e+06
POS4154	Val-Ile-Arg	VIR	0.11679		6.978	194.137	[M+2H]+	194.139	True	55.05465:343216 56.04966:31255 57.0576:69254 58.06528:72258 60.0559:444614 67.5642:96008 67.56841:114225 69.07:1047058 70.06496:1079254 71.0685:70953 72.08098:3871734 73.08378:142939 74.05994:30545 84.08065:484741 86.09634:7697595 87.09895:377570 89.05892:1262536 107.06959:79571 110.07018:95323 112.08663:171206 113.06973:29267 114.10188:73189 115.08504:203142 116.06897:385694 125.07021:2159332 12…	5.21871e+07	4.90706e+07	4.94527e+07	2.56767e+07	6.0315e+07	8.42449e+07	2.60768e+07	7.89313e+07	5.03144e+07	5.11861e+07	2.80822e+07	6.54144e+07	4.23226e+08	5.04798e+08	4.9716e+08	4.81792e+08	3.0306e+08	5.5084e+08	3.99345e+08	3.14487e+08	2.14384e+08	5.8296e+08	3.99437e+08	3.90616e+08	2.37941e-09	5.34912e+07	1.89924e+07	7.7536e+06	35.5056	5.00009e+07	2.06342e+07	8.42386e+06	41.2676	4.60146e+08	8.72892e+07	3.56357e+07	18.9699	3.83538e+08	1.21411e+08
POS9354	Ile-Gly-Ile	IGI	0.370036		7.827	302.204	[M+H]+	302.207	True	52.3849:2707 55.0546:4083 69.07001:6005 69.3255:9729 70.06495:29307 71.04915:3022 72.08035:3951 79.05384:4006 81.06948:13132 84.08062:3497 85.02817:2900 86.09628:575290 87.09969:24799 93.06975:5669 95.04914:5377 95.08518:13279 97.02796:9349 97.06423:9650 98.0595:9743 99.07952:3834 102.05381:2904 105.06902:4677 107.08425:6074 109.06291:4769 109.10072:5632 112.0751:3062 116.07008:10973 119.08423:35…	1.62799e+08	1.6327e+08	7.58928e+07	1.4484e+08	1.49368e+08	9.82924e+07	1.04481e+08	1.35196e+08	1.85785e+08	9.92735e+07	1.94998e+08	1.22106e+08	3.15382e+08	6.21054e+08	3.72021e+08	1.67973e+08	3.78479e+08	4.67655e+08	2.24387e+08	4.2739e+08	4.71e+08	2.89472e+08	4.78525e+08	5.04583e+08	4.81998e-05	1.3241e+08	3.65407e+07	1.49177e+07	27.5965	1.40307e+08	4.09489e+07	1.67173e+07	29.1853	3.87094e+08	1.5145e+08	6.18292e+07	39.1249	3.99226e+08	1.14846e+08
POS3472	Val-Ile-Lys	VIK	0.0560913		6.965	180.134	[M+2H]+	180.136	True	53.03895:2760 55.05455:25402 55.9348:3522 56.05003:8536 57.07026:3390 67.05458:4042 69.03355:9598 69.06996:129786 70.06491:34765 71.04916:3326 72.08089:257009 73.08437:9814 75.87332:2638 79.05451:3201 82.06438:4484 84.04408:8379 84.08063:225905 85.08397:8077 86.09632:736044 87.09896:37525 91.05424:3977 93.0689:14532 94.06461:4193 95.04826:3330 101.10615:11965 105.03242:32063 105.06902:4852 106.06…	3.31878e+07	2.48278e+07	2.90822e+07	1.7355e+07	4.10468e+07	4.05241e+07	7.60668e+07	1.55895e+08	1.04114e+08	1.08957e+08	4.47865e+07	1.21532e+08	1.62826e+08	2.26465e+08	2.44848e+08	2.32372e+08	1.34649e+08	2.3618e+08	2.1036e+08	1.22475e+08	3.73559e+07	3.34872e+08	1.81719e+08	2.21868e+08	0.000145298	3.1004e+07	9.21297e+06	3.76118e+06	29.7155	1.01892e+08	3.81704e+07	1.5583e+07	37.4617	2.06223e+08	4.58016e+07	1.86984e+07	22.2097	1.84775e+08	1.00182e+08
NEG4110	Leu-Gly-Gly	LGG	0.703645		6.59	244.126	[M-H]-	244.13	True	69.68816:1485 71.01107:2821 72.00668:1300 74.02208:76013 82.02731:1575 87.05336:51676 99.92315:53145 102.97729:1307 110.09454:1716 111.02955:1708 115.91775:5064 128.0318:1580 129.10056:2833 130.08418:7801 131.04353:1920 139.08429:2840 141.10062:20223 142.04779:2938 143.11517:15265 152.10445:2957 155.94769:6603 169.09441:56236 172.09505:2890 173.95808:24804 182.11362:2524 200.13725:122149 226.1034…	4.19257e+06	7.95255e+06	7.40513e+06	7.60277e+06	8.71512e+06	1.20313e+07	2808.77	2808.77	2808.77	2808.77	2808.77	2808.77	2.39739e+07	4.8425e+07	1.94504e+07	5.1604e+06	2.57575e+07	3.43388e+07	3.96082e+07	3.92444e+07	3.06748e+07	1.47732e+07	2.00762e+07	3.01723e+07	2.40778e-05	7.98323e+06	2.52076e+06	1.0291e+06	31.5757	2808.77	0	0	0	2.61843e+07	1.45159e+07	5.92611e+06	55.4375	2.90915e+07	1.00364e+07
POS6920	Ser-Phe	SF	0.948796	ACE inhibitor	7.248	253.115	[M+H]+	253.118	True	59.04947:21978 60.04478:1788808 61.04788:31062 62.06007:9115 67.05457:8672 68.12202:44233 69.07001:20693 70.06494:28076 72.08085:41041 77.03864:7285 79.0545:6491 81.06948:22075 84.04407:9075 84.08062:27163 86.09612:57691 87.04353:22775 87.05512:72933 88.03862:7167 89.05952:39436 91.05341:11668 95.08518:10779 98.0595:7859 103.03867:35387 103.07439:10450 107.04852:20882 107.0853:8256 109.06399:1248…	9.49008e+07	1.32341e+08	7.77945e+07	1.14715e+08	1.06281e+08	1.46868e+08	2.61498e+08	3.68798e+08	2.89025e+08	2.26129e+08	2.78087e+08	2.76234e+08	7.98552e+08	9.28756e+08	6.84769e+08	7.16546e+08	8.90678e+08	7.42601e+08	7.05423e+08	7.47867e+08	6.96915e+08	8.76927e+08	7.8256e+08	7.87287e+08	2.36368e-14	1.1215e+08	2.50276e+07	1.02175e+07	22.3161	2.83295e+08	4.72518e+07	1.92905e+07	16.6794	7.9365e+08	9.80798e+07	4.00409e+07	12.3581	7.66163e+08	6.60349e+07
POS5970	Leu-Thr	LT	0.114774	dipeptidyl peptidase IV inhibitor	3.134	233.147	[M+H]+	233.15	True	56.04957:127693 57.05762:42946 69.07009:1715061 69.30367:71457 70.07334:75814 72.08042:253058 74.05997:314104 86.0964:45113484 87.09292:129056 87.09907:1922138 88.03851:146662 102.05399:281344 118.08514:246682 120.06409:1860415 121.06718:76609 127.08545:95012 130.04796:306632 132.10033:113112 142.12036:38161 152.06851:135896 173.09048:39896 187.10498:180260 187.1424:39321 198.07385:99627 215.1355…	2.56806e+08	3.55694e+08	4.22006e+08	6.30544e+08	4.39403e+08	2.44893e+08	672653	344994	765757	557897	343944	280901	6.34665e+09	6.26073e+09	5.24532e+09	6.60061e+09	5.92876e+09	6.5625e+09	7.0538e+09	6.39993e+09	6.0499e+09	5.56621e+09	6.24846e+09	6.74766e+09	3.09548e-19	3.91558e+08	1.42327e+08	5.81049e+07	36.349	494358	199991	81645.9	40.4546	6.15743e+09	5.08173e+08	2.07461e+08	8.253	6.34433e+09	5.2354e+08
POS4664	Ser-Val	SV	0.0523218	dipeptidyl peptidase IV inhibitor	2.937	205.116	[M+H]+	205.118	True	55.05463:60145 56.04966:44915 58.0657:10778 60.0444:5641144 61.04789:73657 68.41222:21902 68.41598:33415 70.02884:23559 70.06498:67039 72.08092:2446944 73.02817:118597 73.08366:79079 74.06002:85848 81.03354:13841 84.04411:14065 84.08067:38890 85.02821:13402 86.09633:16993 87.055:282787 88.03867:18449 96.84788:14483 97.02802:11276 99.0431:11642 100.07569:13569 102.05485:18165 109.02733:11868 110.0…	8.69768e+07	8.63776e+07	9.12573e+07	1.04862e+08	8.5776e+07	8.74928e+07	1.24841e+08	1.34411e+08	1.28547e+08	1.26433e+08	1.00348e+08	1.42926e+08	5.78587e+08	7.74979e+08	7.99216e+08	5.52146e+08	6.09101e+08	5.41918e+08	4.97584e+08	6.38535e+08	8.49741e+08	6.35341e+08	6.90242e+08	5.44632e+08	2.53724e-11	9.04571e+07	7.31579e+06	2.98666e+06	8.08758	1.26251e+08	1.43034e+07	5.83934e+06	11.3293	6.42658e+08	1.14535e+08	4.67588e+07	17.8221	6.42679e+08	1.23186e+08
POS6541	Leu-Ile	LI	0.340387	Glucose uptake stimulating peptide /dipeptidyl peptidase IV inhibitor	8.087	245.183	[M+H]+	245.186	True	55.05459:59932 56.04964:10299 57.05758:3841 67.05458:3296 69.06994:35472 69.78214:4376 70.06495:116043 71.04916:4025 72.08089:1210554 73.08377:39803 81.06949:13289 84.04408:11388 84.08067:22053 86.05994:3510 86.09626:1612102 87.09967:57713 88.03863:4222 91.05342:4303 93.0689:4415 95.08519:5477 98.0595:34951 105.06902:5967 109.10074:3112 111.04363:3719 114.0533:3554 116.07009:4695 120.08018:118640…	4.00803e+07	5.11334e+07	5.90423e+07	4.86682e+07	5.17721e+07	5.75429e+07	1.64526e+07	3.27819e+07	3.66823e+07	1.64077e+07	2.77449e+07	3.25395e+07	4.33653e+08	3.61536e+08	3.97413e+08	3.9242e+08	3.61653e+08	4.48157e+08	4.64182e+08	3.53708e+08	3.51705e+08	3.24044e+08	3.61001e+08	3.78422e+08	3.90629e-16	5.13732e+07	6.81091e+06	2.78054e+06	13.2577	2.71015e+07	8.73845e+06	3.56746e+06	32.2434	3.99139e+08	3.59481e+07	1.46757e+07	9.00641	3.72177e+08	4.83855e+07
POS5022	Val-Leu	VL	0.126025	Glucose uptake stimulating peptide /dipeptidyl peptidase IV inhibitor	8.704	213.157	[M+H-H2O]+	213.16	True	55.05447:156645 57.05761:22309 57.07028:56341 69.07005:17219 70.06506:125572 70.4072:25188 71.08498:21525 72.04442:78602 72.08096:3302852 73.08381:85289 81.06953:24803 84.08068:189571 86.09632:2098985 87.09907:71898 97.06429:18066 100.0747:260919 112.07516:25083 114.09032:501836 115.09317:18629 125.07019:16143 140.14218:1580014 141.1451:91556 154.0625:17121 157.09547:24357 168.07921:106140 168.13…	5.5628e+07	6.42823e+07	5.94239e+07	5.95451e+07	6.93712e+07	7.65709e+07	6.43838e+06	8.0151e+06	7.39329e+06	1.07337e+07	7.62791e+06	9.4618e+06	2.71661e+08	3.3053e+08	3.37108e+08	2.75041e+08	2.89027e+08	3.49882e+08	3.51186e+08	3.08533e+08	3.00794e+08	2.94494e+08	3.01375e+08	3.24901e+08	1.21552e-17	6.41369e+07	7.71651e+06	3.15025e+06	12.0313	8.27836e+06	1.55502e+06	634833	18.7841	3.08875e+08	3.42671e+07	1.39895e+07	11.0942	3.13547e+08	2.11873e+07
POS9014	Tyr-Ile	YI	0.30227	dipeptidyl peptidase IV inhibitor	7.245	295.161	[M+H]+	295.165	True	68.04712:222480 69.07002:50089 74.02367:66762 84.04398:242036 84.08052:663283 85.08398:52127 86.09623:2659726 87.09981:126948 91.0542:559592 102.05481:50442 119.04845:1012934 120.05145:127912 120.08006:831213 121.06324:562058 121.08353:107491 128.06937:116420 129.10107:499116 130.08464:751993 132.08018:300484 132.10027:732678 136.07422:23430208 137.07794:1581555 147.04274:141293 147.1104:177842 1…	3.67668e+08	5.82946e+08	4.40715e+08	5.047e+08	5.08762e+08	6.12247e+08	1.56159e+08	2.21204e+08	1.54988e+08	1.5406e+08	1.59279e+08	1.63228e+08	2.29544e+09	3.00946e+09	1.89458e+09	5.67445e+08	2.29654e+09	2.48932e+09	2.19548e+09	2.57909e+09	2.5055e+09	2.88093e+09	2.45278e+09	2.67498e+09	5.7472e-09	5.0284e+08	9.00626e+07	3.67679e+07	17.9108	1.68153e+08	2.62037e+07	1.06976e+07	15.5833	2.09213e+09	8.3019e+08	3.38923e+08	39.6815	2.54812e+09	2.29381e+08
POS8693	Ile-Arg	IR	0.332363	antioxidative /ACE inhibitor /renin inhibitor /CaMPDE inhibitor /dipeptidyl peptidase IV inhibitor	2.925	288.2	[M+H]+	288.203	True	60.05584:1429606 68.91296:201301 70.0649:1943869 71.0685:77601 72.08096:209528 86.09626:5098689 87.09982:194576 112.0864:454685 113.06973:78394 114.10188:145315 115.08604:580579 116.07012:1139324 117.07282:56220 130.09573:314416 133.09659:137899 138.06497:78068 140.07924:52527 143.07964:45672 156.11211:1773800 157.10498:252865 158.08986:1722335 175.11659:9705541 176.12218:388300 183.14772:71443 1…	2.92084e+08	3.15391e+08	2.89945e+08	3.85599e+08	2.97057e+08	4.64747e+08	1.93661e+08	2.54397e+08	2.20399e+08	1.35442e+08	2.36868e+08	2.38433e+08	2.41036e+09	1.20958e+09	2.47067e+09	1.81686e+09	2.27612e+09	2.59936e+09	2.00889e+09	1.40925e+09	2.06477e+09	2.175e+09	2.40655e+09	2.27809e+09	1.60587e-10	3.40804e+08	7.05526e+07	2.8803e+07	20.7018	2.132e+08	4.32991e+07	1.76768e+07	20.3091	2.13049e+09	5.2565e+08	2.14596e+08	24.6727	2.05709e+09	3.48411e+08
POS7536	Val-Phe	VF	0.815398	ACE inhibitor /dipeptidyl peptidase IV inhibitor	7.513	265.151	[M+H]+	265.155	True	55.0546:501074 56.04959:60804 56.05797:19216 57.05745:53736 67.05403:8359 68.94874:14059 70.06492:19962 72.08088:9602463 73.07828:25876 73.0837:303131 81.06945:8289 84.08059:9190 86.0599:7838 86.09625:16059 87.04427:5034 89.0596:8128 91.0542:14874 103.05352:7556 104.05191:8093 105.06898:8224 106.04814:82104 107.04849:5022 107.08421:6937 115.08604:13840 116.07005:21125 117.07273:21651 118.07507:76…	1.50217e+09	2.18605e+09	1.92854e+09	2.12863e+09	1.74282e+09	2.39329e+09	8.68617e+08	1.05548e+09	9.33243e+08	6.98279e+08	8.46601e+08	9.17608e+08	6.60881e+09	9.38191e+09	7.73135e+09	7.29809e+09	7.29991e+09	7.68118e+09	7.63837e+09	8.03685e+09	6.89354e+09	7.13739e+09	7.28654e+09	7.57417e+09	2.98288e-16	1.98025e+09	3.23288e+08	1.31982e+08	16.3256	8.86638e+08	1.17513e+08	4.79744e+07	13.2537	7.66687e+09	9.31221e+08	3.80169e+08	12.146	7.42781e+09	4.06551e+08
POS10129	Leu-Trp	LW	0.985244	antioxidative /renin inhibitor /ACE inhibitor /dipeptidyl peptidase III inhibitor /dipeptidyl peptidase IV inhibitor	8.107	318.177	[M+H]+	318.181	True	52.96214:32986 53.65575:32288 58.8345:29736 59.51357:28745 69.50436:51430 69.50766:44587 74.0237:45411 86.09631:4085329 87.09964:209859 93.40795:28562 113.10625:30682 120.08021:44308 127.90326:27407 130.06349:264883 130.08467:52228 132.07884:311499 141.10074:227513 144.07993:459529 145.08237:40822 146.05817:267710 153.05368:38288 159.09009:1419878 160.09392:124013 170.05734:297696 188.0683:311320…	2.3484e+08	2.78407e+08	3.05715e+08	3.36991e+08	3.0865e+08	3.78384e+08	9.18077e+07	1.14493e+08	1.13152e+08	7.35609e+07	111526169	1.00152e+08	1.26843e+09	1.24979e+09	1.28889e+09	9.95747e+08	1.37542e+09	1.48218e+09	1.5052e+09	1.10698e+09	1.05899e+09	1.16106e+09	1.31234e+09	1.29619e+09	3.45053e-14	3.07164e+08	4.90384e+07	2.00198e+07	15.9649	1.00782e+08	1.59898e+07	6.5278e+06	15.8657	1.27674e+09	1.62384e+08	6.62931e+07	12.7186	1.24012e+09	1.64567e+08
POS9102	Phe-Met	FM	0.996376	dipeptidyl peptidase III inhibitor	7.542	297.124	[M+H]+	297.127	True	56.05006:96425 61.01084:35884 69.63258:36571 86.09633:25051 89.05888:64369 91.05346:35305 93.06979:34000 102.05484:36295 103.03773:61402 103.05344:172769 104.05193:520108 120.08015:18595442 121.08353:1238758 130.04837:118020 133.02968:425676 150.05641:2178846 151.05844:71156 154.08426:81180 158.09557:85182 166.04732:76164 203.11537:548210 204.11784:62803 249.12051:207866 251.11656:252488 297.0805…	6.52003e+07	8.17578e+07	8.46141e+07	9.19589e+07	7.41407e+07	9.35945e+07	4.63987e+06	8.77994e+06	2.71746e+06	2.66938e+06	5.37817e+06	7.40078e+06	2.85712e+08	3.3162e+08	3.61658e+08	3.39592e+08	4.03657e+08	3.35327e+08	3.45532e+08	3.65088e+08	3.6097e+08	3.18118e+08	3.54549e+08	3.6877e+08	7.08635e-18	8.18777e+07	1.08112e+07	4.41366e+06	13.2041	5.26427e+06	2.47173e+06	1.00908e+06	46.9529	3.42928e+08	3.87535e+07	1.58211e+07	11.3008	3.52171e+08	1.85965e+07
POS6527	Phe-Pro	FP	0.993916	ACE inhibitor	8.622	245.126	[M+H-H2O]+	245.129	True	68.71753:76254 70.06499:6977140 71.06849:192686 86.09634:448830 91.0543:72350 98.05959:1968034 99.06274:84326 120.08019:8801165 121.08365:564436 125.06888:30310 131.04831:177045 132.08026:134142 144.07968:128152 148.07469:34886 153.06445:85230 154.07164:1226157 155.07585:46247 157.07495:33983 159.09007:1039098 160.07469:69652 160.0939:68076 172.10965:390440 184.07289:177250 185.06932:413748 186.0…	1.47233e+08	1.65658e+08	1.40391e+08	1.37472e+08	1.42711e+08	1.88589e+08	6.15304e+06	1.01984e+07	1.06151e+06	1.43029e+07	1.03999e+07	9.40373e+06	6.56156e+08	9.79887e+08	7.05543e+08	7.8339e+08	6.56414e+08	7.45094e+08	8.73115e+08	7.58361e+08	7.04894e+08	7.16416e+08	7.28393e+08	7.2664e+08	5.76783e-15	1.53676e+08	1.98156e+07	8.08967e+06	12.8944	8.58659e+06	4.51174e+06	1.84191e+06	52.544	7.54414e+08	1.2117e+08	4.94676e+07	16.0615	7.51303e+08	6.22768e+07
POS8241	Leu-Phe	LF	0.986934	ACE inhibitor	7.835	279.167	[M+H]+	279.17	True	56.05003:18576 57.05757:8054 57.06984:7186 67.6897:54974 69.07:364068 70.07328:9240 72.08092:8575 74.00552:9623 81.06947:22322 86.09627:6652330 87.04353:20754 87.0966:22767 87.09891:290278 88.03861:21488 89.05962:11331 91.05423:6747 93.06974:6478 95.08552:32691 97.02795:11771 97.06422:5817 103.0387:37590 109.09963:6212 120.01016:125766 120.08004:293251 121.0835:24755 123.07913:5939 131.04672:7924…	1.52329e+09	1.9773e+09	1.4056e+09	1.79703e+09	1.41038e+09	2.23345e+09	3.9536e+08	5.70705e+08	4.11947e+08	3.91063e+08	4.39454e+08	3.98665e+08	4.78047e+09	7.66503e+09	5.63151e+09	5.71568e+09	5.53157e+09	6.13254e+09	6.00527e+09	5.84854e+09	5.49986e+09	6.19783e+09	6.55714e+09	7.14482e+09	7.91229e-14	1.72451e+09	3.37359e+08	1.37726e+08	19.5626	4.34532e+08	6.89749e+07	2.81589e+07	15.8734	5.90947e+09	9.65819e+08	3.94294e+08	16.3436	6.20891e+09	5.7817e+08
POS9103	Met-Phe	MF	0.996643	ACE inhibitor /dipeptidyl peptidase IV inhibitor	7.749	297.124	[M+H]+	297.127	True	56.04964:2506519 57.0531:62445 61.01073:933155 68.55194:54123 70.06496:74641 72.08089:113461 74.05992:166837 86.09631:60655 89.05965:56572 91.05344:23649 103.0377:60086 104.05196:6388720 105.05627:205229 120.08009:705654 121.08353:53144 126.0536:51158 130.06351:23098 132.08009:23344 137.05809:21461 166.08377:946894 167.08708:69478 175.08585:49338 186.08813:20431 203.11467:61027 206.09576:61395 21…	6.03846e+07	5.12879e+07	4.55791e+07	6.40558e+07	5.51111e+07	6.62395e+07	2.54229e+07	4.47208e+07	2.82233e+07	2.52566e+07	2.78663e+07	2.73528e+07	2.4846e+08	3.82452e+08	2.51026e+08	2.2425e+08	2.34756e+08	2.7838e+08	2.45628e+08	2.34777e+08	2.51514e+08	2.70553e+08	2.58104e+08	2.27607e+08	3.04991e-12	5.71097e+07	7.91416e+06	3.23094e+06	13.8578	2.98071e+07	7.41142e+06	3.0257e+06	24.8646	2.69887e+08	5.80946e+07	2.3717e+07	21.5255	2.48031e+08	1.56168e+07
POS6239	Gly-Tyr	GY	0.741592	ACE inhibitor	7.016	239.099	[M+H]+	239.103	True	68.06895:315488 70.06496:91279 84.08064:63264 89.05962:1637408 91.05425:222824 110.07014:90425 119.04848:631958 121.06331:67537 123.04292:771768 133.08488:729026 136.07425:15907256 137.07777:874073 147.04265:735636 156.07512:104838 165.05328:7474448 166.05746:484155 172.33253:61308 177.10928:71485 182.07812:10509236 183.08224:679200 193.09592:5356082 194.09761:411407 221.08856:85655 222.07396:650…	1.54709e+08	1.5192e+08	1.31473e+08	1.37869e+08	1.49223e+08	2.04334e+08	1.74577e+08	2.93064e+08	3.06677e+08	3.42059e+08	2.80849e+08	3.00962e+08	9.76024e+08	1.55539e+09	8.40577e+08	8.68507e+08	9.21044e+08	8.54848e+08	7.85229e+08	908202658	6.24858e+08	9.7139e+08	8.23017e+08	8.12241e+08	6.47436e-09	1.54921e+08	2.57826e+07	1.05257e+07	16.6424	2.83031e+08	5.69785e+07	2.32614e+07	20.1315	1.00273e+09	2.75317e+08	1.12398e+08	27.4567	8.20823e+08	1.18367e+08
POS8969	Phe-Gln	FQ	0.916057	dipeptidyl peptidase IV inhibitor /ACE inhibitor	7.071	294.142	[M+H]+	294.145	True	56.04964:15622 60.04437:9296 69.07001:9648 69.15665:11681 70.06497:88691 72.08092:81591 72.99201:7049 74.05991:15367 84.04422:131637 84.08069:598383 85.08397:31453 86.09636:184822 88.03898:44103 99.05428:10574 100.02059:12480 101.07053:42095 101.10615:40386 102.05382:22303 103.05356:8128 110.07013:9830 112.08523:12637 115.08609:7631 116.06891:9990 120.08022:957392 121.08253:43985 122.02534:13410 …	3.41581e+07	3.18803e+07	2.04637e+07	6.5134e+07	3.04626e+07	6.90333e+07	9.07165e+07	1.66181e+08	1.18442e+08	10588497	1.08476e+08	1.14548e+08	1.98135e+08	3.86947e+08	2.18332e+08	1.82159e+08	2.06205e+08	1.99829e+08	192371986	2.24393e+08	1.94819e+08	2.28828e+08	2.24997e+08	1.70702e+08	2.99575e-06	4.18553e+07	2.0133e+07	8.21926e+06	48.1014	1.01492e+08	5.11287e+07	2.08732e+07	50.3771	2.31934e+08	7.68464e+07	3.13724e+07	33.1328	2.06019e+08	2.35669e+07
POS7628	Phe-Thr	FT	0.821956	renin inhibitor	7.069	267.131	[M+H]+	267.134	True	56.04966:147235 58.06528:40057 68.2438:279596 69.07005:60778 70.06503:291764 72.08096:52218 73.02821:316158 74.05996:398421 77.03869:65366 81.03354:47125 84.04411:55628 84.08067:65708 86.09621:256241 87.04358:43631 89.05883:231251 91.05428:74117 93.06979:62192 96.04401:304580 102.05401:403697 103.05314:281482 104.07012:266246 108.04394:67694 112.07534:306585 120.06521:2297440 120.08022:38291400 1…	1.77614e+08	1.664e+08	1.50914e+08	1.88373e+08	1.77712e+08	2.2561e+08	8.72427e+07	1.40631e+08	5.30776e+08	2.59473e+08	2.10485e+08	1.08761e+08	5.2747e+08	7.48124e+08	5.49698e+08	5.28406e+08	5.47186e+08	5.38769e+08	4.94752e+08	5.50017e+08	5.03617e+08	5.52515e+08	5.0887e+08	4.20235e+08	5.54429e-07	1.81104e+08	2.52386e+07	1.03036e+07	13.936	2.22895e+08	1.63999e+08	6.69523e+07	73.5769	5.73276e+08	8.61516e+07	3.51713e+07	15.028	5.05001e+08	4.81482e+07
POS11013	Trp-Met	WM	0.995136	dipeptidyl peptidase IV inhibitor /ACE inhibitor /dipeptidyl peptidase III inhibitor	7.84	336.134	[M+H]+	336.138	True	55.01821:6687 56.04972:50691 61.01082:27959 68.77697:20790 70.06496:25644 72.08094:10321 73.02811:10555 84.08064:6347 86.09621:44326 98.09545:6508 104.05212:92898 116.07011:17730 120.08015:29662 130.06349:186237 131.0667:5604 132.0788:219495 133.0296:11623 133.08345:10557 133.09802:5229 136.07423:5323 141.06398:24287 142.06406:21532 143.11694:22668 144.06343:10626 144.07997:101421 145.08229:8776 …	1.4088e+07	1.53799e+07	1.30604e+07	1.61233e+07	1.54374e+07	1.83504e+07	2.80151e+06	2.21648e+06	3.39586e+06	916528	4.38025e+06	3.2057e+06	4.97669e+07	2.31249e+07	5.61685e+07	5.52361e+07	6.17378e+07	6.34196e+07	5.03885e+07	4.08411e+07	3.20627e+07	5.38335e+07	5.41715e+07	6.61265e+07	1.28531e-08	1.54066e+07	1.81246e+06	739932	11.7642	2.81939e+06	1.17495e+06	479672	41.674	5.15756e+07	1.47699e+07	6.0298e+06	28.6374	4.95706e+07	1.18054e+07
POS5213	Thr-Pro	TP	0.265735	dipeptidyl peptidase IV inhibitor /ACE inhibitor	1.99	217.116	[M+H]+	217.118	True	56.04964:155552 57.03349:18675 58.06527:16391 60.04439:24321 69.51807:19088 70.06493:1105855 71.04917:16950 72.08095:72093 74.05991:2089262 75.06316:51870 81.03352:13950 84.04408:164044 84.08064:17940 86.05995:14451 87.04356:20433 88.03943:13679 90.05476:20820 98.05953:23327 100.07471:12901 106.04929:49532 112.07513:28471 112.08638:27654 113.06971:24651 114.05427:112954 114.09029:28602 115.08611:…	2.62942e+08	1.1536e+08	1.37865e+08	1.6508e+08	2.69133e+08	3.10952e+08	1.27294e+07	5.88784e+06	1.99129e+06	1.34427e+06	6.4314e+06	1.47704e+06	8.94278e+08	1.02212e+09	6.41594e+08	1.10985e+09	1.07824e+09	7.60921e+08	1.10642e+09	5.29751e+08	1.19217e+09	5.13053e+08	1.13176e+09	8.38371e+08	1.71898e-08	2.10222e+08	8.08315e+07	3.29993e+07	38.4505	4.97688e+06	4.41375e+06	1.80191e+06	88.6851	9.17835e+08	1.87063e+08	7.63681e+07	20.3809	8.85253e+08	3.06916e+08
POS6542	Ile-Leu	IL	0.392515	Glucose uptake stimulating peptide /dipeptidyl peptidase IV inhibitor /ACE inhibitor	7.666	245.183	[M+H]+	245.186	True	60.59763:69323 69.32832:132464 69.33161:109248 70.06503:146557 84.08073:69658 84.77749:77893 86.09638:37149528 87.09908:1523202 121.06344:292822 132.10045:1488540 175.80673:74513 199.17889:500462 227.17282:80682 240.61763:88111 245.09711:152089 245.18413:2953059 246.13026:121906 246.18521:173594	1.61203e+09	2.12292e+09	1.81548e+09	1.65361e+09	1.72108e+09	2.00018e+09	7.22797e+08	9.93905e+08	6.66231e+08	8.23971e+08	8.01724e+08	9.06318e+08	5.56824e+09	5.56426e+09	5.52729e+09	6.66212e+09	6.29545e+09	5.48205e+09	5.69336e+09	4.02842e+09	4.00792e+09	4.62273e+09	5.58992e+09	4.38461e+09	5.09496e-14	1.82088e+09	2.02464e+08	8.26555e+07	11.119	8.19158e+08	1.19275e+08	4.86938e+07	14.5607	5.8499e+09	5.01701e+08	2.04819e+08	8.57623	4.72116e+09	7.49863e+08
POS5781	Pro-Leu	PL	0.811148		2.882	229.152	[M+NH4]+	229.155	True	58.06528:35943 60.08106:73386 69.07001:4831 69.47959:5578 70.06494:154996 72.08092:13055 72.93703:4144 84.04407:12843 84.08062:18424 86.05993:12387 86.09631:100571 90.9472:4511 98.0595:14039 100.0747:44954 112.0751:4028 114.05421:22845 116.06907:21224 124.07474:42774 126.08982:6209 128.06934:14233 140.1059:25170 142.08496:311328 143.08769:20467 152.06885:10839 155.0318:6541 155.97342:5918 166.047…	4.40631e+08	5.37167e+08	4.614e+08	3.39362e+08	2.46619e+08	4.7365e+08	5.34026e+08	4.9049e+08	4.70616e+08	2.47794e+08	4.82979e+08	4.81995e+08	1.329e+08	1.26946e+08	2.50251e+08	1.17793e+08	2.99892e+08	3.23719e+08	9.4184e+07	2.43322e+08	1.32693e+08	1.74462e+08	2.58964e+08	3.03477e+08	0.000129855	4.16472e+08	1.05104e+08	4.29087e+07	25.2369	4.51317e+08	1.02091e+08	4.16784e+07	22.6207	2.08584e+08	9.37713e+07	3.8282e+07	44.9562	2.01184e+08	8.05384e+07
POS11709	Trp-Phe	WP	0.993385	dipeptidyl peptidase IV inhibitor	8.441	352.162	[M+H]+	352.166	True	69.78046:17192 70.06494:10614 84.08062:11967 86.09628:34113 91.05341:29588 103.05355:10298 118.06416:16818 120.08015:665175 121.08351:63599 130.06349:1481342 131.06667:132331 132.08009:971463 133.08214:80113 136.06065:16396 142.06386:73582 144.07976:1889047 145.08249:157406 146.05836:452920 147.06131:38707 159.08997:4841558 160.0752:83129 160.09402:413222 164.06818:13636 166.08377:49718 170.05736…	5.34401e+07	5.58502e+07	6.5751e+07	6.92417e+07	5.85328e+07	7.21797e+07	1.27415e+07	1.46047e+07	1.32633e+07	1.24141e+07	1.57777e+07	1.25771e+07	2.36199e+08	8.50597e+07	2.83944e+08	2.8985e+08	3.1526e+08	2.33029e+08	2.2577e+08	1.47398e+08	1.09609e+08	1.99044e+08	2.1149e+08	2.36359e+08	1.8262e-07	6.24993e+07	7.63879e+06	3.11852e+06	12.2222	1.35631e+07	1.34511e+06	549139	9.91746	2.40557e+08	8.26412e+07	3.37381e+07	34.3541	1.88279e+08	4.94614e+07
POS5876	Val-Ile	VI	0.0627387	dipeptidyl peptidase IV inhibitor	7.424	231.168	[M+H]+	231.17	True	55.05431:2663268 57.05764:171166 69.07008:147476 69.71094:158877 70.06503:387585 71.06854:99807 72.08044:55939220 73.07793:94605 73.08385:1908413 86.09639:15193533 87.09913:1233944 116.06895:662652 117.07292:651172 118.07404:622301 118.08498:309416 132.10042:4393896 133.10396:167017 185.16249:1706940 213.15863:103817 231.16774:3586820 232.11674:151201 232.17041:417631	2.48514e+09	2233596480	2.08599e+09	2.28529e+07	1.84163e+09	2.617e+09	1.96414e+09	2.41718e+09	2.38322e+09	2.0019e+09	2376749008	2.76391e+09	7.87948e+09	1.3079e+10	9.22892e+09	1.65955e+08	7.3517e+09	9.03638e+09	9.88256e+09	1.14741e+10	1.03712e+10	1.70702e+08	9.16498e+09	6.95149e+09	0.00149119	1.88103e+09	9.51555e+08	3.88471e+08	50.5868	2.31785e+09	2.97156e+08	1.21314e+08	12.8203	7.79025e+09	4.24085e+09	1.73132e+09	54.4379	8.00251e+09	4.12288e+09
POS7286	Lys-Leu	KL	0.234552	ACE inhibitor	2.928	260.194	[M+H]+	260.197	True	56.04951:146760 67.05411:74807 68.30289:57872 68.30663:39682 70.06499:93346 72.0804:30324 84.0807:18729016 85.06468:70363 85.08102:54868 85.084:724261 86.09634:826132 101.1063:1006176 102.09016:146849 112.07521:124782 116.06918:179479 129.10112:3893614 130.08475:1072932 130.10489:161458 132.10014:108040 141.1006:27454 147.11058:3076330 148.11427:155526 173.09047:35536 175.1167:24251 180.13643:361…	6.68908e+08	6.04513e+08	5.50306e+08	6.37811e+08	5.62347e+08	6.7376e+08	1.21135e+06	2.94479e+06	857782	1.15419e+06	780382	2.13458e+06	2.13809e+09	5.20154e+09	1.62219e+09	1.20338e+09	1.4626e+09	1.69085e+09	1.46111e+09	2.00903e+09	2.15556e+09	1.99954e+09	1.65139e+09	1.68921e+09	0.000162225	6.16274e+08	5.27957e+07	2.15538e+07	8.56693	1.51385e+06	851136	347475	56.2234	2.21977e+09	1.4927e+09	6.09393e+08	67.2457	1.82764e+09	2.66294e+08
POS5784	Ile-Pro	IP	0.583792	ACE inhibitor /dipeptidyl peptidase IV inhibitor	7.202	229.152	[M+H]+	229.155	True	68.77155:441213 69.07001:155497 70.06496:8482452 71.06847:301462 72.08093:282859 86.09629:16703769 87.09952:676787 116.07012:25735520 117.07294:1258630 229.15344:4283218 230.15685:464979	3.0955e+10	3.6329e+10	3.72064e+10	3.09073e+10	3.1701e+10	3.51179e+10	4.29902e+09	6.21153e+09	4.22347e+09	3.71049e+09	5.03022e+09	5.2487e+09	4.84387e+10	6.93731e+10	4.35598e+10	5.11155e+10	4.42738e+10	4.5091e+10	5.1243e+10	5.58433e+10	5.0314e+10	5.47935e+10	5.02113e+10	4.84545e+10	2.7886e-12	3.37028e+10	2.84771e+09	1.16257e+09	8.44948	4.78724e+09	8.96232e+08	3.65885e+08	18.7213	5.03086e+10	9.76514e+09	3.9866e+09	19.4105	5.18099e+10	2.88248e+09
POS7335	Ile-Glu	IE	0.0501024	ACE inhibitor	6.729	261.142	[M+H]+	261.144	True	56.05002:283359 57.05757:185099 69.04768:196866 69.06998:4243730 70.07327:216619 84.04407:993950 86.09625:106824568 87.09361:352282 87.09892:4549282 97.06421:218445 102.05379:1168573 130.04791:2389078 148.05911:18302270 149.06267:672279 215.13765:528917 243.13255:264636 261.14328:9135216 262.14679:1164045	3479814079	8.08662e+09	3.34103e+09	1.19258e+09	1.56269e+09	2.42995e+09	8.87189e+07	8.35661e+07	7.81732e+07	3.91205e+07	1.08062e+08	1.46005e+08	8.97939e+09	6.18327e+09	4.97927e+09	2.10137e+09	6.24985e+09	7.00547e+09	4.22253e+09	1.04556e+10	4.27266e+09	2.50513e+09	3.88604e+09	9.23224e+09	0.00100094	3.34878e+09	2.49591e+09	1.01895e+09	74.532	9.06076e+07	3.53049e+07	1.44132e+07	38.9647	5.91643e+09	2.28836e+09	9.34221e+08	38.6781	5.76236e+09	3.2492e+09
POS9013	Tyr-Leu	YL	0.57536	ACE inhibitor /Anxiolytic peptide /dipeptidyl peptidase IV inhibitor /dipeptidyl peptidase III inhibitor	7.448	295.161	[M+H]+	295.165	True	68.94393:97271 70.065:36408 74.02311:29259 84.04414:263598 86.09639:647946 91.05376:204080 107.04862:30574 119.04752:286448 120.08022:1294598 121.06363:196432 121.08234:79272 130.04811:134946 130.08469:103664 131.04684:37130 132.10014:216333 136.07433:8912889 137.07811:638133 166.08392:1016109 167.08719:50201 186.08824:117645 202.07007:77963 232.09163:150937 249.15718:137769 250.07356:45361 278.1…	1.73489e+08	2.40749e+08	2.10341e+08	2.56073e+08	1.77747e+08	3.03557e+08	2.98608e+08	3.43615e+08	3.02343e+08	3.05157e+08	2.68358e+08	3.23968e+08	1.44991e+09	2.04963e+09	1.36382e+09	1.34334e+09	1.52833e+09	1.72799e+09	1.68389e+09	1.53828e+09	1.29835e+09	1.60491e+09	1.51918e+09	1.48751e+09	1.19786e-13	2.26993e+08	4.99242e+07	2.03815e+07	21.9937	3.07008e+08	2.53666e+07	1.03559e+07	8.26254	1.57717e+09	2.70087e+08	1.10263e+08	17.1248	1.52202e+09	1.3005e+08
POS7728	His-Leu	HL	0.374865	antioxidative /ACE inhibitor/ dipeptidyl peptidase IV inhibitor /dipeptidyl peptidase III inhibitor	2.967	269.158	[M+H]+	269.161	True	56.04967:61981 69.47635:79478 81.04462:64441 83.05972:584779 86.09644:363021 93.04404:388482 95.05975:66740 110.07018:34249588 111.07146:589484 121.03812:163178 136.07414:682903 138.06496:1964114 156.07521:2902272 157.0787:76638 166.05879:276630 178.1308:970635 206.12648:271935 223.15138:3288904 224.15642:282430 234.12181:135729 251.14589:3558352 252.15001:370758 253.08978:93392 269.15604:8201262…	1.2379e+06	1.8342e+06	1.08873e+06	2.81828e+08	2.30079e+08	1.11311e+08	9.78522e+07	1.06775e+08	9.34799e+07	9.78982e+07	3.64312e+07	9.33632e+07	1.17878e+09	1.62815e+09	1.01872e+09	8.44924e+08	1.04649e+09	1.22304e+09	1.01298e+09	1.11451e+09	1.23534e+09	1.256e+09	1.11859e+09	1.18139e+09	5.97071e-12	1.04563e+08	1.25825e+08	5.13676e+07	120.333	8.76332e+07	2.55533e+07	1.04321e+07	29.1594	1.15669e+09	2.66661e+08	1.08864e+08	23.0539	1.15314e+09	8.99597e+07
POS4741	Gly-Met	GM	0.953169	ACE inhibitor	3.121	207.078	[M+H]+	207.08	True	56.04967:365729 61.01066:171307 68.0492:79473 68.5816:39363 69.07005:9856 70.06499:17826 74.0237:39084 74.05996:33284 75.02619:17463 84.04413:16975 85.07584:10330 87.02589:30781 96.04391:46565 98.05945:123143 102.05388:243385 104.05199:1460479 105.05581:44155 113.06974:2210127 114.05337:14058 114.07303:88465 130.04791:62336 133.02962:1150480 134.03358:45374 141.06406:44838 144.06343:391128 150.05…	1.01171e+06	2808.77	2808.77	836489	2808.77	1.11754e+06	899574	2.45427e+06	888532	1.97437e+06	539392	628645	3.71637e+08	4.35232e+08	3.33376e+08	3.63807e+08	3.64253e+08	3.63515e+08	3.54723e+08	3.36585e+08	2.50192e+08	3.41353e+08	2.81828e+08	3.41181e+08	3.08795e-17	495694	547341	223451	110.419	1.2308e+06	789590	322349	64.1528	3.7197e+08	3.37326e+07	1.37713e+07	9.06864	3.17644e+08	4.16708e+07
POS10131	Ile-Trp	IW	0.944175	ACE inhibitor /dipeptidyl peptidase IV inhibitor	8	318.177	[M+H]+	318.181	True	50.72015:6463 56.04968:23593 57.05762:9008 68.9271:18364 69.07005:329717 70.065:9407 70.07334:9850 72.08041:7556 84.07996:8008 86.09636:5829218 87.0436:6166 87.09292:25539 87.09906:260282 97.06431:6815 105.0691:7885 107.04861:8100 109.06407:7376 113.10626:19490 116.06899:9290 118.06426:9403 121.06339:12903 130.0481:6535 130.06348:63029 132.07892:48173 136.07431:9840 141.10074:177855 143.07156:769…	4.25716e+08	4.75061e+08	3.56156e+08	586610460	5.32755e+08	6.34149e+08	9.16683e+07	1.13656e+08	9.92472e+07	1.06096e+08	1.00959e+08	1.02478e+08	1.63798e+09	2.52951e+09	1.78388e+09	1.63517e+09	1.7693e+09	2.07639e+09	2.21595e+09	1.78523e+09	2.16919e+09	1.89834e+09	1.99065e+09	2.26558e+09	1.44122e-13	5.01741e+08	1.03328e+08	4.21834e+07	20.5939	1.02351e+08	7.31471e+06	2.98622e+06	7.14671	1.90537e+09	3.45422e+08	1.41018e+08	18.1289	2.05416e+09	1.92219e+08
NEG1778	Gly-Val	GV		ACE inhibitor /dipeptidyl peptidase IV inhibitor	2.545	173.089	[M-H]-	173.093	True	68.11839:142095 69.03182:24822 73.03816:841923 74.02188:94137 83.04713:20658 85.02695:277302 89.02192:32111 96.83691:22313 100.07358:130302 109.54985:23375 111.00513:41872 111.04175:22553 111.07838:42431 113.02106:31889 116.06819:4340833 127.08488:42193 129.01572:89496 129.10046:5188066 156.06227:29239 171.11003:20743 173.08852:7920709 174.09293:27023	1.4263e+07	1.89695e+07	2.51729e+07	2.75086e+08	1.81472e+07	3.68244e+08	4.24127e+07	3.87972e+07	2.64835e+07	4.037e+07	4.81299e+07	4.38366e+07	4.0032e+08	3.76905e+08	3.39565e+08	3.32772e+08	3.98462e+08	4.4945e+08	5.17578e+08	5.06028e+08	4.28996e+08	5.05461e+08	5.53855e+08	5.12281e+08	1.36101e-08	1.1998e+08	1.59016e+08	6.4918e+07	132.535	4.0005e+07	7.3609e+06	3.00508e+06	18.4	3.82912e+08	4.33618e+07	1.77024e+07	11.3242	5.04033e+08	4.09153e+07
POS3890	Ala-Val	AV	0.0636342	ACE inhibitor /dipeptidyl peptidase IV inhibitor	2.928	189.121	[M+H]+	189.123	True	55.05463:352245 69.48568:177685 72.08096:14903463 73.0844:338110 91.04852:75753 118.08492:22176336 119.08929:561181 143.11681:5465648 144.09958:92097 144.11926:265024 171.11185:162364 180.33836:70890 189.12186:2106245 190.12273:84860	2.24597e+08	2.4559e+08	2.00034e+08	2.44905e+08	2.19804e+08	2.32916e+08	4.08498e+07	3.98407e+07	2.63801e+07	2.16297e+07	2.33762e+07	4.47456e+07	1.85695e+09	1.81009e+09	1.65746e+09	1.60296e+09	1.69634e+09	1.66915e+09	1.40889e+09	1.37311e+09	1.28446e+09	1.47413e+09	1.32841e+09	1.5098e+09	7.70257e-22	2.27974e+08	1.72056e+07	7.02416e+06	7.54717	3.28037e+07	1.0118e+07	4.13064e+06	30.844	1.71549e+09	9.74745e+07	3.97938e+07	5.68202	1.39647e+09	8.57363e+07
POS9003	Phe-Glu	FE	0.589707		7.127	295.125	[M+H]+	295.129	True	69.32391:22441 69.32664:19850 70.06499:25392 72.08098:53273 84.04415:141350 84.08067:24250 85.04756:14089 86.09634:21536 91.0543:20463 93.06895:20051 96.04391:18805 102.05389:173353 103.05332:89974 110.0702:24969 120.08017:11017014 121.08355:778253 129.10104:16736 130.04814:300786 131.04825:50640 132.07872:25185 144.0799:41190 148.05919:1373978 149.06232:48254 150.07545:78095 150.08942:168430 152…	4.24424e+07	4.36279e+07	4.54556e+07	5.48507e+07	5.41903e+07	6.22314e+07	1.7784e+08	2.21948e+08	2.0207e+08	1.40643e+08	1.69746e+08	1.84909e+08	2.08534e+08	2.99927e+08	2.3645e+08	2.02517e+08	2.03277e+08	1.87548e+08	2.31569e+08	2.25133e+08	1.85262e+08	2.34321e+08	2.17539e+08	1.81331e+08	1.84257e-09	5.04664e+07	7.84558e+06	3.20294e+06	15.5461	1.82859e+08	2.78589e+07	1.13733e+07	15.2351	2.23042e+08	4.09224e+07	1.67065e+07	18.3474	2.12526e+08	2.34019e+07
POS9894	Phe-Phe	FF	0.998974	ACE inhibitor /dipeptidyl peptidase IV inhibitor	8.151	313.151	[M+H]+	313.155	True	51.02365:20345 63.02357:15704 68.47973:84135 70.06497:64916 72.08096:17999 77.03868:19523 86.09632:30396 91.05427:55115 93.06969:93743 95.04917:15914 103.05343:300322 116.06895:17676 118.06421:17429 119.07195:16300 120.08013:30822456 121.08356:2108477 126.05362:64567 130.06352:19014 131.04822:45760 132.07867:15642 144.07822:25522 146.05844:51714 149.0571:49173 166.08389:2252461 167.08759:178780 1…	2.81034e+08	2.68551e+08	2.63072e+08	3.42765e+08	2.52382e+08	3.02618e+08	4.20287e+07	5.44329e+07	5.66553e+07	4.49437e+07	5.51373e+07	5.01278e+07	1.42868e+09	1.36103e+09	1.33005e+09	9.74006e+08	1.39691e+09	1.73772e+09	1.32556e+09	1.07119e+09	1.20678e+09	1.29043e+09	1.25329e+09	1.44258e+09	1.14306e-13	2.8507e+08	3.31005e+07	1.35132e+07	11.6114	5.05543e+07	5.96013e+06	2.43321e+06	11.7896	1.3714e+09	2.44074e+08	9.96429e+07	17.7975	1.26497e+09	1.24046e+08
POS8243	Phe-Leu	FL	0.989567	dipeptidyl peptidase III inhibitor	7.731	279.167	[M+H]+	279.17	True	67.92277:96111 67.92702:135182 70.06501:41461 86.09634:2746142 87.09911:117347 91.05432:39773 93.06898:57970 103.03778:110235 103.05352:212835 116.06902:46579 120.07905:31467648 121.08244:2190973 130.0847:38810 132.1004:1571115 133.10394:38917 136.07434:53280 149.02267:31555 216.13518:54053 233.16336:986837 234.16264:120314 262.1391:87806 279.16858:1664989 280.16974:225770	3.42422e+08	2.98957e+08	2.56276e+08	4.26395e+08	3.34893e+08	4.18394e+08	6.02098e+07	7.8455e+07	6.01815e+07	5.91998e+07	5.95987e+07	6.8642e+07	1.39997e+09	1.85589e+09	1.29735e+09	1.12521e+09	1.11077e+09	1.40266e+09	1.21558e+09	1.174e+09	1.34718e+09	1.18686e+09	1.291e+09	1.12877e+09	7.95058e-13	3.46223e+08	6.64884e+07	2.71438e+07	19.2039	6.43811e+07	7.75865e+06	3.16746e+06	12.0511	1.36531e+09	2.72149e+08	1.11104e+08	19.9331	1.2239e+09	8.08472e+07
POS5112	Pro-Val	PV	0.20792	dipeptidyl peptidase IV inhibitor	7.048	215.137	[M+H]+	215.139	True	55.0546:321281 56.04963:32818 70.0649:1207146 72.08089:6891226 73.08373:217673 74.0599:41981 84.04407:27167 84.08061:102853 86.09619:221532 95.71084:22845 96.84149:61015 101.07047:40646 104.03383:75522 113.05827:27107 116.07007:13451272 117.07272:573220 126.08981:28350 129.10126:132674 143.1169:31172 152.10442:30626 170.07835:107443 170.11623:29966 187.14223:119480 198.07368:43081 198.1111:131158…	9.59956e+09	1.17764e+10	1.18112e+10	1.05216e+10	1.01848e+10	1.38602e+10	9.71625e+08	1.58154e+09	1.13348e+09	1.27401e+09	1.35781e+09	1.24857e+09	27131998268	2.87242e+10	2.86417e+10	2.71021e+10	2.79213e+10	2.4937e+10	2.4908e+10	2.58294e+10	2.51426e+10	2.34137e+10	2.53231e+10	2.24338e+10	1.23272e-19	1.12923e+10	1.53516e+09	6.26725e+08	13.5947	1.26117e+09	2.06127e+08	8.41512e+07	16.3441	2.74097e+10	1.39955e+09	5.71364e+08	5.10604	2.45084e+10	1.30177e+09
NEG7118	His-Tyr	HY	0.299665		2.403	317.121	[M-H]-	317.125	True	71.02243:4259 72.39771:3182 74.02204:50280 80.03506:7828 81.04282:22286 89.02113:16778 90.02532:3826 93.03128:3592 104.78477:3269 108.05382:168241 119.04697:45507 135.06491:18030 136.04837:20334 149.07942:16323 150.06313:4230 153.07524:312150 163.03662:36079 167.08931:41784 180.06361:276381 185.05307:4532 191.07936:18556 193.06895:34464 211.08006:39580 256.10565:19194 273.13187:115549 299.11075:4…	1.45553e+06	1.74999e+06	424812	346201	2.54816e+06	2.78281e+06	2808.77	2808.77	2808.77	2808.77	2808.77	2808.77	1.91404e+07	4.89174e+07	1.42377e+07	1.64382e+07	2.30262e+07	32509847	3.69315e+07	3.67434e+07	38586079	4.47984e+07	3.21979e+07	4.30216e+07	4.80494e-09	1.55125e+06	1.02764e+06	419533	66.246	2808.77	0	0	0	2.57116e+07	1.30596e+07	5.33155e+06	50.7925	3.87131e+07	4.58502e+06
NEG3714	Glu-Ser	ES	0.0377963		0.911	233.074	[M-H]-	233.078	True	69.90385:25966 71.01134:226891 71.02285:127829 72.00611:35012 73.03837:596464 74.02198:206206 75.00588:21763 78.95614:32157 88.03774:626524 96.95723:36519 96.96641:179699 102.05291:25508 104.03214:271787 110.02117:22451 113.03246:23147 115.00016:830648 117.06383:571057 118.04786:940001 127.04821:34171 128.03188:172428 131.04211:73464 132.02647:101864 135.02647:117054 141.06383:27530 145.05904:160…	9.93212e+07	1.08772e+08	8.64148e+07	1.06157e+08	1.3177e+08	1.24814e+08	6.82749e+07	5.65383e+07	1.14107e+08	1.13436e+08	8.55904e+07	4.45579e+07	2.94215e+08	5.12186e+08	2.63177e+08	3.11205e+08	3.01299e+08	2.95193e+08	3.65722e+08	4.1401e+08	3.91175e+08	4.29462e+08	4.09476e+08	3.98624e+08	2.73155e-10	1.09541e+08	1.66054e+07	6.77913e+06	15.159	8.04173e+07	2.91737e+07	1.19101e+07	36.2778	3.29546e+08	9.09119e+07	3.71146e+07	27.587	4.01412e+08	2.18948e+07
POS9457	N-Valyltryptophan	VW	0.802223		7.717	304.162	[M+H]+	304.166	True	55.05428:1302771 56.04969:44506 56.05805:43055 57.05764:75201 69.46099:73637 72.08044:19961022 73.07791:43658 73.08382:782377 86.09581:327446 99.09084:117239 116.06902:59444 117.05727:40149 118.06429:51454 127.08556:1102046 130.06337:418922 132.07884:407847 132.10036:39615 144.08018:273023 146.05856:1282784 147.06145:79781 158.1145:191667 159.09013:937340 160.09396:149311 161.09572:68806 170.0575…	7.05884e+08	8.14052e+08	6.55708e+08	9.79342e+08	8.4479e+08	1.07049e+09	2.46008e+08	3.81352e+08	3.1879e+08	2.47368e+08	2.95695e+08	3.36738e+08	5.15549e+09	6.95142e+09	5.16872e+09	5.15416e+09	5.10197e+09	5.49593e+09	5.53628e+09	5.30114e+09	4.97549e+09	5.56449e+09	5.48209e+09	5.29653e+09	5.00835e-17	8.45045e+08	1.58137e+08	6.45593e+07	18.7135	3.04325e+08	5.27493e+07	2.15348e+07	17.3332	5.50461e+09	7.22908e+08	2.95126e+08	13.1328	5.35934e+09	2.20515e+08
POS3680	L-Alanyl-L-norleucine				7.682	185.126	[M+H-H2O]+	185.129	True	55.05461:14968 56.04964:30012 57.06985:13354 60.0443:95824 68.04925:14725 69.06996:146783 70.06491:354288 72.04434:127959 72.08089:253162 79.05385:8994 82.06509:11290 84.04411:53175 84.08063:41037 85.02818:37829 86.09628:3729276 87.0551:28492 87.09441:10575 87.09897:107003 97.06424:35784 98.05955:69129 98.09544:24323 101.07049:12446 112.07511:12572 112.11119:1042918 113.11427:48262 114.05458:4859…	2.57936e+07	3.61063e+07	3.32638e+07	3.56948e+07	2.86949e+07	3.84036e+07	1.3622e+07	1.14397e+07	5.95221e+06	2.92684e+07	1.79126e+07	1.25822e+07	1.75768e+08	1.75708e+08	1.79015e+08	2.22048e+08	1.9418e+08	1.78742e+08	1.80985e+08	1.7318e+08	1.41704e+08	1.88701e+08	1.50325e+08	1.74832e+08	4.21783e-16	3.29928e+07	4.83001e+06	1.97184e+06	14.6396	1.51295e+07	7.92782e+06	3.23652e+06	52.3997	1.87577e+08	1.82401e+07	7.44651e+06	9.72409	1.68288e+08	1.82978e+07
POS6060	His-Pro	HP	0.566647		3.15	235.116	[M+H-H2O]+	235.115	True	69.05041:59149 70.06493:2910403 71.06846:47857 82.05204:602648 83.05968:198016 86.09627:1533764 87.09362:52767 87.09882:578475 88.1029:122478 93.0442:62922 95.05968:103088 110.07011:7674930 111.07349:274845 121.03802:124661 123.05325:116822 137.07022:109638 138.06483:638633 149.06911:135519 153.06435:37230 162.10083:1660655 163.10378:137839 166.05936:1623275 167.06245:46126 189.10977:43802 190.09…	4.08108e+08	2.27706e+08	1.3947e+08	9.19904e+07	1.36653e+08	8.65714e+08	6.33154e+07	6.09326e+07	2.76185e+07	2.91198e+07	4.4095e+07	4.54709e+07	2.36306e+09	2.20916e+09	2.59945e+09	2.76942e+09	2.29304e+09	2.24452e+09	2.54984e+09	2.08103e+09	1.83255e+09	2.10559e+09	2.12271e+09	2.58021e+09	2.69422e-14	3.11607e+08	2.93891e+08	1.1998e+08	94.3145	4.5092e+07	1.513e+07	6.1768e+06	33.5536	2.41311e+09	2.22988e+08	9.10345e+07	9.2407	2.21199e+09	2.93307e+08
NEG5012	His-Ile	HI	0.210974		2.493	267.142	[M-H]-	267.146	True	67.02736:12427 74.02188:4162 80.0351:80716 81.04279:133223 87.00549:2858 89.02192:41703 93.04311:28233 95.05956:2938 107.04663:4610 108.05374:210995 109.03834:8950 110.06933:13749 123.09025:2964 129.10054:3073 130.08418:1079072 136.04843:39434 138.06316:3832 140.06801:14022 141.10027:93069 153.07516:13074 154.05884:9223 169.09453:30098 176.05486:3029 177.05835:3884 178.13132:3226 180.06125:2705 1…	1.59654e+07	1.32182e+07	9.28239e+06	1.29975e+07	1.49607e+07	1.27819e+07	846325	2808.77	573338	1.19076e+06	330150	285746	2.56394e+07	4.02648e+07	1.81317e+07	2.15615e+07	2.75325e+07	4.48706e+07	5.97921e+07	6.62148e+07	4.70215e+07	5.62308e+07	5.70708e+07	5.0081e+07	1.73764e-11	1.3201e+07	2.29395e+06	936501	17.3771	538189	427943	174707	79.5155	2.96667e+07	1.06113e+07	4.33206e+06	35.7684	5.60685e+07	6.86355e+06
POS5220	Val-Val	VV	0.0252378	dipeptidyl peptidase IV inhibitor	7.054	217.152	[M+H]+	217.155	True	55.05462:777075 56.04963:63113 57.05758:67321 68.75099:68805 70.06493:177731 72.04442:108900 72.08092:17318780 73.07784:33203 73.08376:536224 84.04407:37868 84.08062:82848 86.09552:29117 98.0595:59669 100.02058:20443 114.09024:1699580 115.08607:226972 115.0931:79015 116.03333:21620 116.07001:131918 118.08482:671999 129.10095:32482 130.04799:23783 131.11642:806397 132.12038:26442 157.09509:810572 …	1.32733e+09	1.37847e+09	1.06155e+09	1.45611e+09	1.44618e+09	1.89645e+09	4.57724e+08	9.60603e+08	5.37331e+08	6.49198e+08	6.71313e+08	5.63919e+08	4.43628e+09	6.50268e+09	5.1503e+09	4.16474e+09	4.67912e+09	5.15042e+09	4.68107e+09	5.03305e+09	5.81062e+09	4.85592e+09	4.97326e+09	4.50927e+09	2.95403e-13	1.42768e+09	2.71086e+08	1.1067e+08	18.9878	6.40015e+08	1.7516e+08	7.15088e+07	27.3681	5.01392e+09	8.27105e+08	3.37664e+08	16.4962	4.9772e+09	4.51459e+08
POS5685	L-His-Ala	HA	0.184157		1.265	227.111	[M+CH3OH+H]+	227.114	True	69.1523:23770 70.06496:34204 82.05239:6669 83.06036:46659 84.04402:55096 84.08064:26261 88.03864:10268 93.04422:6462 95.05959:39017 98.09544:13235 110.07011:1904676 111.07341:62587 112.08636:20507 122.07011:8733 136.08467:97290 138.0645:62873 138.10033:8450 148.08487:7487 156.07506:1812152 157.07872:91753 164.08025:38782 165.11166:30037 166.05936:134003 169.09396:6473 180.04005:8246 181.10548:186…	7.2154e+07	7.12277e+07	6.26482e+07	6.4292e+07	7.50031e+07	7.50759e+07	7.25099e+07	9.74509e+07	6.48433e+07	5.8963e+07	6.91655e+07	8.43781e+07	1.44386e+08	1.56645e+08	1.54772e+08	1.49504e+08	1.82821e+08	1.49518e+08	1.31568e+08	1.2102e+08	1.14029e+08	1.62087e+08	1.414e+08	1.5988e+08	5.36533e-10	7.00668e+07	5.35809e+06	2.18743e+06	7.64711	7.45518e+07	1.4081e+07	5.74853e+06	18.8875	1.56274e+08	1.37108e+07	5.59741e+06	8.77356	1.38331e+08	1.98703e+07
POS8908	PyroGlu-Tyr				7.357	293.11	[M+H]+	293.113	True	55.05462:50037 61.01082:54935 67.63799:109675 67.64221:49352 70.06496:86067 72.08037:22213 73.02812:24380 82.06509:49284 83.08496:193311 84.04417:966938 84.0807:665568 84.08795:17395 85.04752:26711 86.09642:130952 88.03864:69169 91.02048:22663 95.15208:15918 101.0705:176482 101.10617:22207 107.04877:115173 110.07125:17866 116.01558:52278 116.07011:19178 119.04729:58997 120.08027:748387 123.04256:…	2.17363e+07	2.80702e+07	2.30855e+07	3.00548e+07	2.17879e+07	3.3769e+07	6.32743e+07	1.91672e+06	1.11032e+06	1.34435e+06	581765	611114	1.00865e+08	123651807	8.9434e+07	1.39668e+08	1.17978e+08	9.24931e+07	108450237	1.07525e+08	9.12901e+07	1.07697e+08	1.05954e+08	1.03177e+08	4.90167e-10	2.64173e+07	4.98909e+06	2.03679e+06	18.8857	1.14731e+07	2.53821e+07	1.03622e+07	221.232	1.10682e+08	1.96994e+07	8.04225e+06	17.7983	1.04016e+08	6.51058e+06
POS8142	L-pyroglutamyl-L-phenylalanine				8.152	277.115	[M+H]+	277.118	True	56.04967:68038 69.3699:62374 72.08097:36105 79.05389:33753 84.04411:8130404 85.04736:297731 86.09634:160401 91.05429:46402 93.06895:56838 103.05361:175641 107.04859:115413 107.08431:38760 120.08017:18874402 121.08354:1392038 121.10001:36562 131.04805:331585 136.0744:210794 146.05864:432797 148.07297:107532 149.05885:411731 152.05482:257344 164.07225:40922 166.08388:13501725 167.0871:997062 174.05…	2.85065e+08	2.94523e+08	2.74959e+08	3.53185e+08	2.53376e+08	3.92849e+08	1.36053e+07	1.66284e+07	1.84848e+07	1.6412e+07	1.80383e+07	1.54969e+07	1.06224e+09	9.92101e+08	9.66686e+08	9.02139e+08	1.02846e+09	1.04618e+09	8.99591e+08	8.86298e+08	9.07765e+08	9.64263e+08	8.9472e+08	1.01816e+09	8.07222e-20	3.08993e+08	5.29494e+07	2.16165e+07	17.1361	1.64443e+07	1.77182e+06	723344	10.7747	9.99635e+08	5.92703e+07	2.4197e+07	5.9292	9.28465e+08	5.19711e+07
POS7334	Gamma-Glu-Leu	EL	0.0728272	antioxidative	7.322	261.141	[M+H]+	261.144	True	56.04968:207535 69.07007:154523 69.09839:142992 72.08041:76798 84.04416:9528270 85.04778:236368 86.06009:536919 86.09639:25535798 87.09909:1135734 102.05394:507429 114.05454:85546 120.07898:83557 130.04817:4299570 130.06358:160507 131.05255:81729 132.10037:18946960 133.10406:1060460 142.04813:826004 144.07826:801185 148.05765:179694 152.10461:351007 159.09009:1093917 169.08385:597772 170.05779:36…	5.42394e+09	6.71251e+09	5.42168e+09	4.19271e+09	5.10922e+09	6.52258e+09	6.09653e+08	6.11713e+08	4.99138e+08	3.73424e+08	4.80992e+08	5.44964e+08	1.30516e+09	1.50145e+09	1.19141e+09	1.36687e+09	1.23221e+09	1.34484e+09	1.5591e+09	1.3863e+09	1.17517e+09	1.49449e+09	1.65135e+09	1.32385e+09	2.01954e-13	5.56377e+09	9.34352e+08	3.81448e+08	16.7935	5.19981e+08	9.00152e+07	3.67486e+07	17.3113	1.32366e+09	1.09654e+08	4.47661e+07	8.28419	1.43171e+09	1.71999e+08
POS9004	Gamma-Glu-Phe	EF	0.598976	CaMPDE inhibitor /renin inhibitor	7.433	295.126	[M+H]+	295.129	True	68.52023:187567 77.0387:150683 84.04413:11683782 85.04761:459124 86.09634:194474 91.0543:171413 102.0539:483359 103.05347:772078 107.04857:614973 120.08019:51748088 121.06464:137559 121.08363:3547496 130.04808:4946443 131.04794:2107975 132.05138:141038 136.07431:732637 148.05933:150164 149.05879:2110472 150.06152:76716 166.08388:35371184 167.08727:3084104 186.08817:4821474 187.09206:488828 204.09…	2.91608e+09	3.22045e+09	3.57832e+09	3.14657e+09	2.47974e+09	2.90495e+09	3.07055e+08	4.51928e+08	3.29902e+08	1.91898e+08	4.24879e+08	2.55534e+08	6.60046e+08	6.90576e+08	6.05811e+08	7.45861e+08	7.40449e+08	8.61189e+08	8.63843e+08	7.68624e+08	8.30345e+08	8.26823e+08	8.86858e+08	7.8907e+08	1.04421e-15	3.04102e+09	3.69105e+08	1.50686e+08	12.1375	3.26866e+08	9.89476e+07	4.03952e+07	30.2716	7.17322e+08	8.77243e+07	3.58133e+07	12.2294	8.27594e+08	4.42626e+07
POS4553	DL-Leu-DL-Ala	LA	0.30745	activating ubiquitin-mediated proteolysis /ACE inhibitor /dipeptidyl peptidase III inhibitor	6.665	203.137	[M+H]+	203.139	True	52.27689:16840 56.04969:20498 60.04447:206353 69.07007:666456 69.71645:43191 70.07336:19553 72.98676:16908 75.55411:20317 86.09031:146176 86.09637:21406432 87.099:761617 87.10759:19631 90.05482:33449 92.79964:19505 102.81496:17823 138.48761:21251 158.11639:21768 203.07915:34499 203.13657:739361 204.10135:27849 204.13731:29301	9.02275e+08	1.89643e+09	1.18565e+09	3.76821e+08	7.8722e+08	1.94183e+09	5.07435e+07	7.64335e+07	8.49807e+07	3.76864e+07	1.13556e+08	1.24752e+08	3.05921e+09	4.42219e+08	2.15743e+09	6.06738e+09	2.83715e+09	4.67108e+09	3.46827e+09	5.73528e+09	1.74642e+09	4.88007e+09	1.69621e+09	3.089e+08	0.00371089	1.1817e+09	6.2772e+08	2.56266e+08	53.12	8.13588e+07	3.40635e+07	1.39064e+07	41.8683	3.20574e+09	1.9611e+09	8.00615e+08	61.1745	2.97252e+09	2.0854e+09
POS3229	Gly-Val	GV	0.182015		2.986	175.106	[M+H]+	175.108	True	55.05461:1012865 60.05598:624208 68.9184:269217 69.03351:399912 70.06496:892514 72.08094:37327024 73.08374:911068 84.04402:1162308 84.08066:122339 86.05994:2301935 87.04353:2848723 102.05386:298848 116.07008:553122 118.0849:23124896 119.08929:618685 129.10098:22463952 130.09589:316567 157.095:531616 158.07845:528479 159.06296:713196 175.10565:1140450 176.09038:464598	1.70096e+08	8.10493e+07	2.23434e+08	1.10246e+08	1.09866e+08	6.98138e+07	5.36718e+08	6.92963e+08	5.26519e+08	4.71829e+08	5.42513e+08	5.70238e+08	2.05472e+09	1.88586e+09	1.85563e+09	2.12656e+09	2.05759e+09	1.8116e+09	1.84964e+09	1.78046e+09	1.61278e+09	1.79209e+09	1.68465e+09	2.00368e+09	1.76828e-18	1.27418e+08	5.85009e+07	2.38829e+07	45.9128	5.56797e+08	7.41152e+07	3.02574e+07	13.311	1.96533e+09	1.29986e+08	5.30665e+07	6.61395	1.78722e+09	1.35478e+08
[truncated: 16 more columns]
