# Supplementary material for: In-depth Proteomic Analysis of Alfalfa Silage Inoculated with Lactiplantibacillus plantarum Reveals Protein Transformation Mechanisms and Optimizes Dietary N Utilization
Source: Research Square preprint supplement (doi:10.21203/rs.3.rs-4190256/v1), 2024-04-11
Supplement: Supplementary file 3 [file b699192a24eb3beffe83c93b.xlsx]

## Sheet: Sheet1
ID	Metabolite.name	KEGGID	HMDBID	Class	CK-7	CK-8	CK-9	CK-10	CK-11	LN-7	LN-8	LN-9	LN-10	LN-11	LB-7	LB-8	LB-9	LB-10	LB-11	LNLB	FR-7	FR-8	FR-9	FR-10	FR-11	average	P.value	VIP	PLSDA.VIP	RF.MDA	Sig
AA-207	L-Glutamate	C00025	HMDB0000148	Amino acid	6.83287e+07	7.13446e+07	9.51341e+07	8.79e+07	9.42164e+07	1.44985e+08	1.47406e+08	1.14993e+08	1.0386e+08	1.02062e+08	1.31204e+08	9.90897e+07	1.06788e+08	1.0287e+08	1.32142e+08	1.1854e+08	8.00492e+07	8.47423e+07	7.43172e+07	7.964e+07	7.91021e+07	1.00891e+08	0.000517447	1.52162	1.30447	0.0246272	Sig
AA-203-1	Arginine	C00062	HMDB0000517	Amino acid	6.1751e+07	8.21453e+07	6.61715e+07	6.23838e+07	6.88348e+07	1.0737e+08	1.15673e+08	1.29469e+08	1.38003e+08	1.2188e+08	1.11093e+08	9.41352e+07	8.98123e+07	9.45132e+07	9.26978e+07	1.09465e+08	9.3786e+06	1.04251e+07	9.17258e+06	9.54073e+06	1.05877e+07	7.59287e+07	2.84437e-12	1.30406	1.21022	0.0366807	Sig
AA-211-1	Isoleucine	C00407	HMDB0000172	Amino acid	9.58172e+07	1.05035e+08	1.09615e+08	1.05752e+08	9.30996e+07	1.19638e+08	1.1772e+08	1.07041e+08	1.1858e+08	9.79006e+07	9.86427e+07	9.36397e+07	9.37601e+07	1.06452e+08	1.13264e+08	1.06664e+08	5.05001e+07	5.26414e+07	4.9477e+07	5.56375e+07	5.55852e+07	9.26887e+07	3.76359e-09	0.737796	0.752491	0.0146548	NoSig
AA-204-1	Asparagine	C00152	HMDB0000168	Amino acid	9.55227e+07	1.01071e+08	1.00565e+08	9.99305e+07	9.645e+07	1.06457e+08	1.00932e+08	1.14177e+08	1.00793e+08	1.01071e+08	1.07262e+08	9.49279e+07	1.13499e+08	1.15406e+08	1.00348e+08	1.05487e+08	8.56822e+07	8.67034e+07	7.90002e+07	9.0185e+07	8.44977e+07	9.90462e+07	0.000101115	0.85979	0.862763	0.0190556	NoSig
AA-216-1	Proline	C00148	HMDB0000162	Amino acid	9.81734e+07	8.5118e+07	8.84969e+07	8.55715e+07	8.18302e+07	9.86503e+07	1.14649e+08	1.11119e+08	1.07336e+08	9.81978e+07	9.86427e+07	9.43334e+07	9.96818e+07	1.01477e+08	9.18037e+07	1.01589e+08	9.40825e+07	9.02129e+07	9.15222e+07	9.5809e+07	9.58998e+07	9.63903e+07	0.000591751	1.59518	1.49085	0.0125916	Sig
AA-212-1	Leucine	C00123	HMDB0000687	Amino acid	1.021e+08	1.06026e+08	1.10621e+08	1.01095e+08	1.11679e+08	9.01337e+07	8.39396e+07	8.97108e+07	8.2393e+07	8.45235e+07	9.7685e+07	1.00507e+08	1.0363e+08	9.93881e+07	9.60759e+07	9.27986e+07	5.02037e+07	5.09899e+07	4.97824e+07	5.58384e+07	5.22257e+07	8.62545e+07	1.90391e-13	0.131	0.687873	0.0541093	NoSig
AA-215-1	Phenylalanine	C00079	HMDB0000159	Amino acid	8.01095e+07	8.30371e+07	8.73906e+07	8.17878e+07	8.98508e+07	8.23269e+07	8.18923e+07	8.76719e+07	8.71975e+07	8.20462e+07	8.01592e+07	8.05004e+07	8.09298e+07	8.34701e+07	8.21663e+07	8.28361e+07	5.77145e+07	5.60476e+07	5.33455e+07	6.21654e+07	5.20221e+07	7.68889e+07	4.11933e-10	0.439874	0.607621	0.0175298	NoSig
AA-210	histidine	C00135	HMDB0000177	Amino acid	1.14372e+08	1.1098e+08	1.14945e+08	1.14483e+08	1.43152e+08	9.82448e+07	1.04413e+08	1.08061e+08	1.01305e+08	1.15935e+08	5.84195e+07	6.37146e+06	6.43491e+07	6.45675e+07	5.96128e+07	7.81278e+07	1.00803e+08	1.04251e+08	1.09745e+08	1.1951e+08	1.01397e+08	9.49069e+07	8.93014e-06	0.745881	1.03636	0.0623155	NoSig
AA-202-1	Alanine	C00041	HMDB0000161	Amino acid	8.21711e+07	8.4028e+07	8.14573e+07	7.36381e+07	8.15256e+07	8.23269e+07	8.2097e+07	7.6662e+07	8.2393e+07	7.90735e+07	6.99118e+07	7.53081e+07	7.5699e+07	7.09347e+07	7.19327e+07	7.66339e+07	4.28905e+07	5.30543e+07	4.29615e+07	4.11758e+07	5.81303e+07	7.06669e+07	9.68207e-09	0.412638	0.567839	0.0341448	NoSig
AA-219-1	Tryptophan	C00078	HMDB0000929	Amino acid	6.5678e+07	5.4103e+07	5.69196e+07	6.51004e+07	5.10677e+07	7.98936e+07	8.11757e+07	7.98222e+07	8.15752e+07	7.45154e+07	7.37426e+07	6.56182e+07	7.65872e+07	7.47152e+07	6.93495e+07	7.56995e+07	5.67262e+07	5.85248e+07	5.95556e+07	6.26675e+07	5.78249e+07	6.76601e+07	1.53008e-06	1.75417	1.56123	0.0136806	Sig
AA-208-1	Glutamine	C00064	HMDB0000641	Amino acid	9.59154e+07	1.01071e+08	1.03582e+08	8.79e+07	9.82774e+07	6.76256e+07	6.86871e+07	6.89142e+07	6.71615e+07	6.5201e+07	4.73102e+07	4.17861e+07	4.31297e+07	4.855e+07	5.92153e+07	5.77581e+07	8.39034e+07	8.14393e+07	8.95879e+07	8.7373e+07	9.07078e+07	7.40522e+07	2.26427e-10	1.49118	1.36193	0.0570619	Sig
AA-213-1	Lysine	C00047	HMDB0000182	Amino acid	6.52853e+07	7.17409e+07	6.90879e+07	5.93762e+07	7.12715e+07	4.62328e+07	4.73952e+07	4.73021e+07	4.63077e+07	4.5284e+07	4.62567e+07	4.1142e+07	4.50049e+07	4.74556e+07	3.56683e+07	4.48049e+07	1.05744e+08	1.00948e+08	1.03841e+08	1.25536e+08	1.11985e+08	6.56033e+07	2.09524e-11	1.09302	0.993306	0.0274583	Sig
AA-217-1	Serine	C00065	HMDB0000187	Amino acid	3.57351e+07	3.61677e+07	3.77117e+07	3.49272e+07	3.55342e+07	3.05177e+07	2.98907e+07	3.18066e+07	2.53517e+07	2.85378e+07	2.89224e+07	2.24587e+07	3.11876e+07	3.03437e+07	2.69251e+07	2.85942e+07	9.98144e+06	9.95025e+06	1.22165e+07	1.38592e+07	1.03841e+07	2.62383e+07	1.46718e-10	0.085296	0.58528	0.0350123	NoSig
AA-205-1	Aspartate	C00049	HMDB0000191	Amino acid	3.52442e+07	3.05196e+07	4.40473e+07	3.10464e+07	4.10166e+07	2.03789e+07	2.10873e+07	1.6413e+07	2.0956e+07	2.25924e+07	2.79647e+07	2.33852e+06	2.07259e+07	2.33796e+07	2.62296e+07	2.02066e+07	1.76899e+07	1.76503e+07	1.74086e+07	1.87802e+07	1.54743e+07	2.33881e+07	0.000586747	1.10616	1.09071	0.0295575	Sig
AA-221-1	Valine	C00183	HMDB0000883	Amino acid	1.83584e+07	1.95207e+07	2.61468e+07	1.66874e+07	2.69045e+07	2.09873e+07	1.57643e+07	2.1816e+07	1.67648e+07	2.26915e+07	1.92497e+07	1.97188e+07	2.26011e+07	2.00965e+07	1.97716e+07	1.99462e+07	6.97712e+06	7.9891e+06	6.84126e+06	6.26675e+06	6.89216e+06	1.72377e+07	1.61423e-06	0.248129	0.606833	0.0222601	NoSig
AA-214-1	Methionine	C00073	HMDB0000696	Amino acid	1.61004e+07	1.73407e+07	1.74982e+07	1.62023e+07	1.71579e+07	1.55123e+07	1.64808e+07	1.71266e+07	1.57426e+07	1.58543e+07	1.46528e+07	1.51746e+07	1.60774e+07	1.55201e+07	1.43071e+07	1.56449e+07	907224	951674	974268	1.01433e+06	1.07913e+06	1.24438e+07	8.13666e-18	0.415749	0.598437	0.0248948	NoSig
AA-218-1	Threonine	C00188	HMDB0000167	Amino acid	2.07146e+07	2.17006e+07	2.15208e+07	1.98891e+07	2.08129e+07	1.59179e+07	1.76068e+07	1.67188e+07	1.61515e+07	1.6548e+07	1.50358e+07	1.21246e+07	1.62847e+07	1.43262e+07	1.45058e+07	1.5522e+07	7.65902e+06	8.72195e+06	7.42154e+06	7.49198e+06	8.33778e+06	1.50006e+07	3.06515e-12	0.288626	0.625659	0.0459524	NoSig
AA-220-1	Tyrosine	C00082	HMDB0000158	Amino acid	2.01255e+06	1.9917e+06	1.83028e+06	1.72695e+06	1.93915e+06	3.85274e+06	3.75681e+06	3.20104e+06	3.24052e+06	4.03295e+06	3.51475e+06	3.62173e+06	3.92806e+06	3.28309e+06	3.49728e+06	3.5929e+06	1.9864e+06	2.1263e+06	2.32114e+06	1.48634e+06	1.78158e+06	2.79639e+06	6.74339e-09	1.75858	1.55377	0.0169886	Sig
AA-209-1	Glycine	C00037	HMDB0000123	Amino acid	2.11073e+06	2.18988e+06	2.3331e+06	1.9598e+06	1.86808e+06	1.56137e+06	1.26728e+06	1.55974e+06	1.60493e+06	1.63498e+06	1.69512e+06	1.38032e+06	1.76664e+06	1.80073e+06	1.232e+06	1.55031e+06	62062.8	54602.5	60980.9	59152.5	70957.7	1.32489e+06	2.30477e-11	0.0670036	0.57774	0.0344246	NoSig
AA-206-1	Cysteine	C00097	HMDB0000574	Amino acid	586095	638137	624506	565626	586822	470439	498519	407776	432410	487521	405106	492476	416492	436751	491805	453930	180852	249789	233132	193827	206663	431365	9.19615e-11	0.278508	0.620215	0.0476647	NoSig
